# Supplementary material
Source: PubMed Central journal article supplement (PMC8105289)
Supplement: NIHMS1688360-supplement-1.pdf [file NIHMS1688360-supplement-1.pdf]

## Supporting Information

### Structure Property Relationships of *N*-Acylsulfonamides and Related Bioisosteres

Karol R. Francisco,<sup>a</sup> Carmine Varricchio,<sup>b</sup> Thomas J. Paniak,<sup>c</sup> Marisa C. Kozlowski,<sup>c</sup> Andrea Brancale,<sup>b</sup> and Carlo Ballatore<sup>d,\*</sup>

<sup>a</sup>Department of Chemistry & Biochemistry, University of California San Diego, 9500 Gilman Drive, La Jolla, CA, 92093, USA; <sup>b</sup>Cardiff School of Pharmacy and Pharmaceutical Sciences, Cardiff, King Edward VII Avenue, Cardiff CF103NB, UK; <sup>c</sup>Department of Chemistry, School of Arts and Sciences, University of Pennsylvania, 231 South 34<sup>th</sup> St., Philadelphia, PA 19104-6323; <sup>d</sup>Skaggs School of Pharmacy and Pharmaceutical Sciences, University of California, San Diego, 9500 Gilman Drive, La Jolla, CA 92093

\*Corresponding Author.

### Table of Contents

**S2.** Figures S1–S3

**S5.** NMR (<sup>1</sup>H, <sup>13</sup>C) of compounds **11-32**

**S49.** Potentiometric acidity (p*K*<sub>a</sub>) reports of compounds **9-13, 15-18, 20-32**

**S71.** Potentiometric lipophilicity (log*P*<sub>octanol</sub> and log*D*<sub>7.4</sub>) reports of compounds **9-13, 15, 21, 24, 26, 27-32**; log*P*<sub>hydrocarbon</sub> (cyclohexane, heptane, toluene) of compounds **9, 12, 13, 15**

**S100.** Experimental details on PAMPA Analyses

**S101.** Experimental details on shake-flask log*D*<sub>7.4</sub> determinations

**S102.** High Performance Liquid Chromatograph (HPLC) traces of representative compounds

**S112.** Figure S4 Lipophilicity, Permeability, and Acidity graph of acidic isosteres and structures

**S113.** Crystallography reports of compounds **15, 16, 18, 19, 21**

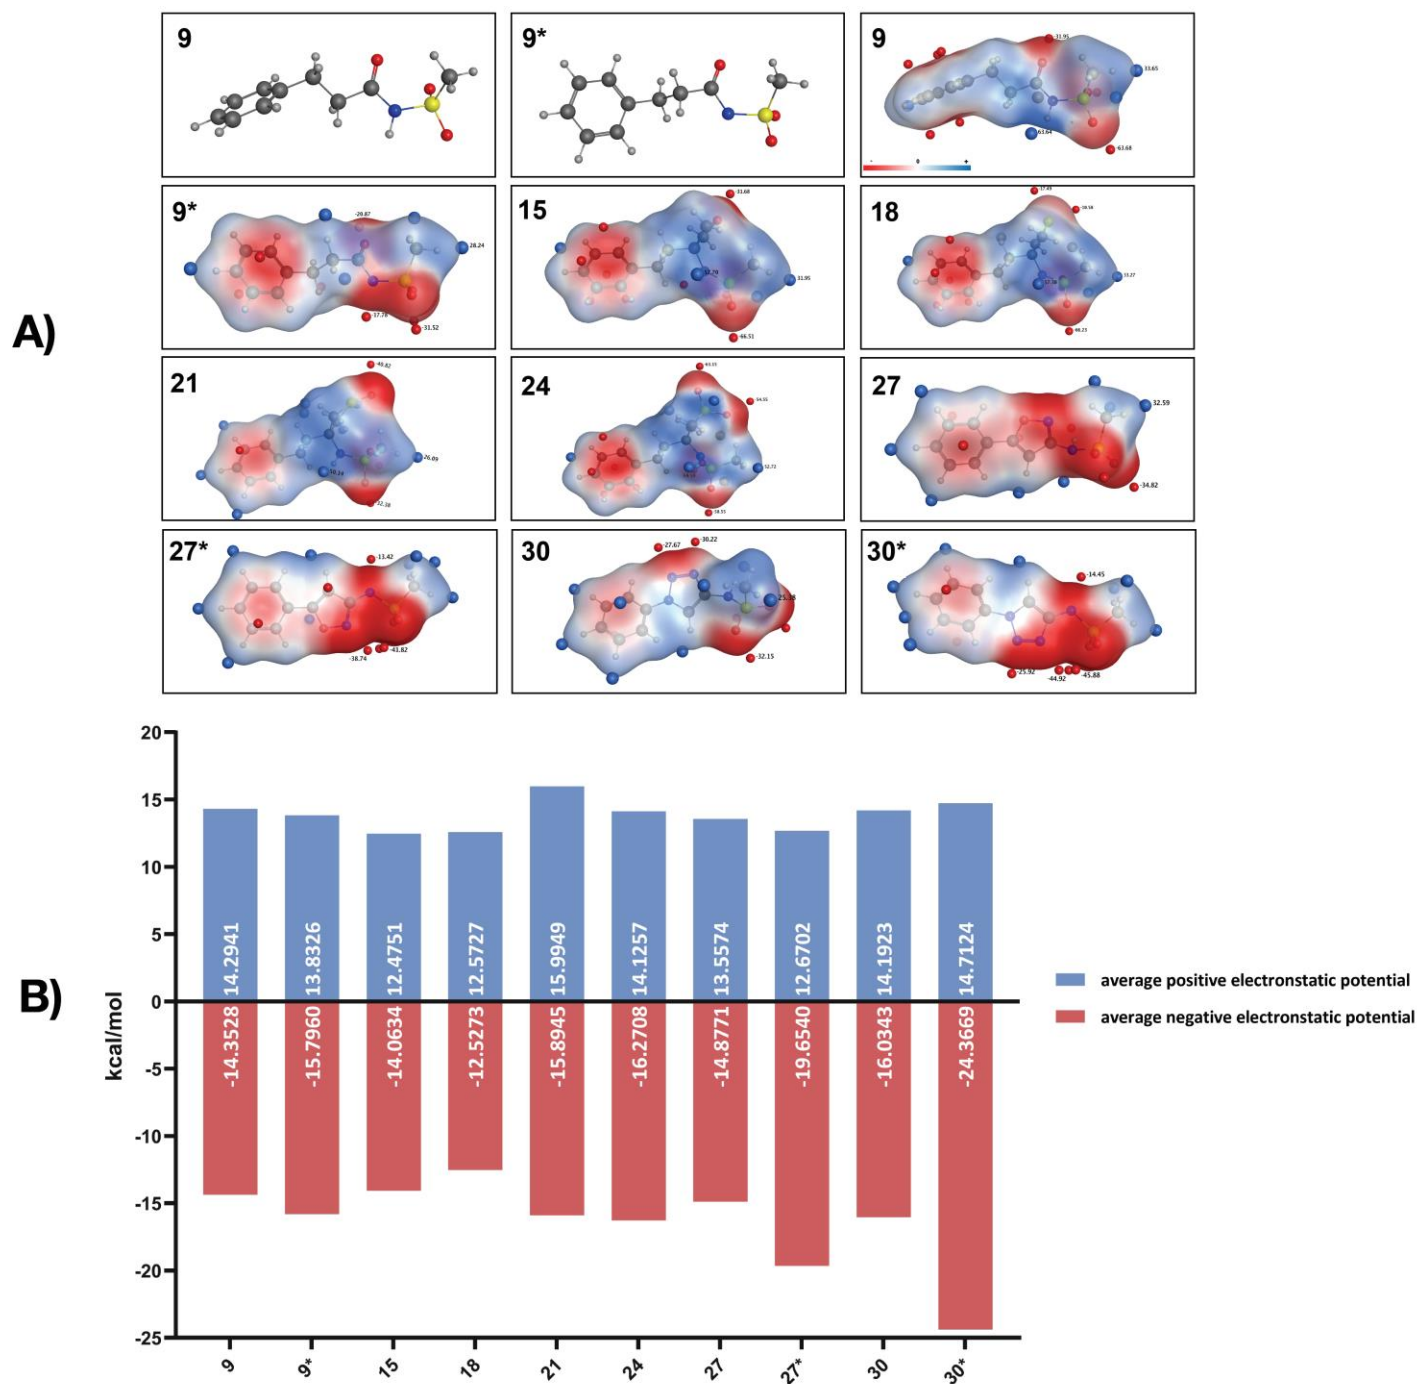

**Figure S1.** (A) comparison of Gaussian-optimized geometry and electrostatic potential maps of *N*-acylsulfonamide **9** and its derivatives **15**, **18**, **21**, **24**, **27** and **30**. Compounds that based on  $pK_a$  determinations are expected to be mostly charged at physiological pH are shown both in their neutral (*i.e.*, **9**, **27** and **30**) and deprotonated (*i.e.*, **9\***, **27\*** and **30\***) forms. (B) Average electrostatic potential values of the gaussian-optimized structure showing positive and negative average ESP values of each compound.

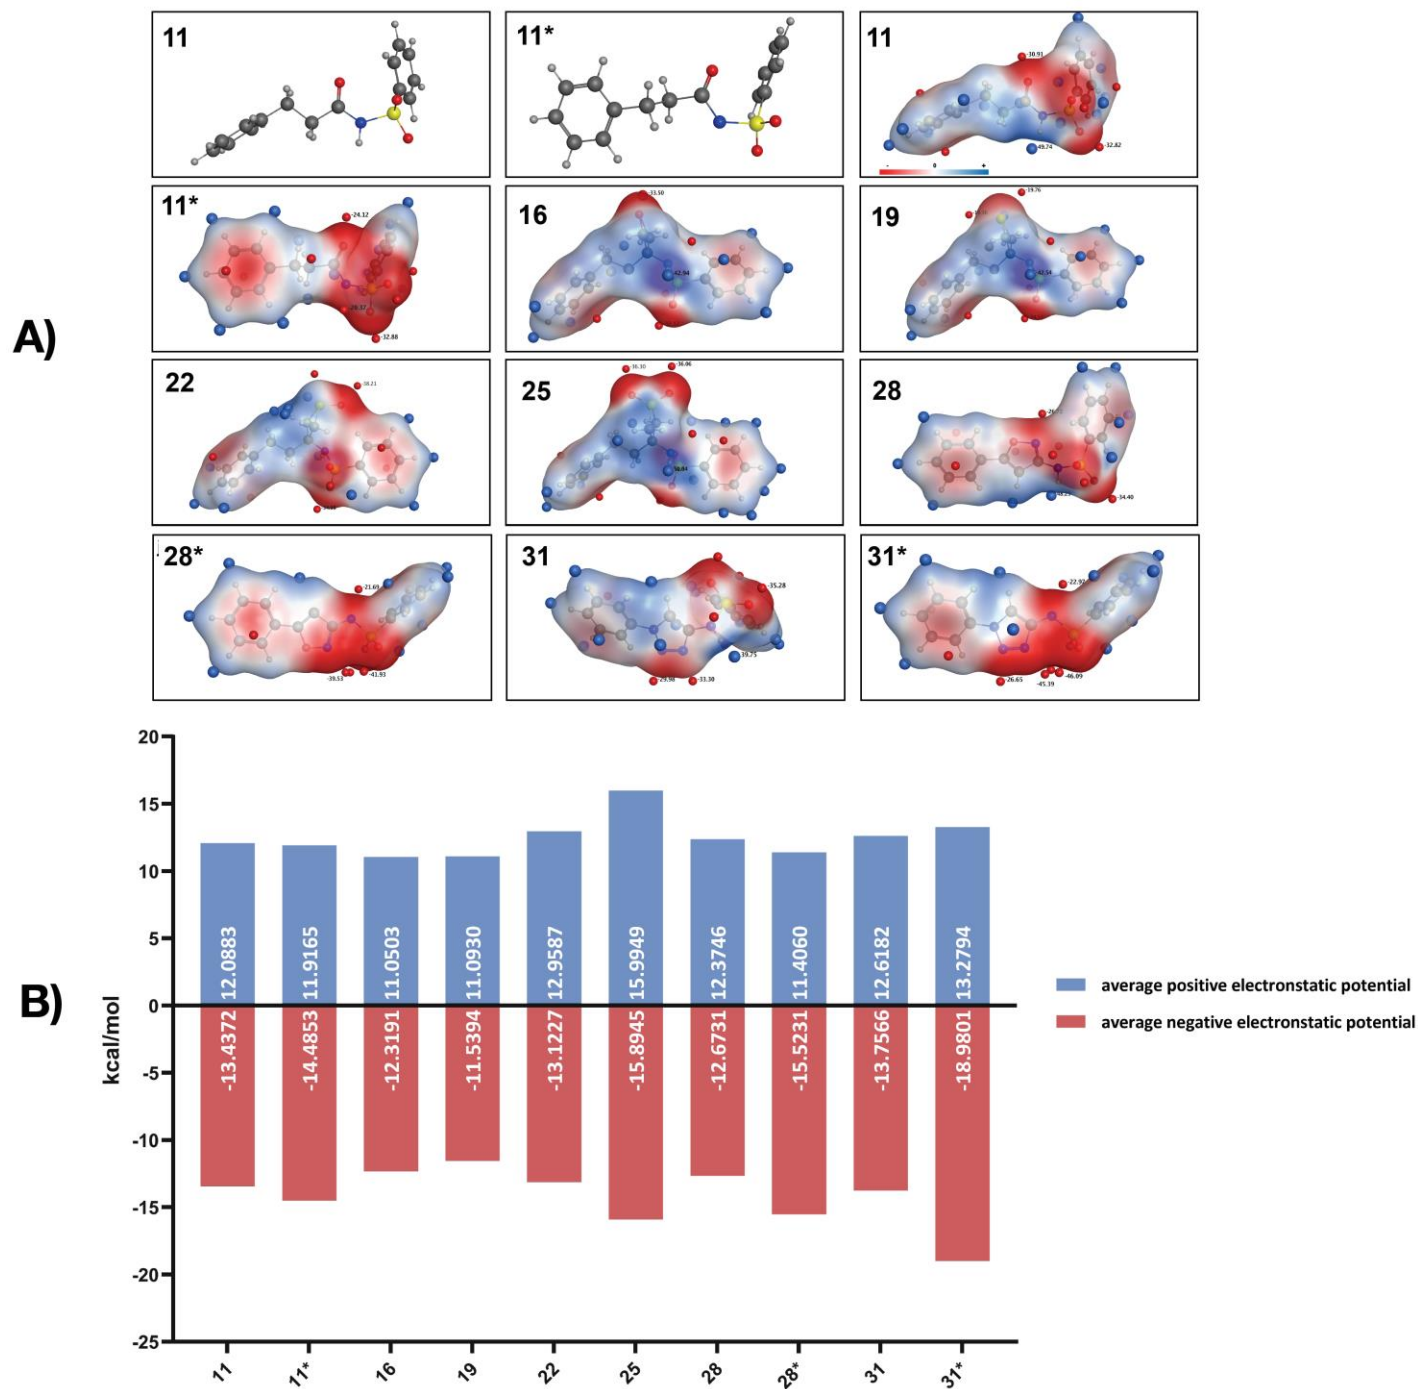

**Figure S2.** (A) comparison of Gaussian-optimized geometry and electrostatic potential maps of *N*-acylsulfonamide **11** and its derivatives **16**, **19**, **22**, **25**, **28** and **31**. Compounds that based on  $pK_a$  determinations are expected to be mostly charged at physiological pH are shown both in their neutral (*i.e.*, **11**, **28** and **31**) and deprotonated (*i.e.*, **11\***, **28\*** and **31\***) forms. (B) Average electrostatic potential values of the gaussian-optimized structure showing positive and negative average ESP values of each compound.

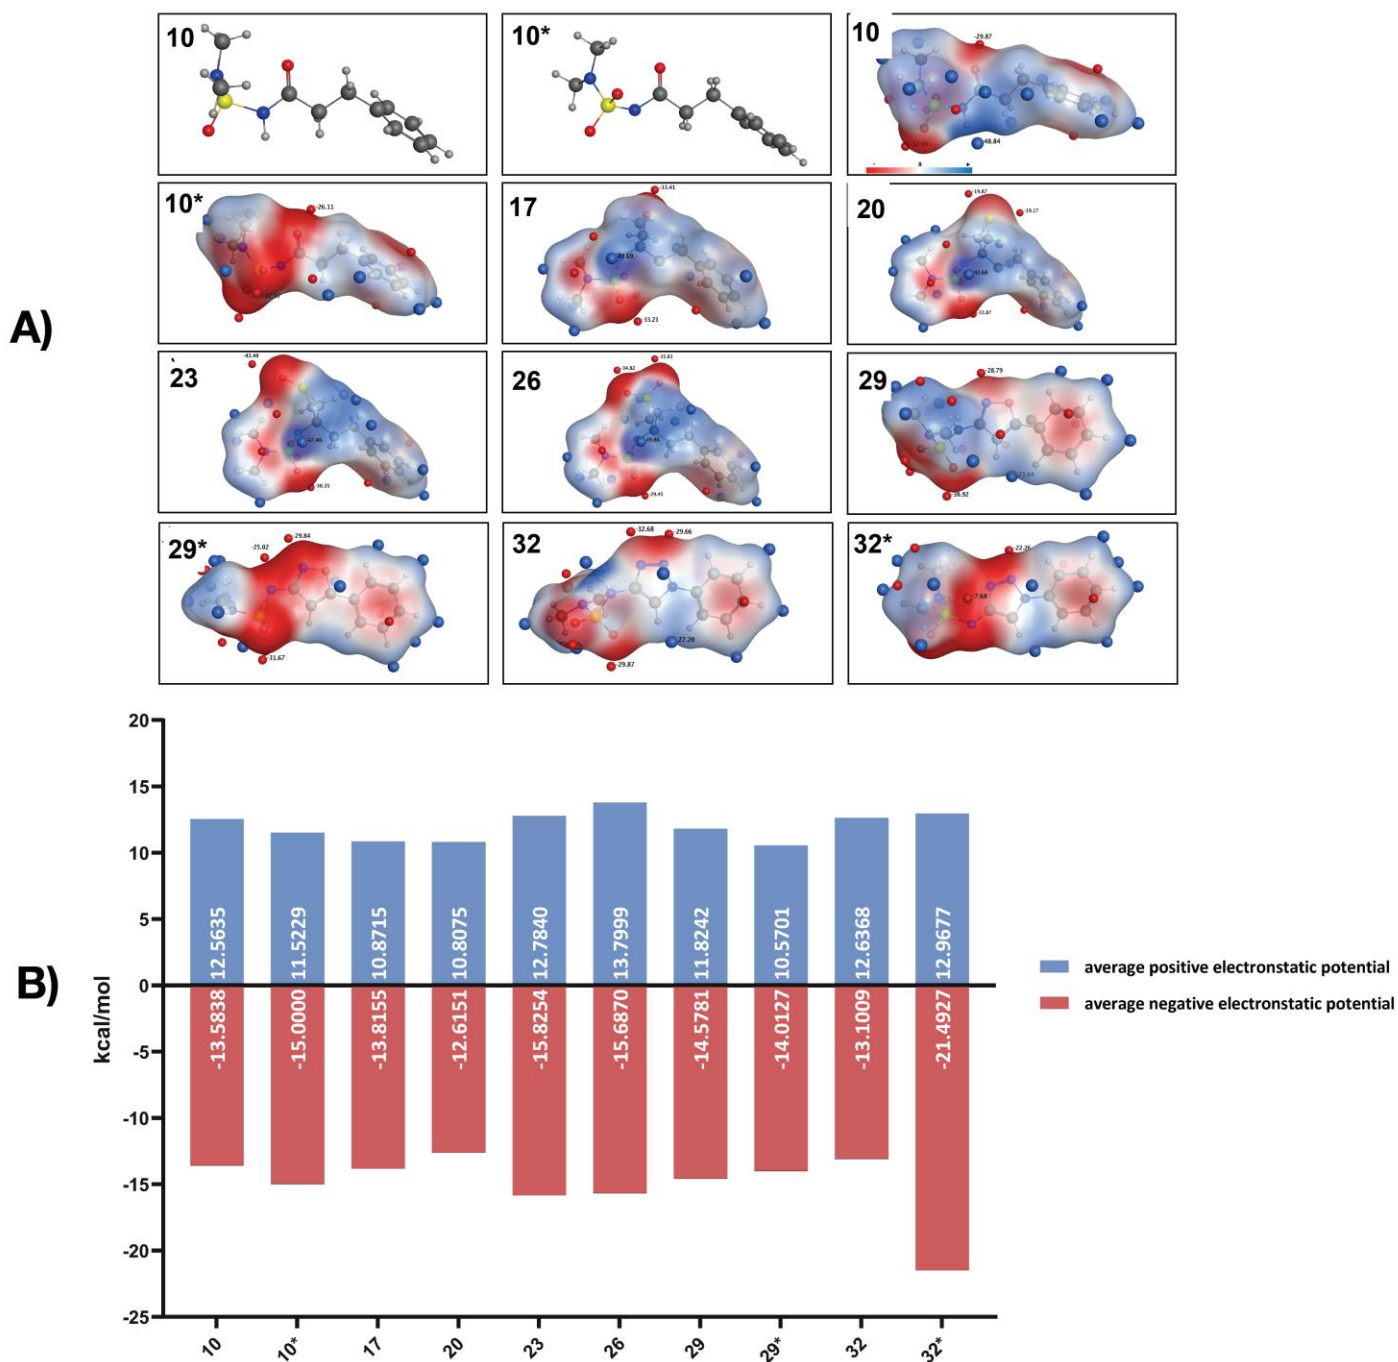

**Figure S3.** (A) comparison of Gaussian-optimized geometry and electrostatic potential maps of *N*-acylsulfonamide **10** and its derivatives **17**, **20**, **23**, **26**, **29** and **32**. Compounds that based on  $pK_a$  determinations are expected to be mostly charged at physiological pH are shown both in their neutral (*i.e.*, **10**, **29** and **32**) and deprotonated (*i.e.*, **10\***, **29\*** and **32\***) forms. (B) Average electrostatic potential values of the gaussian-optimized structure showing positive and negative average ESP values of each compound.

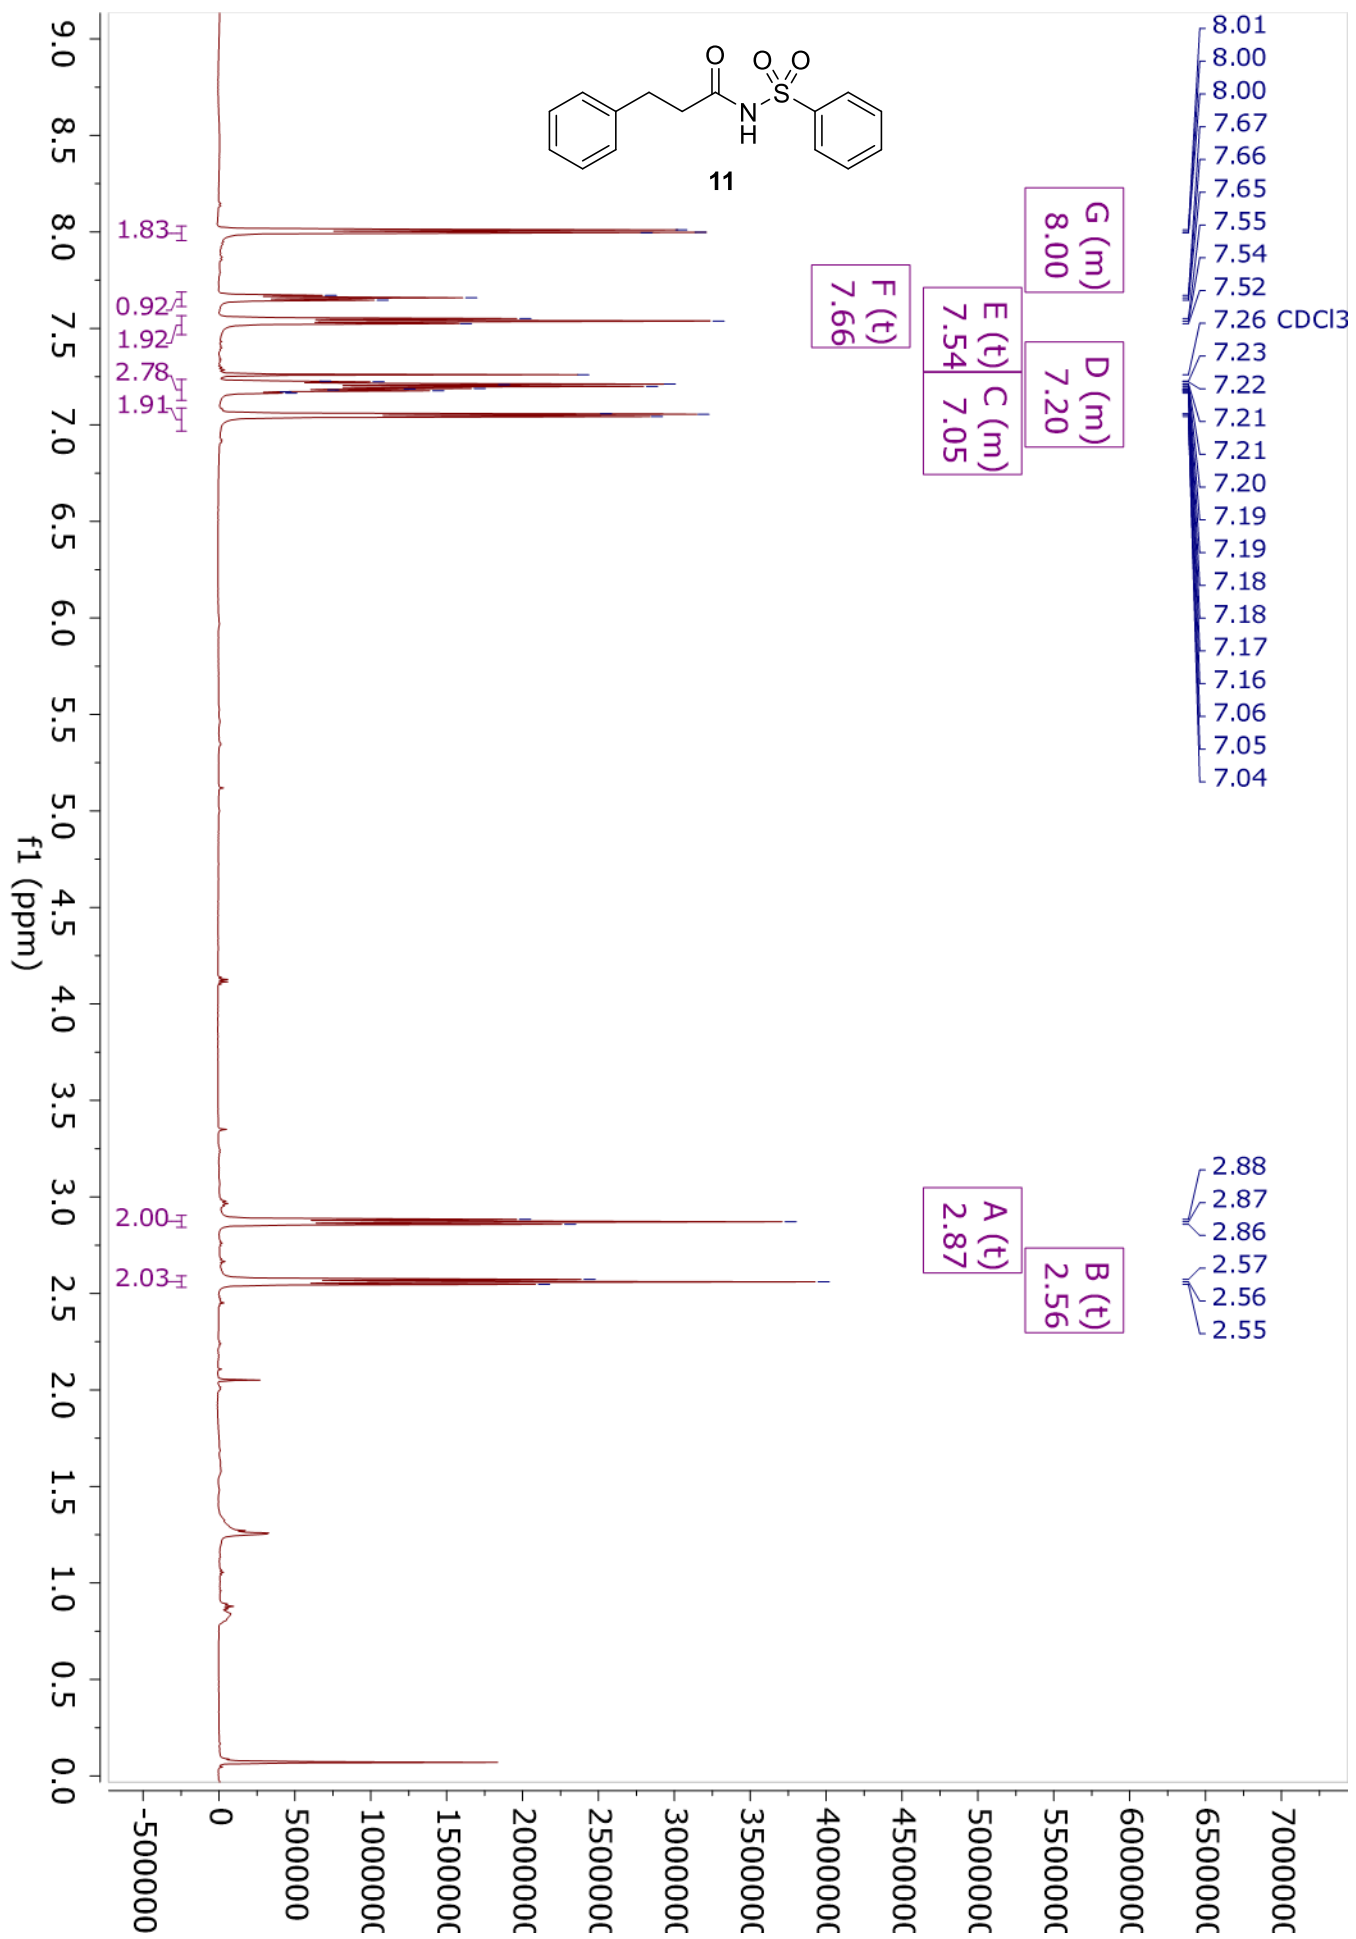

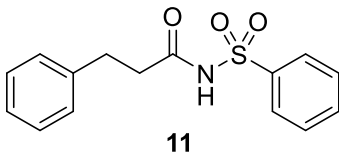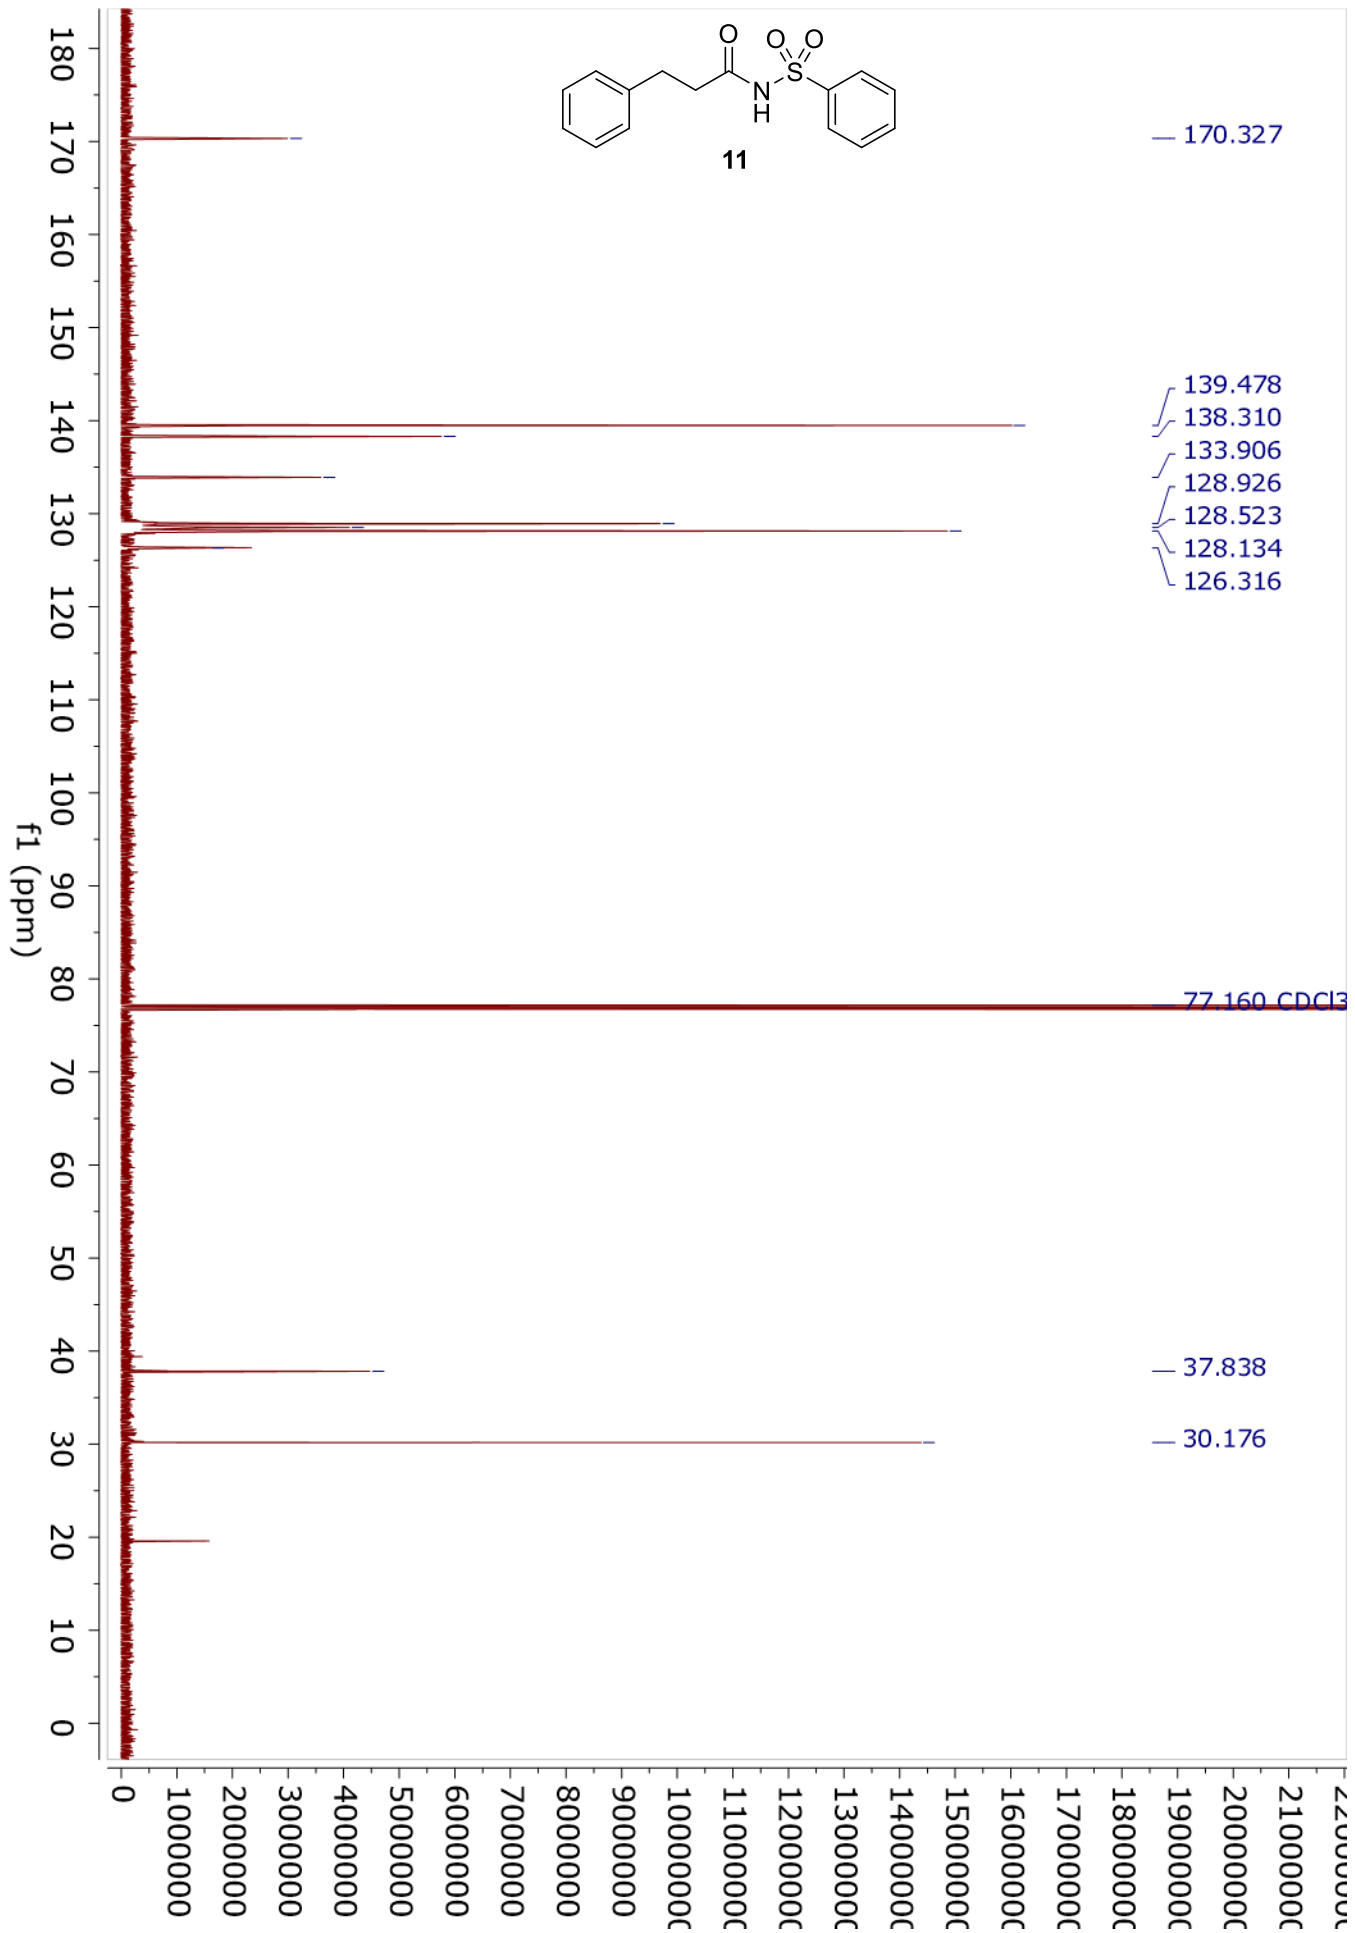

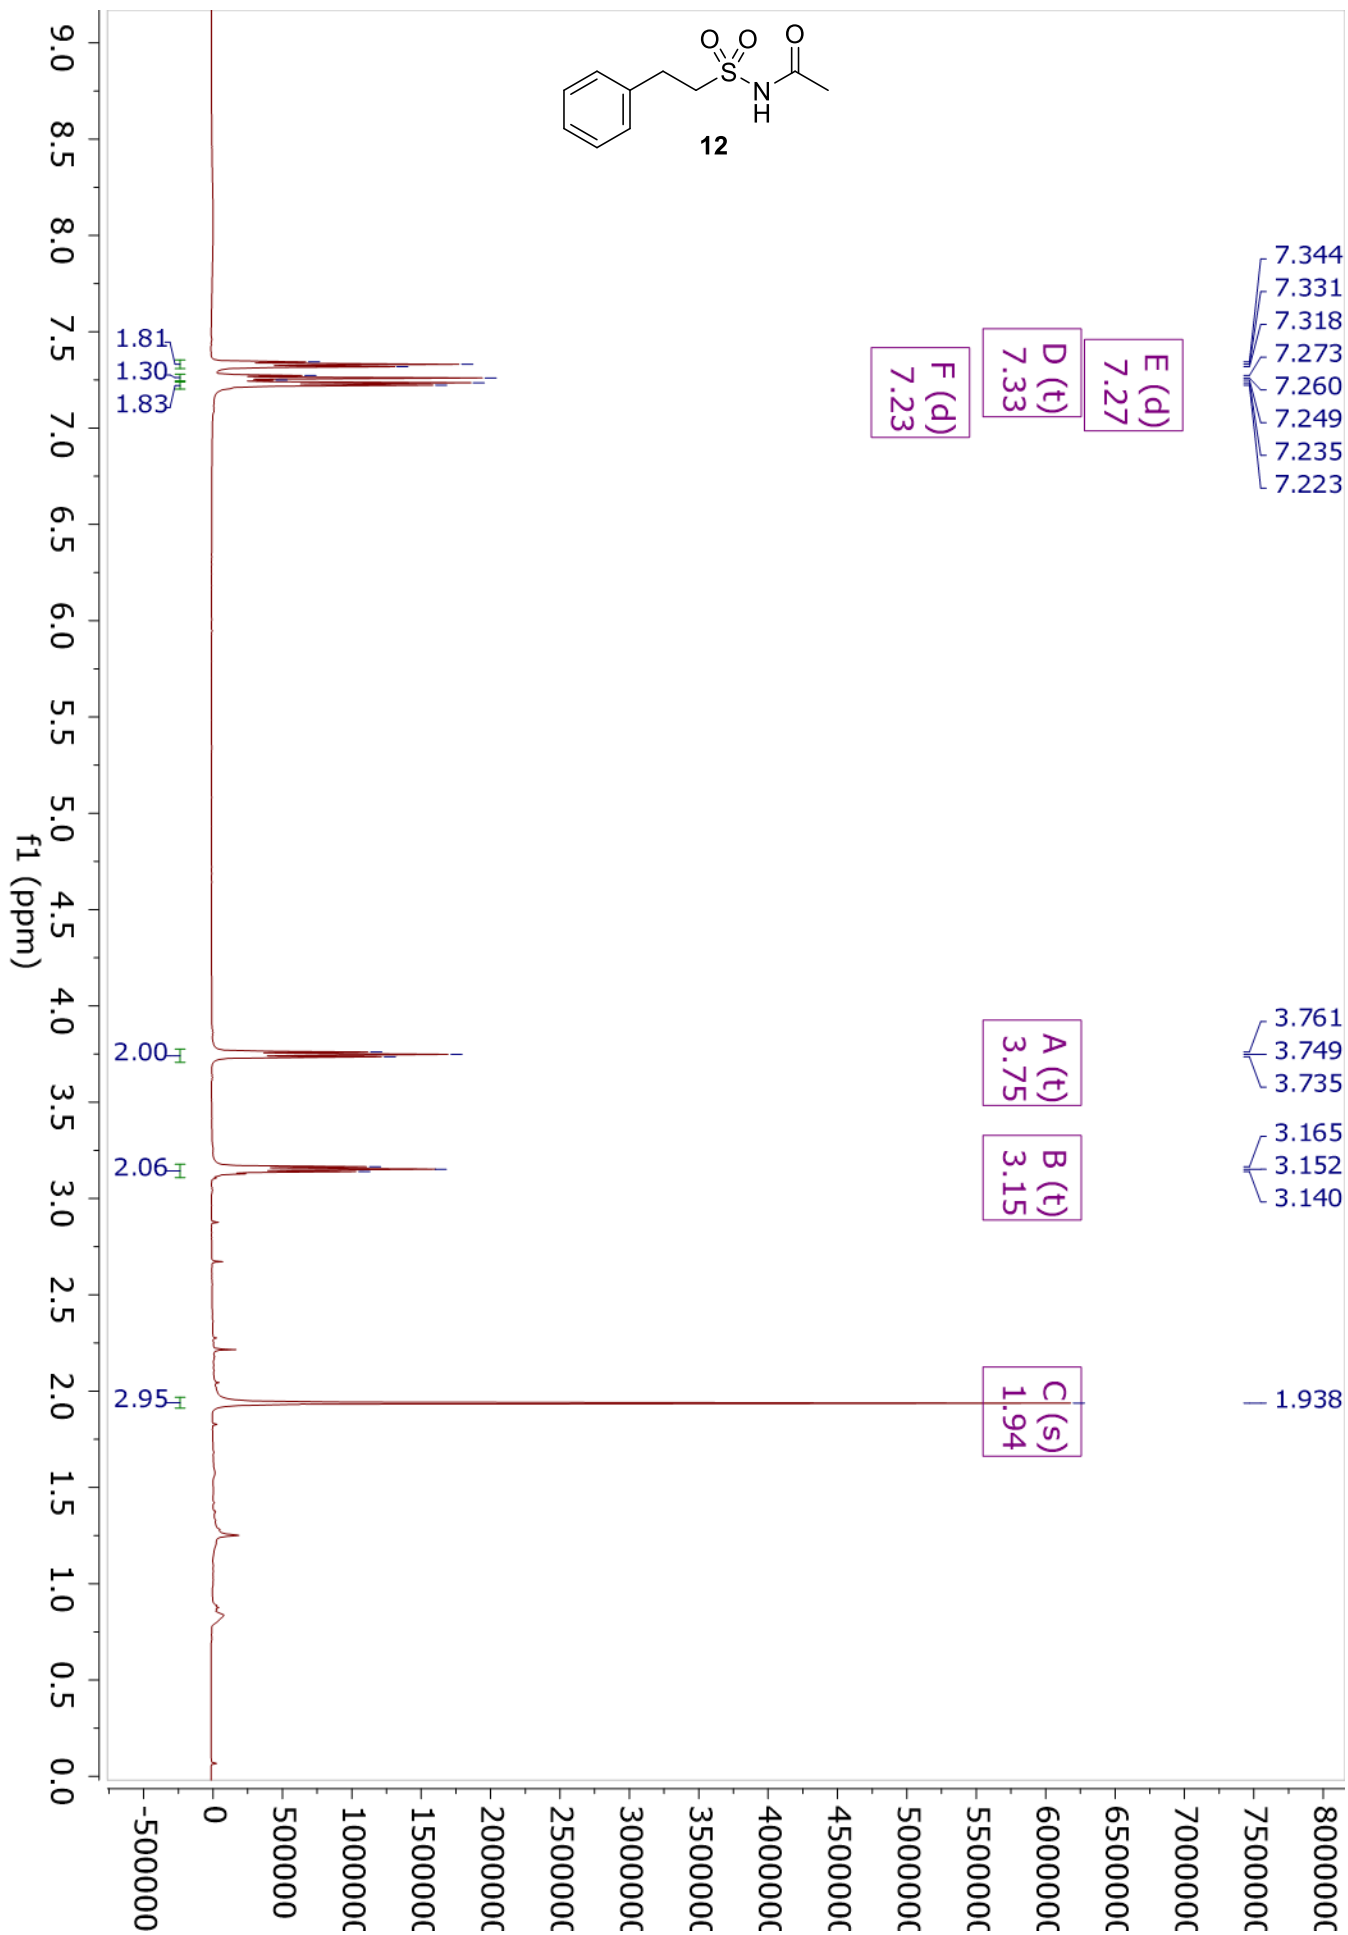

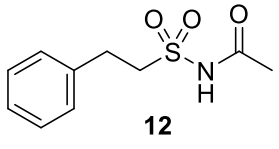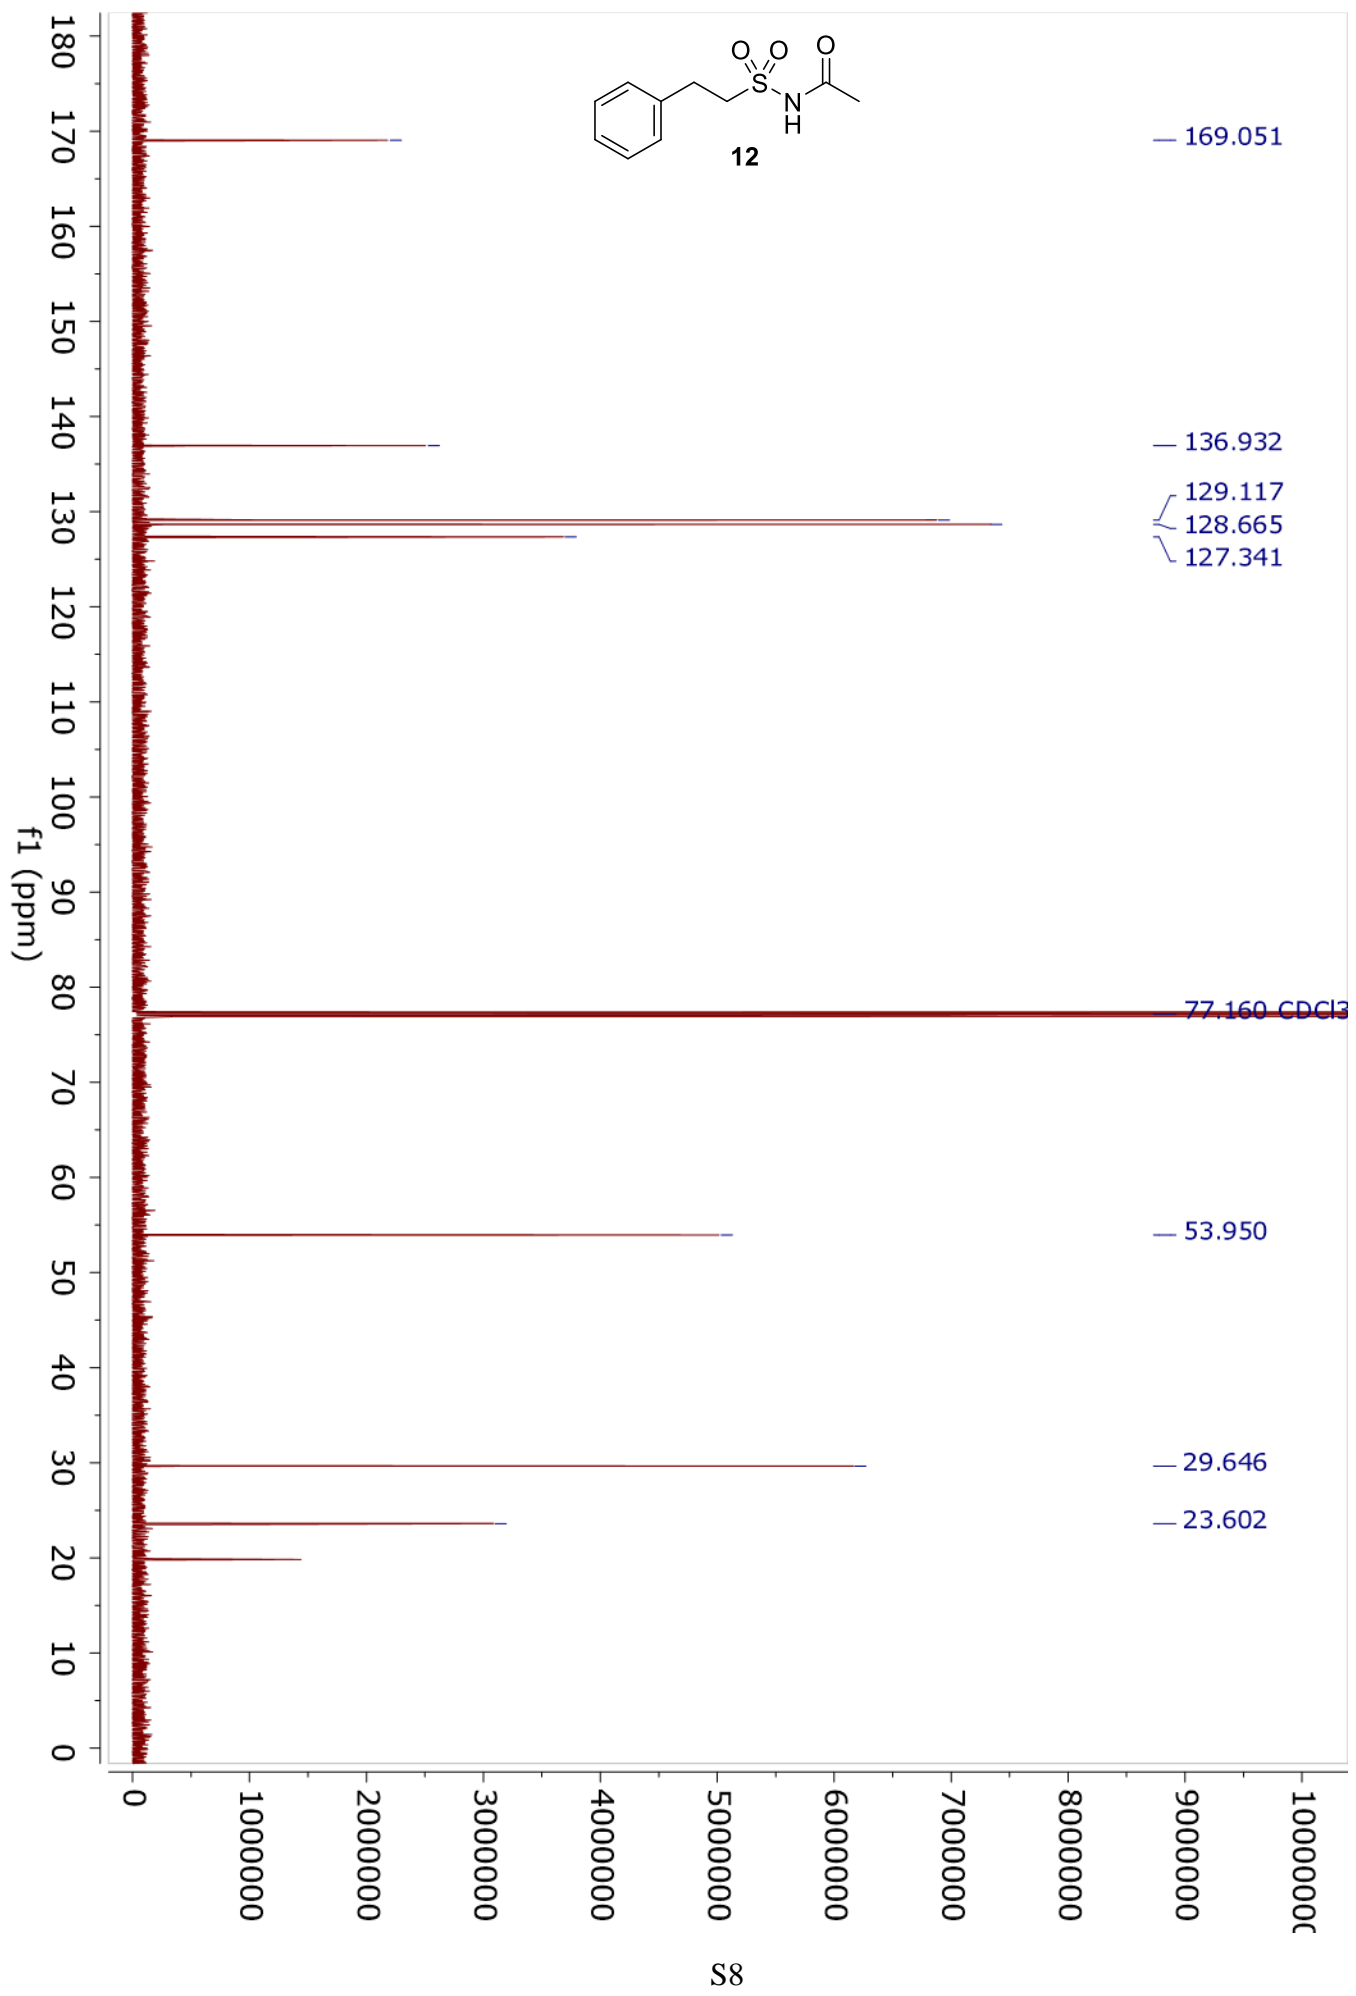



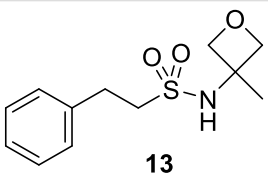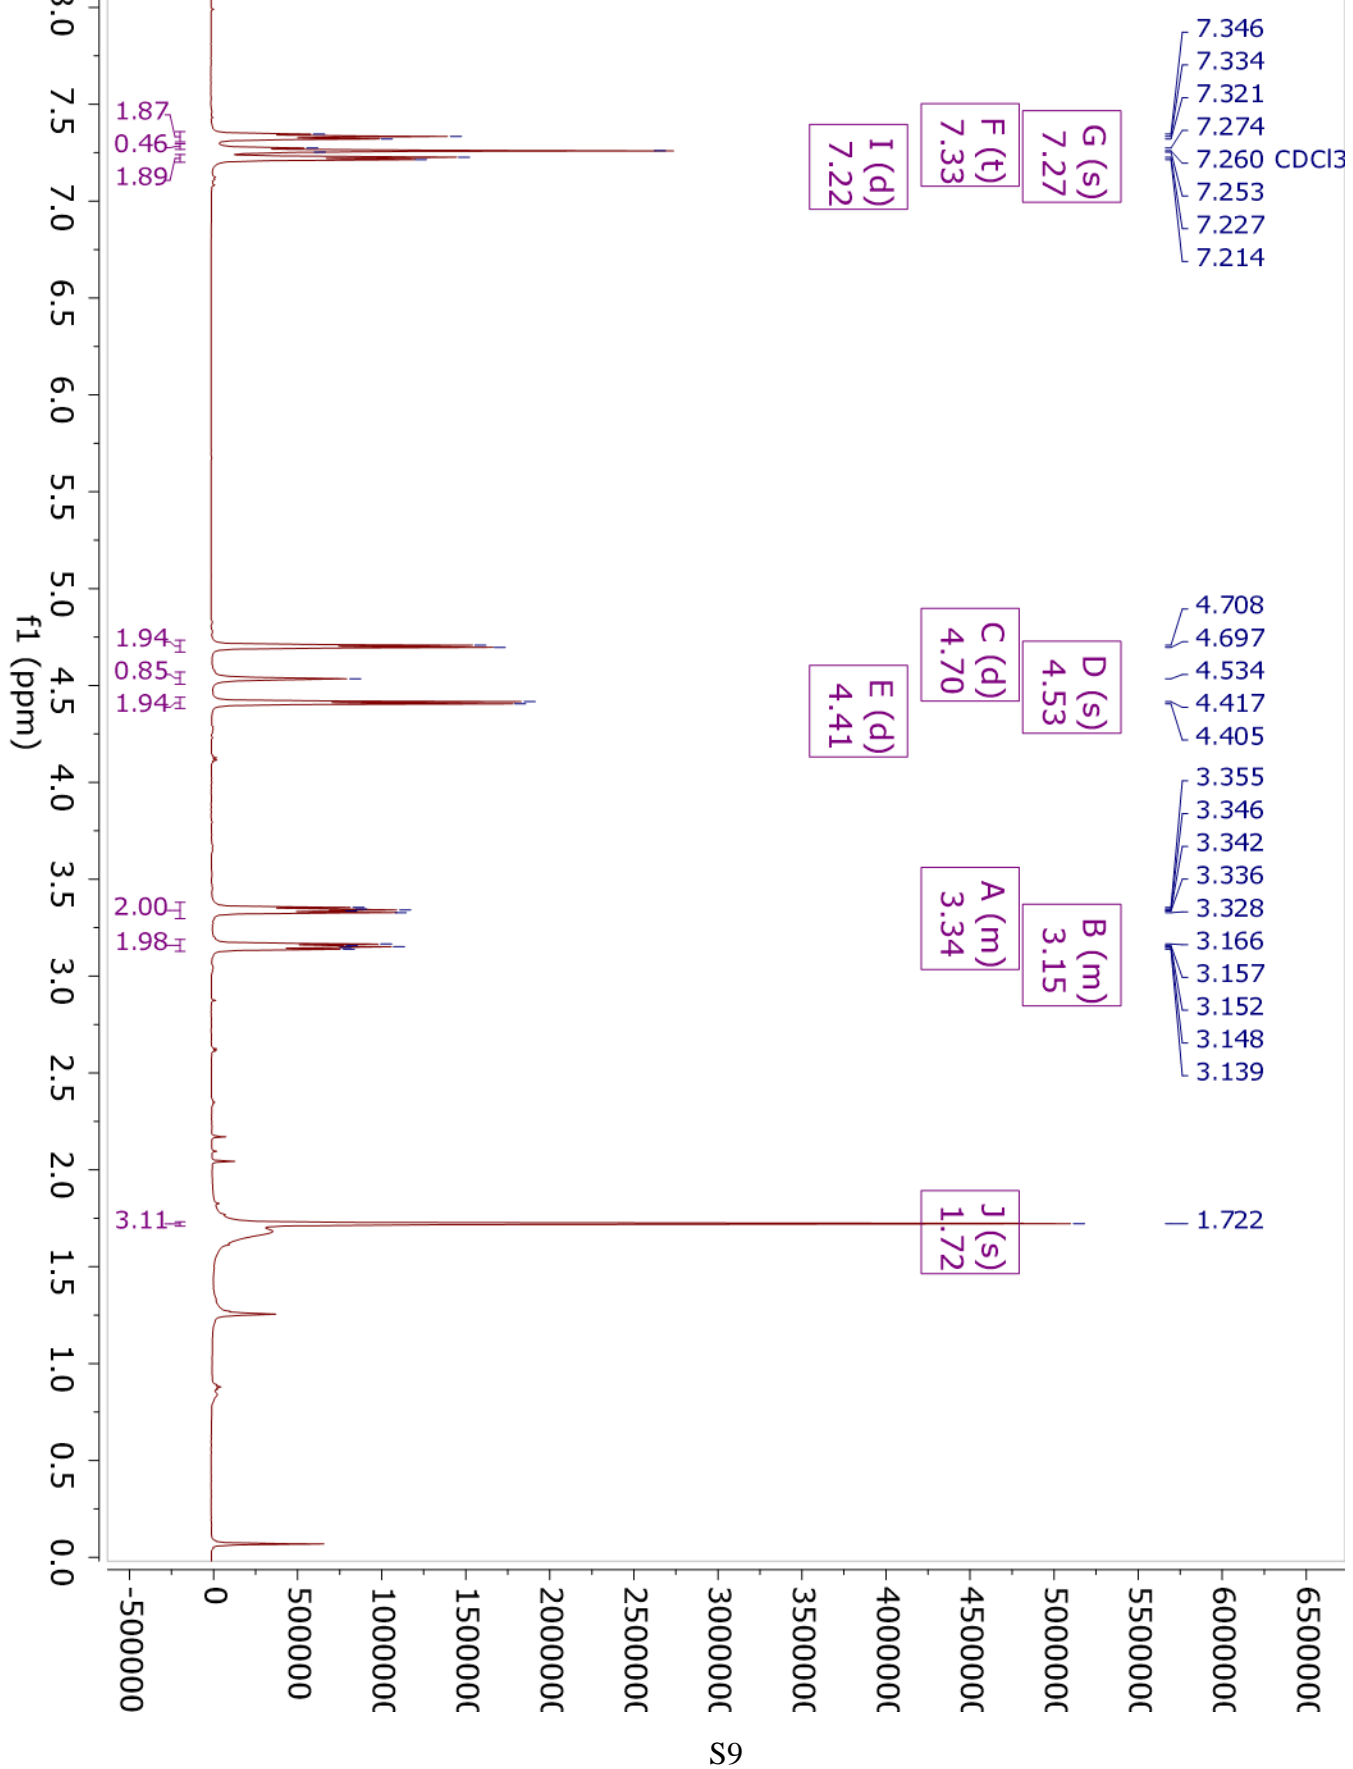

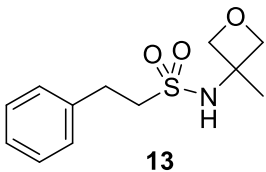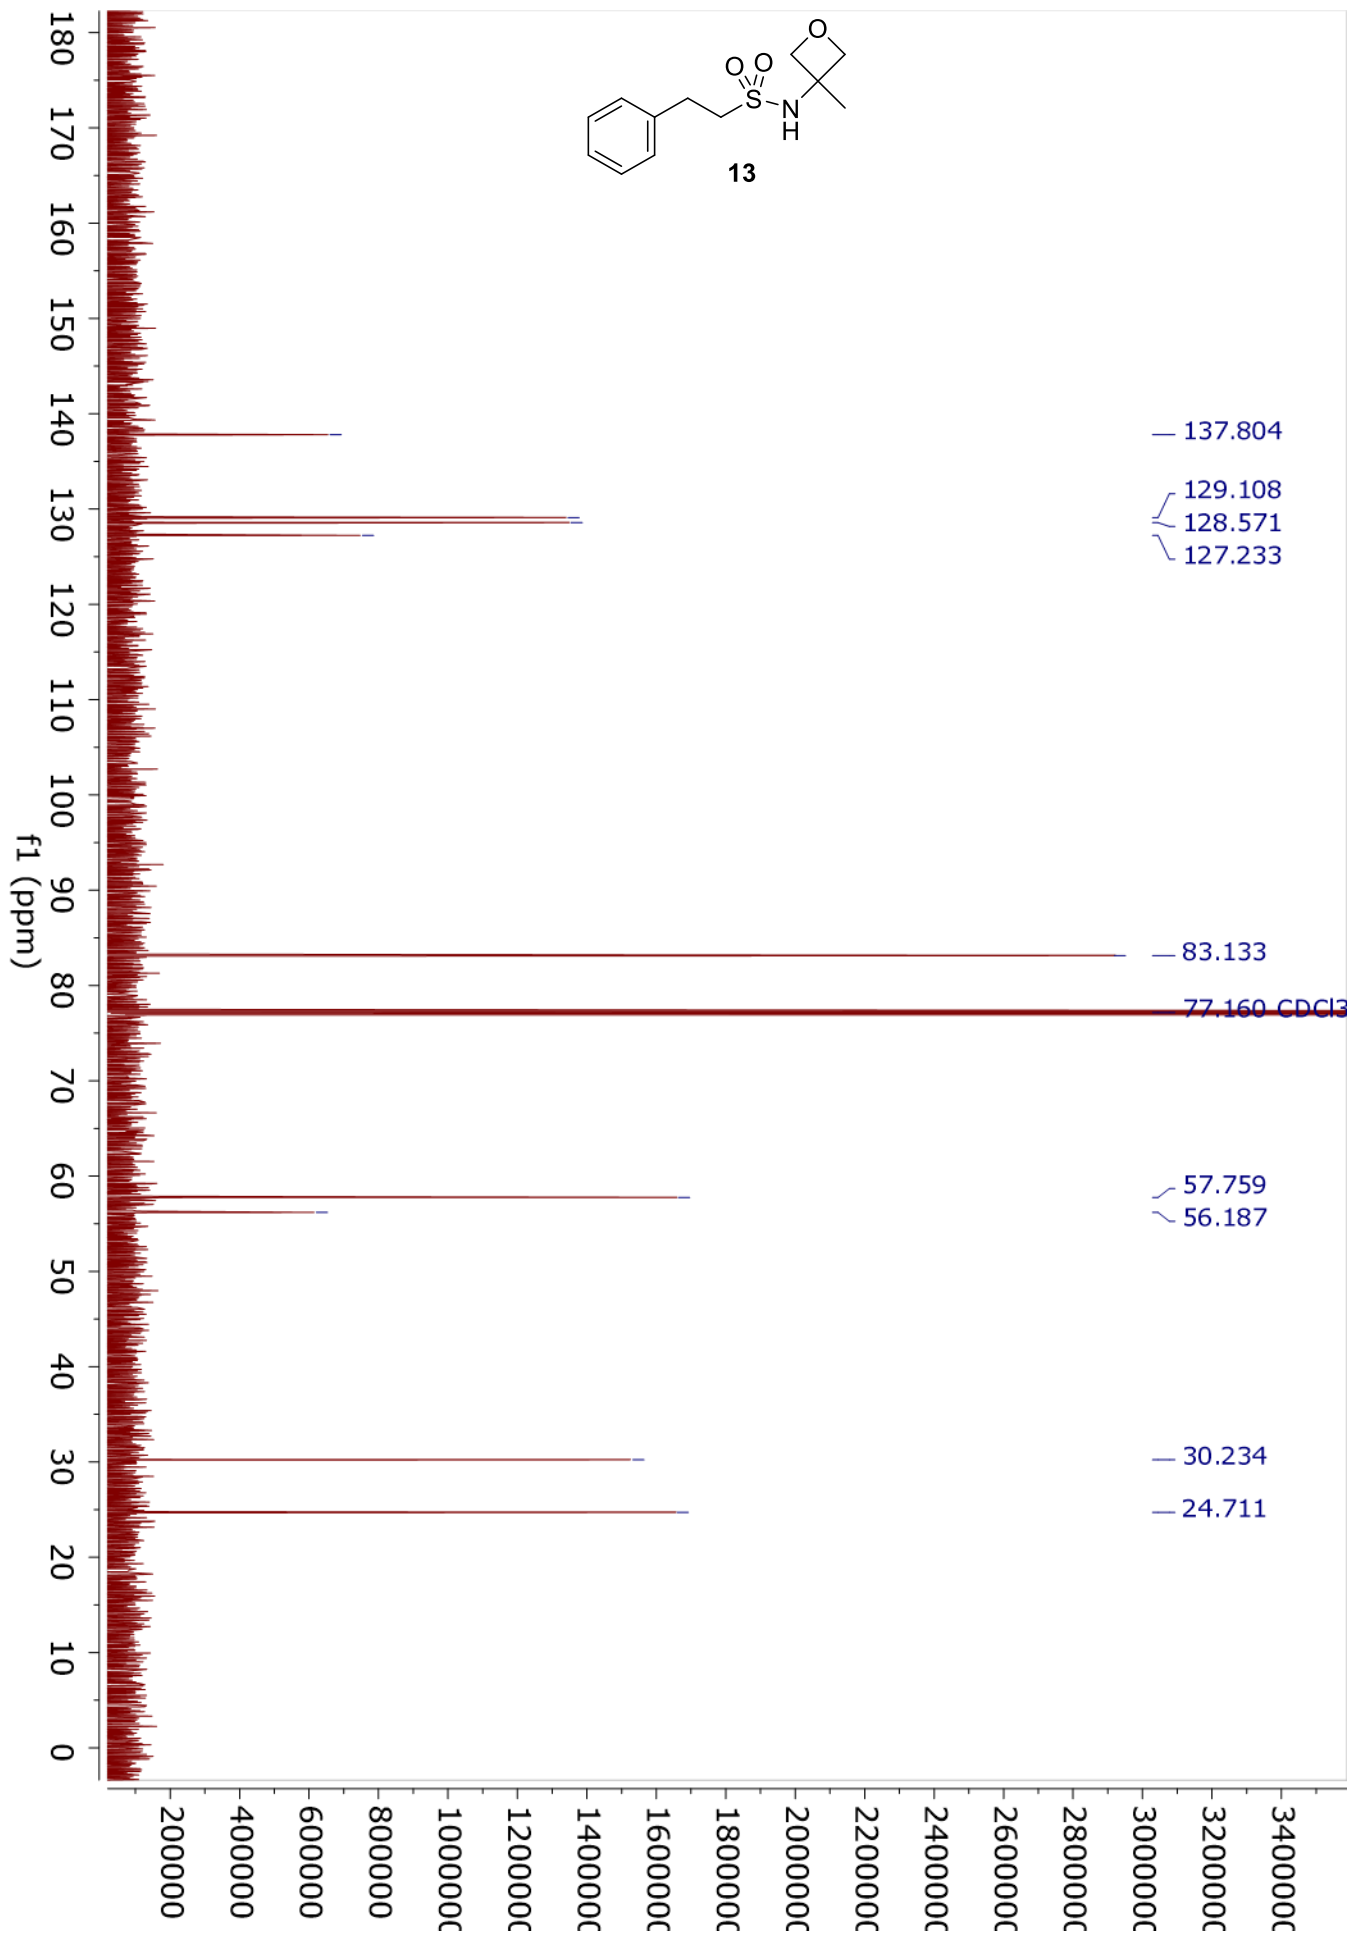

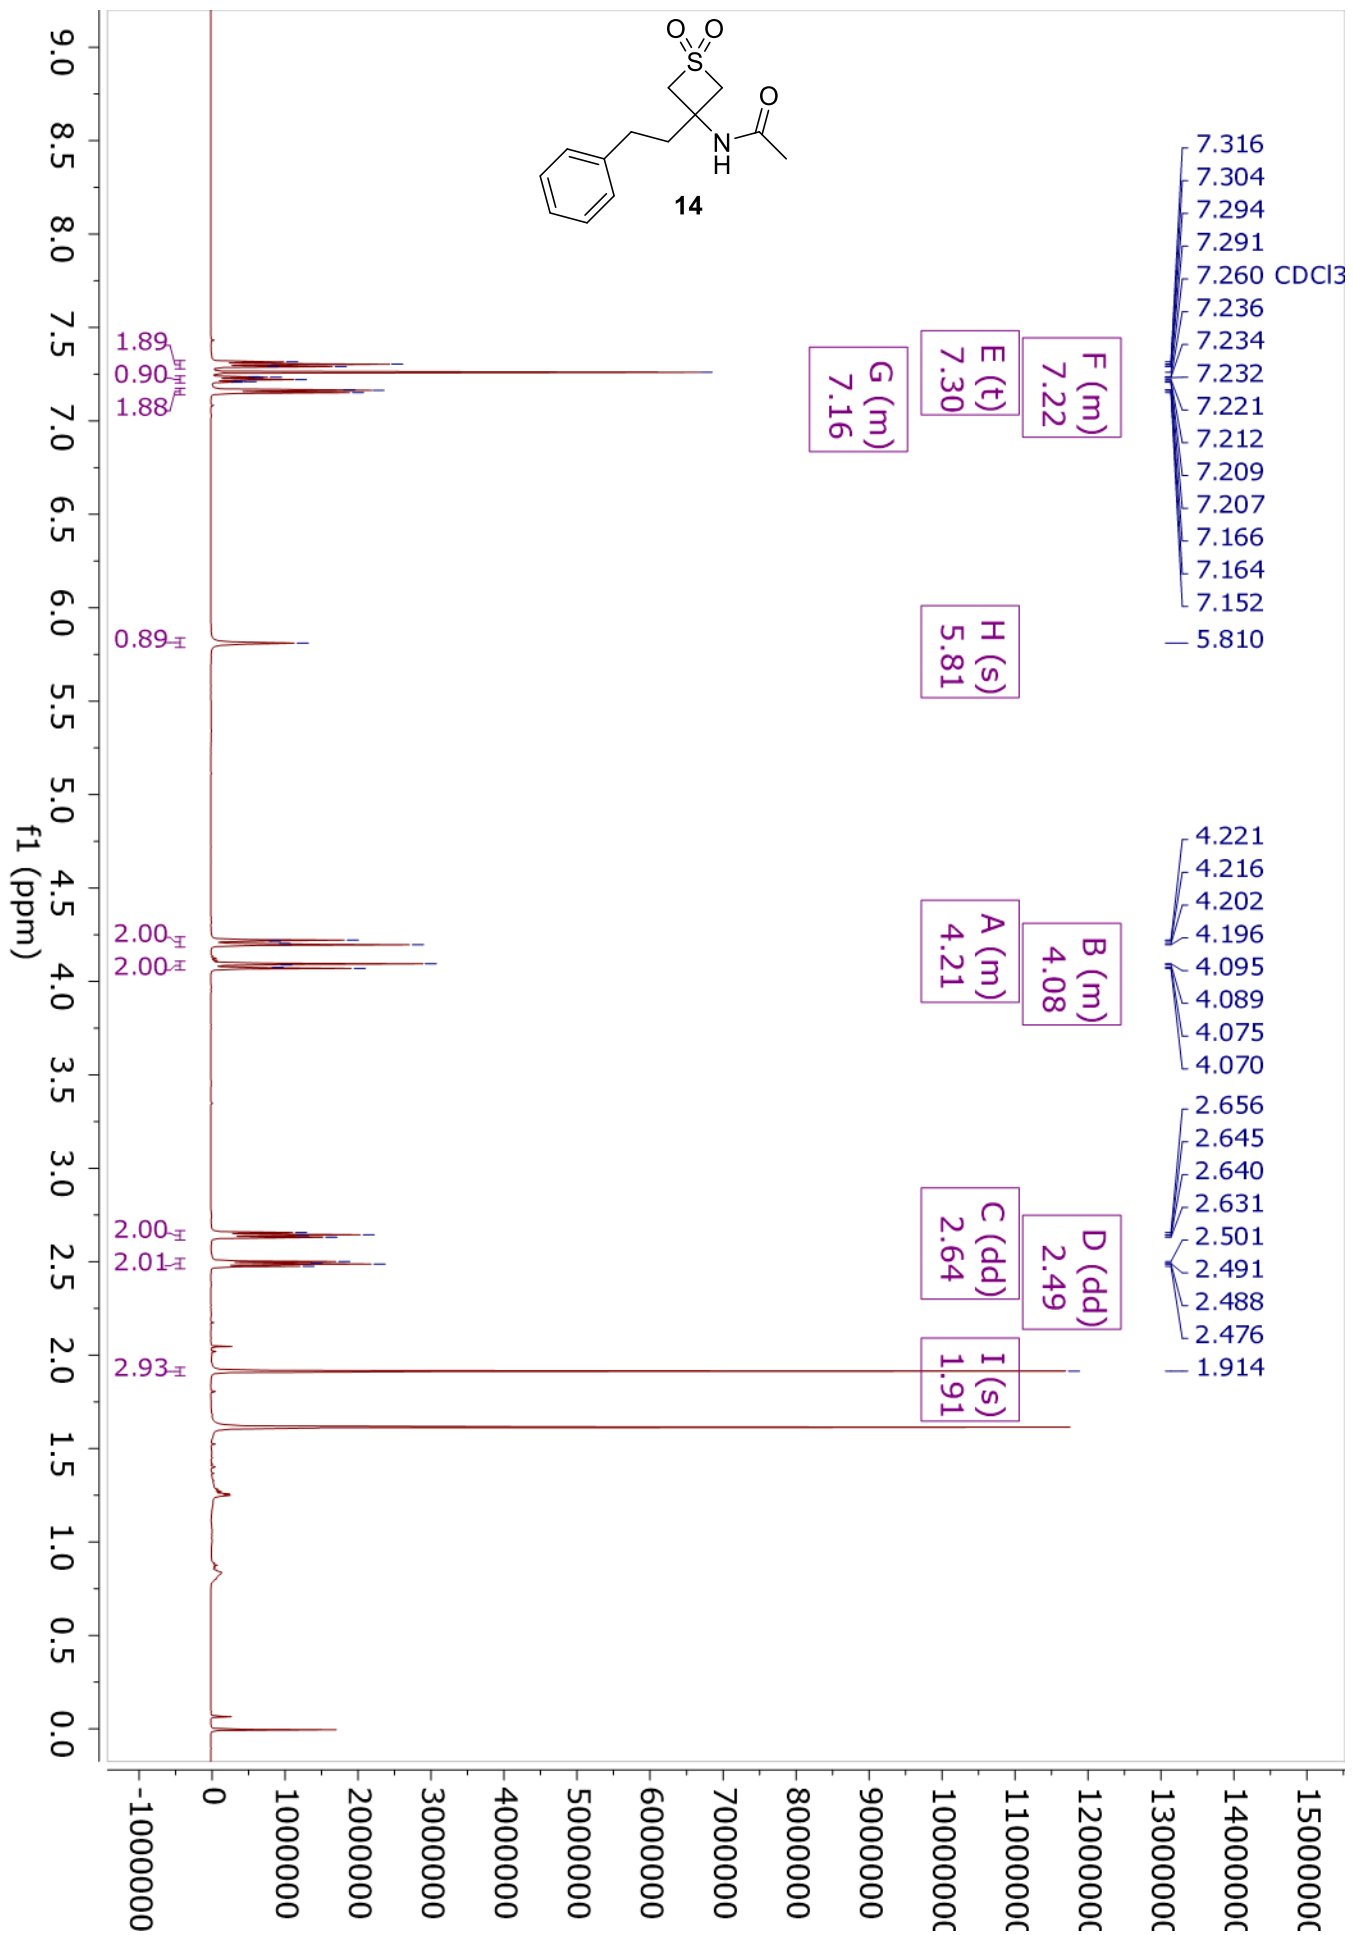

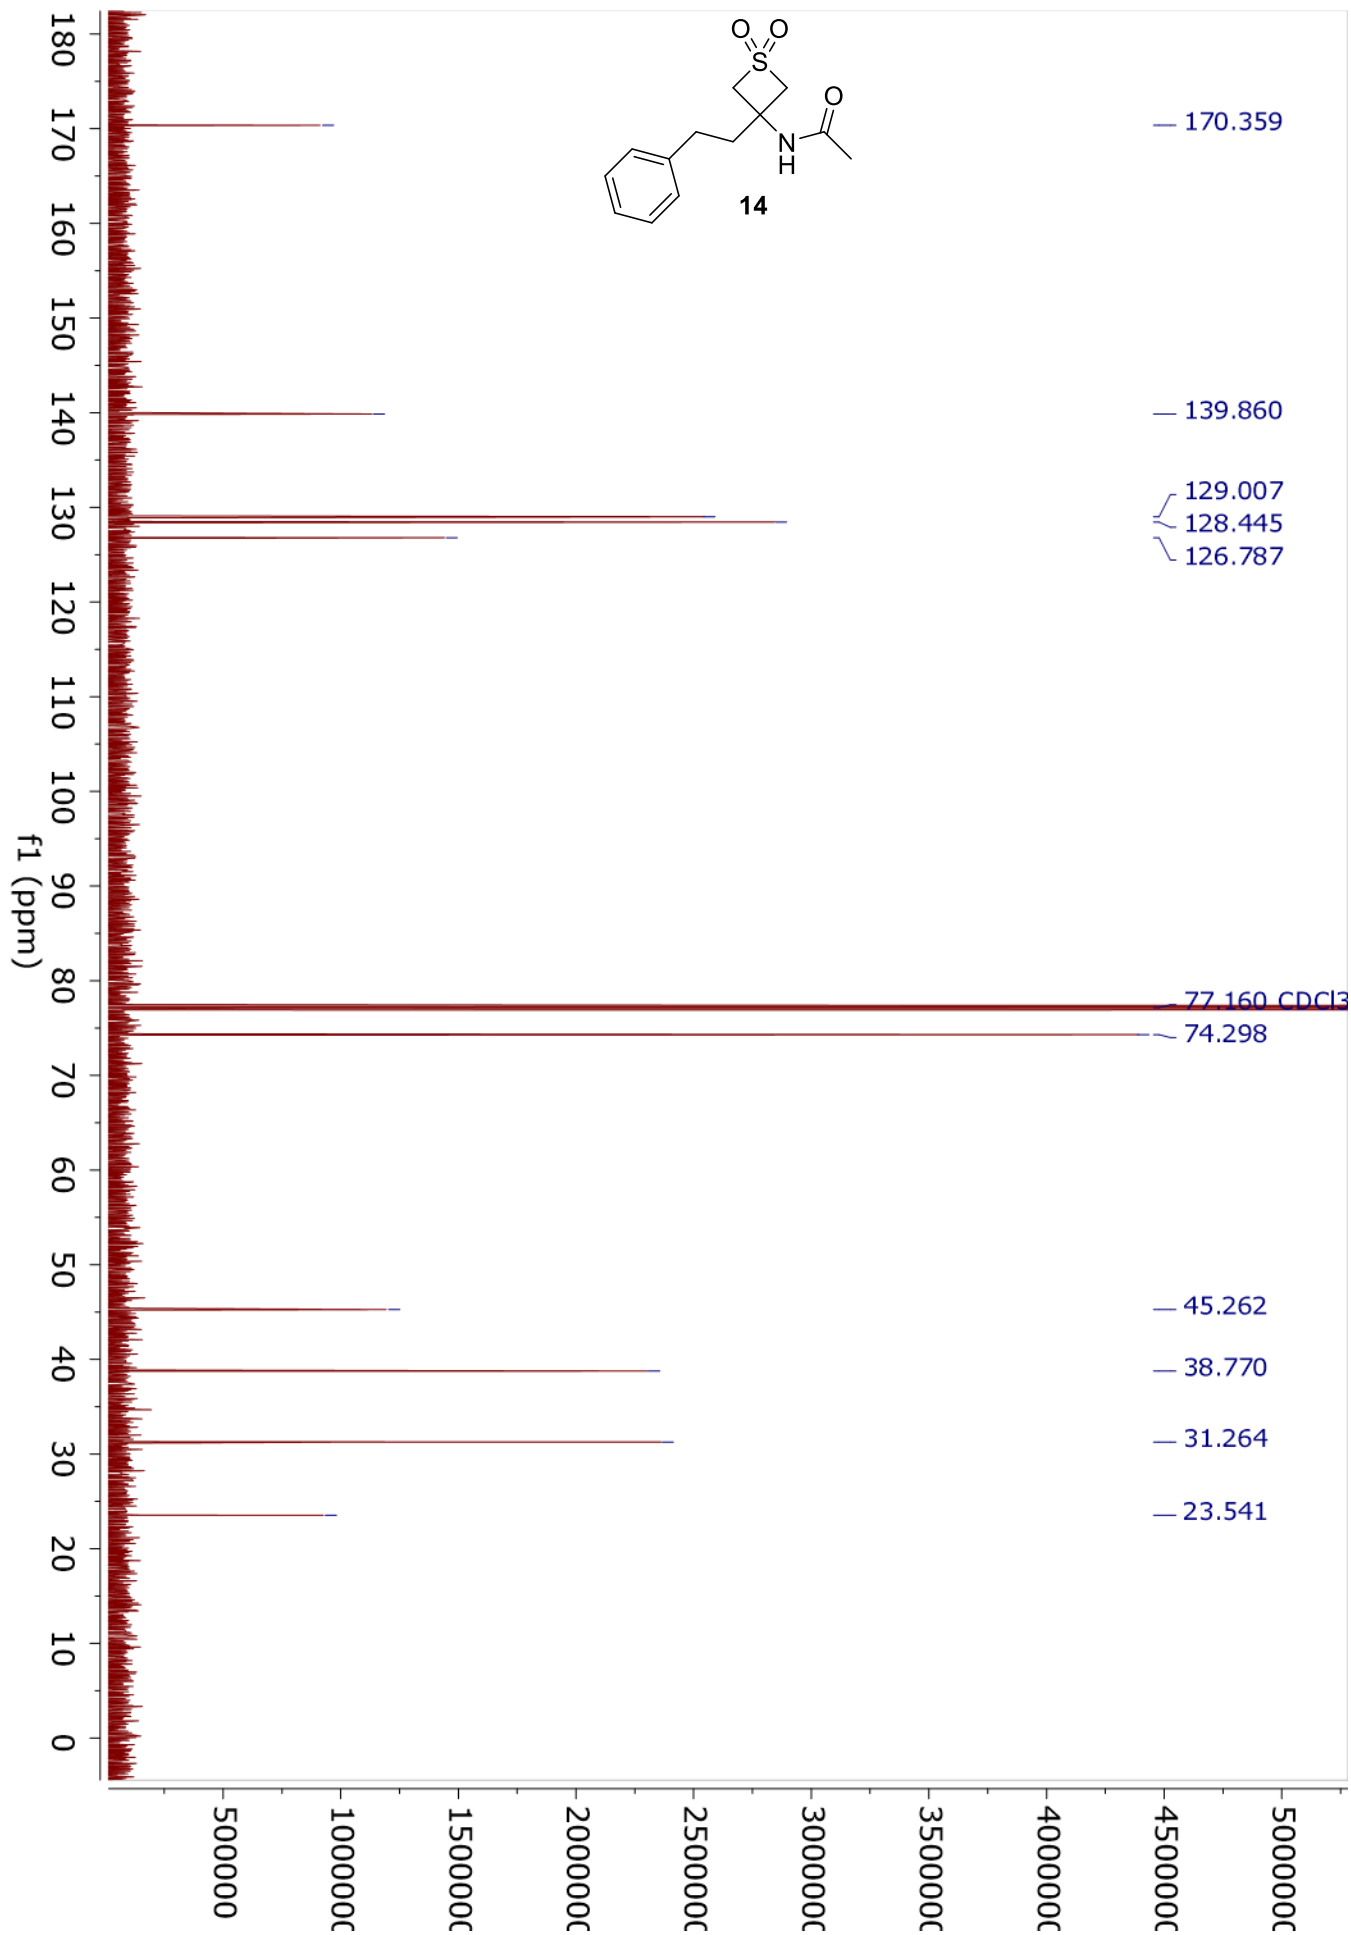

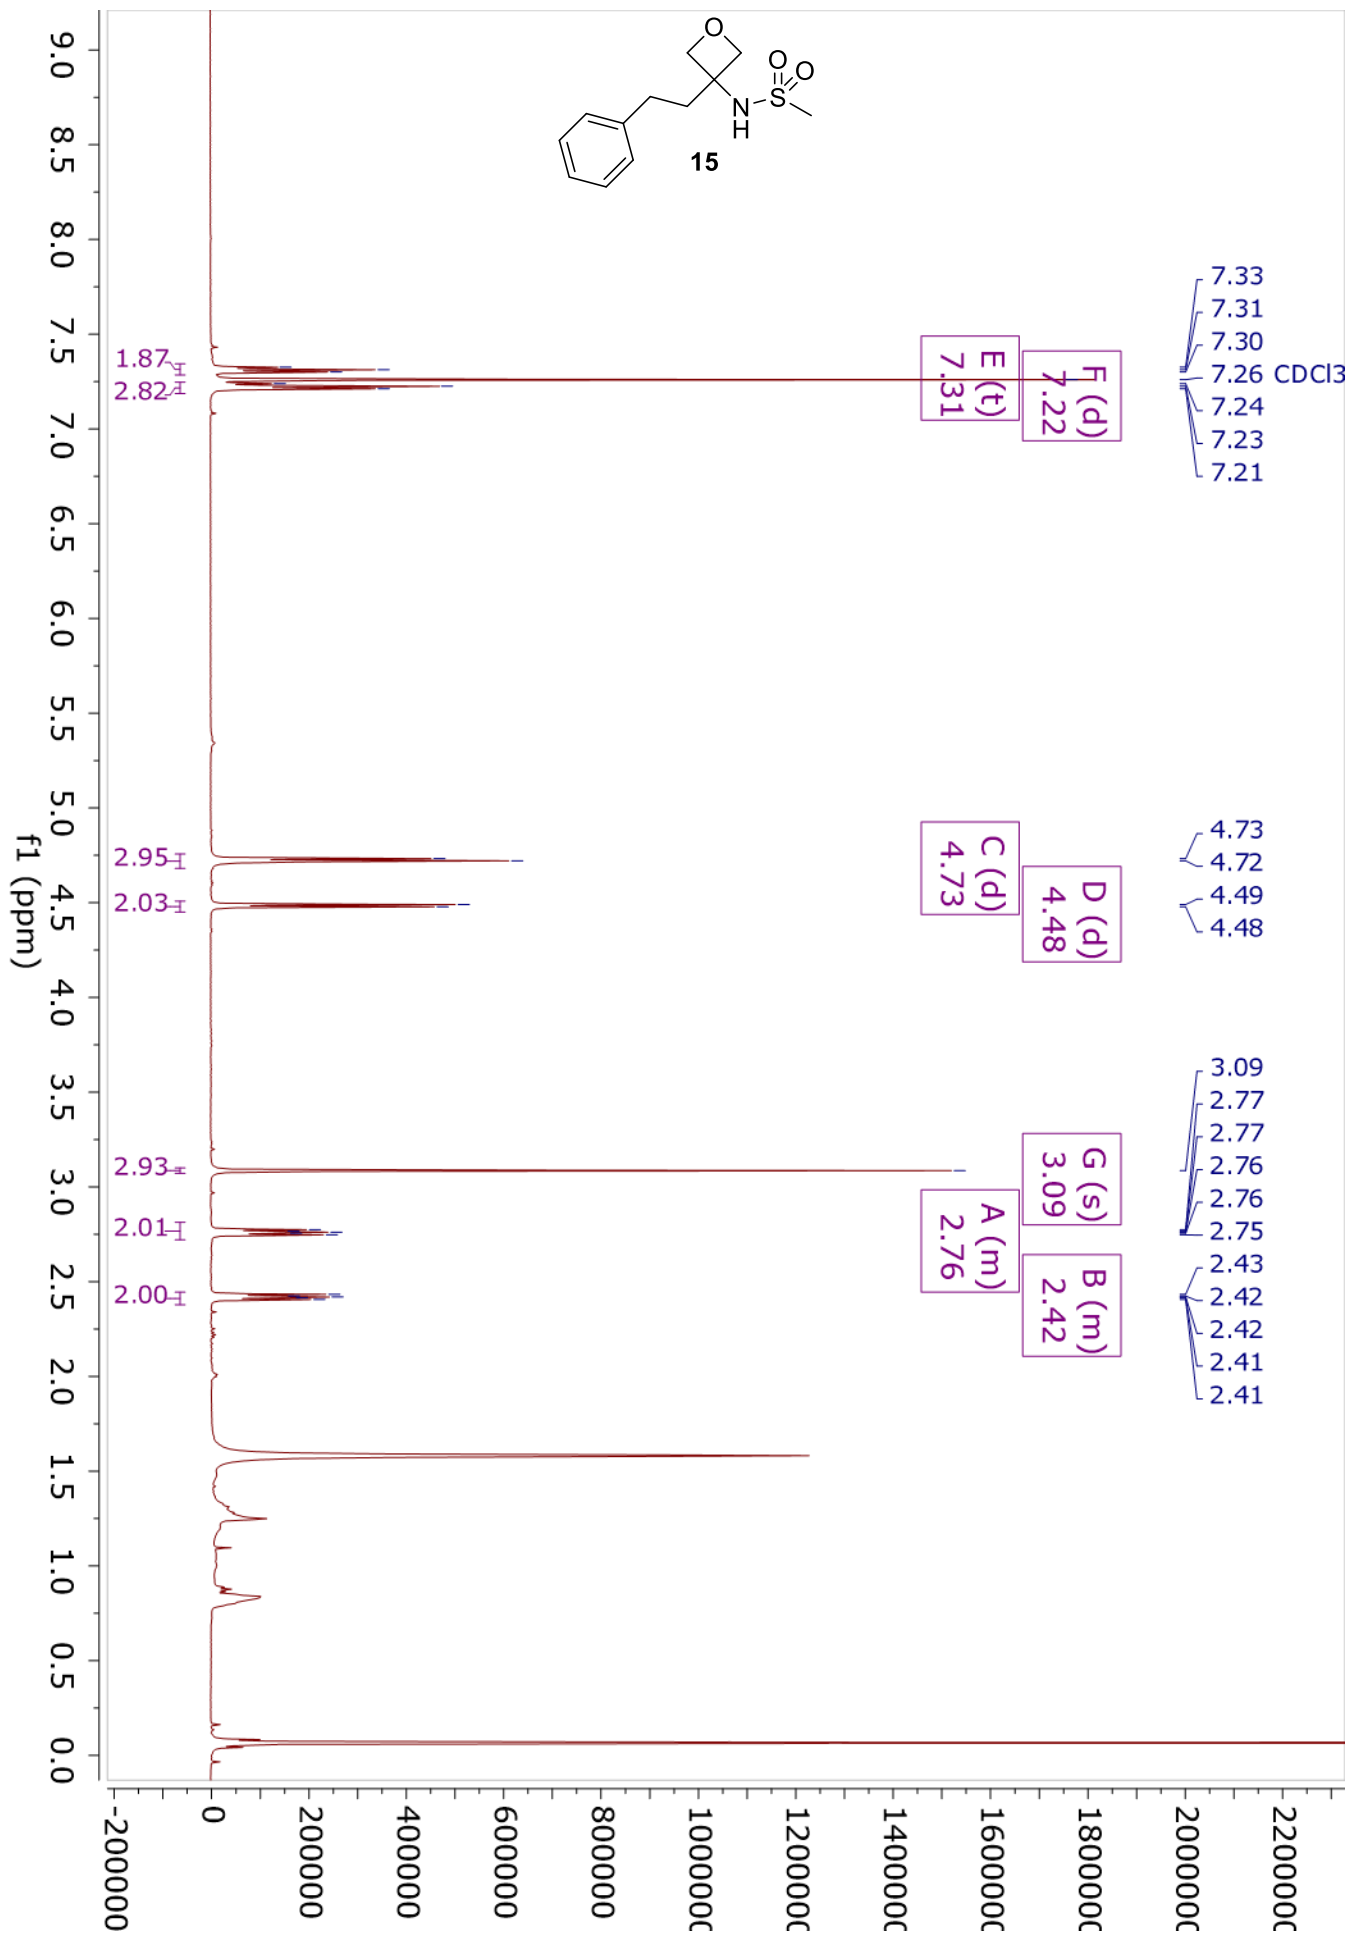

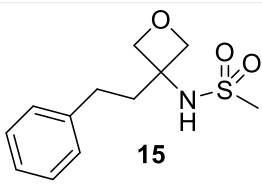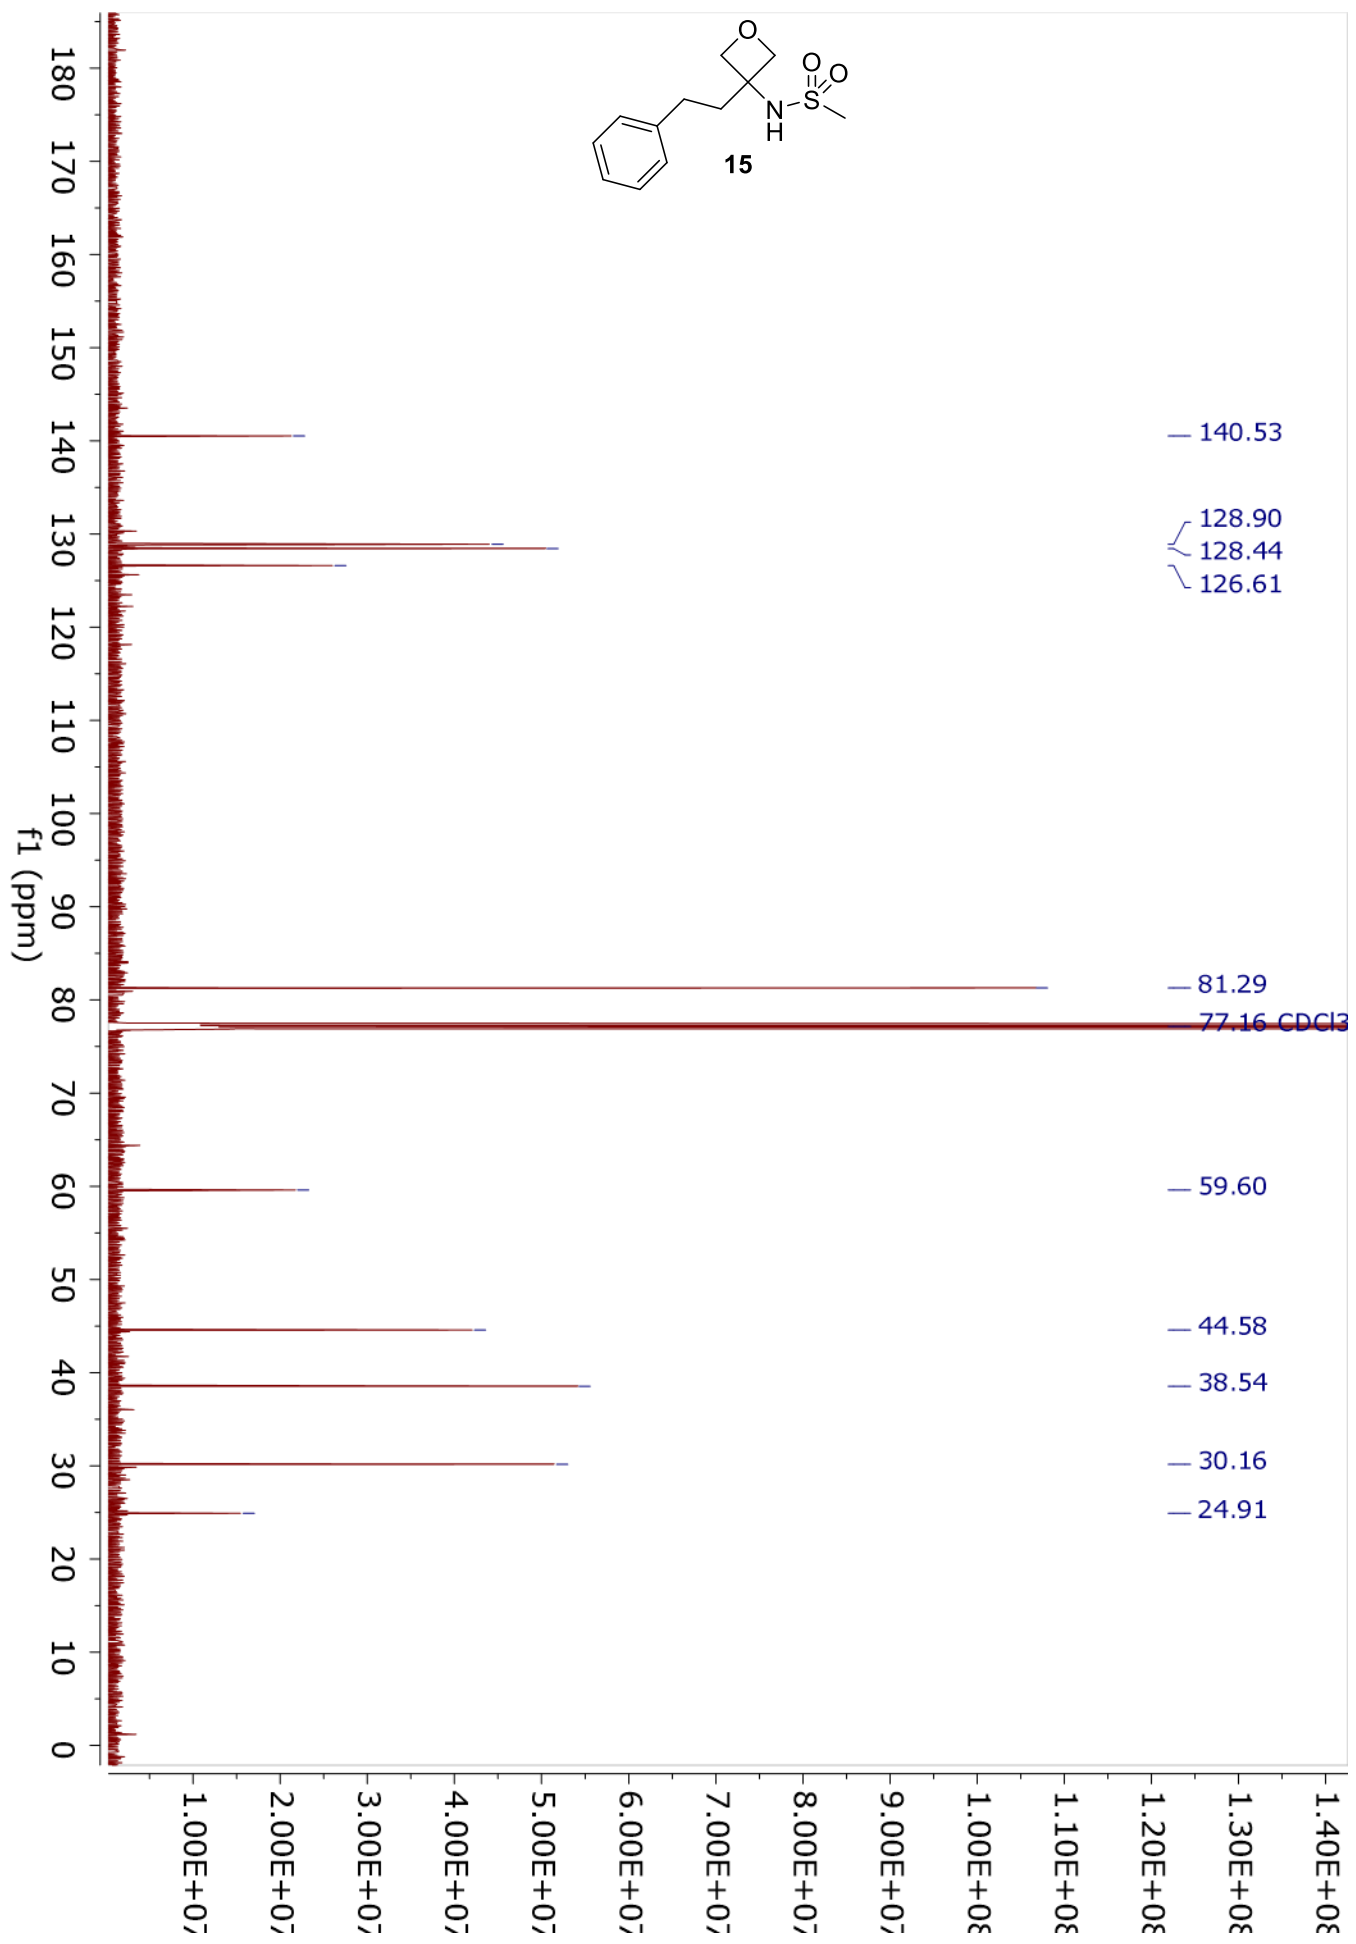

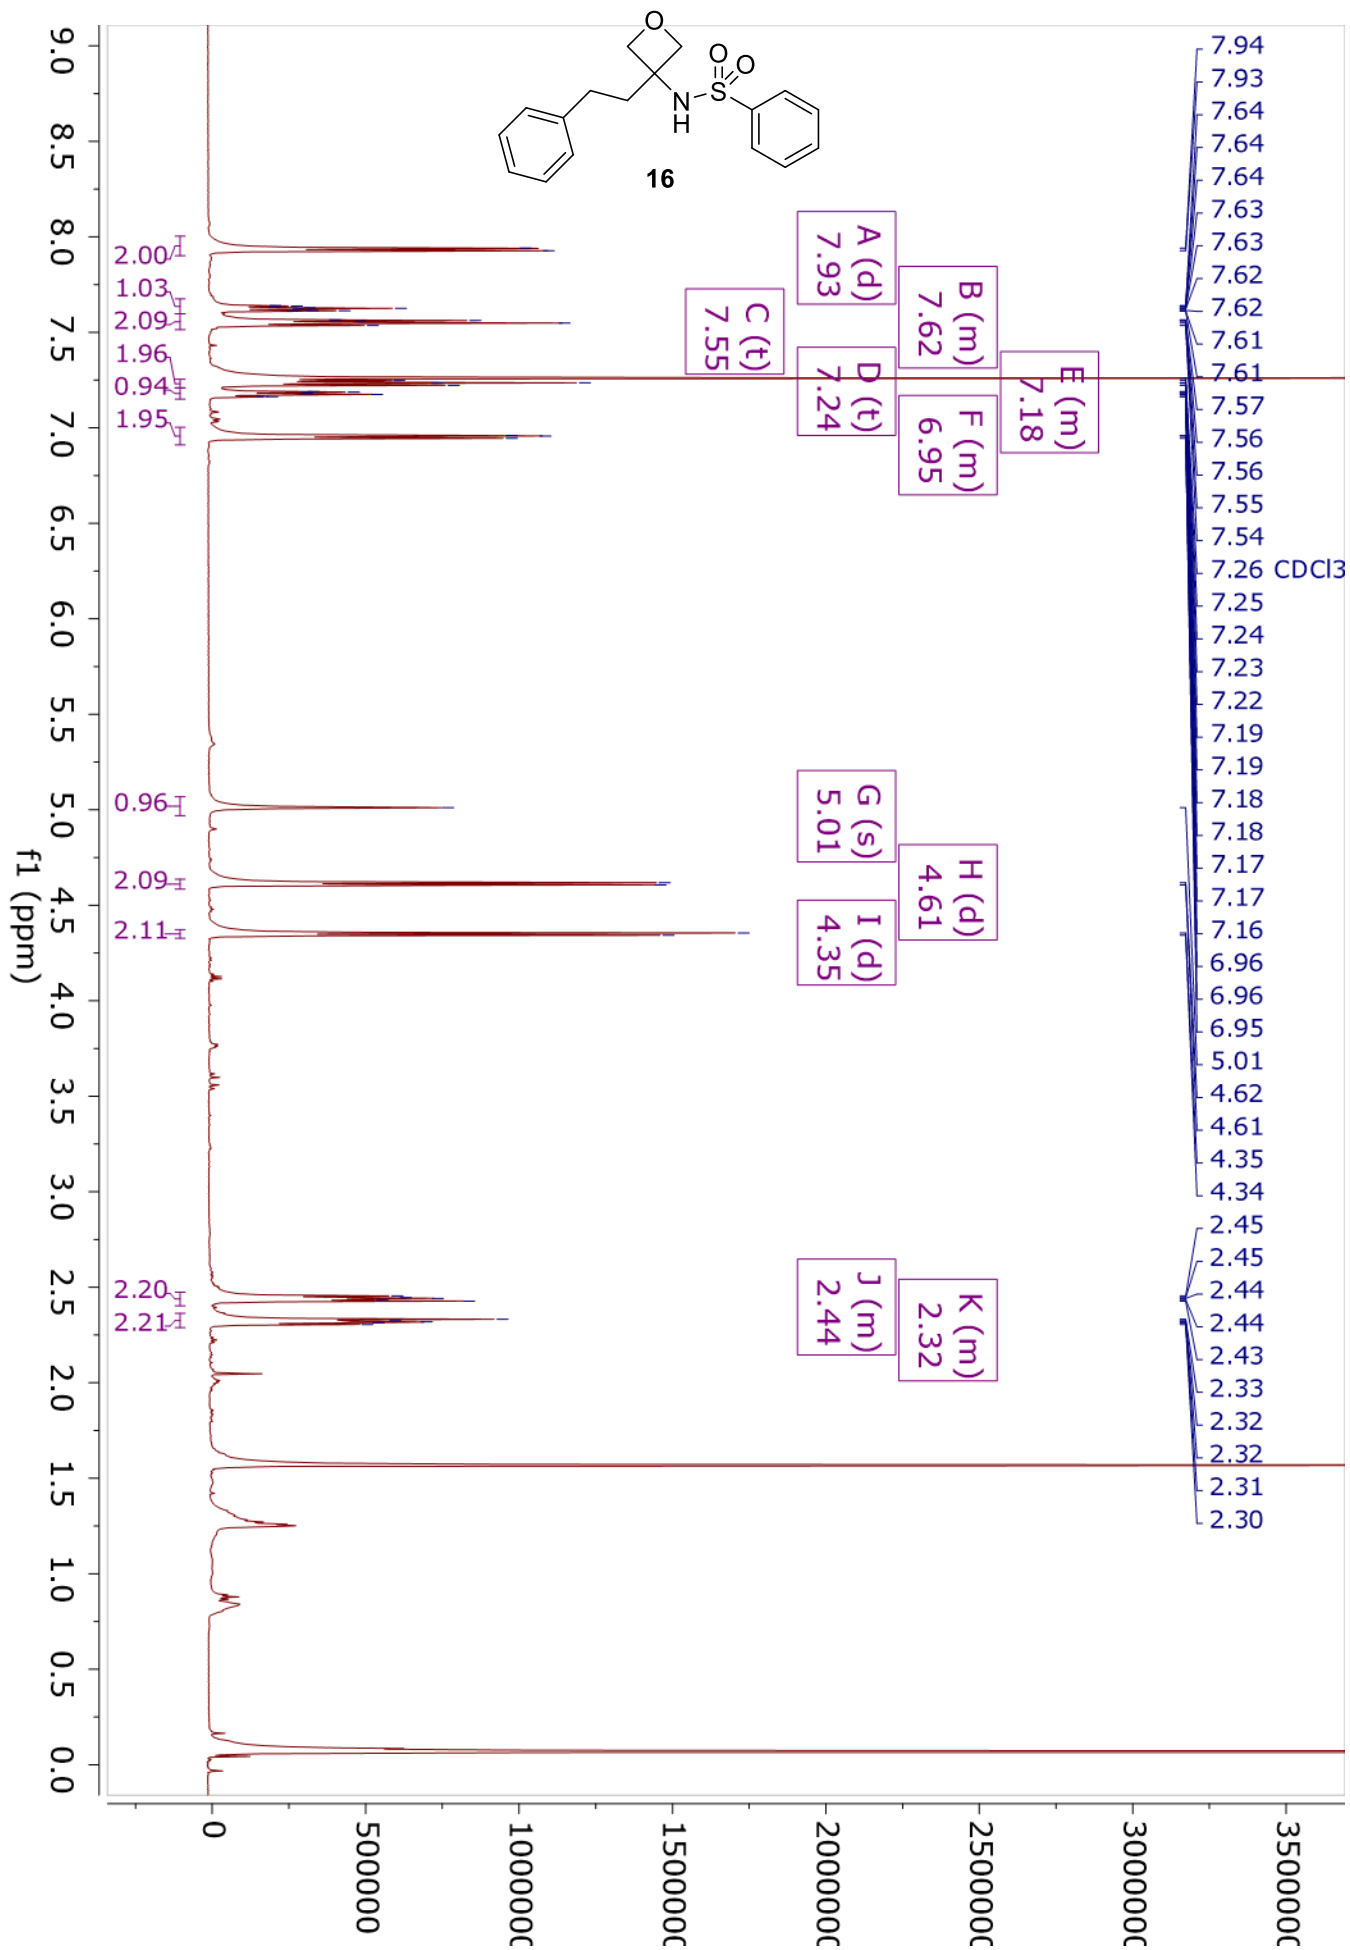

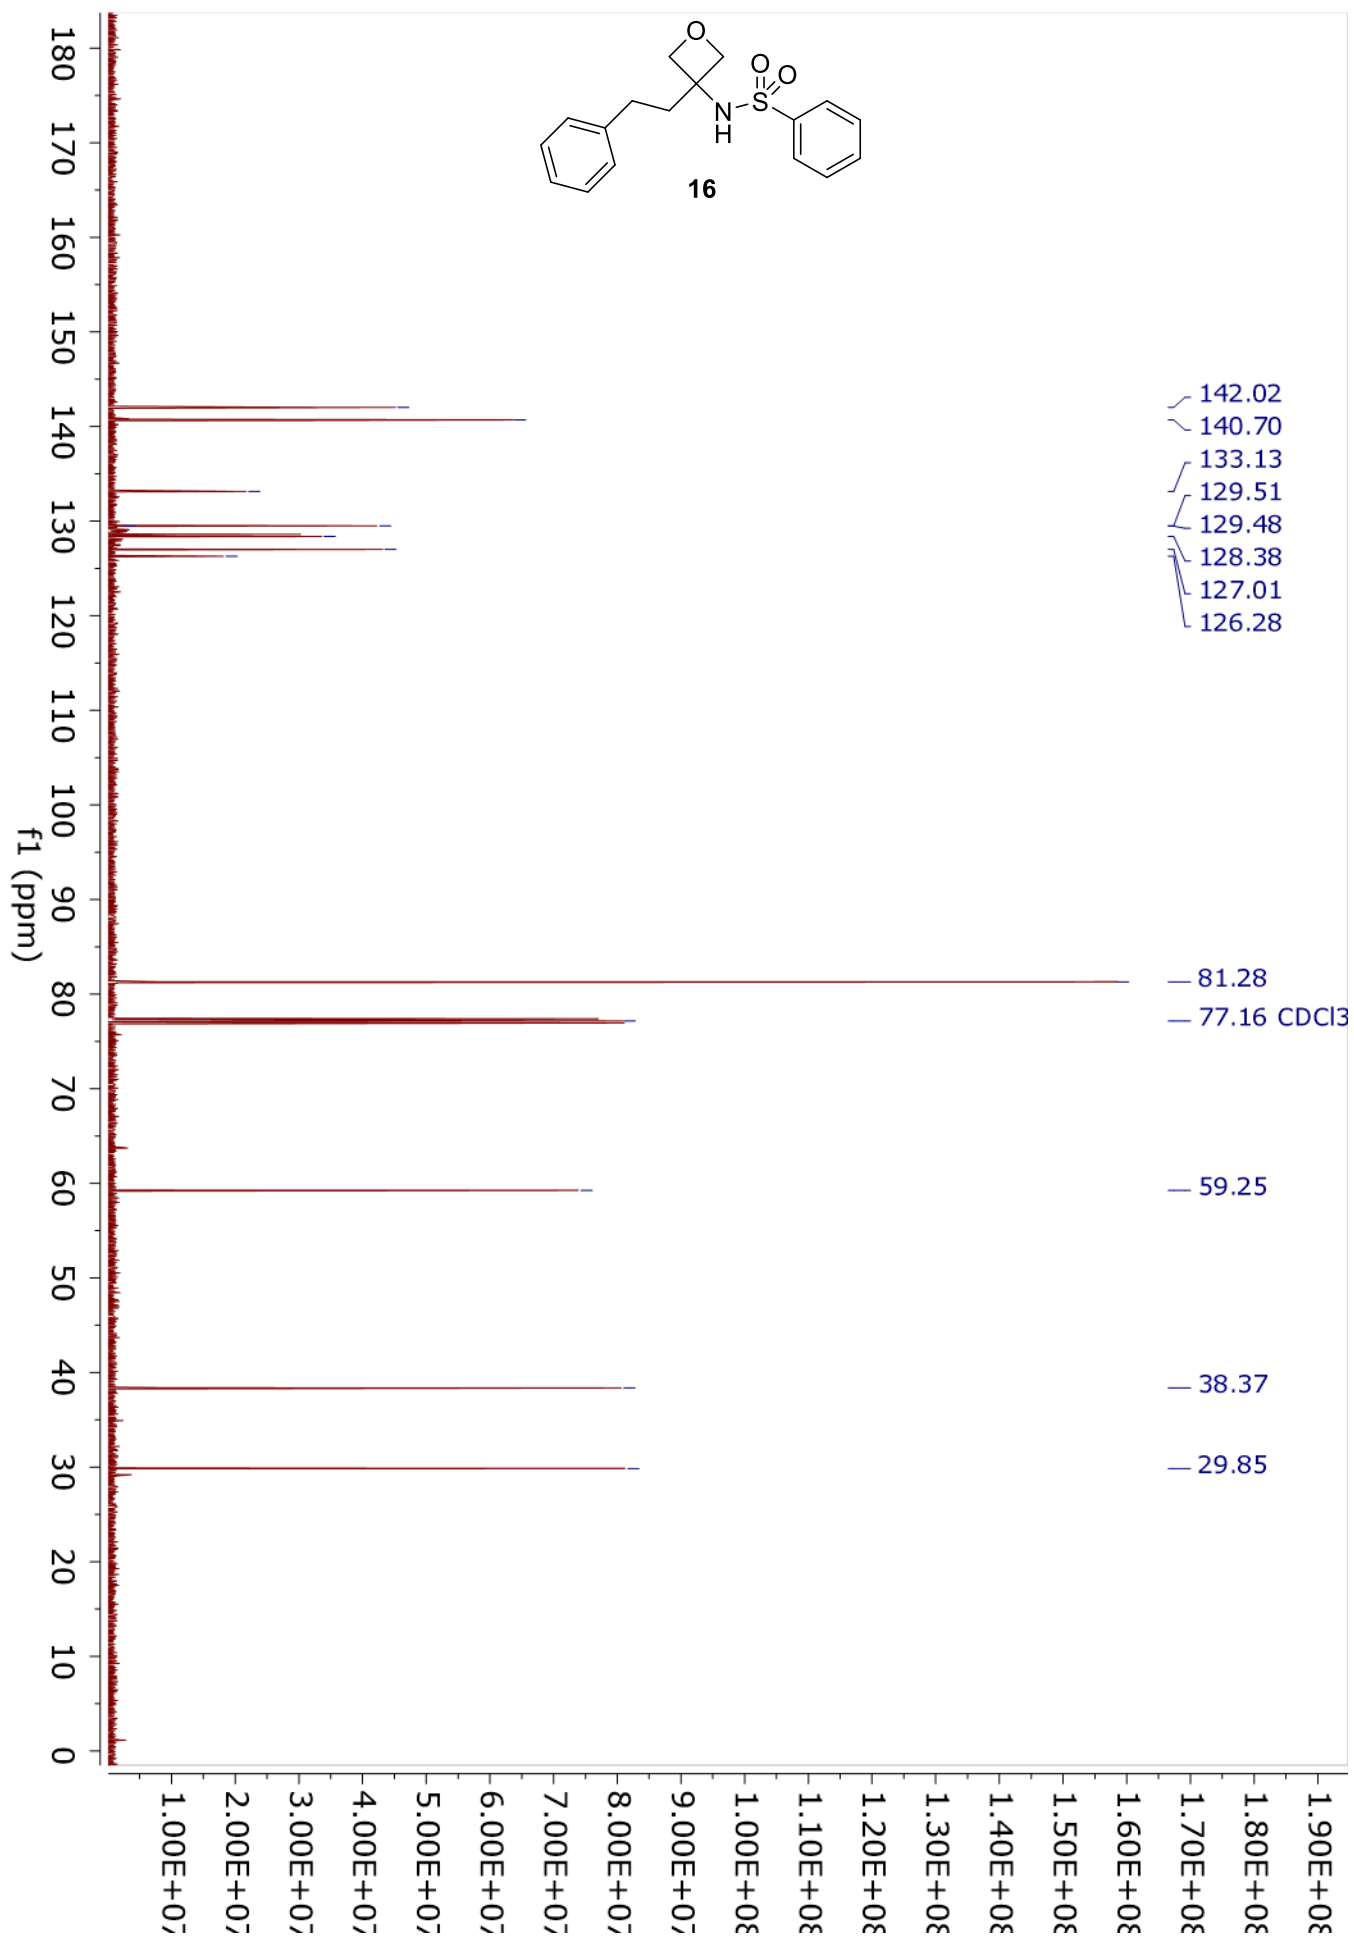



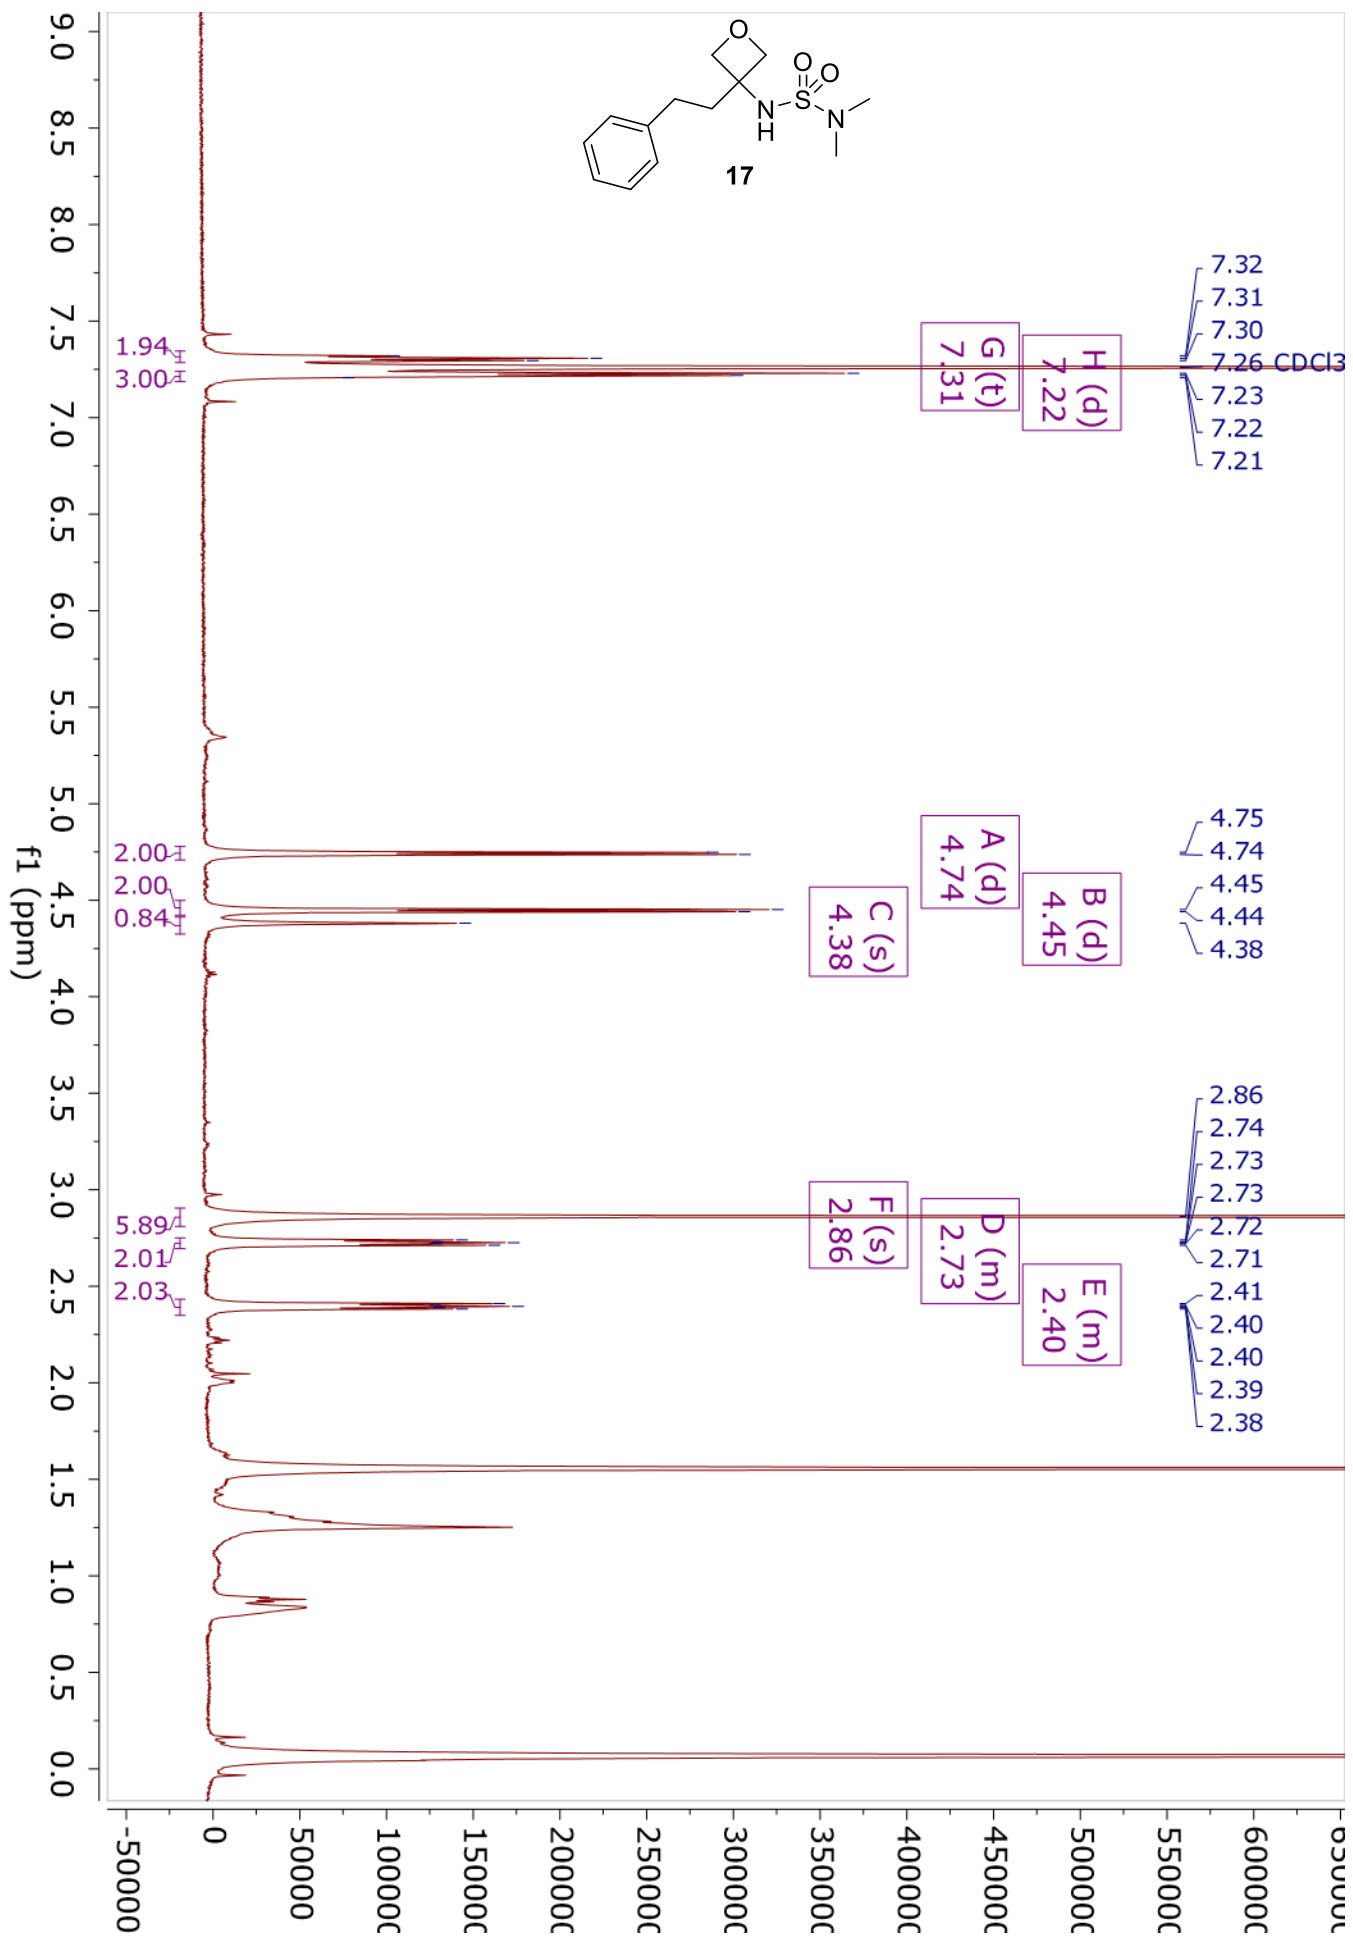

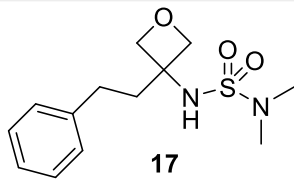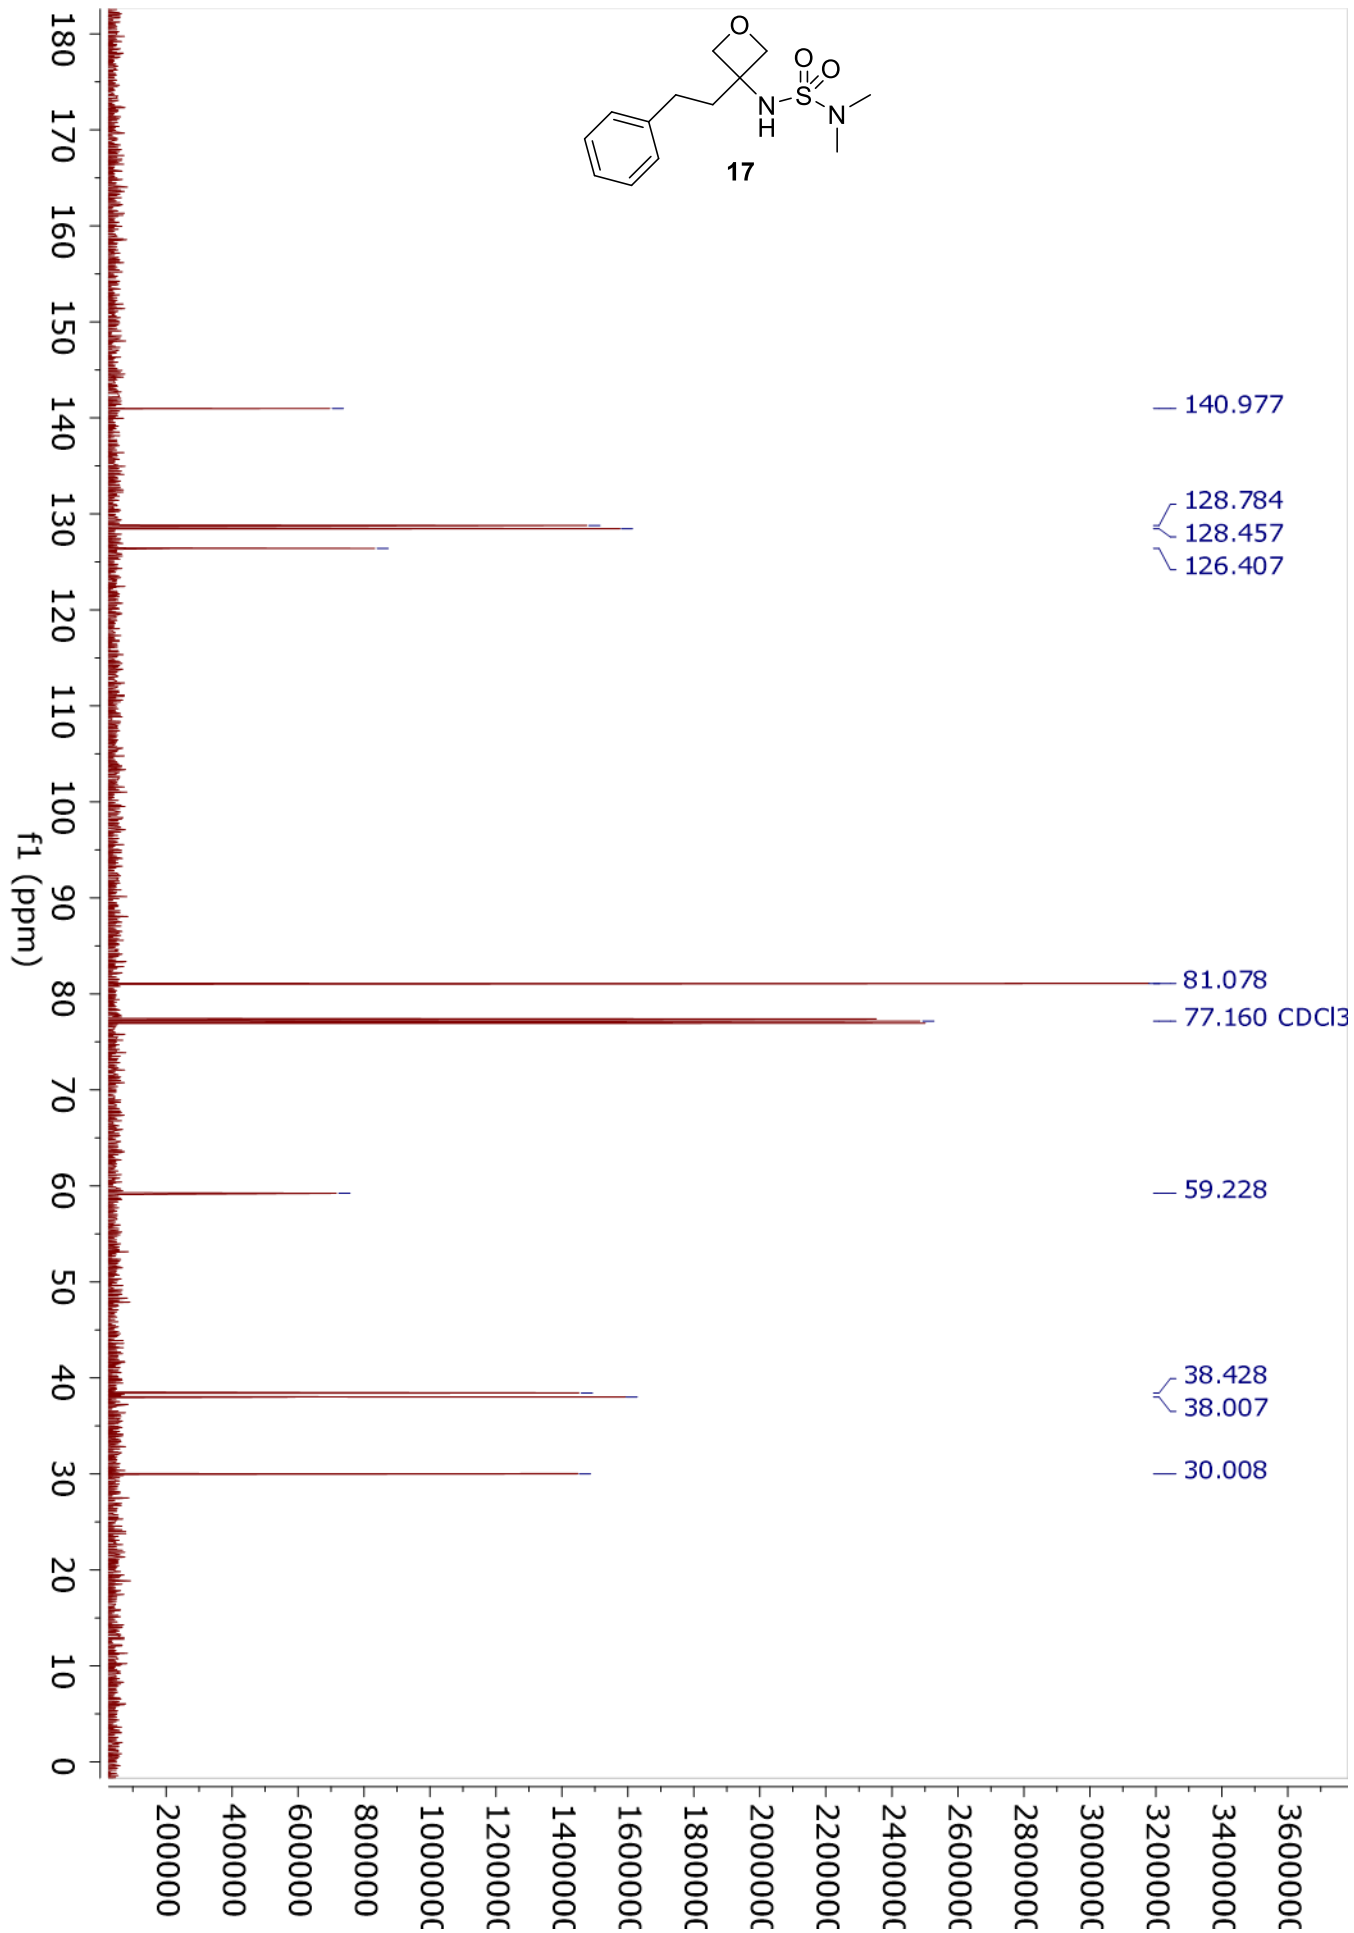

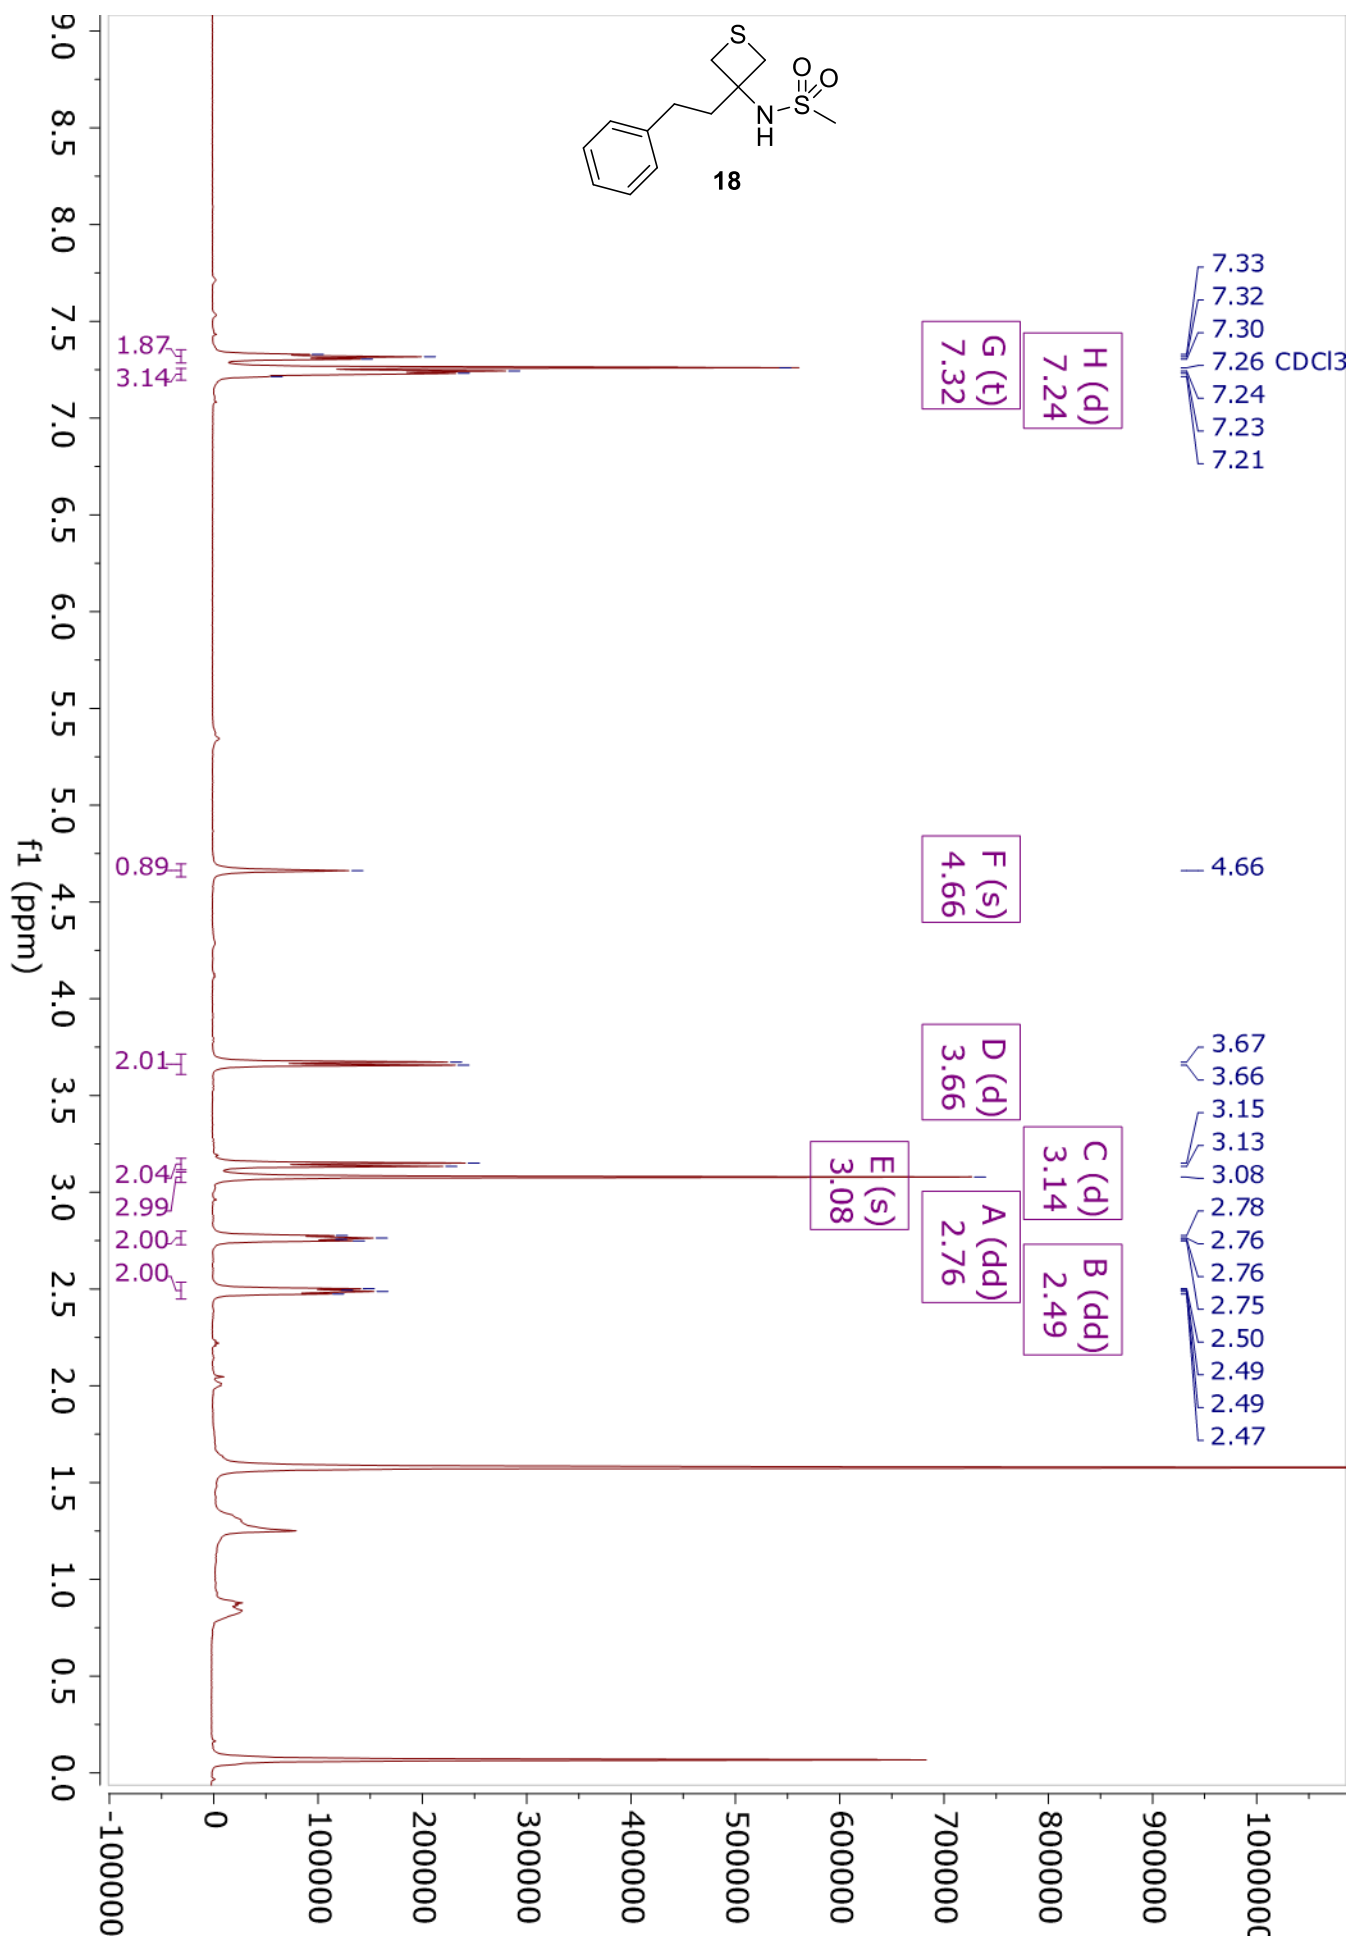

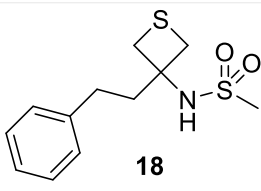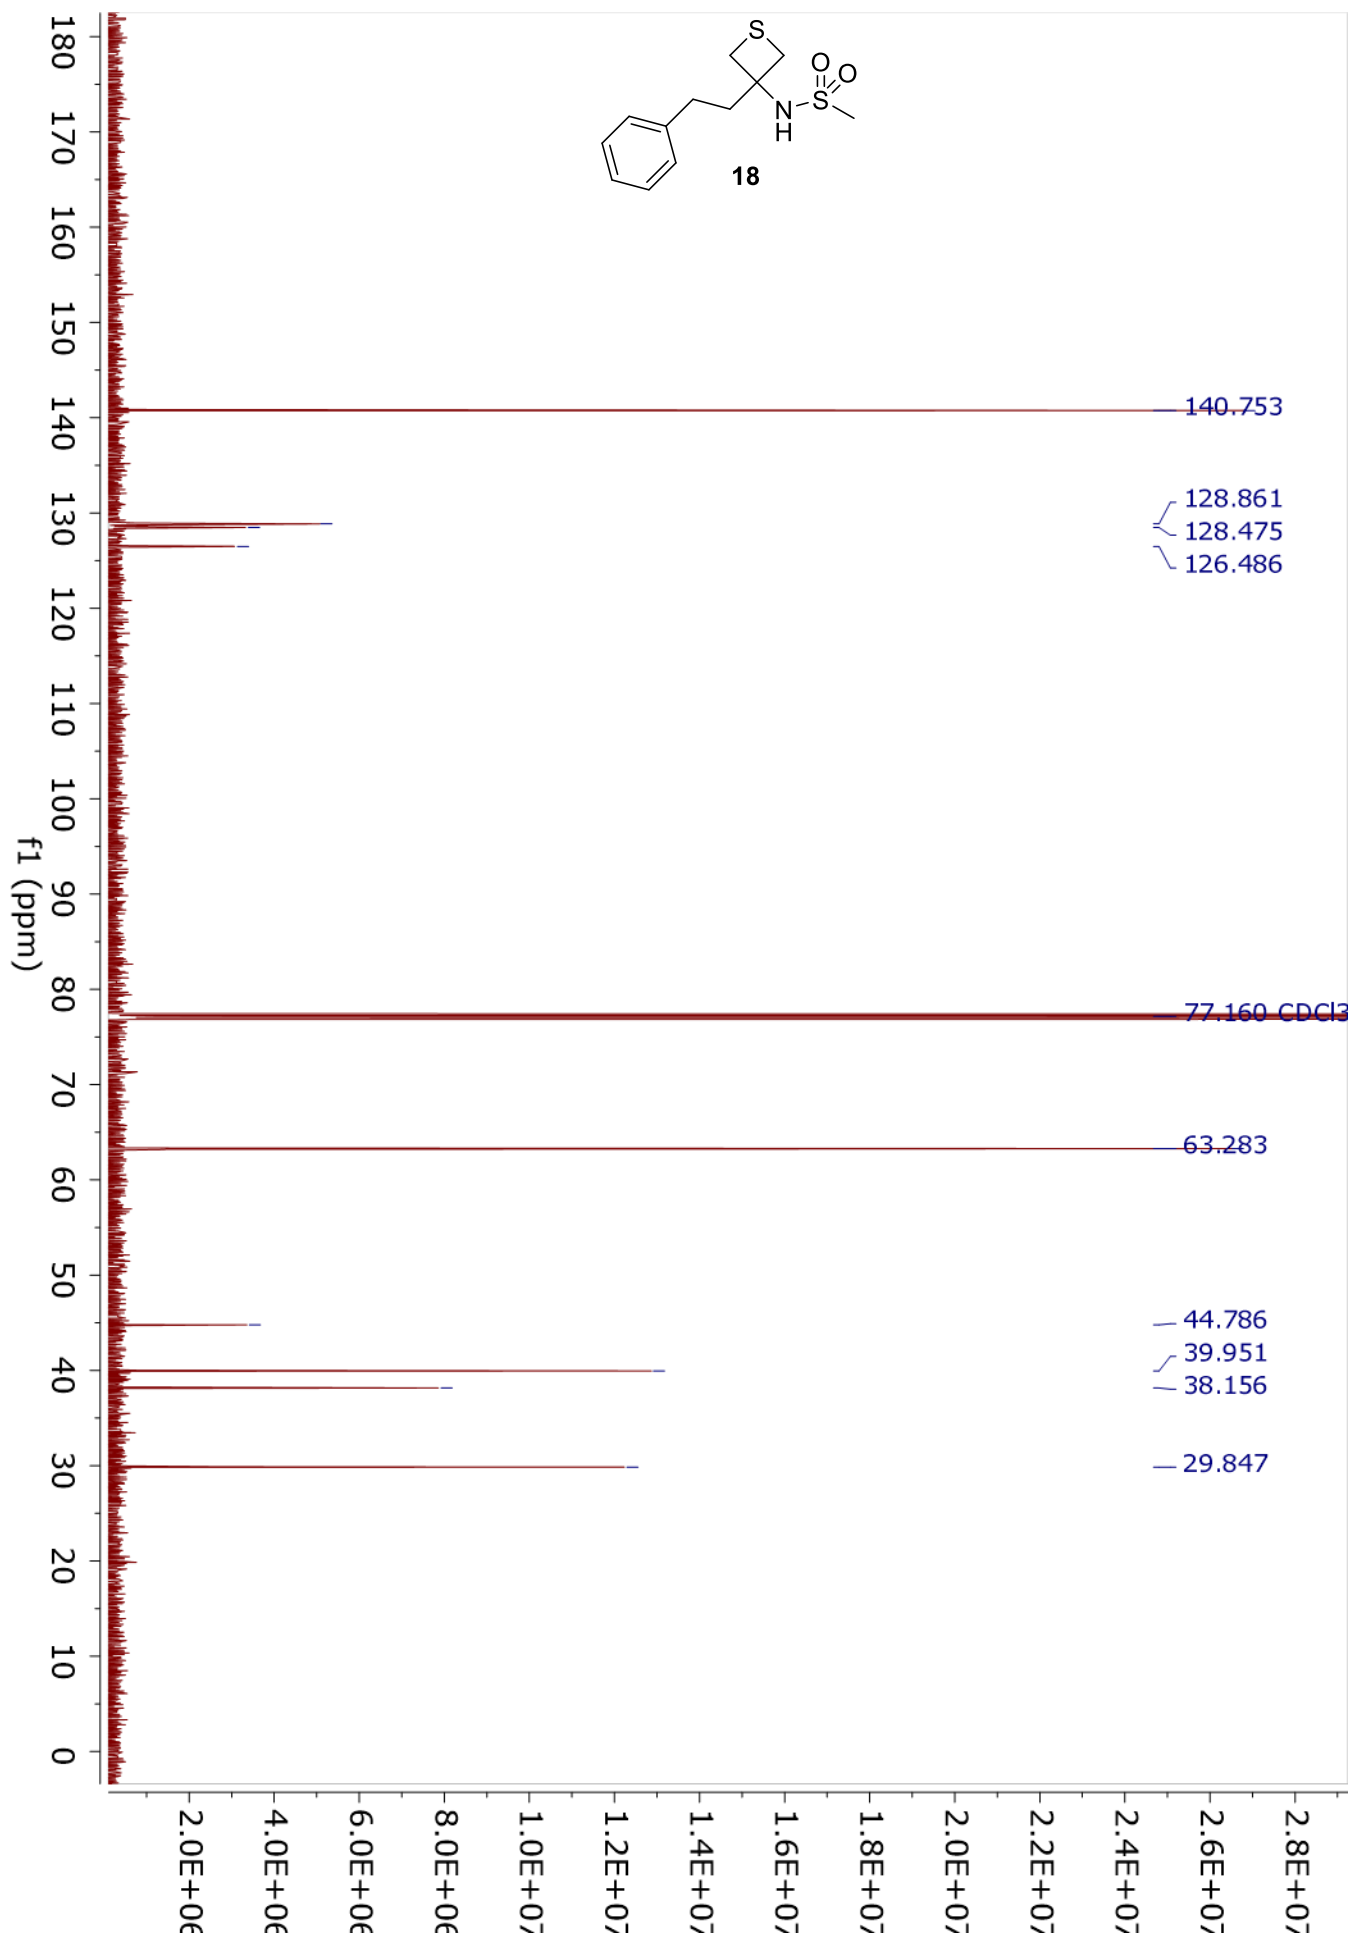

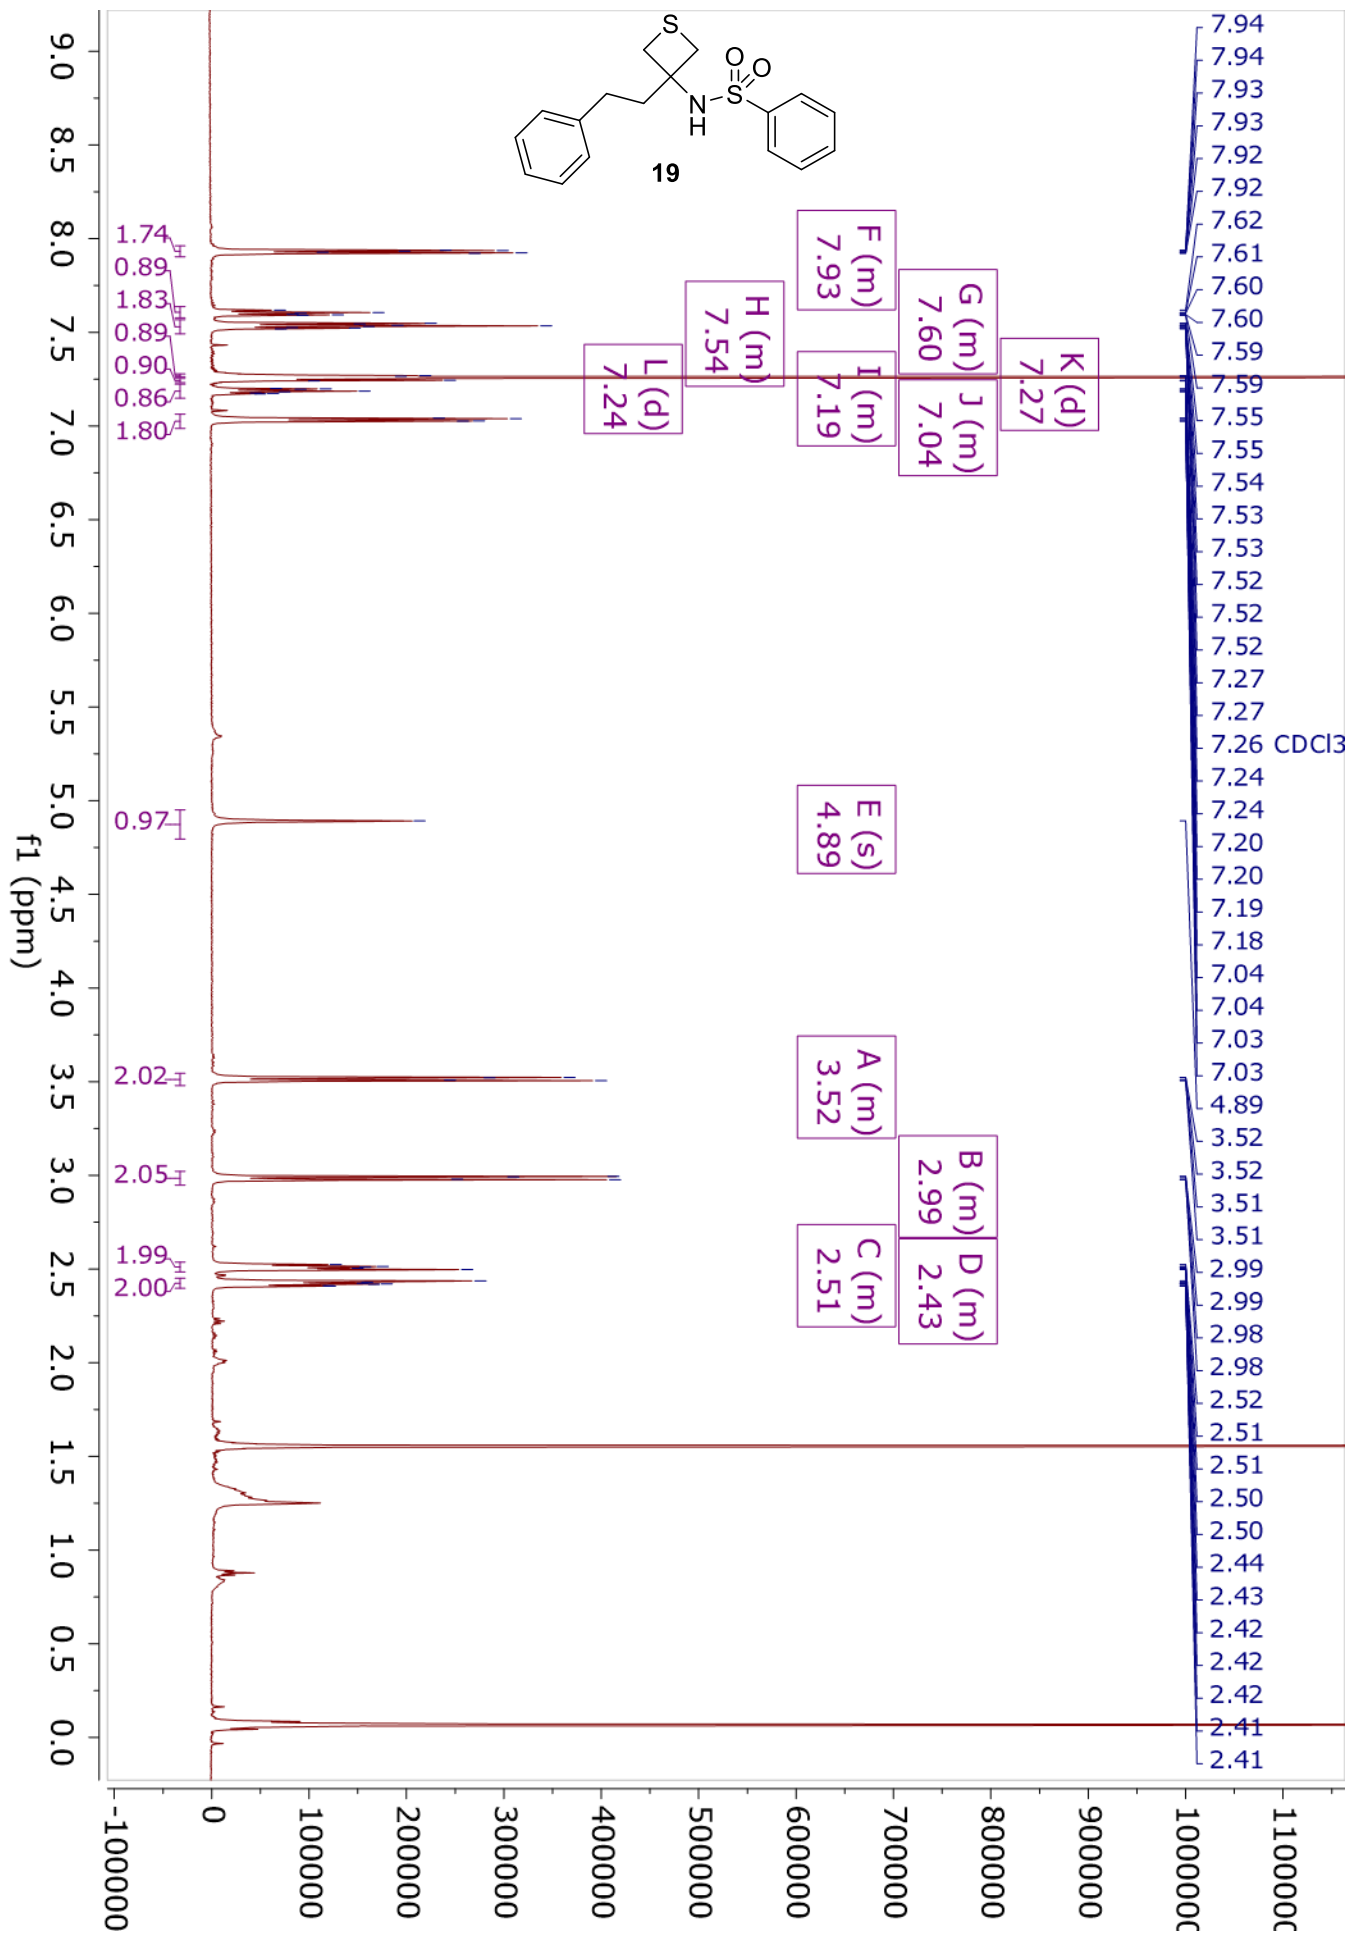

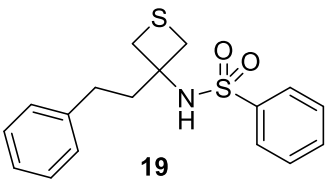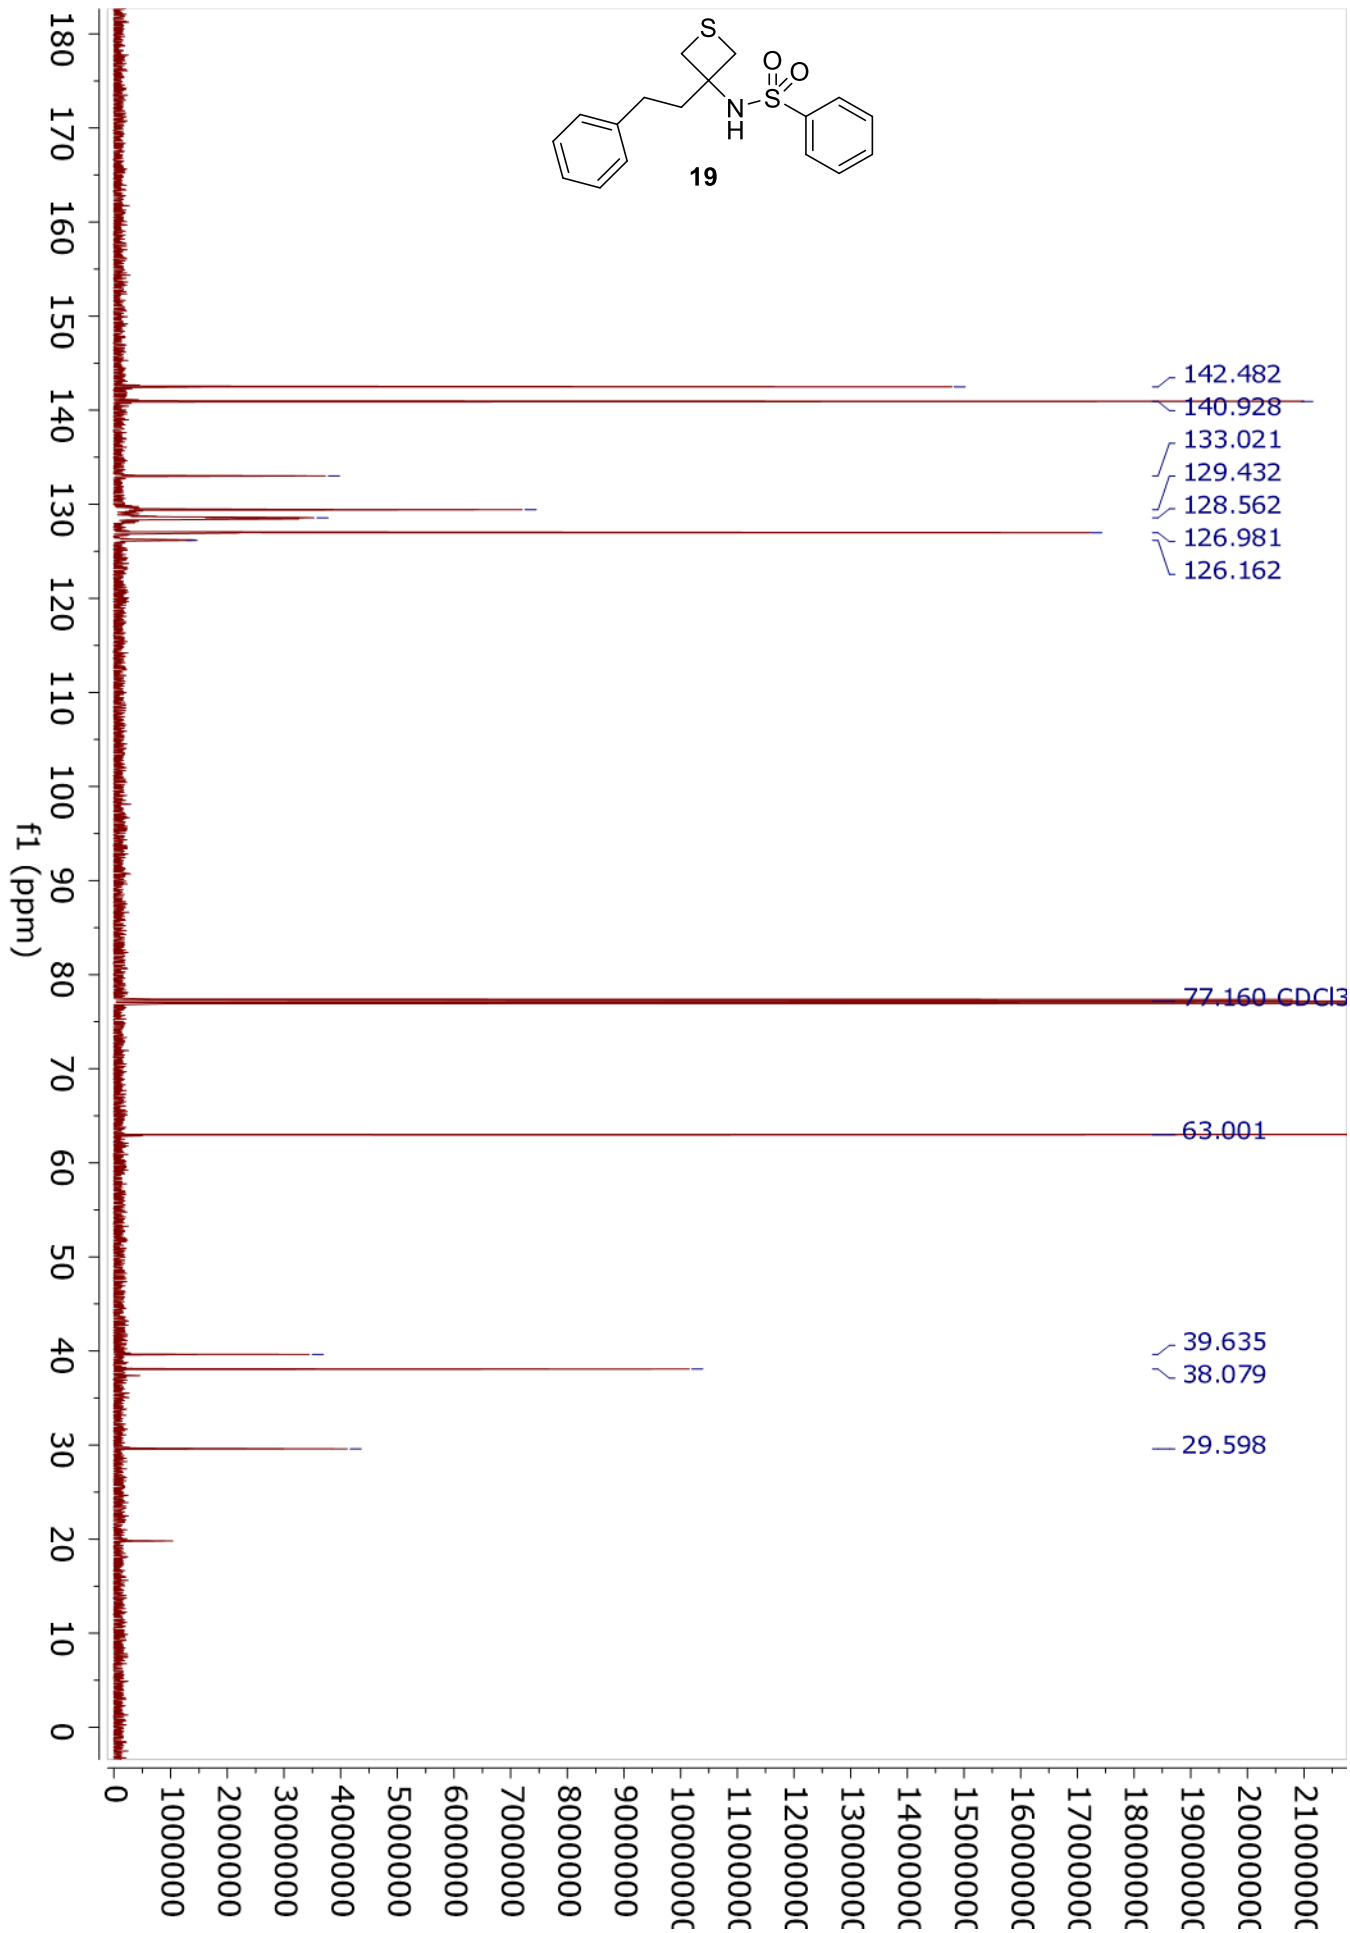

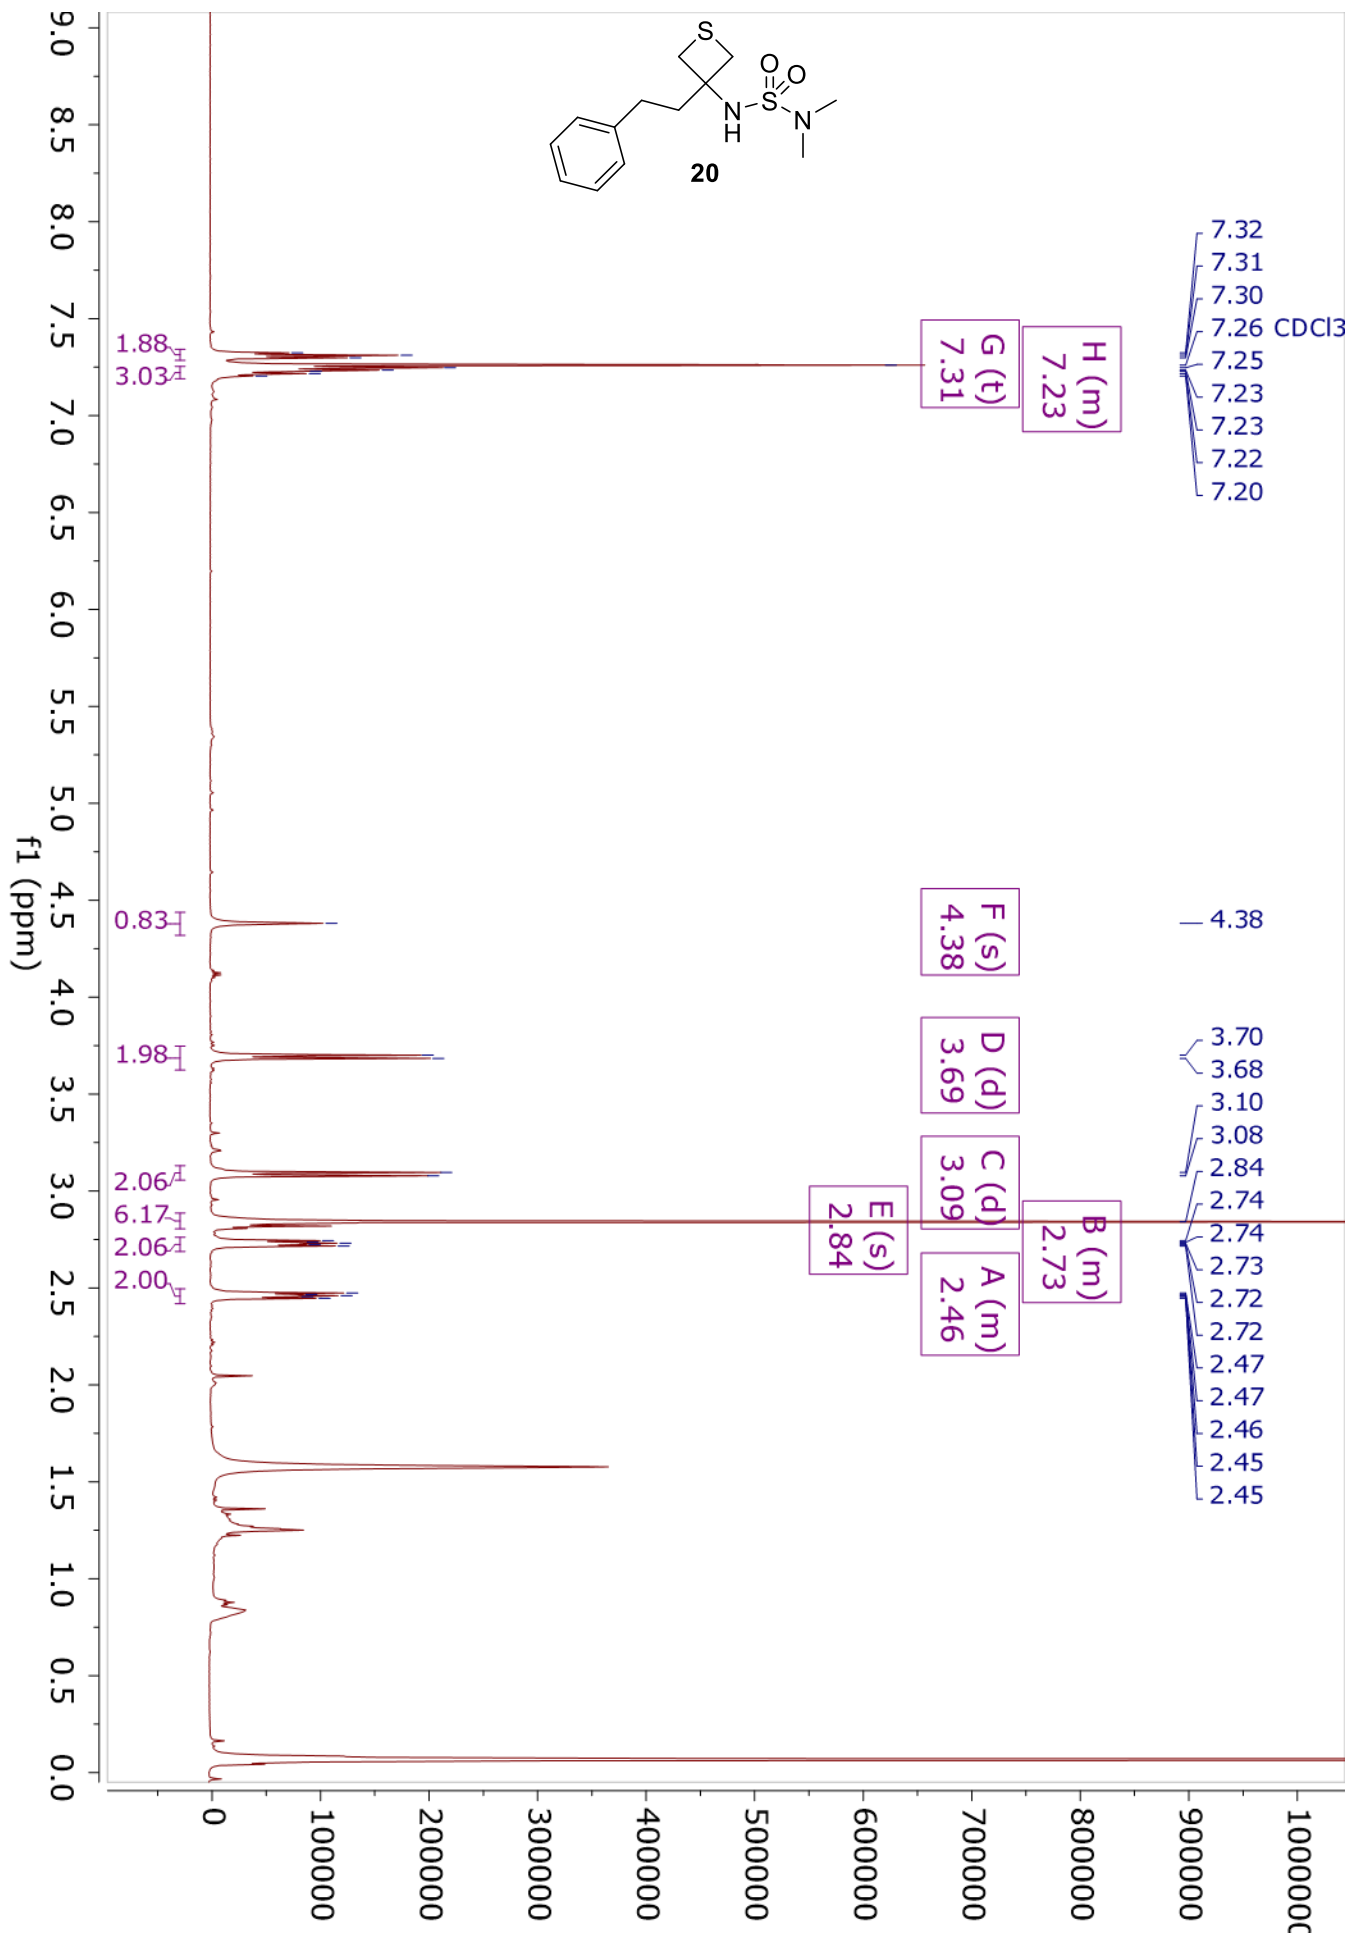

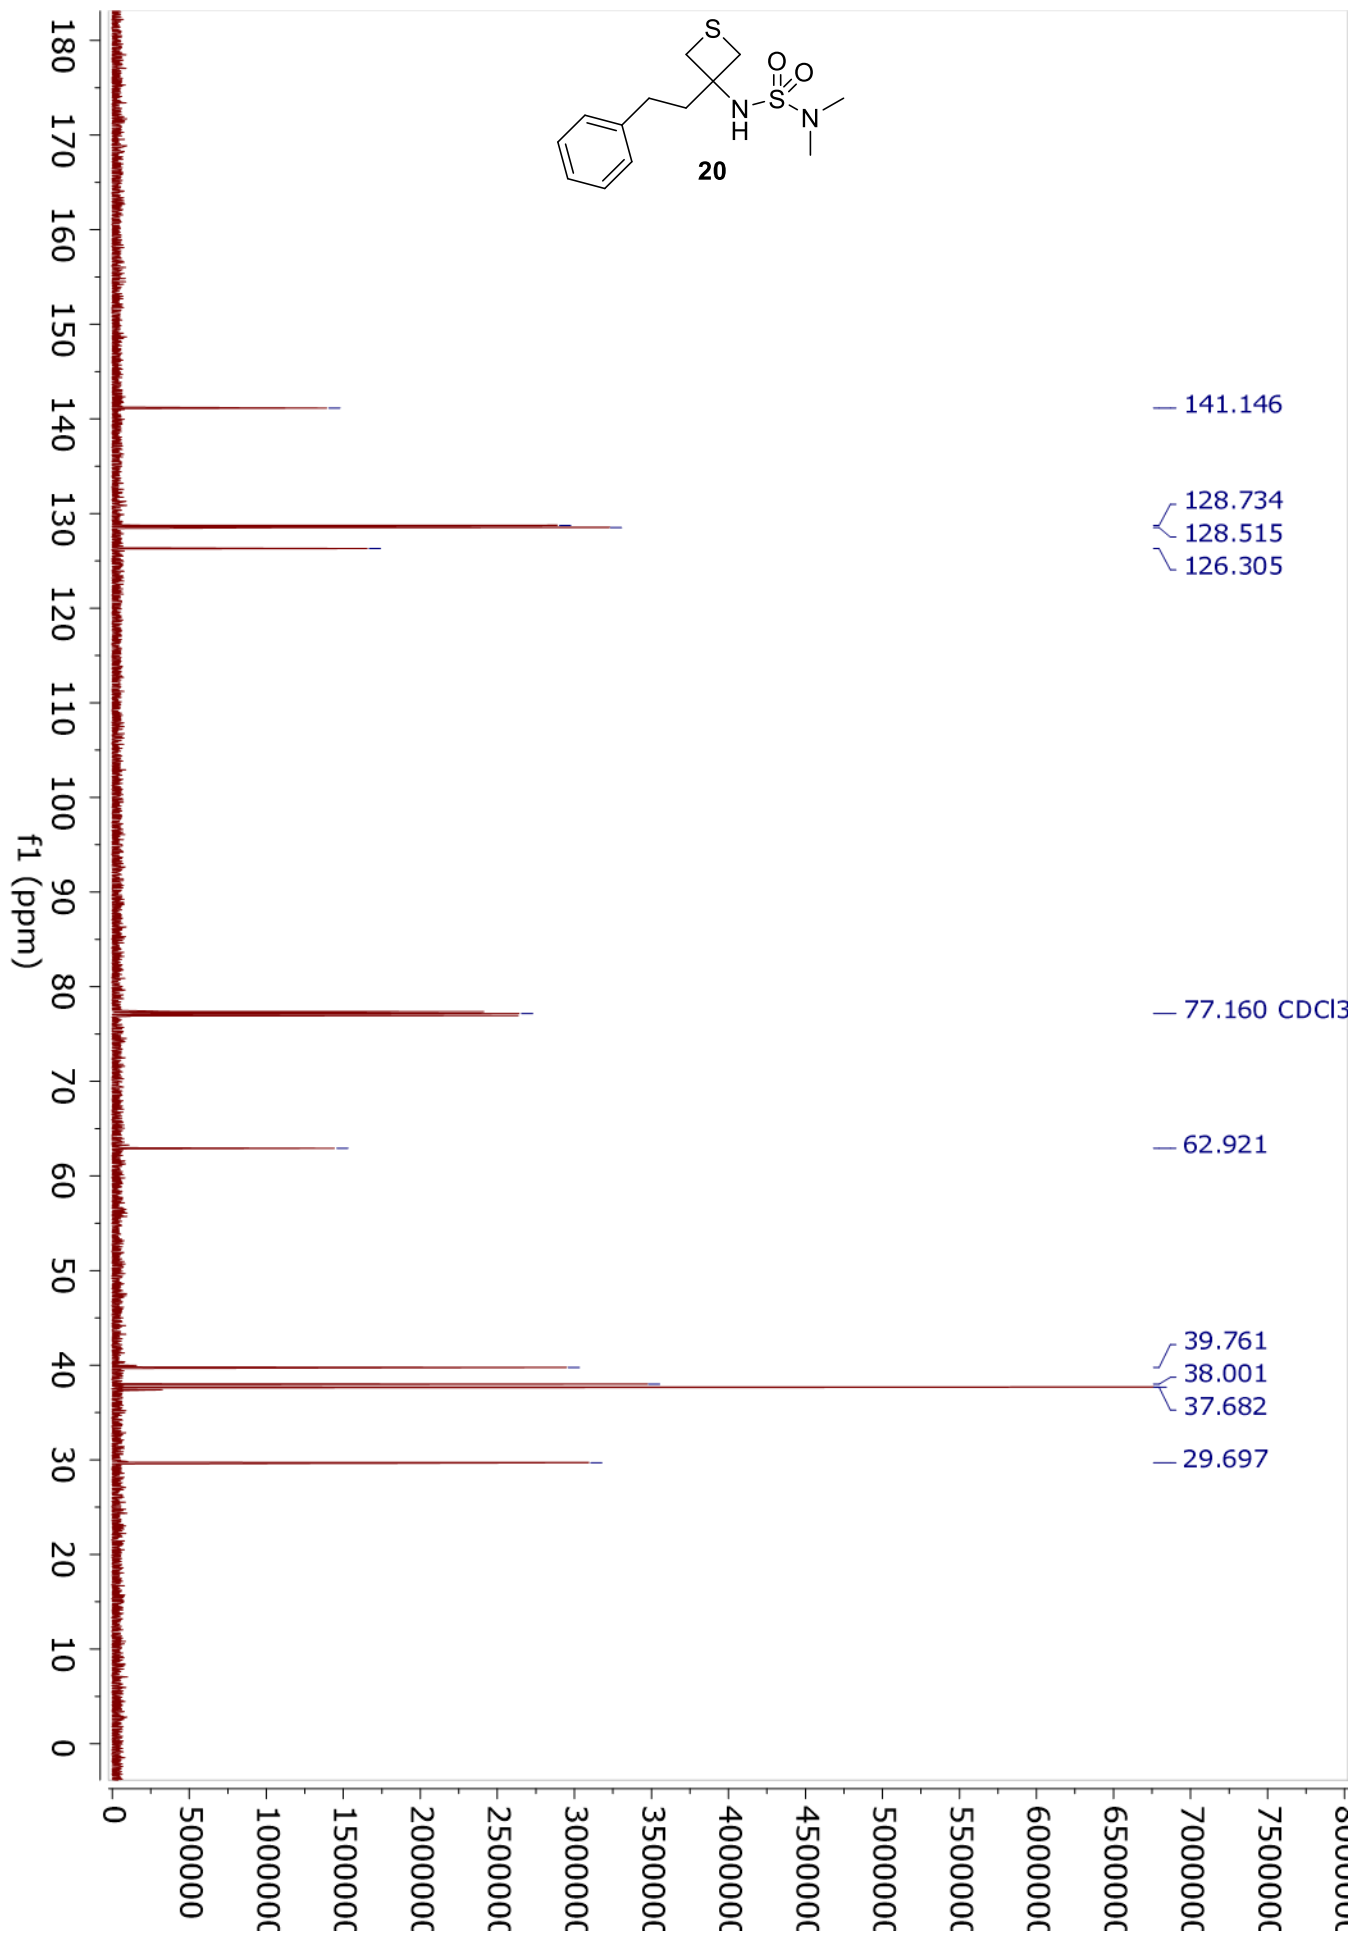



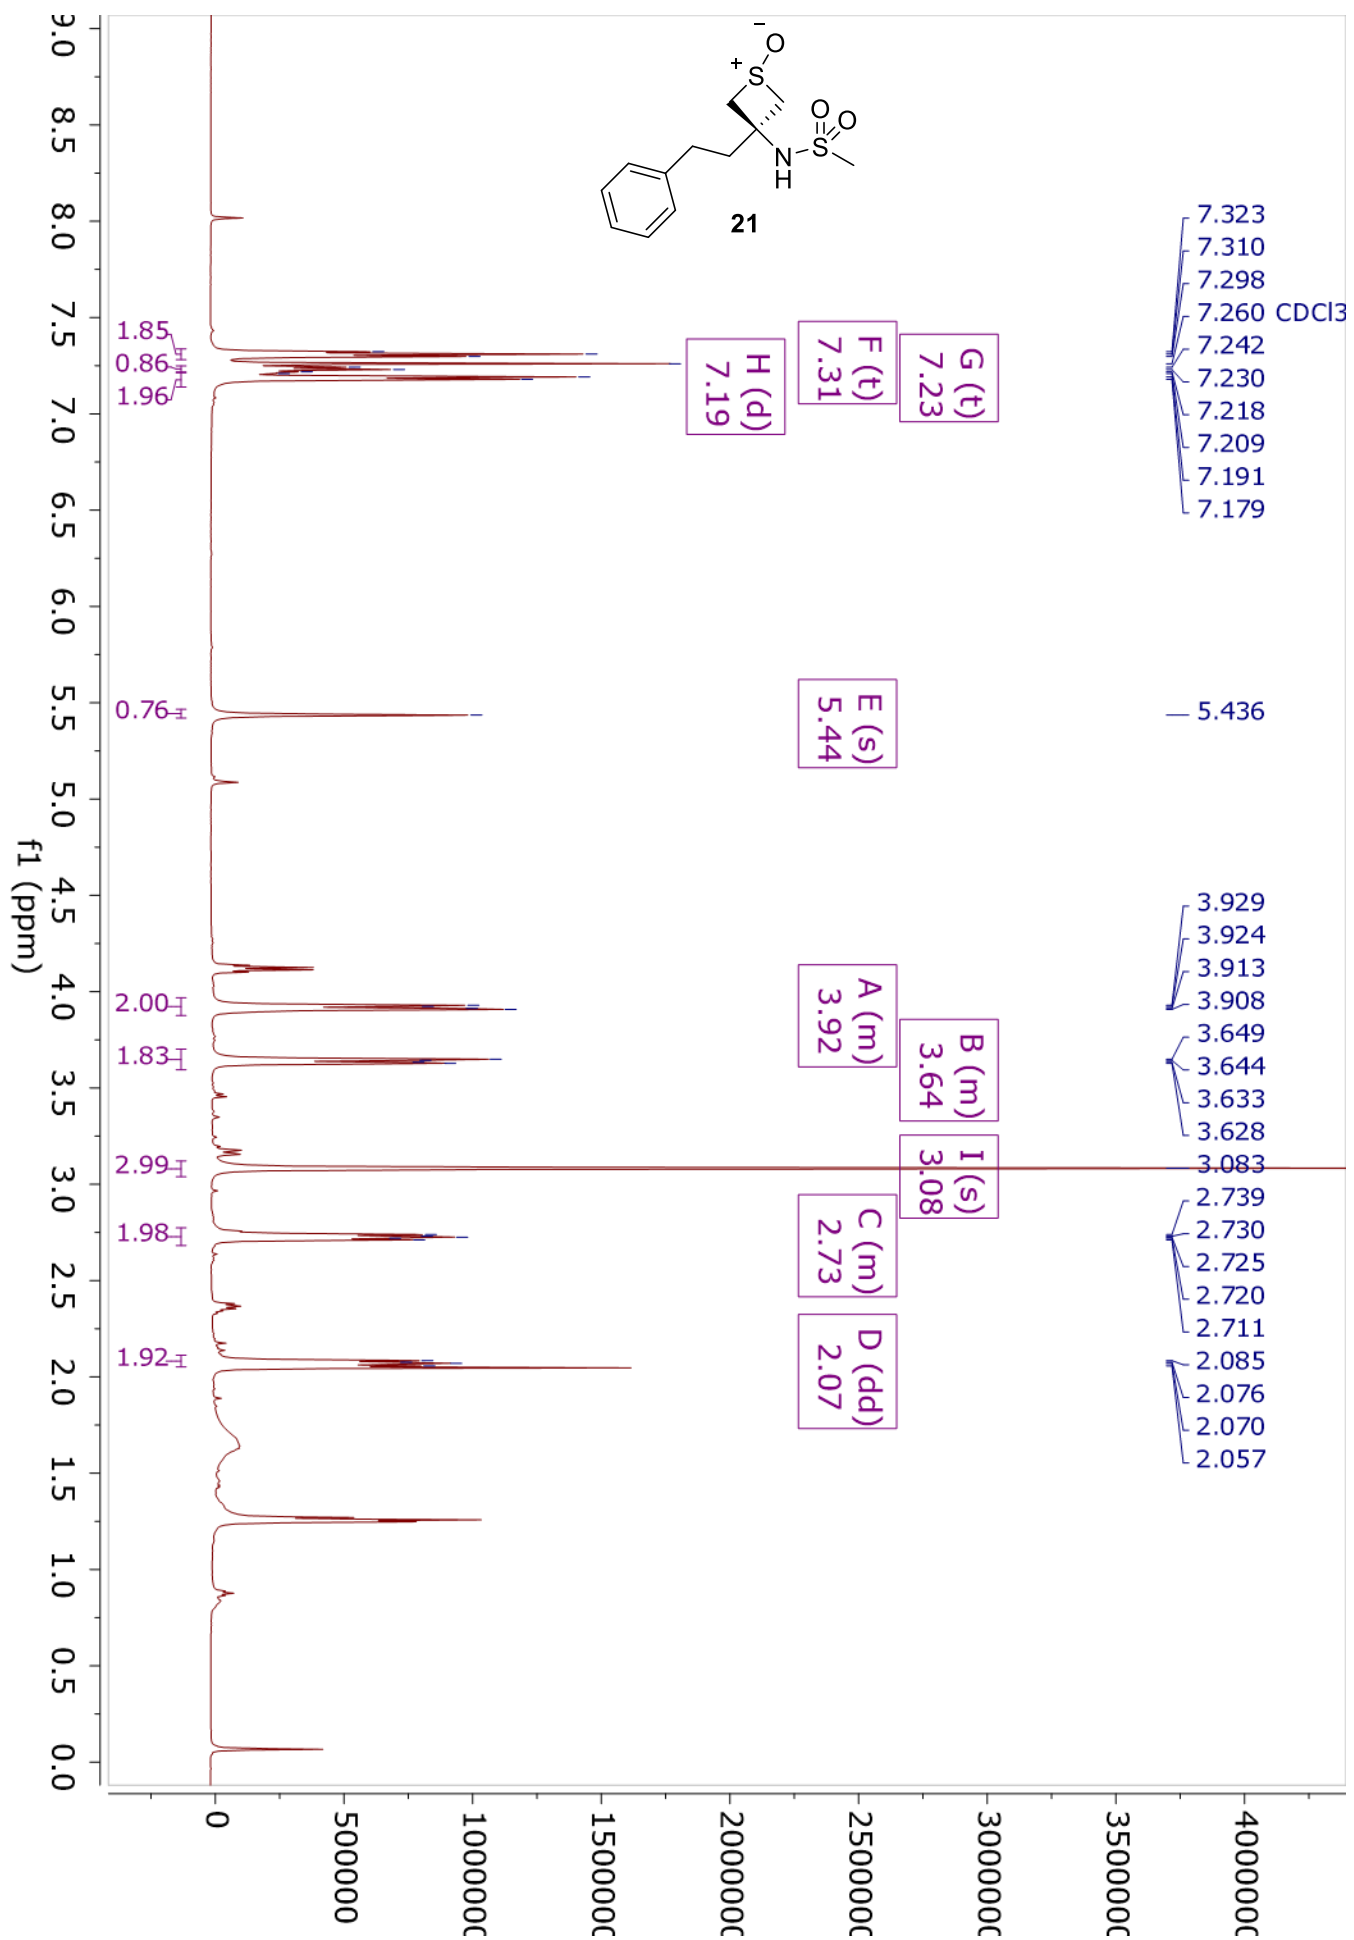

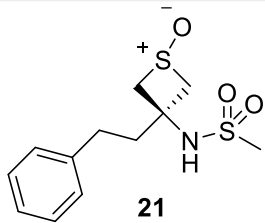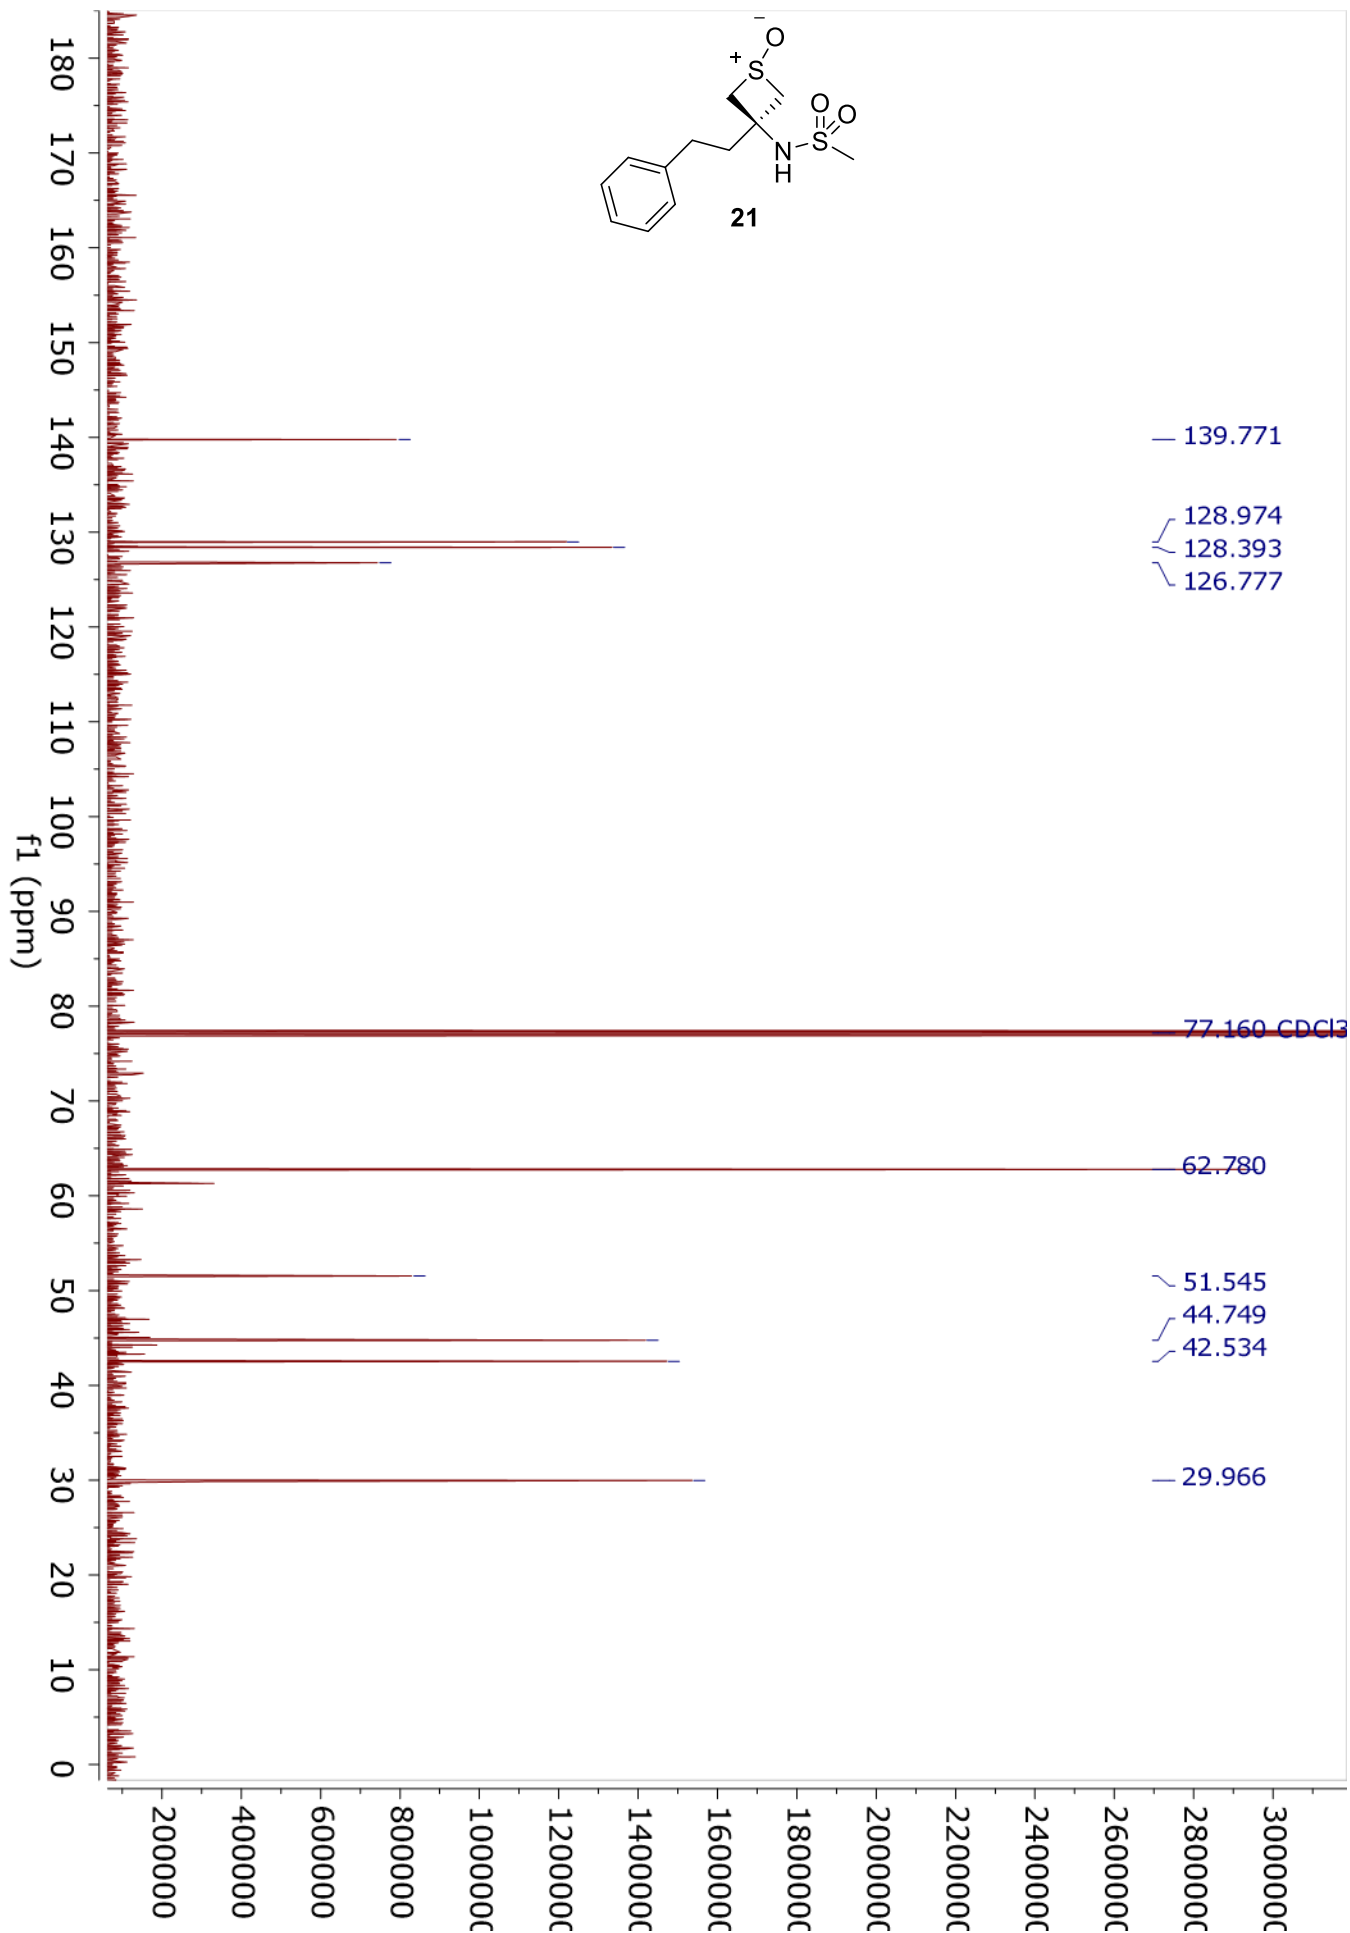

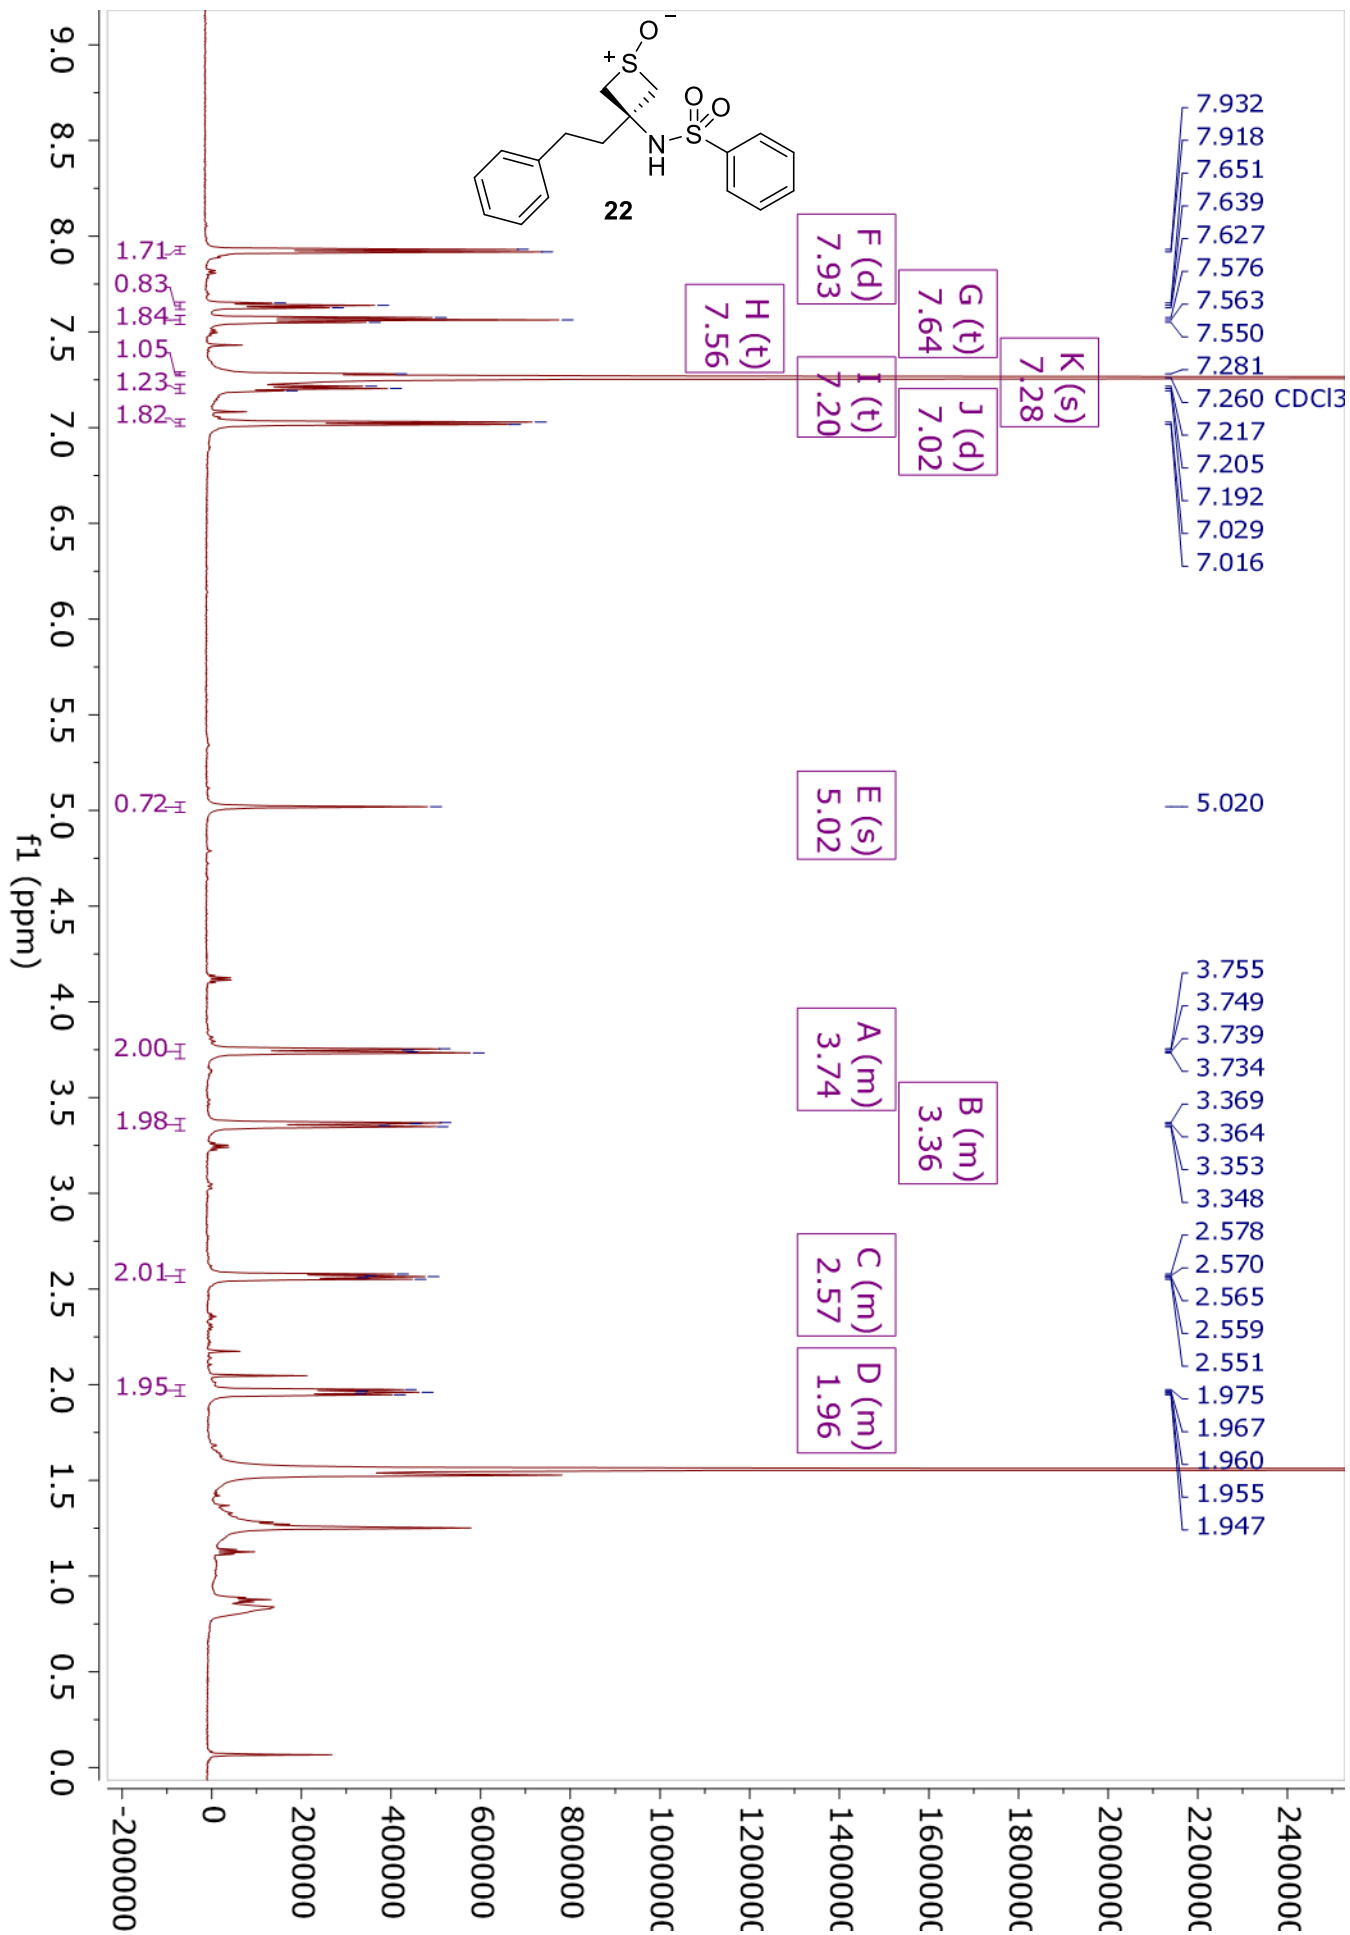

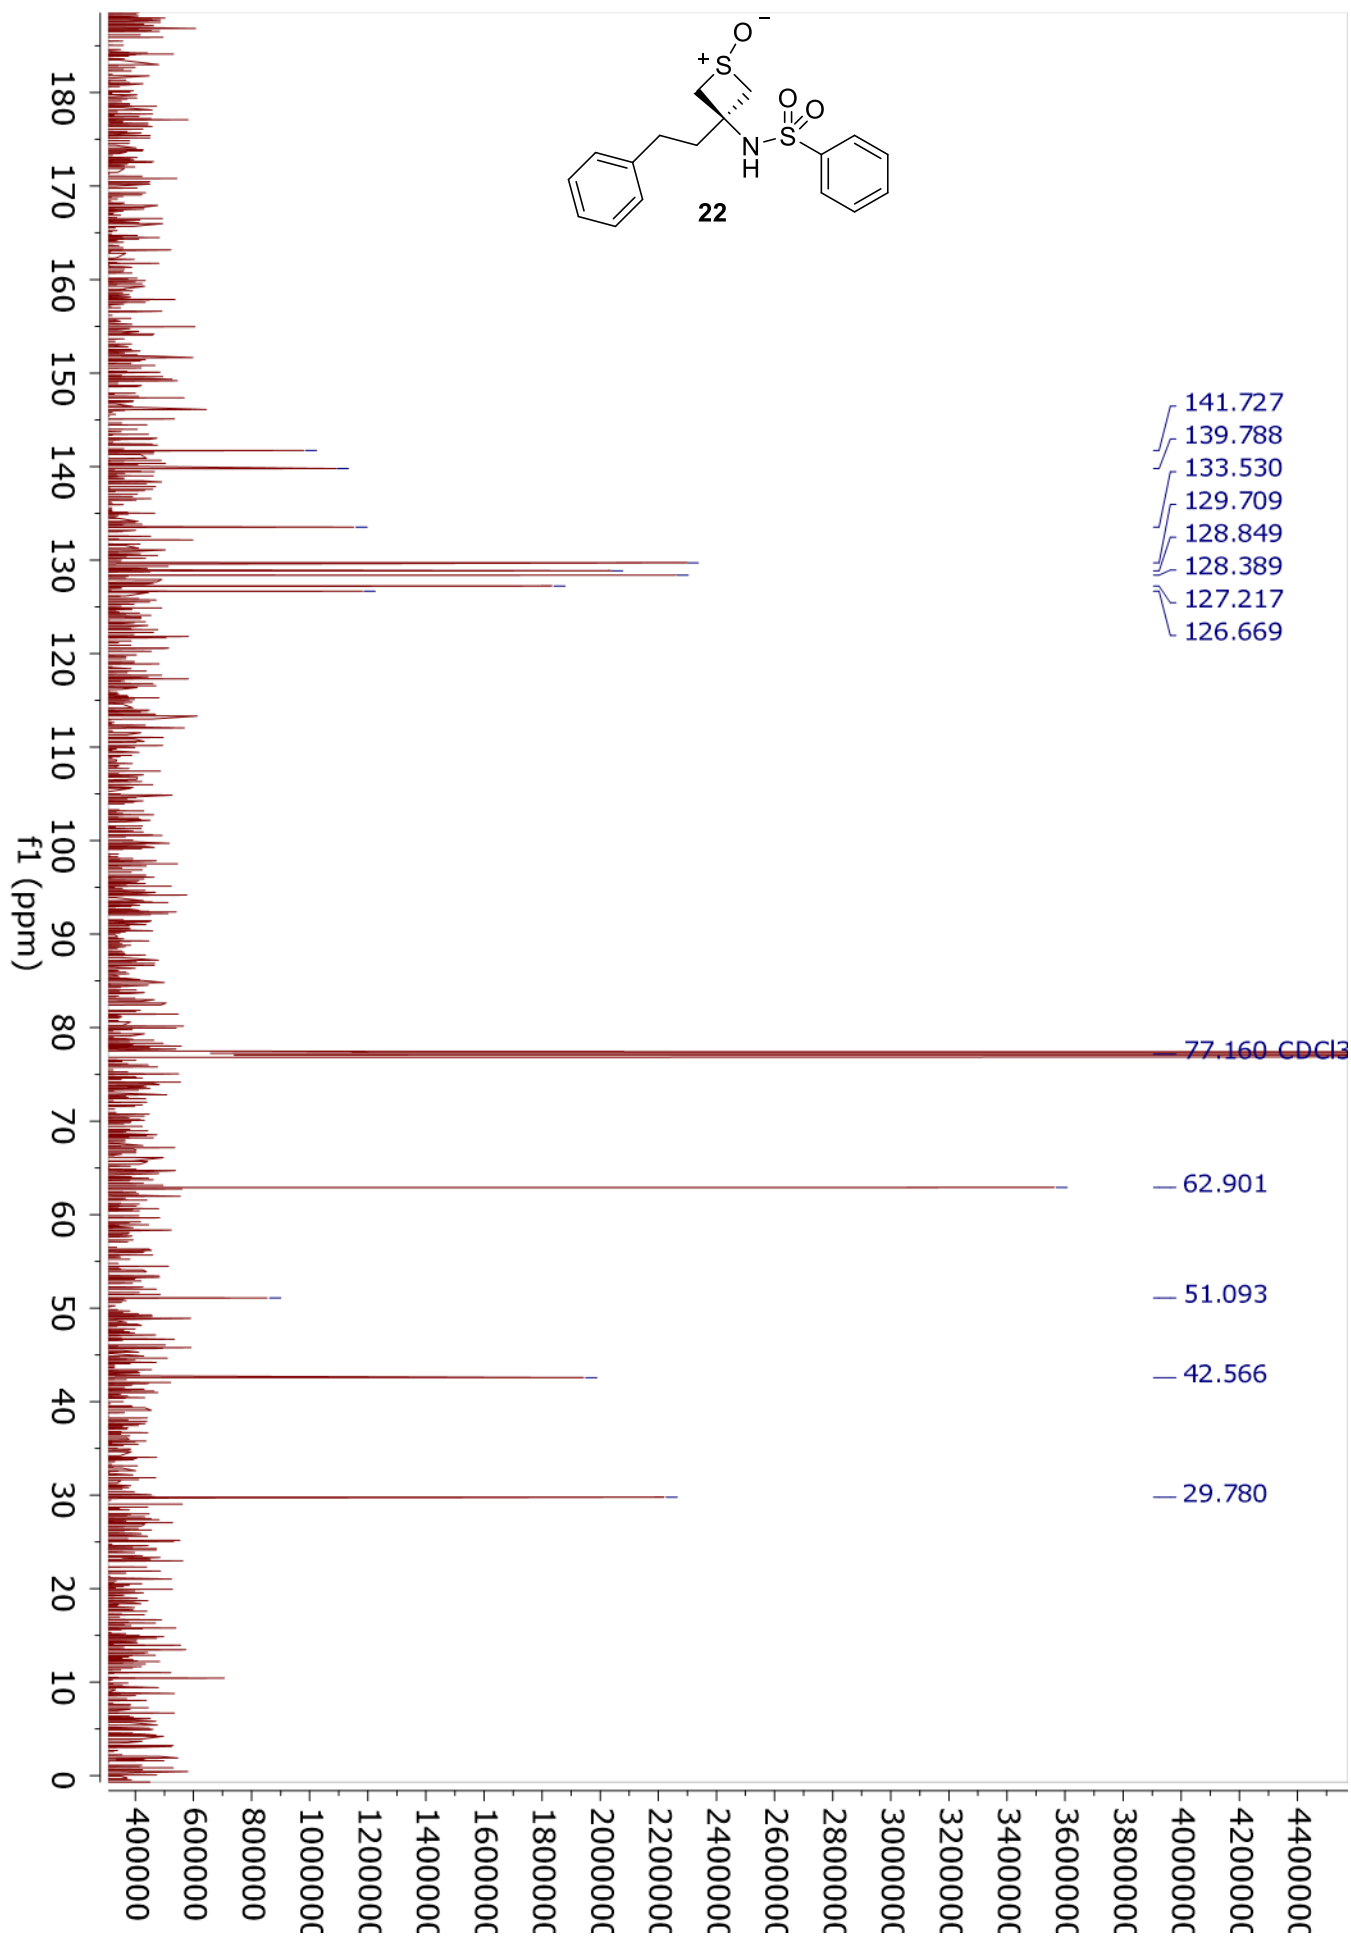

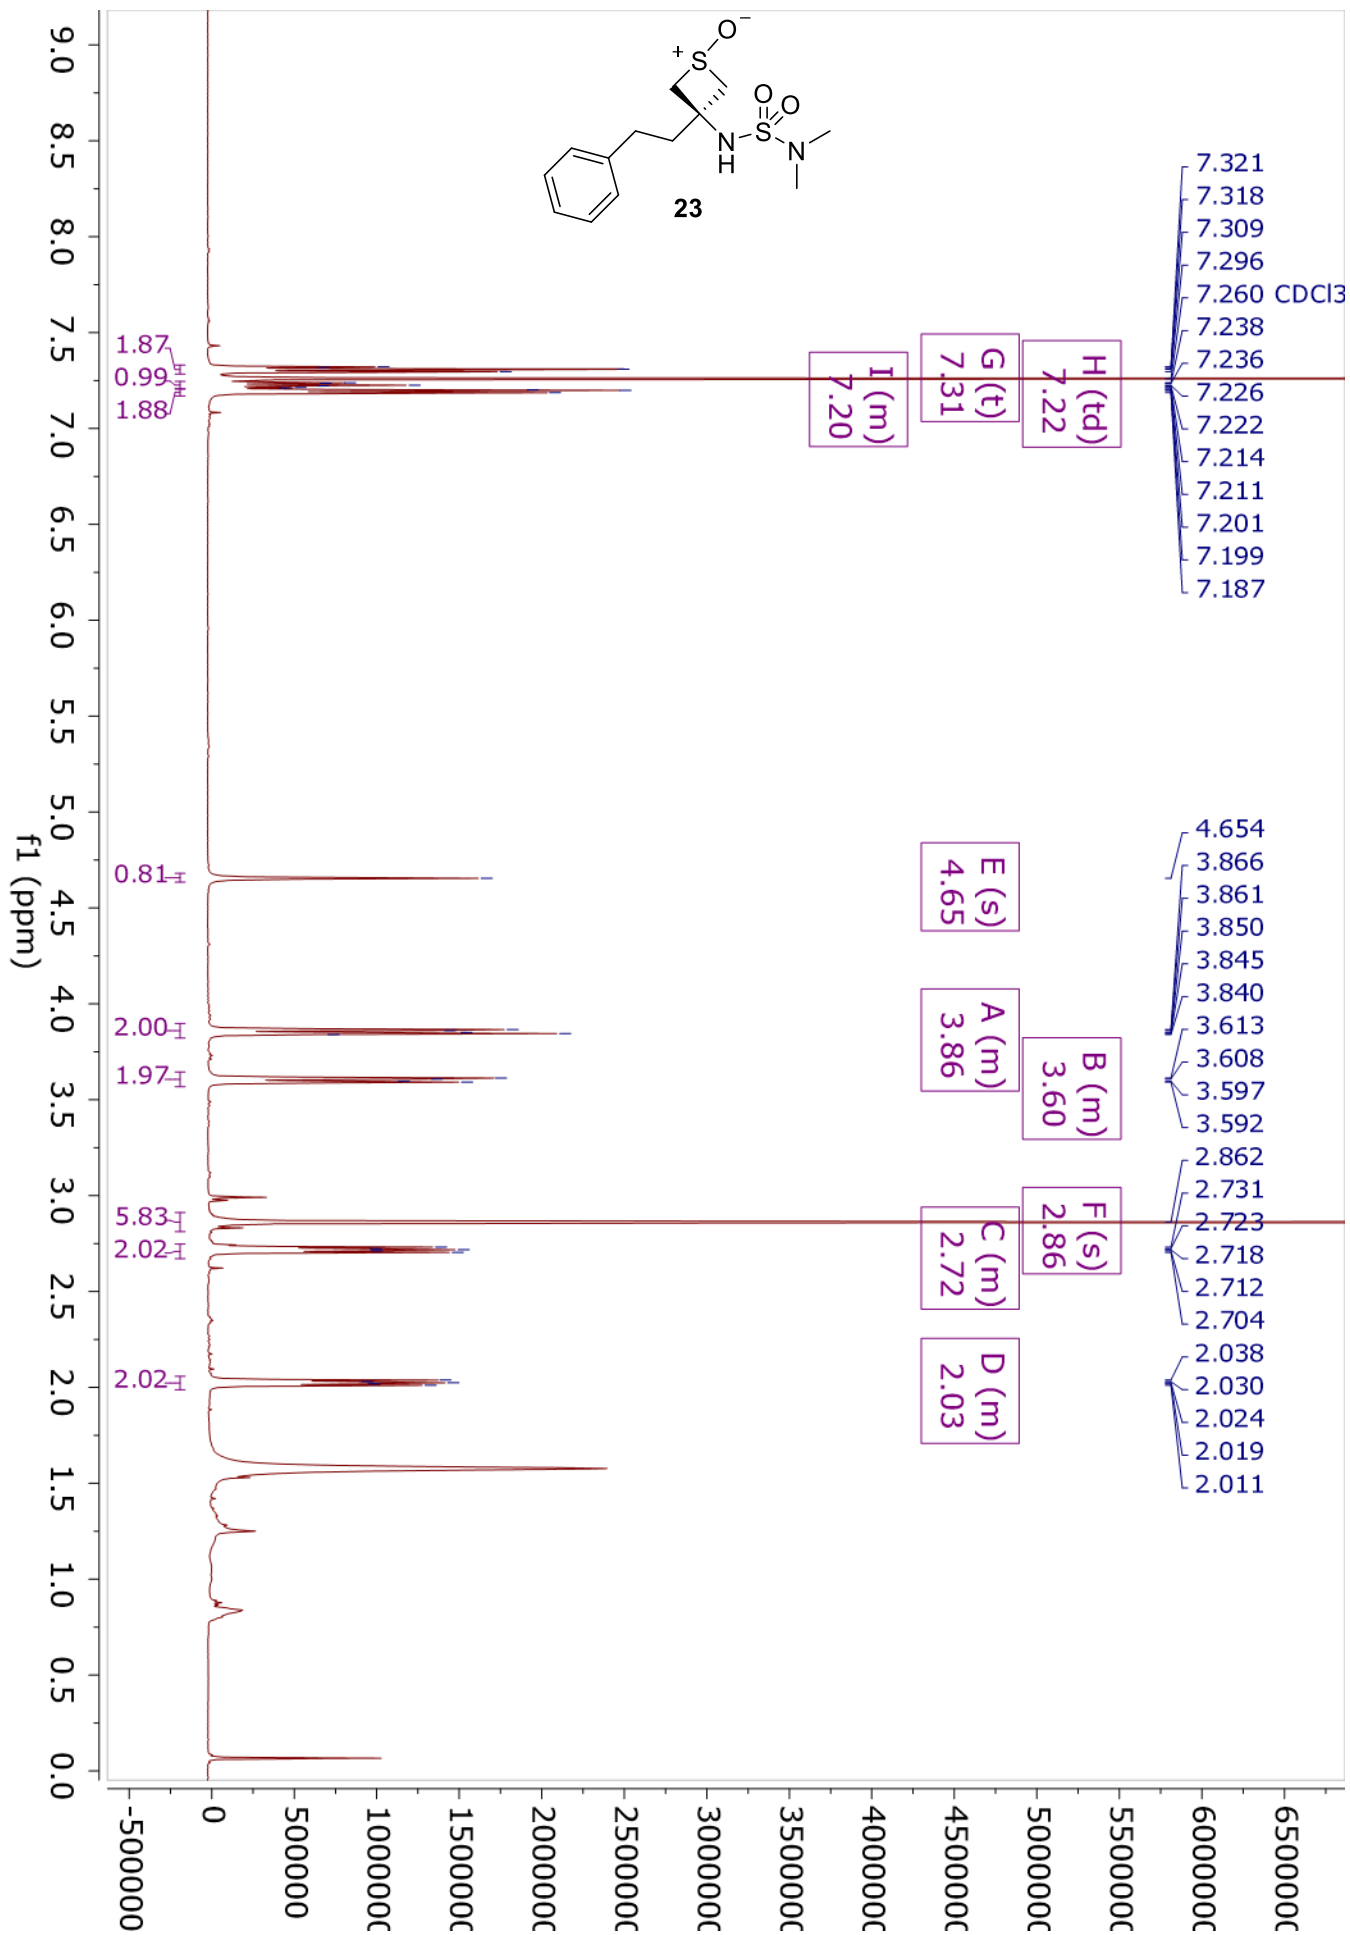

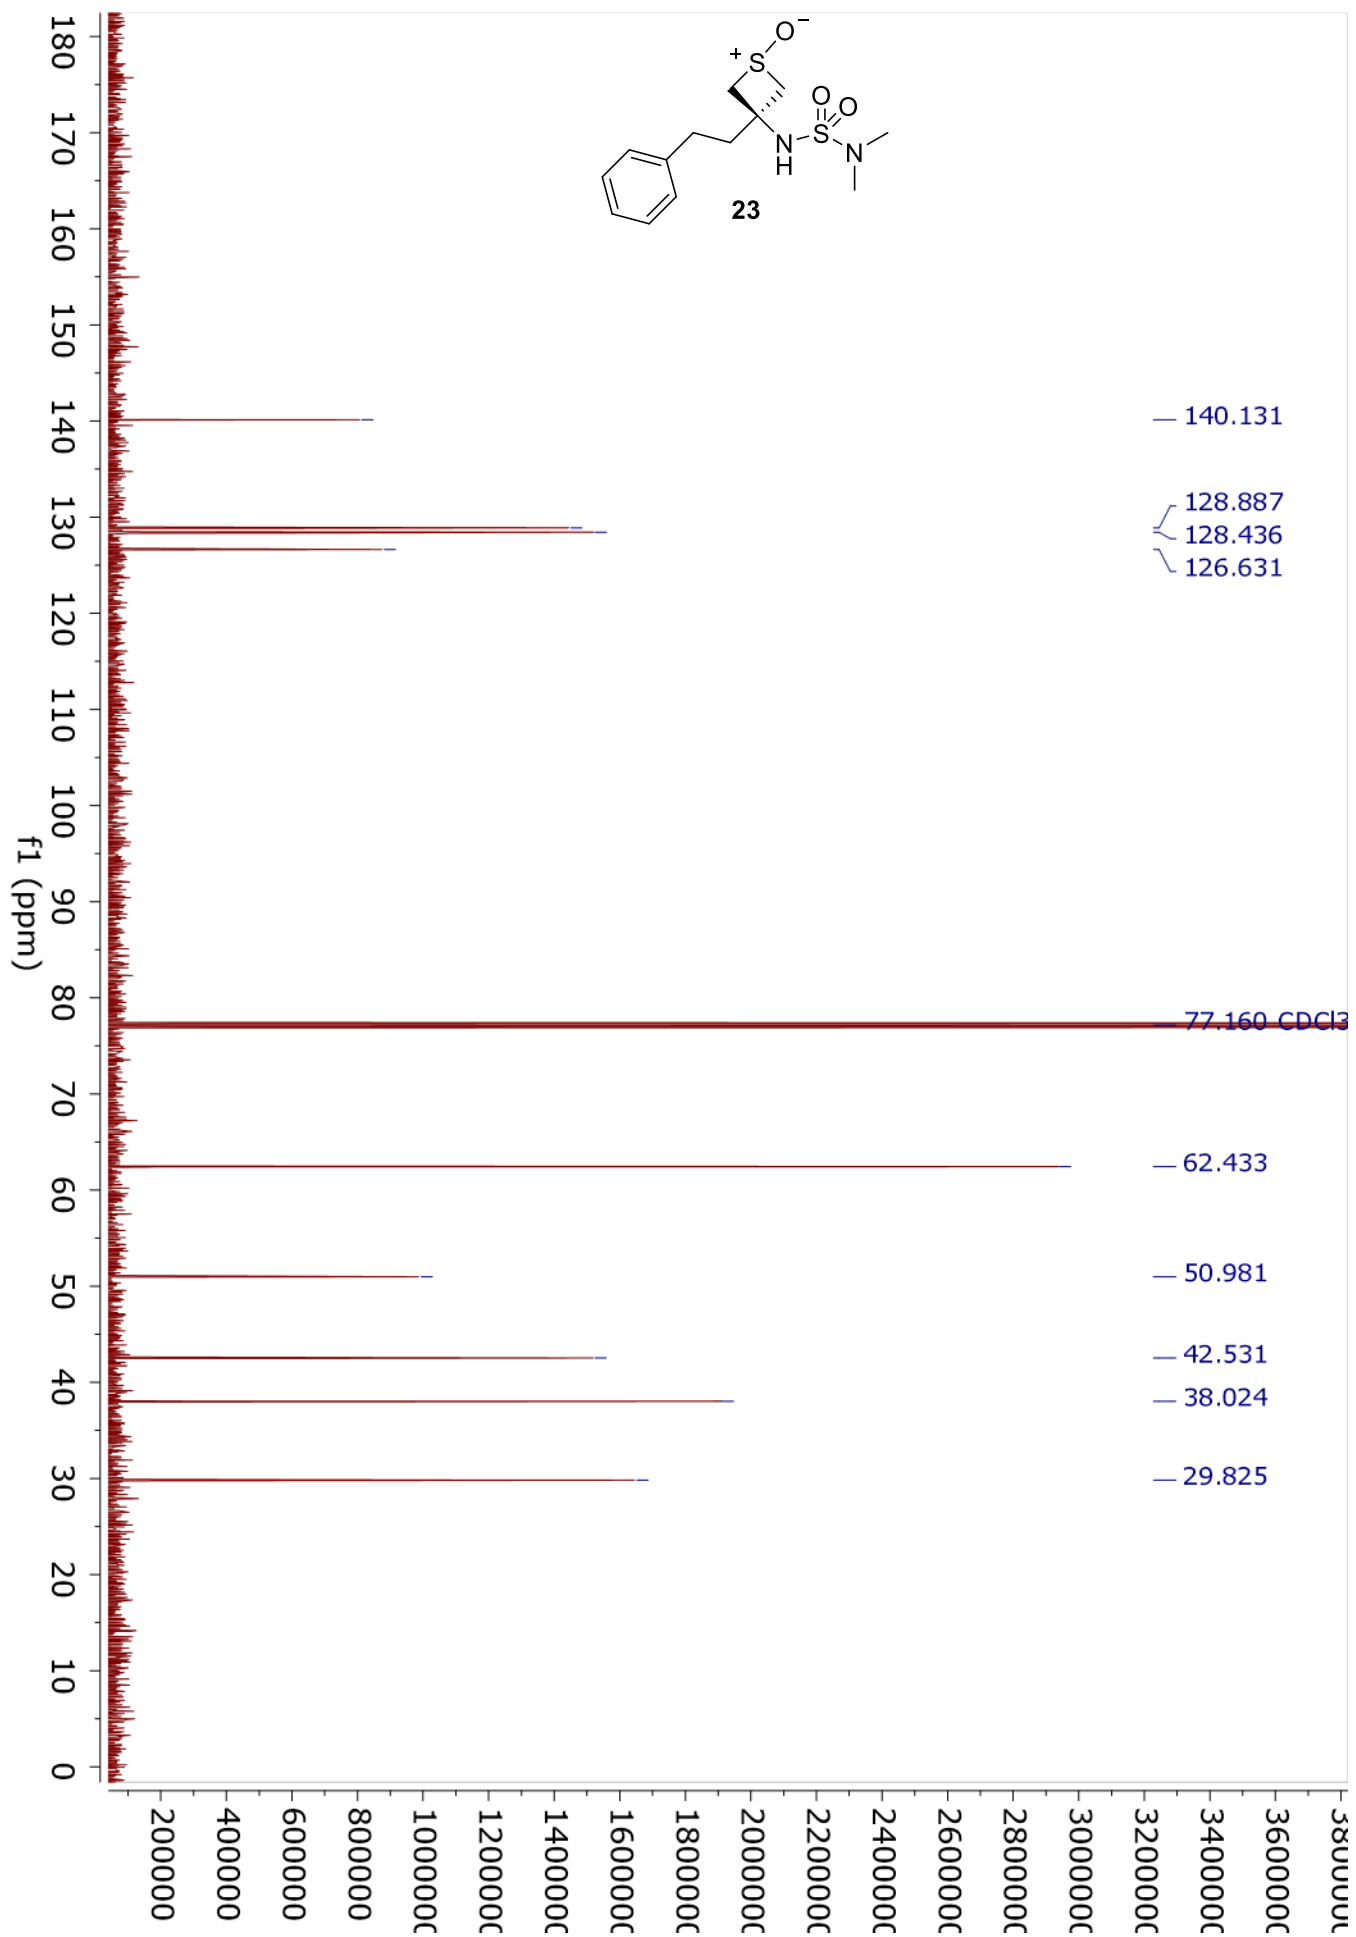

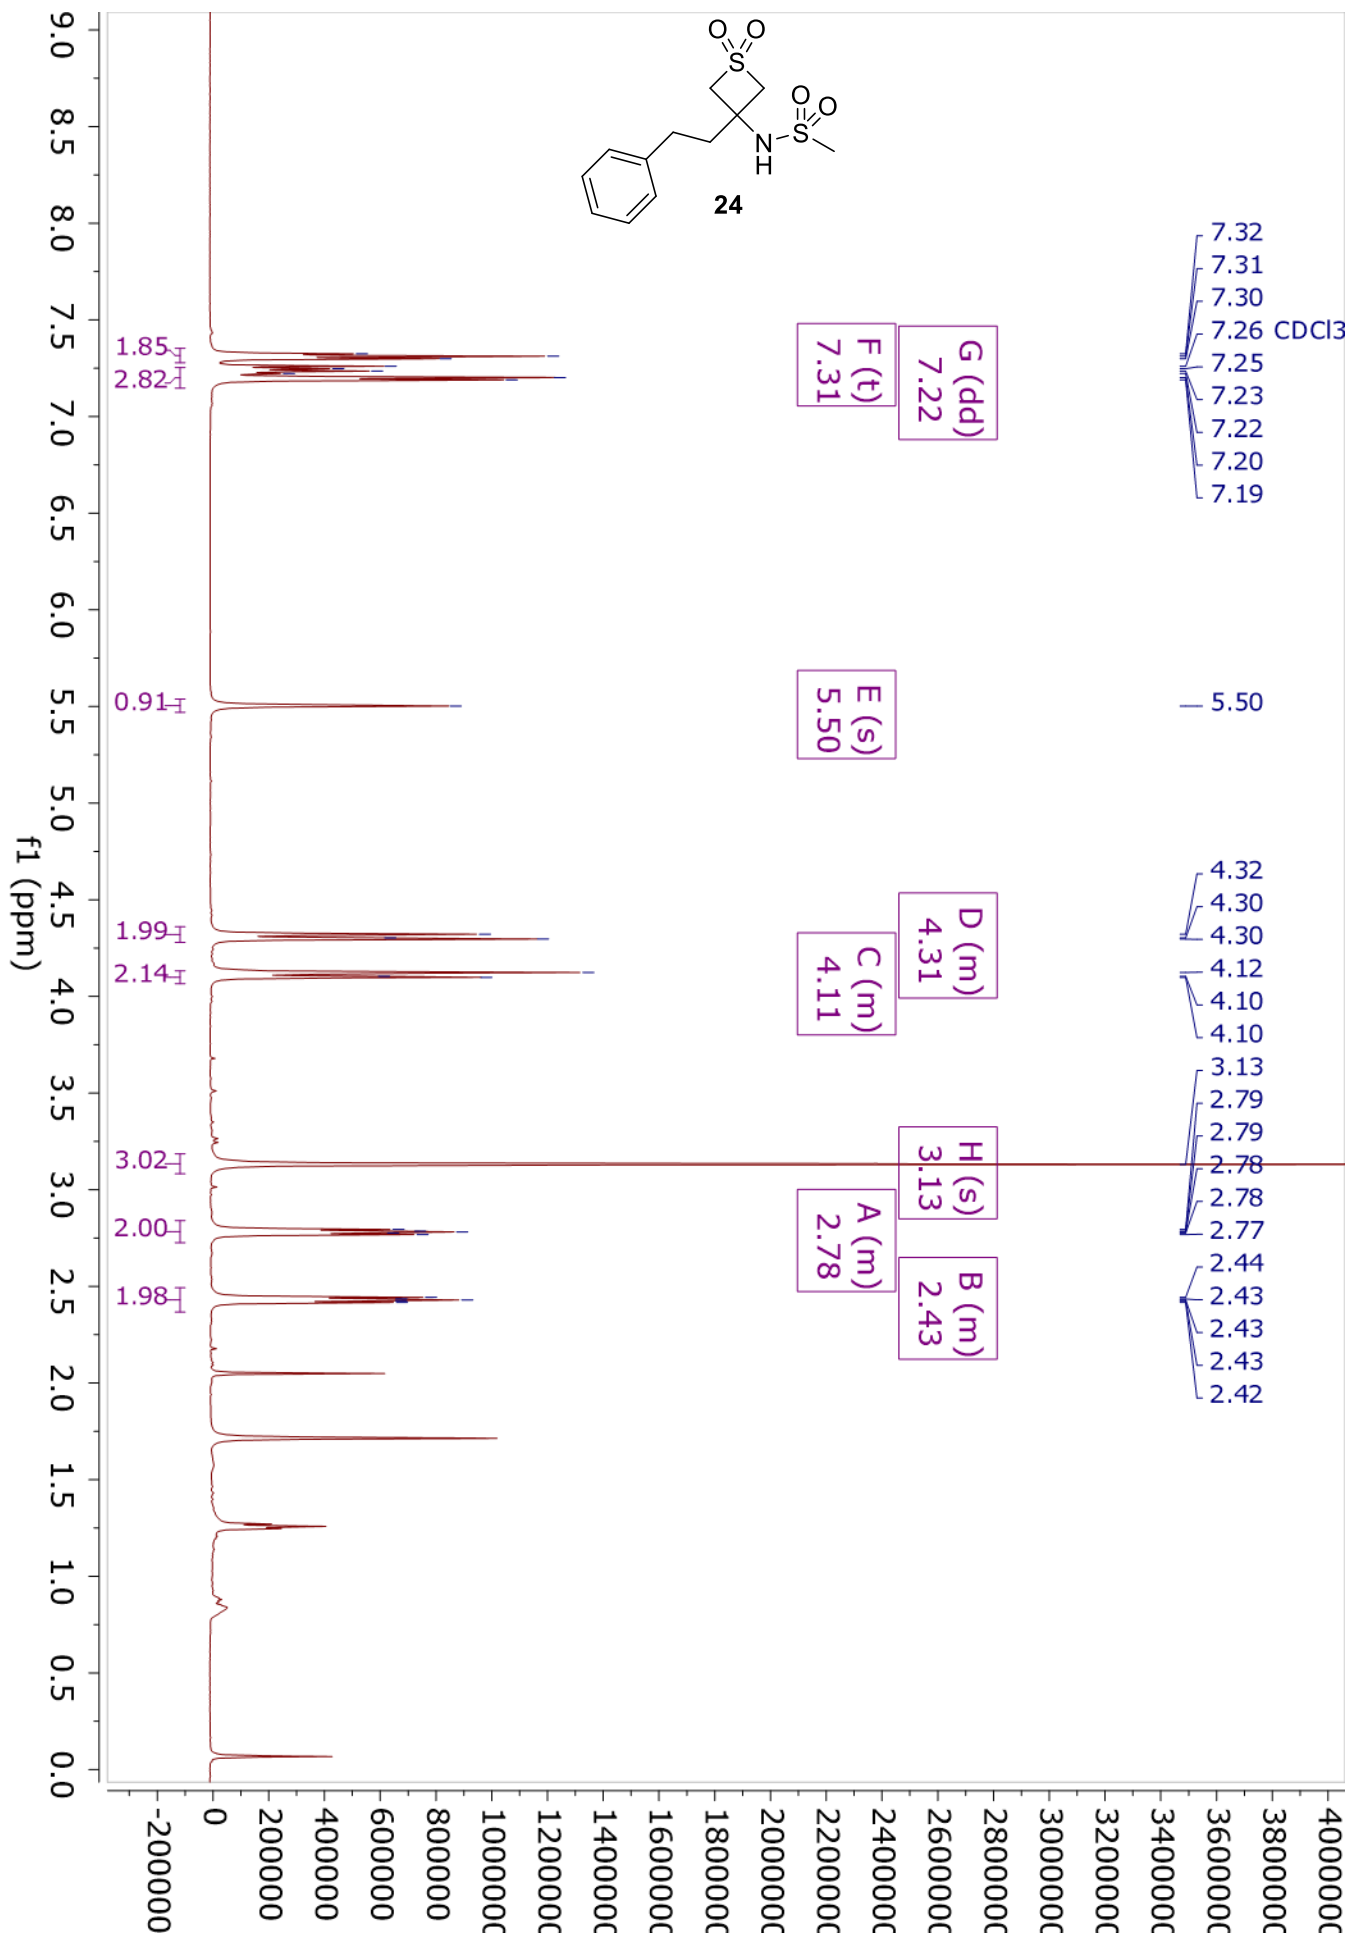

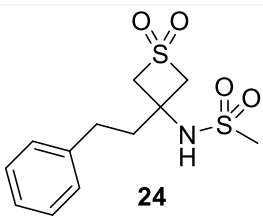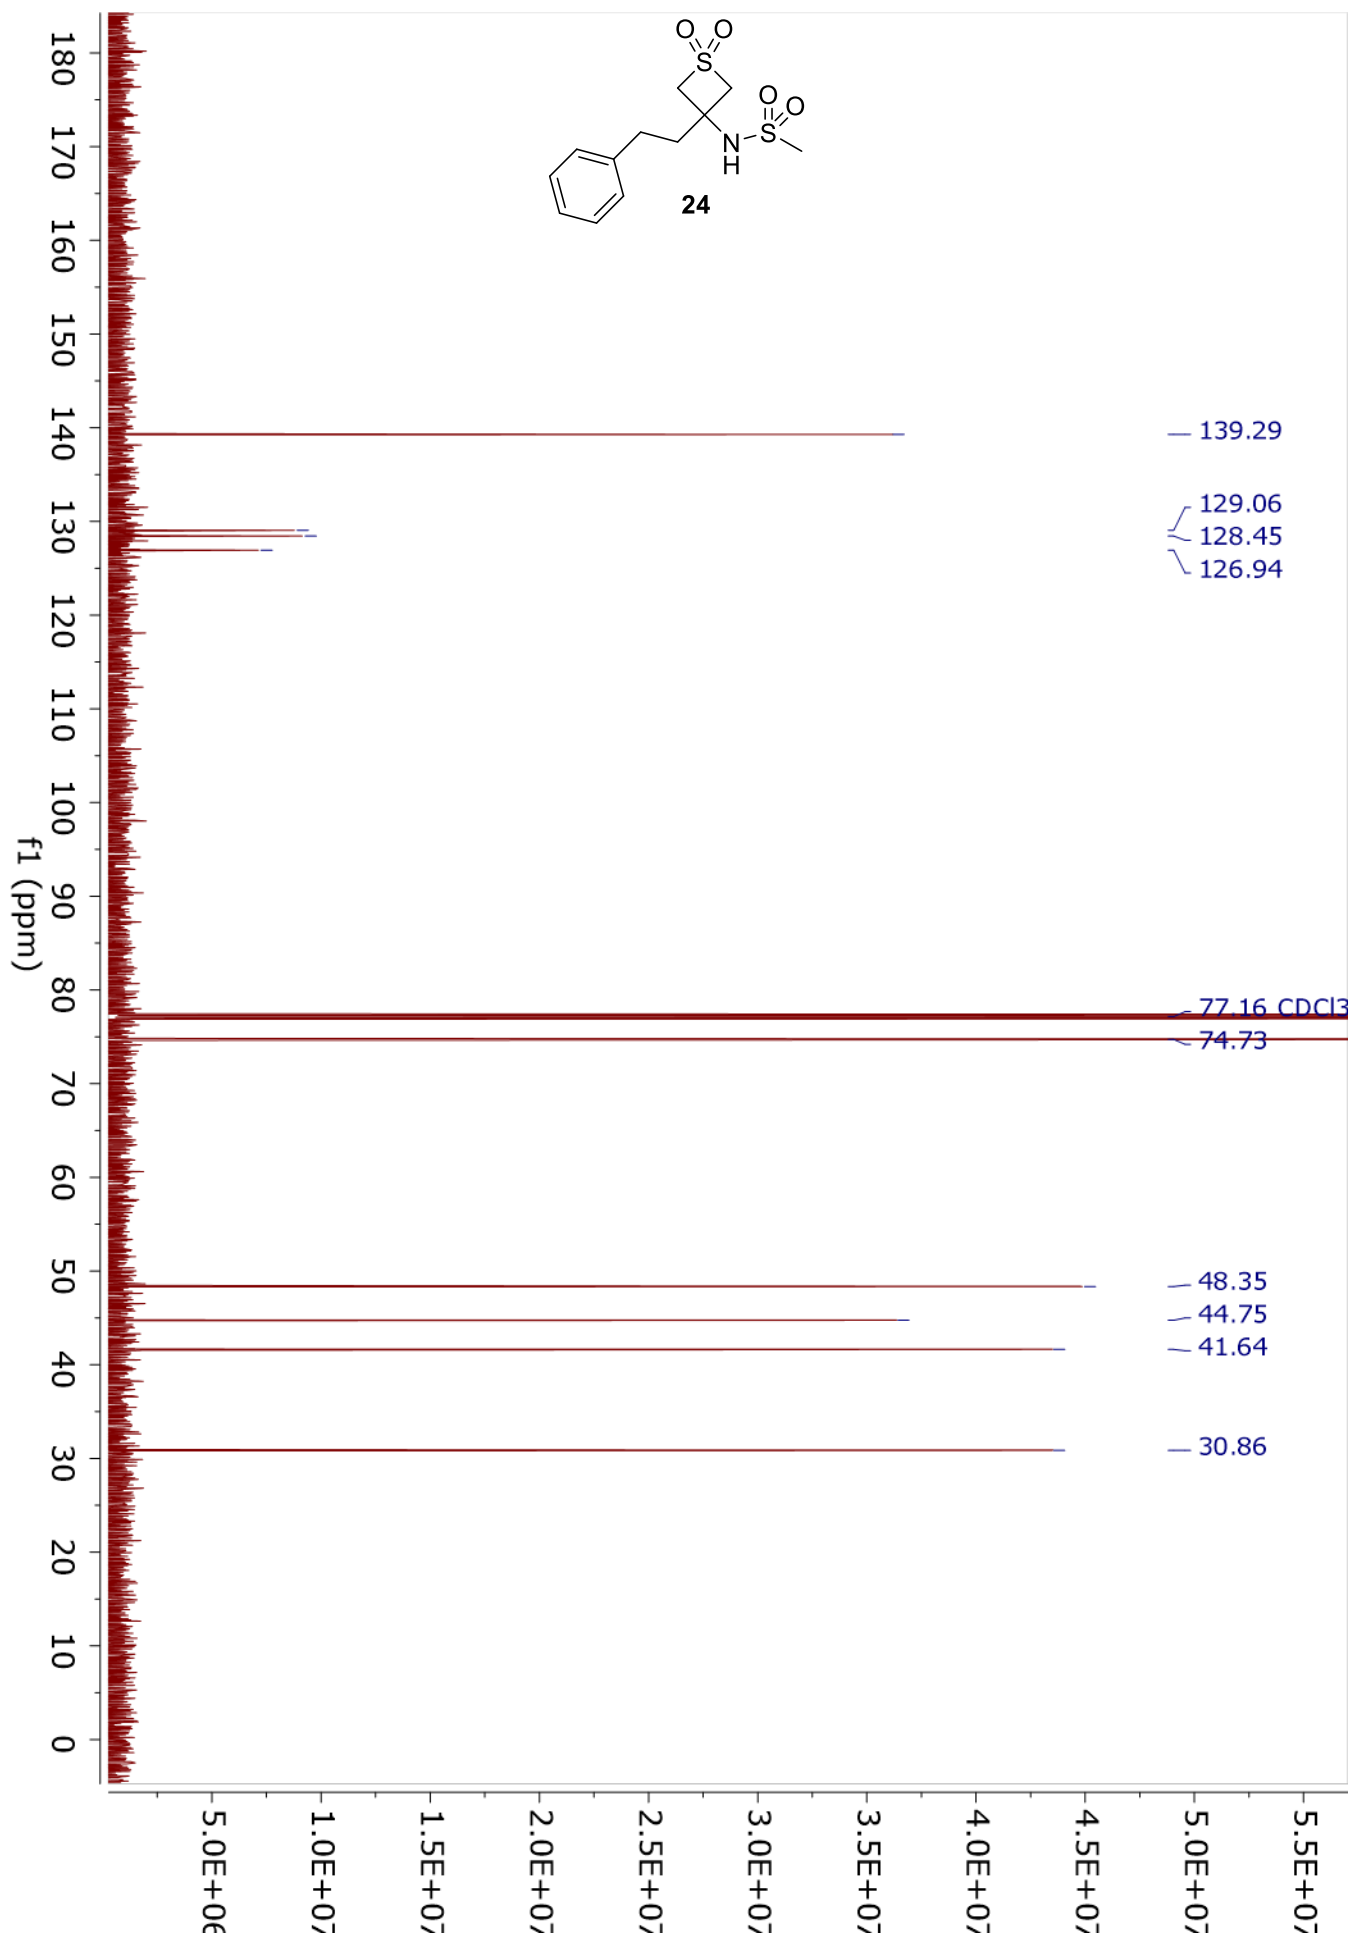



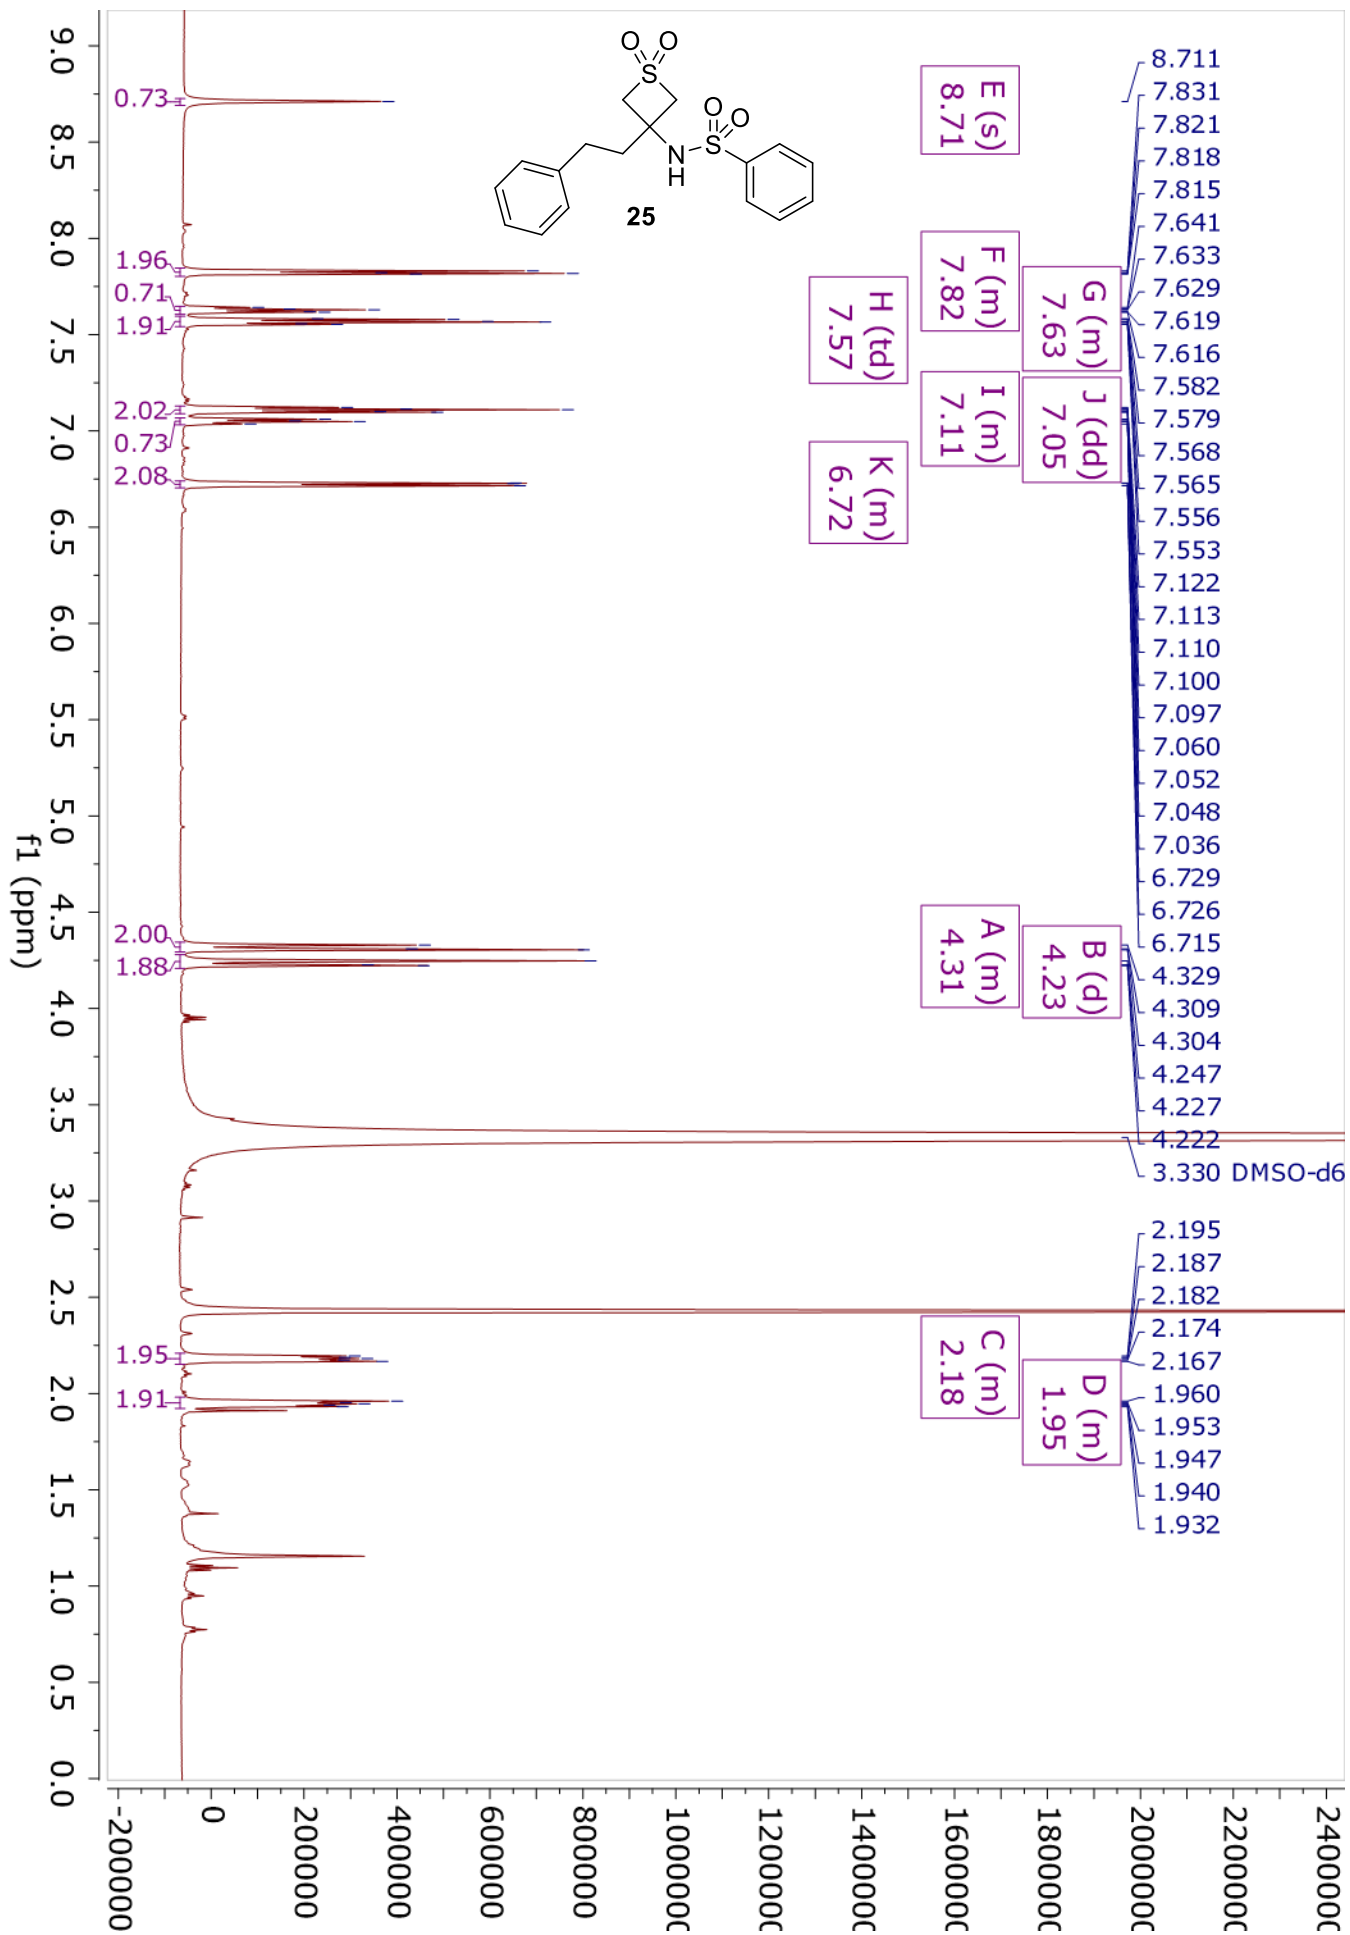

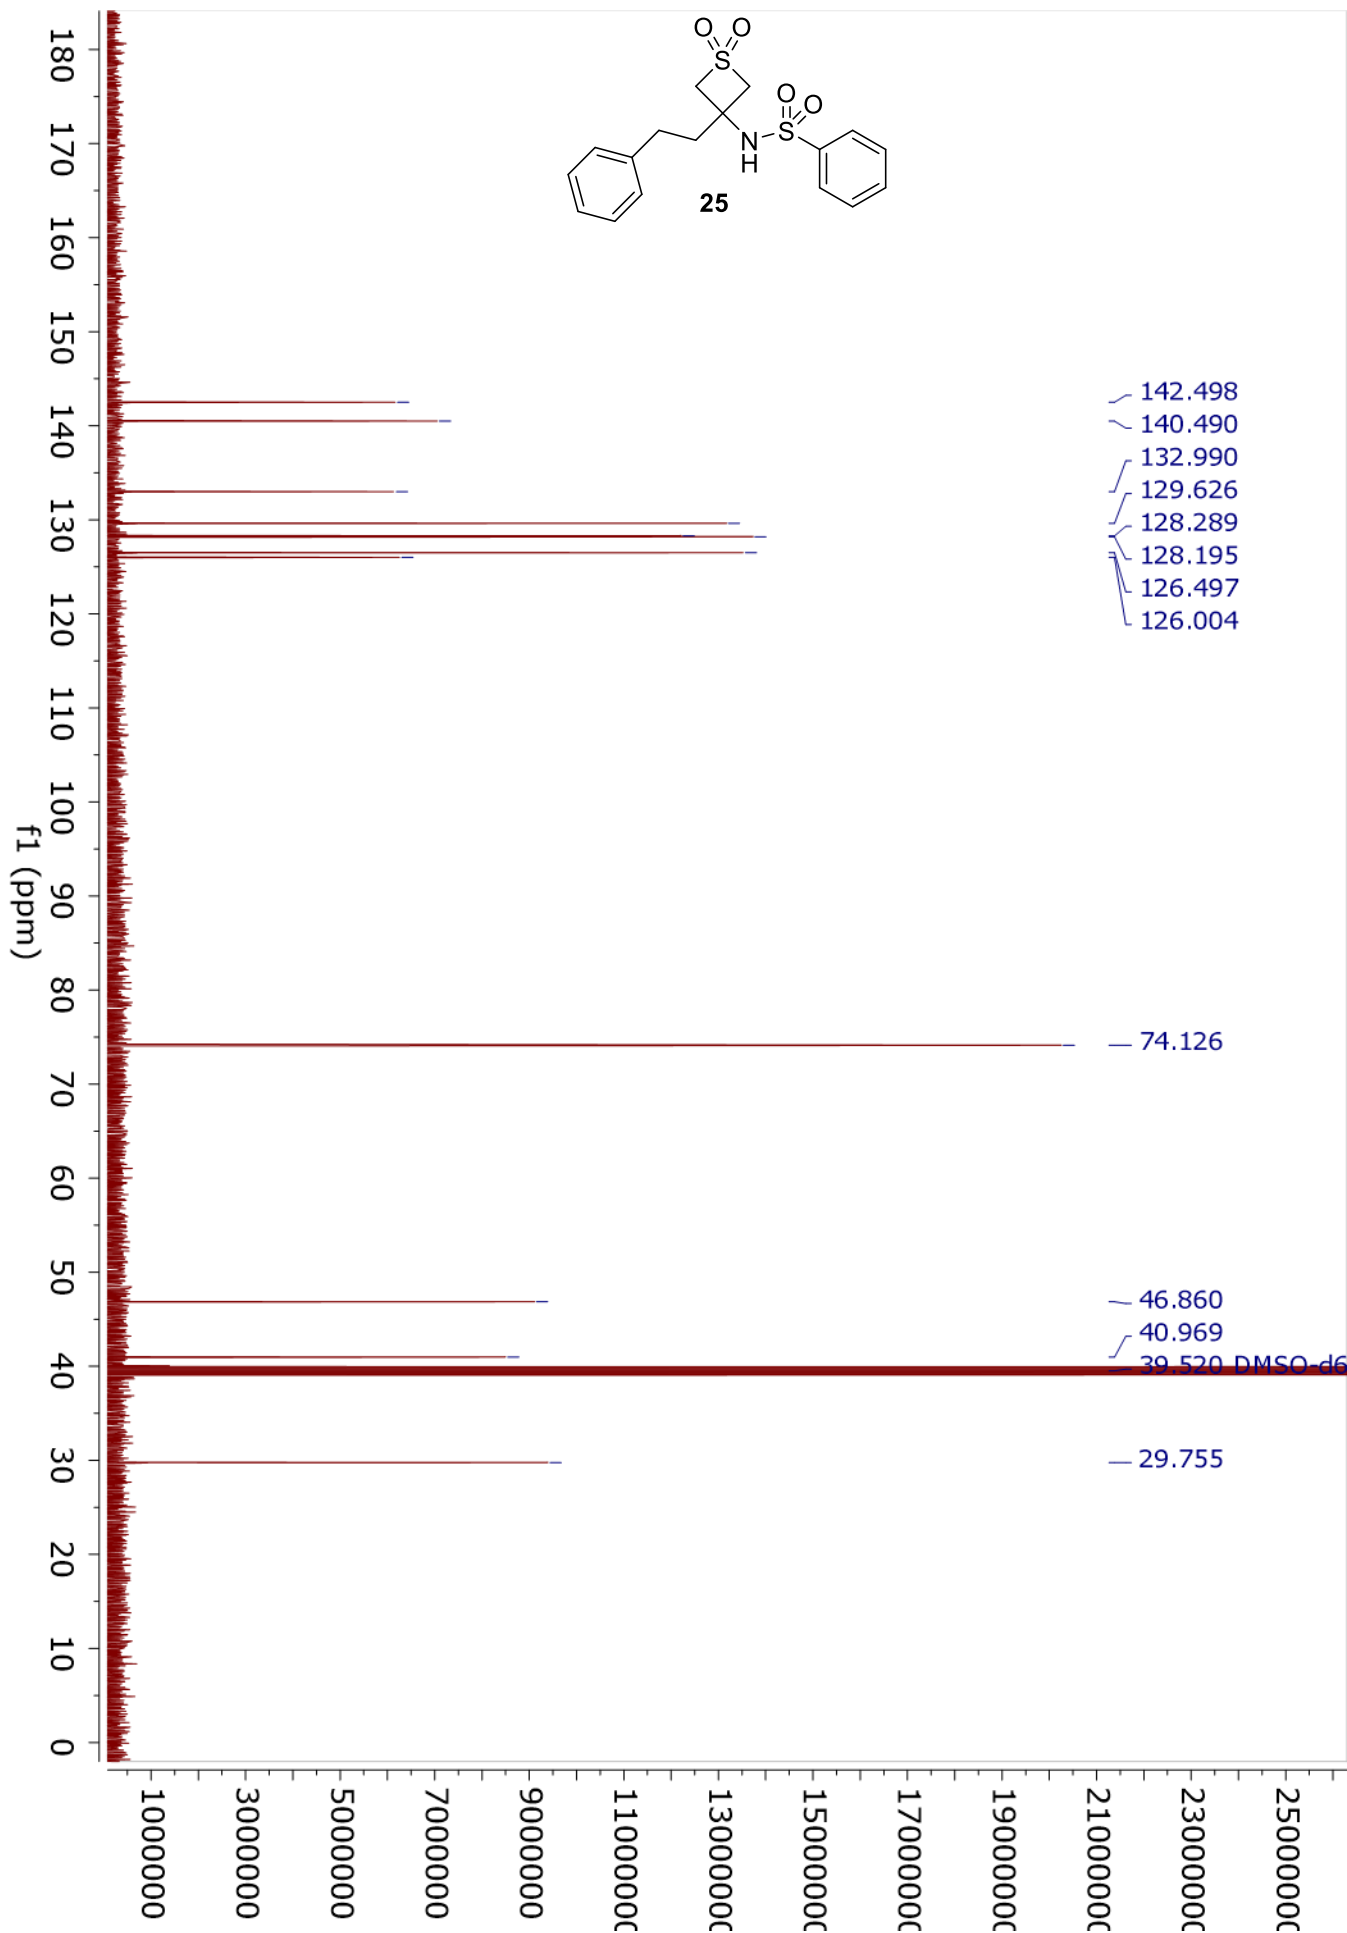

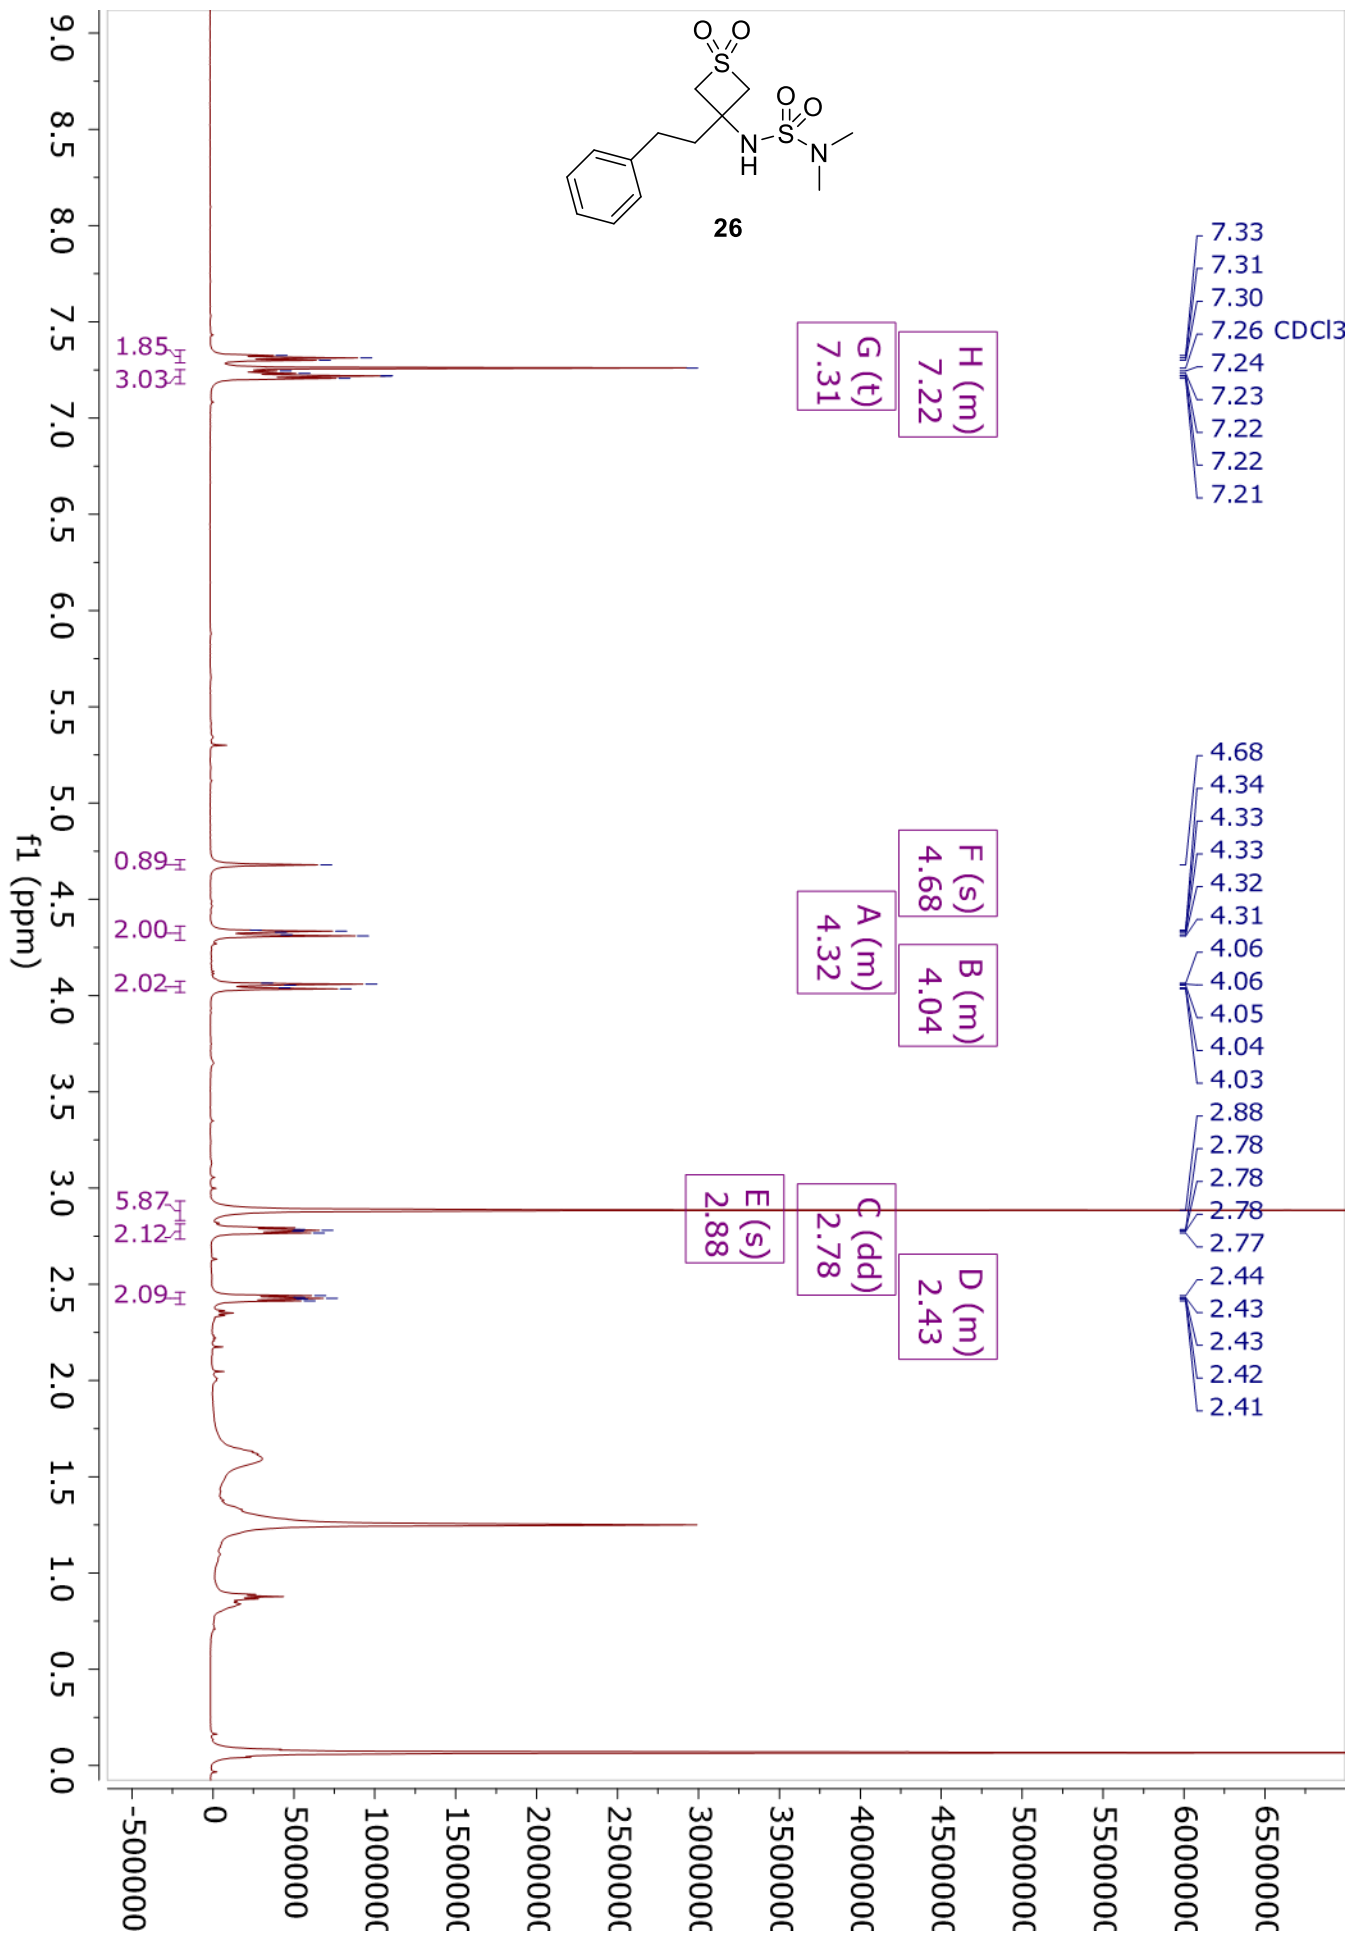

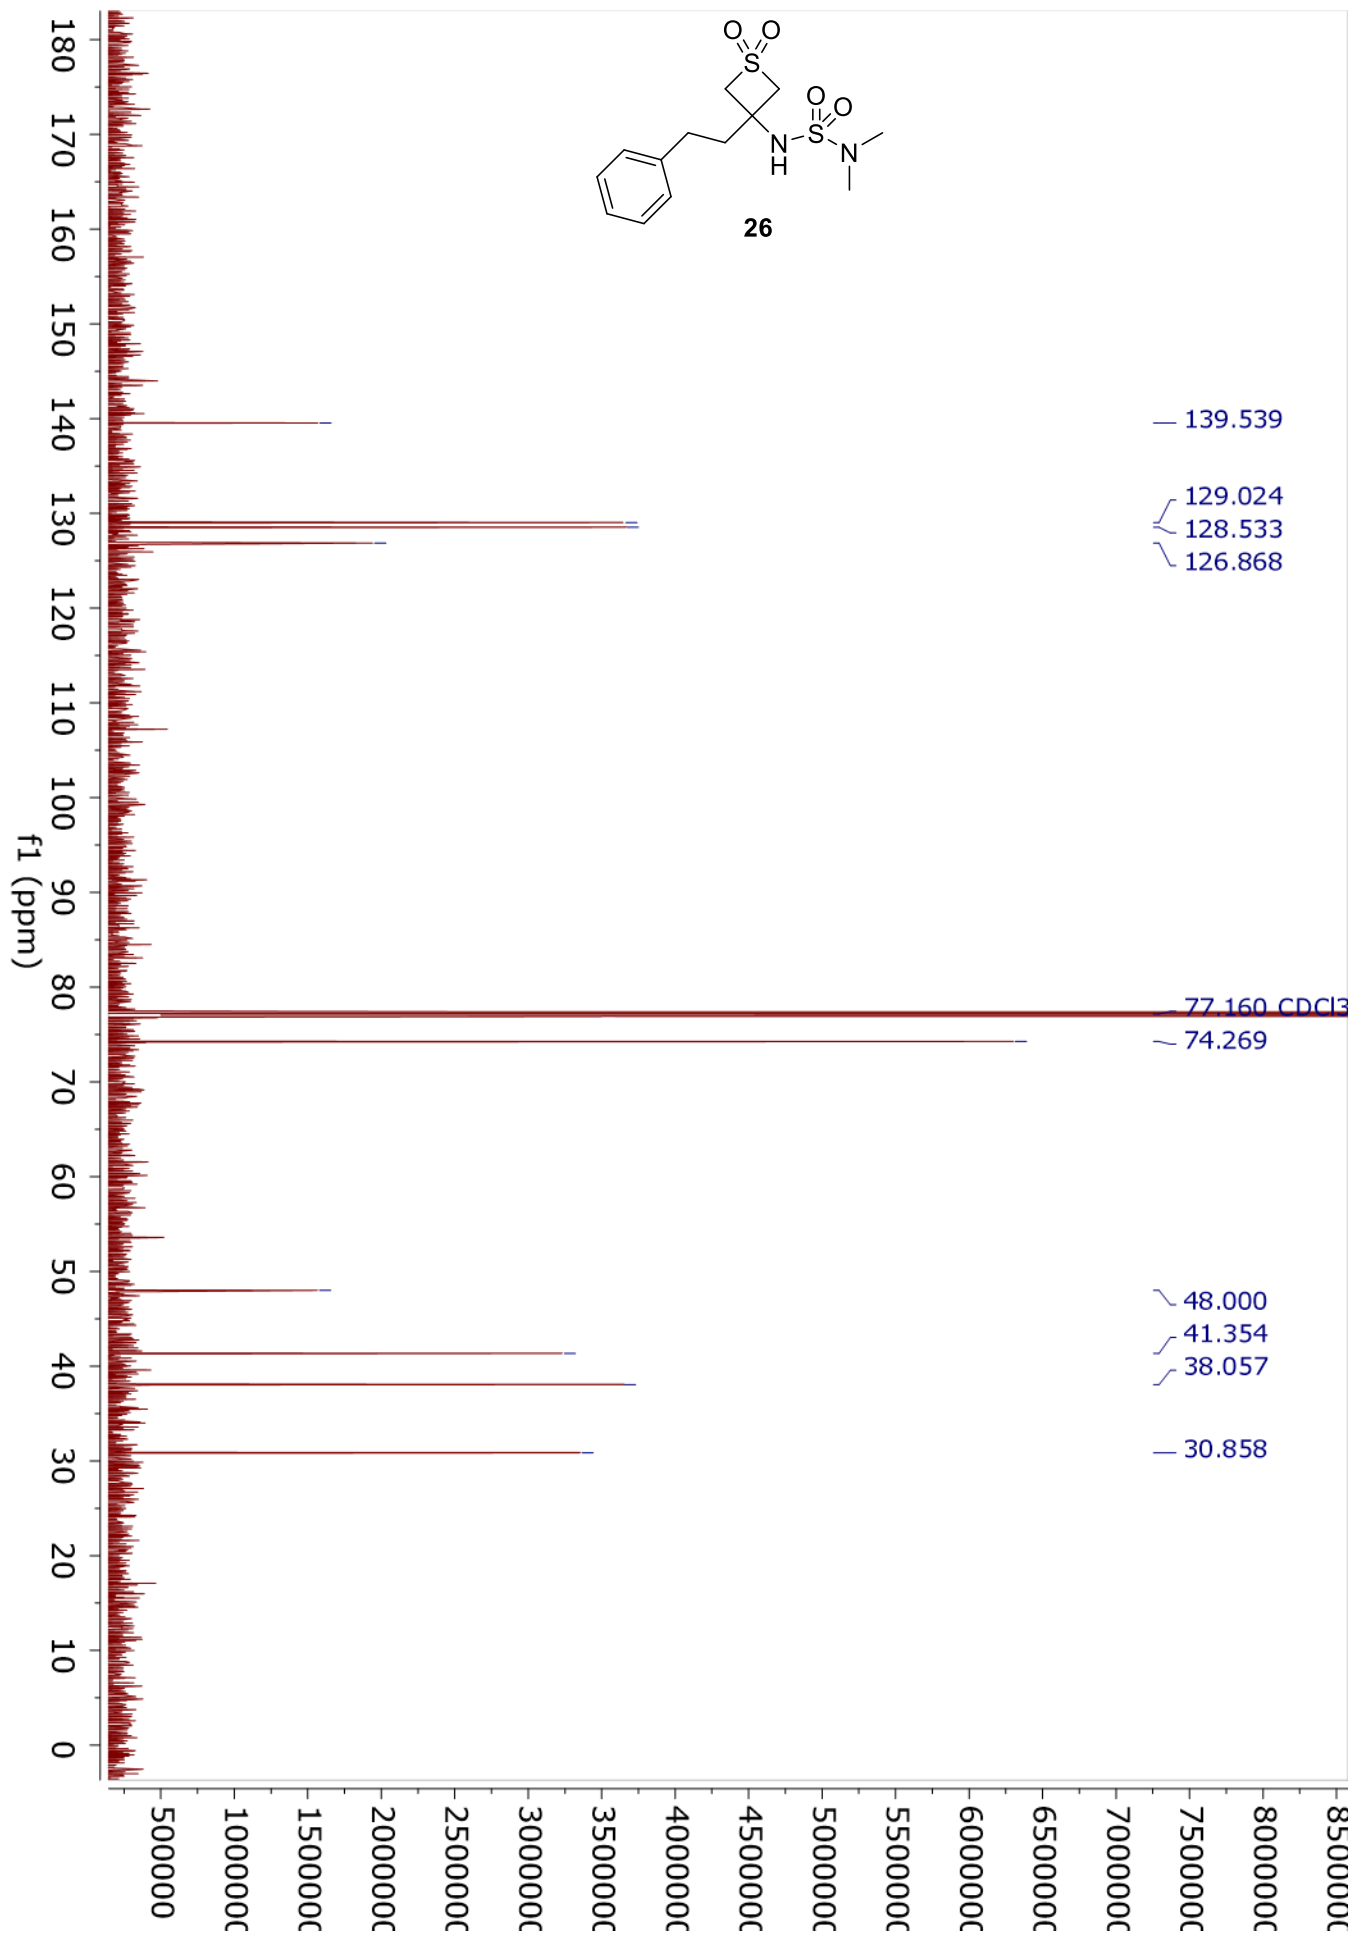

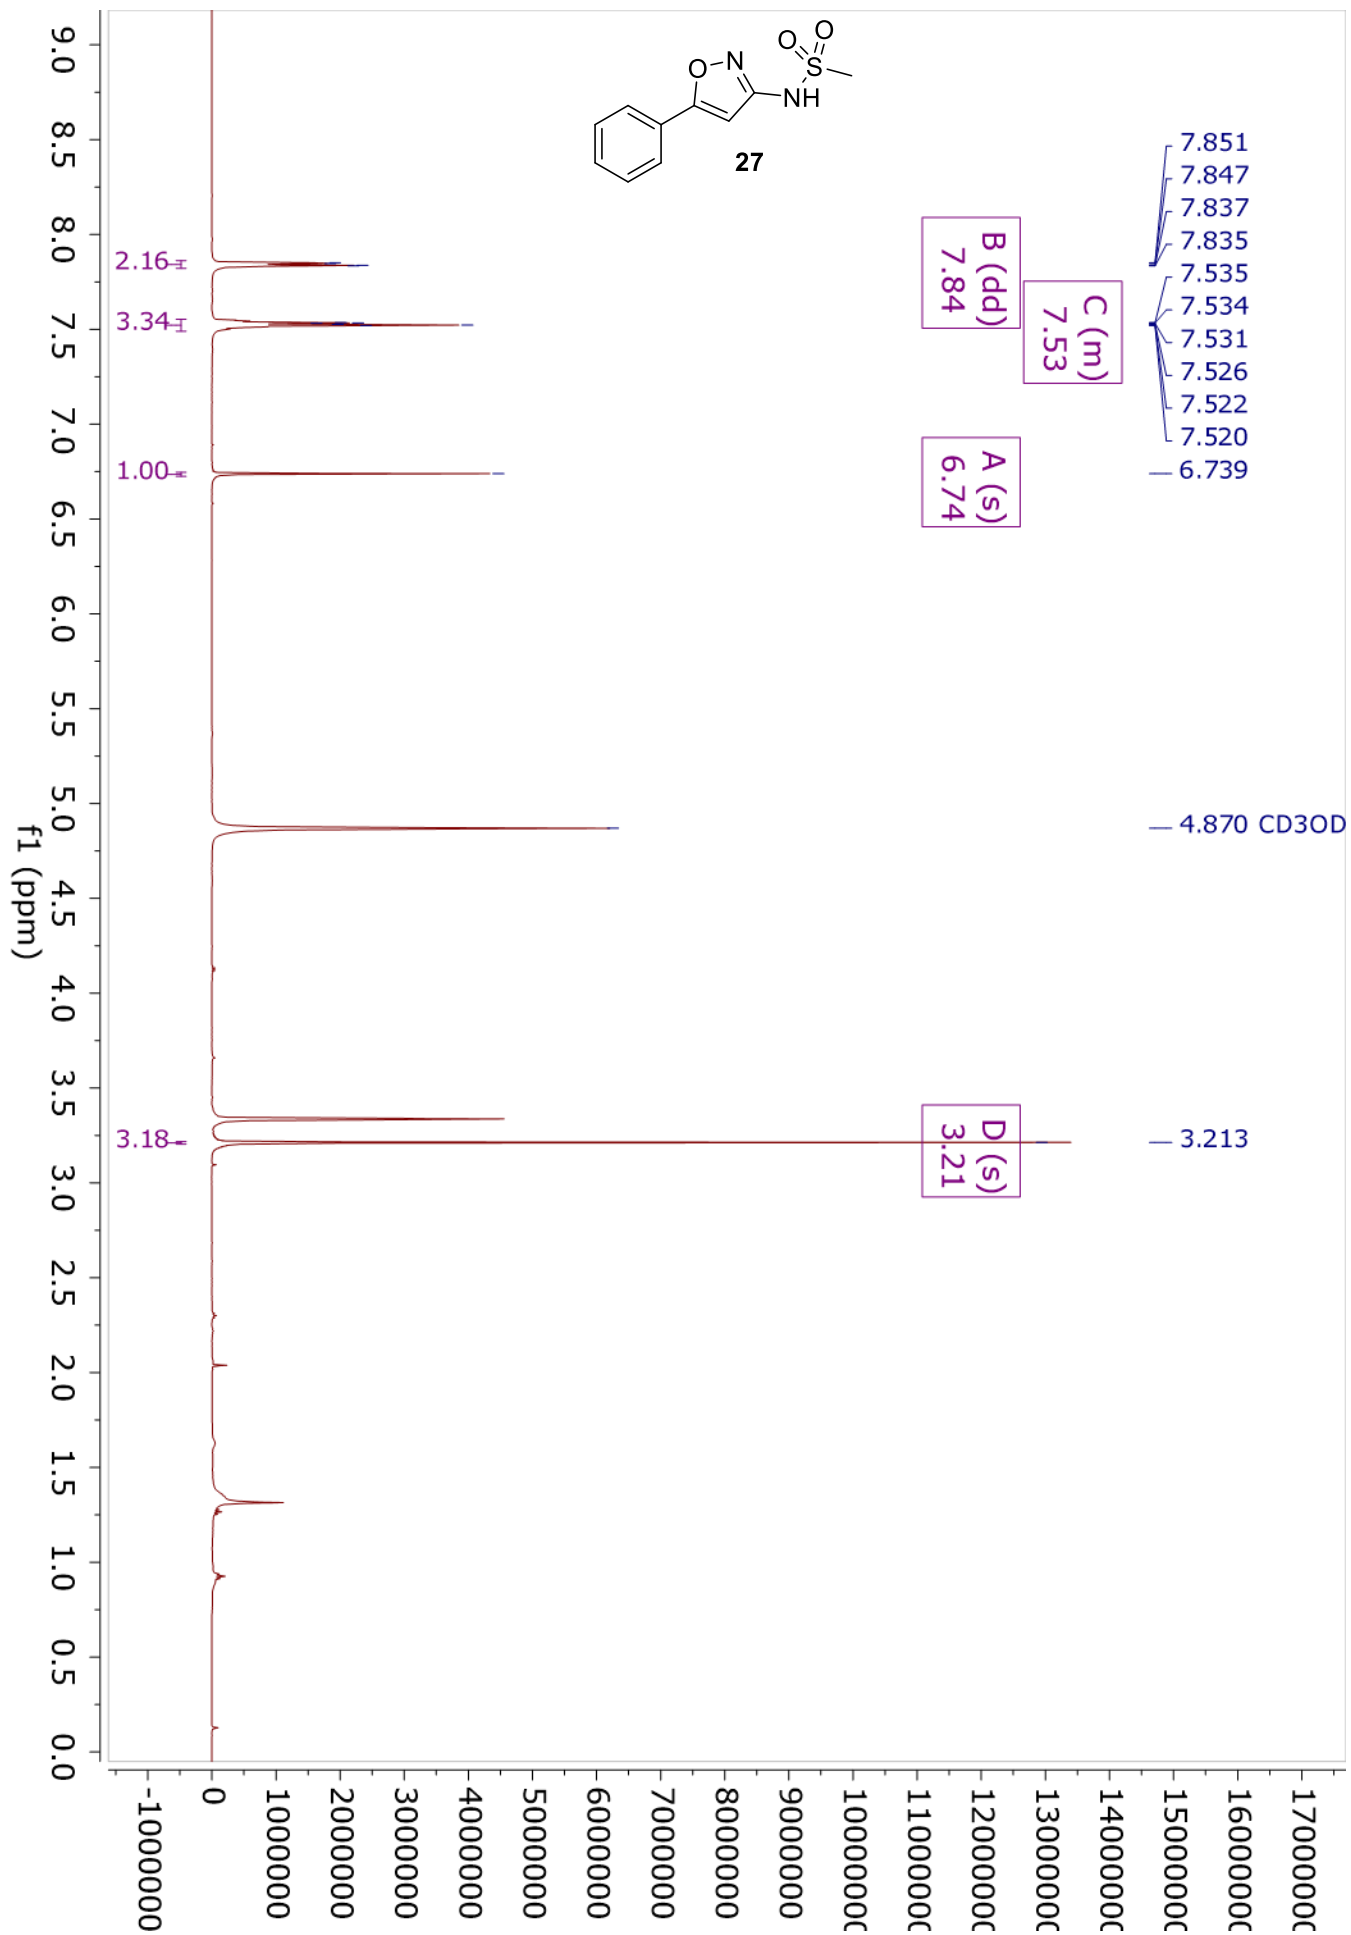

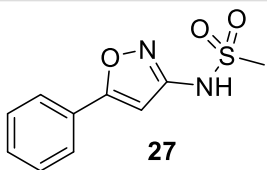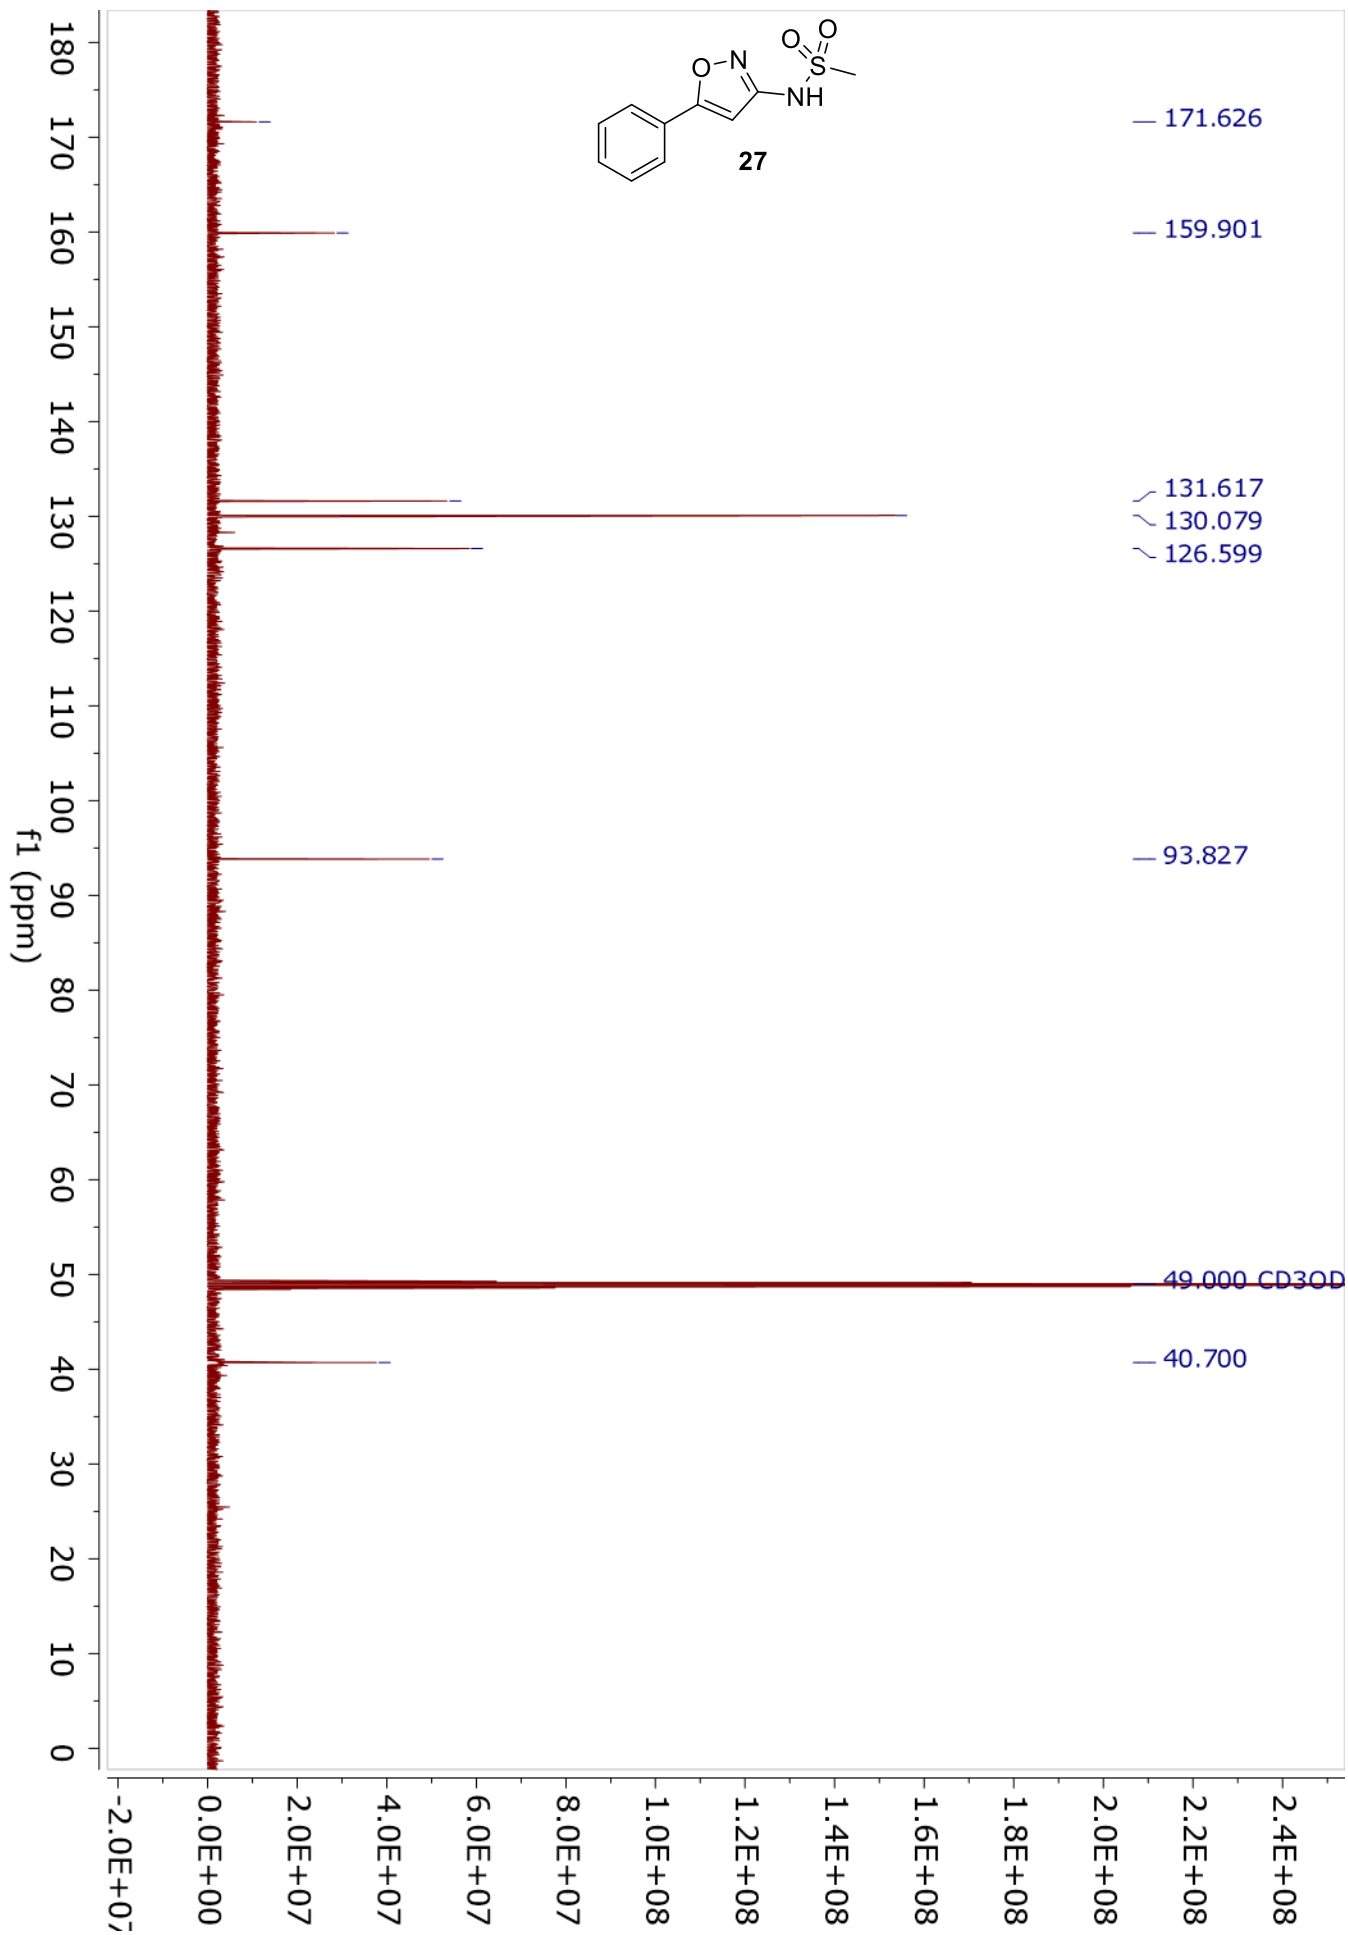

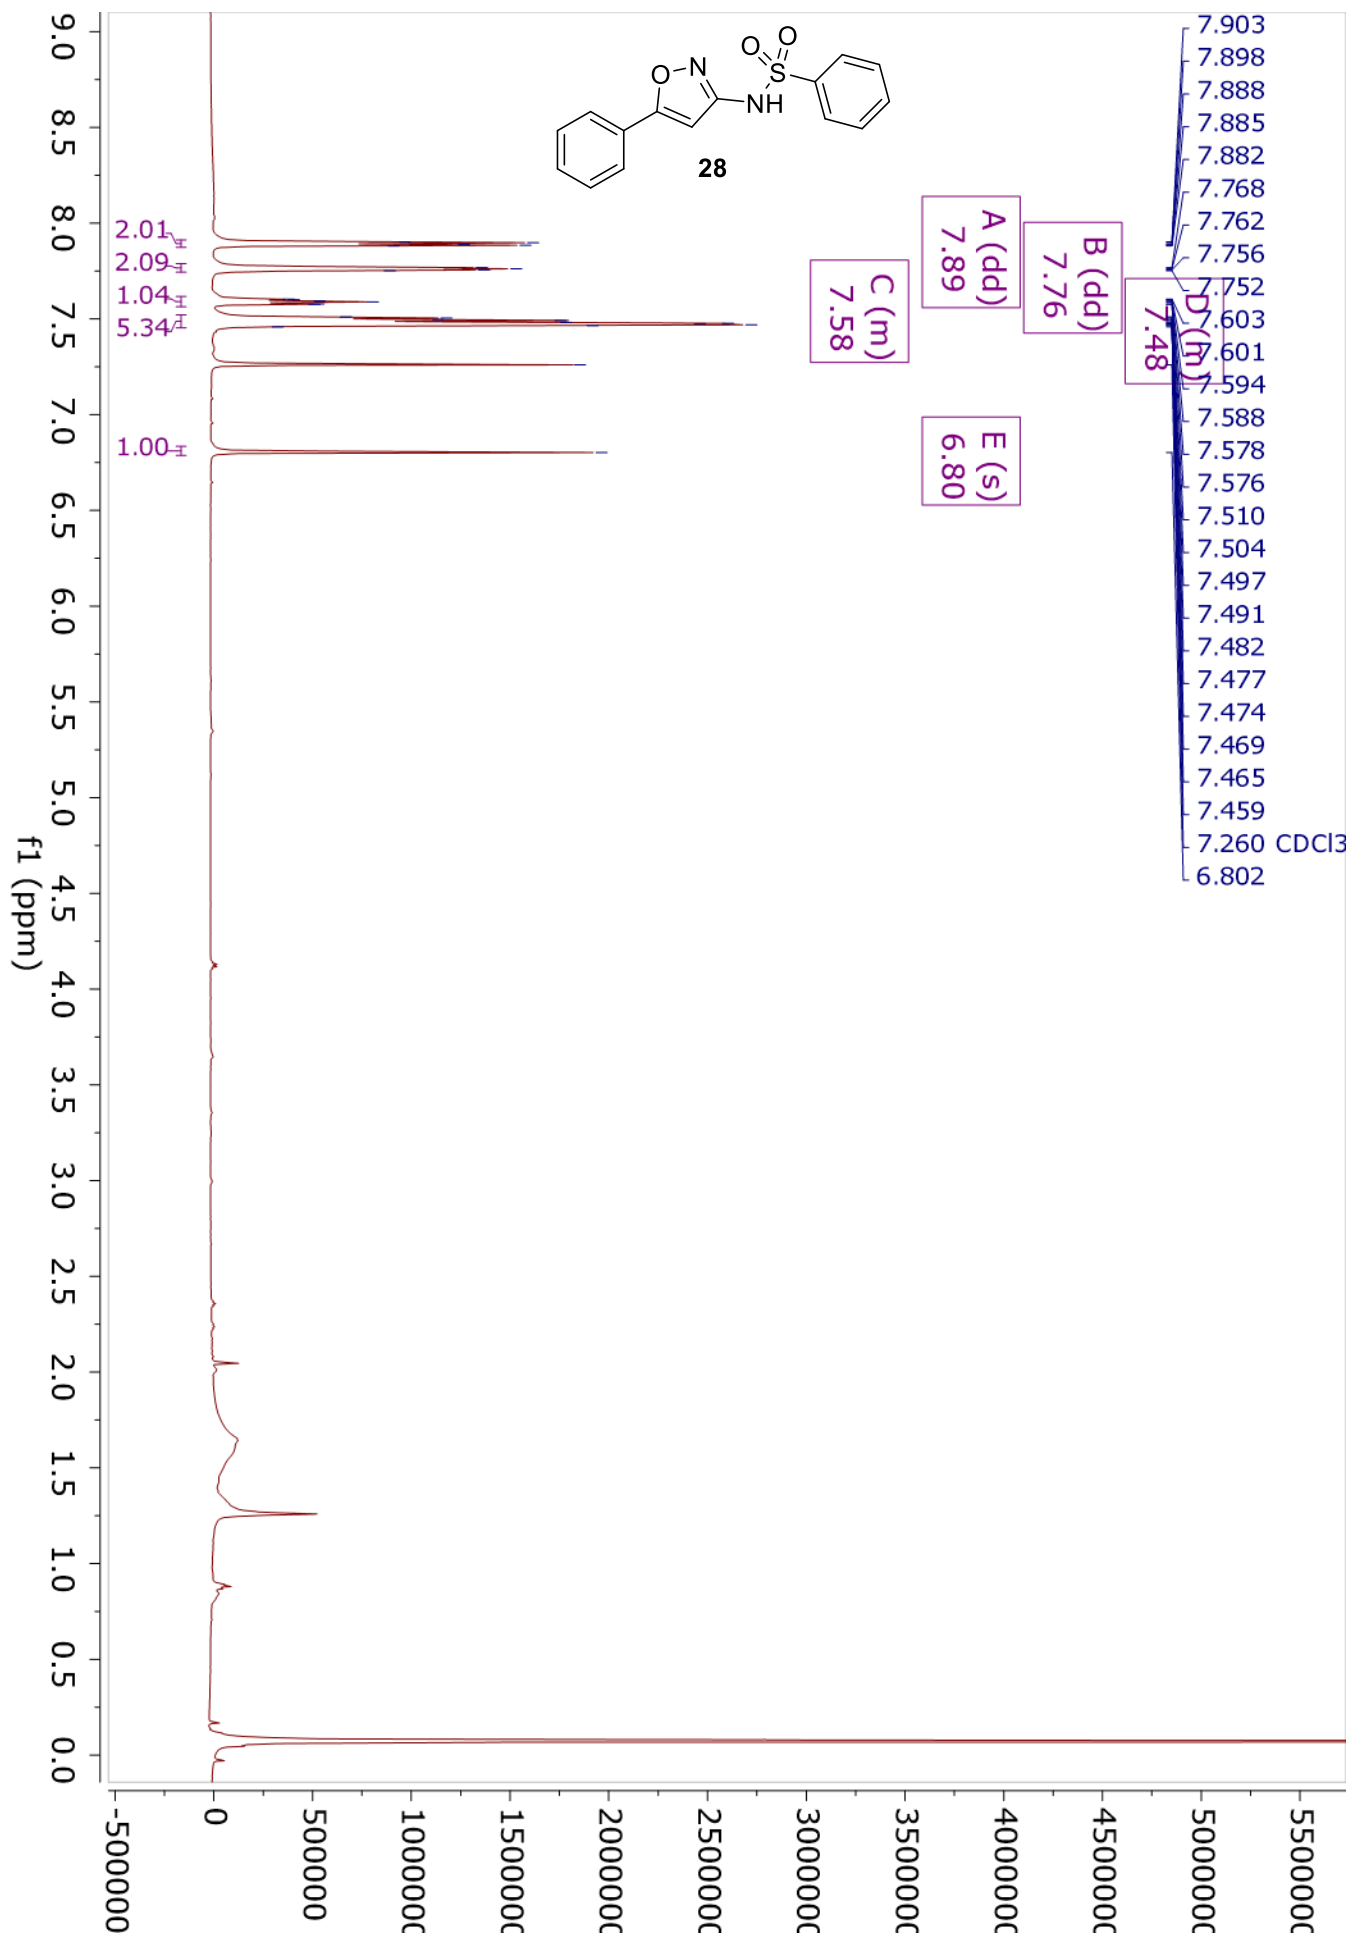

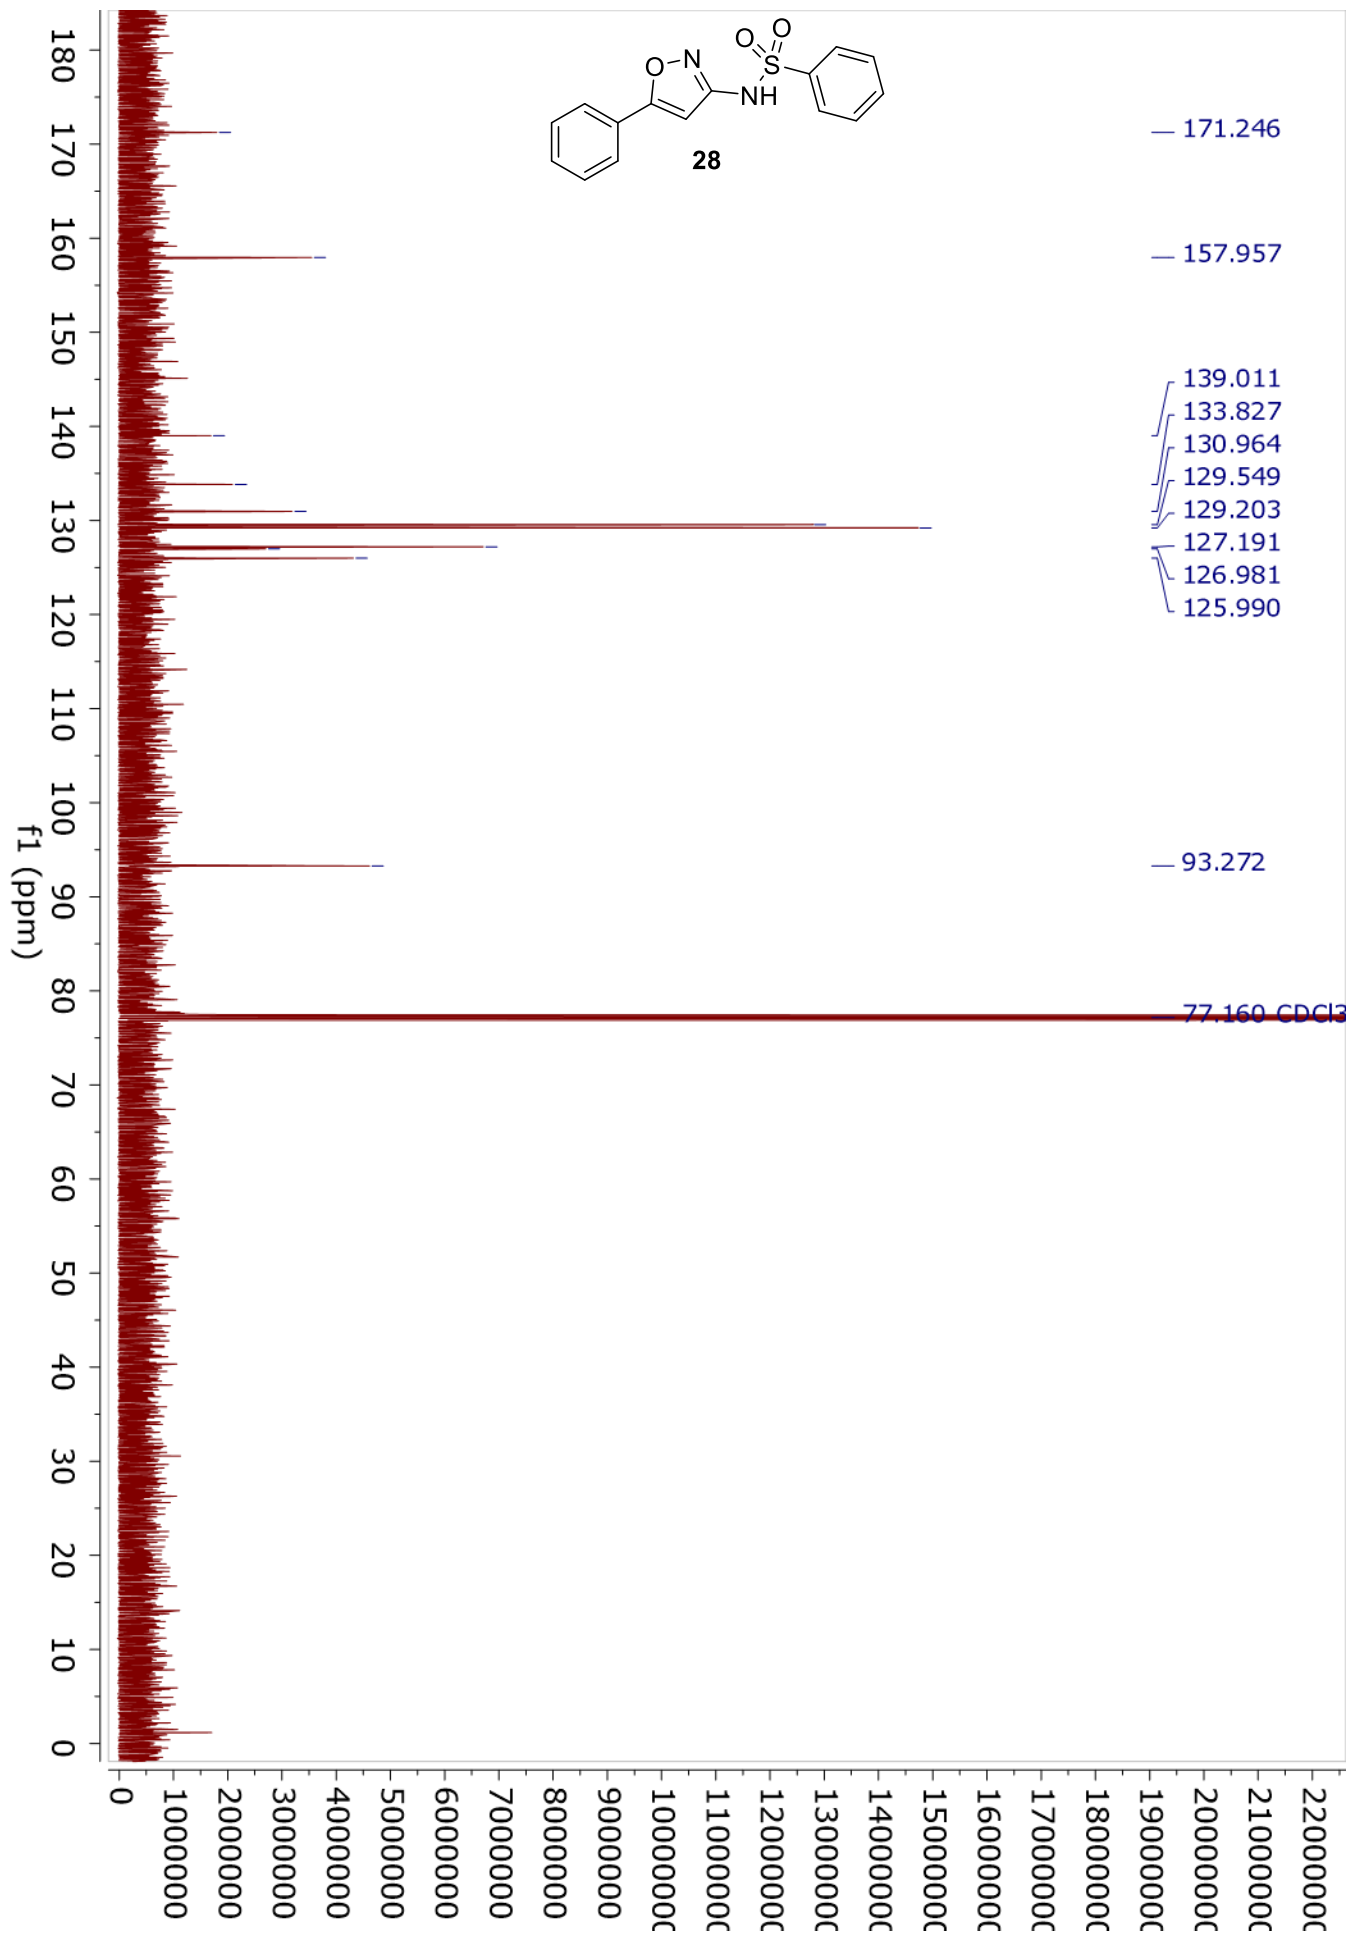



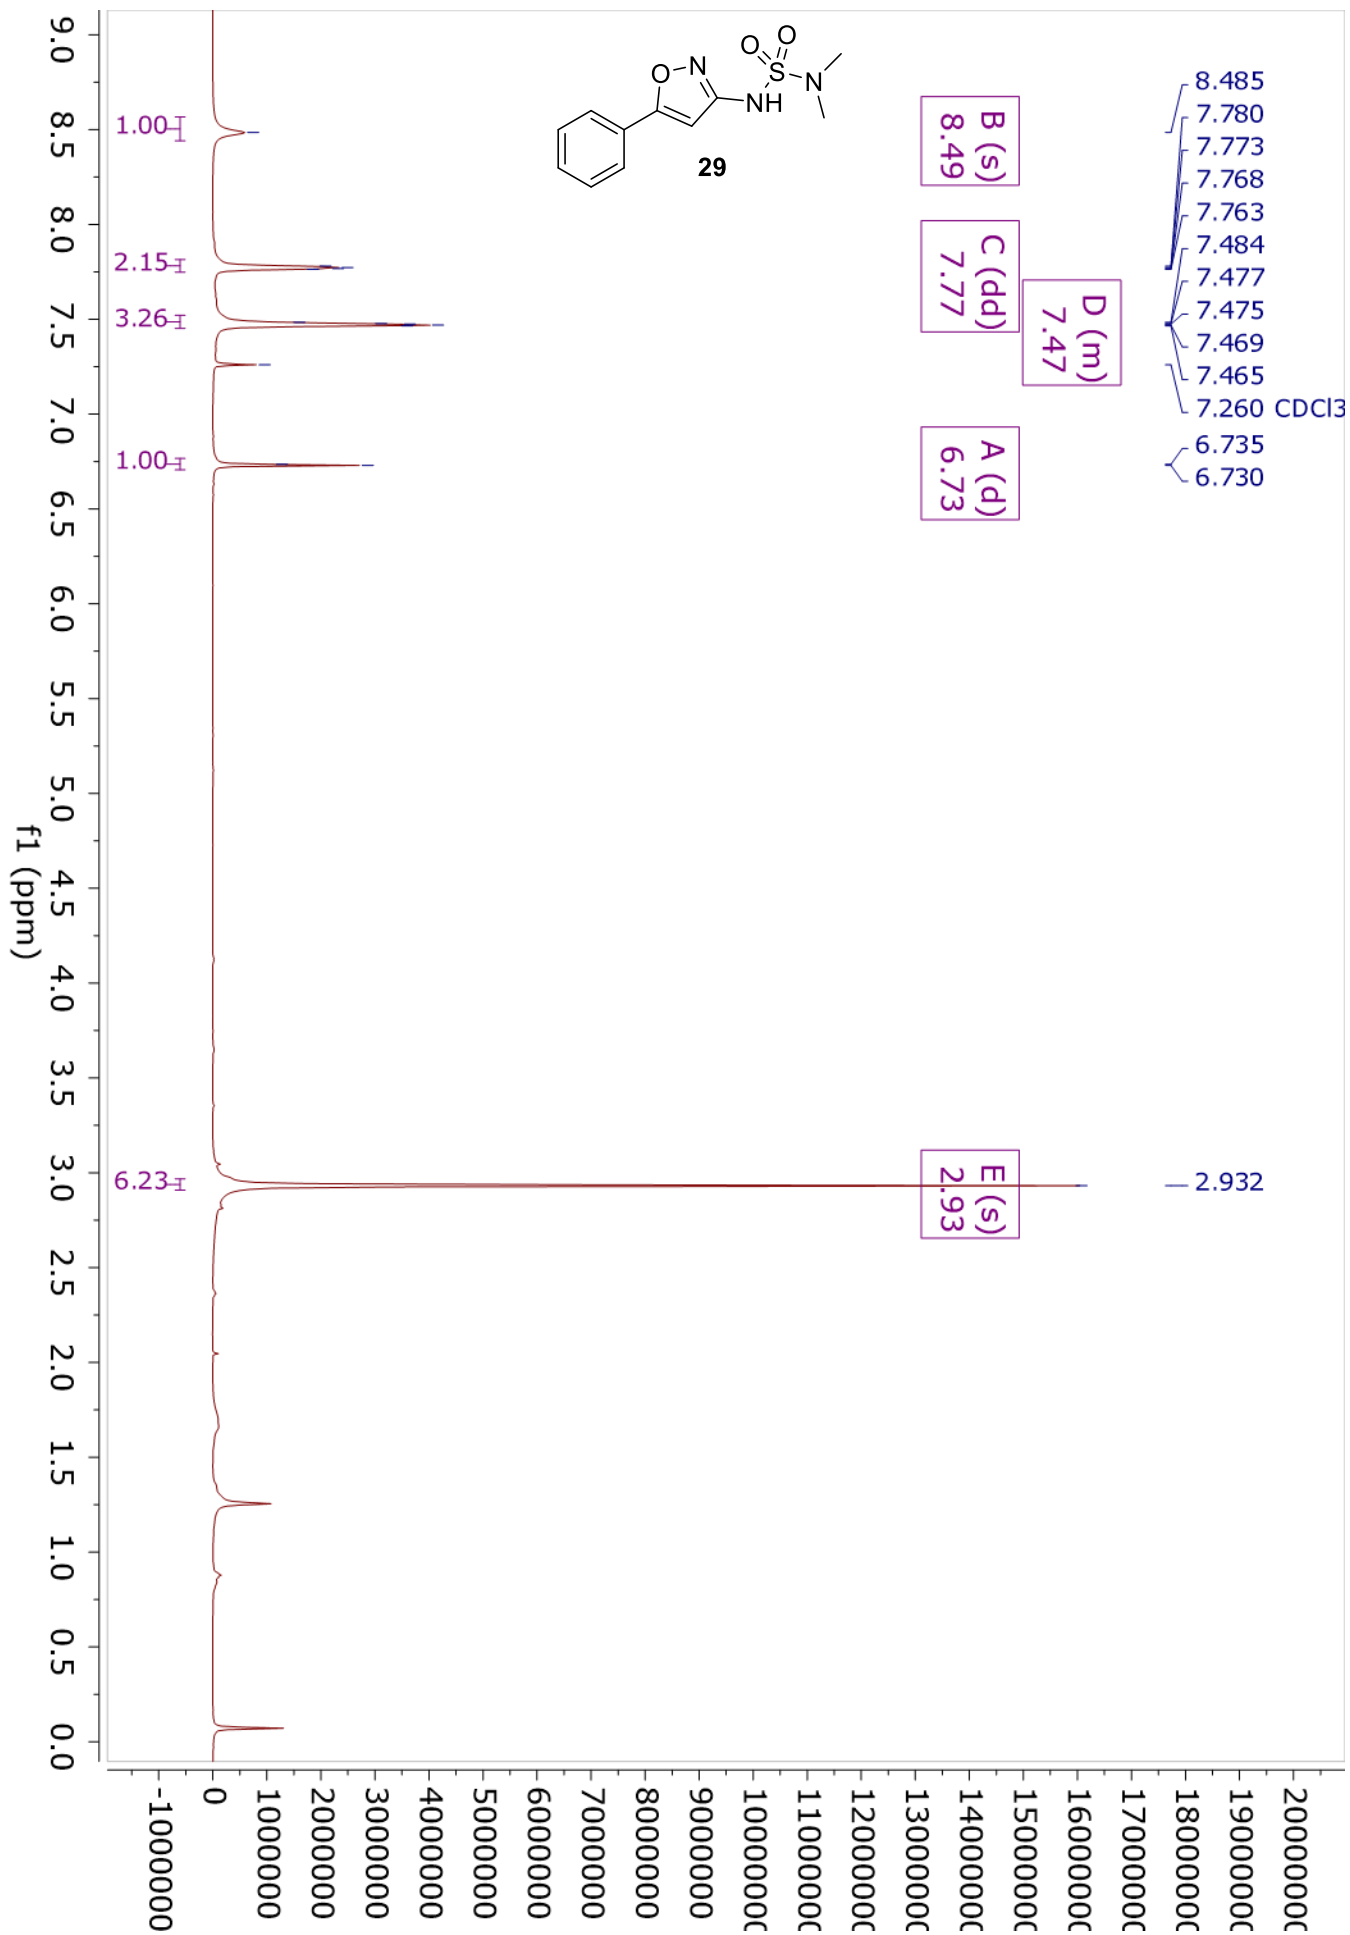

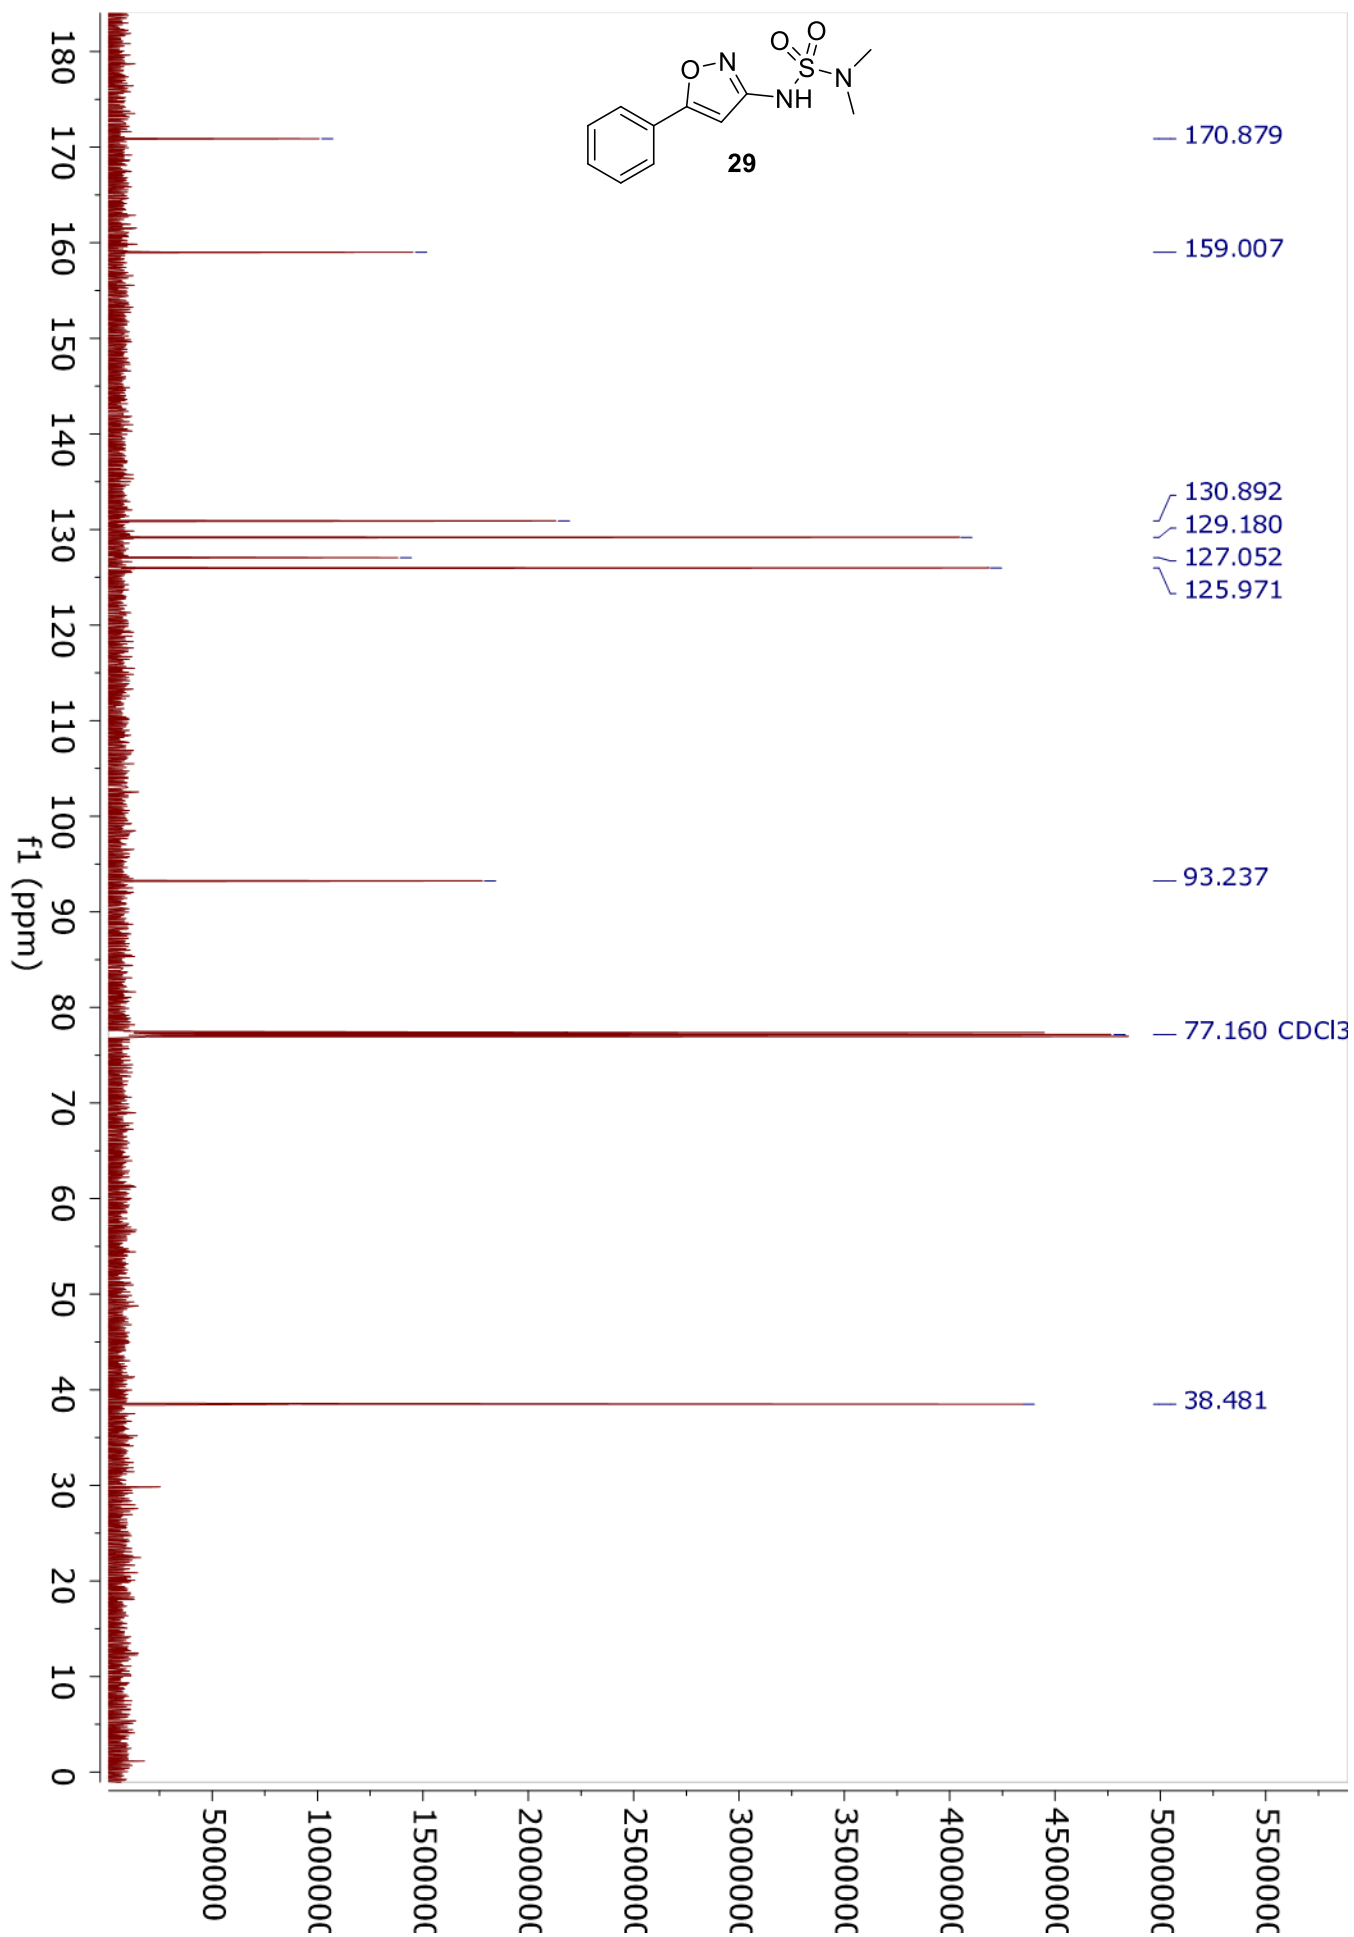

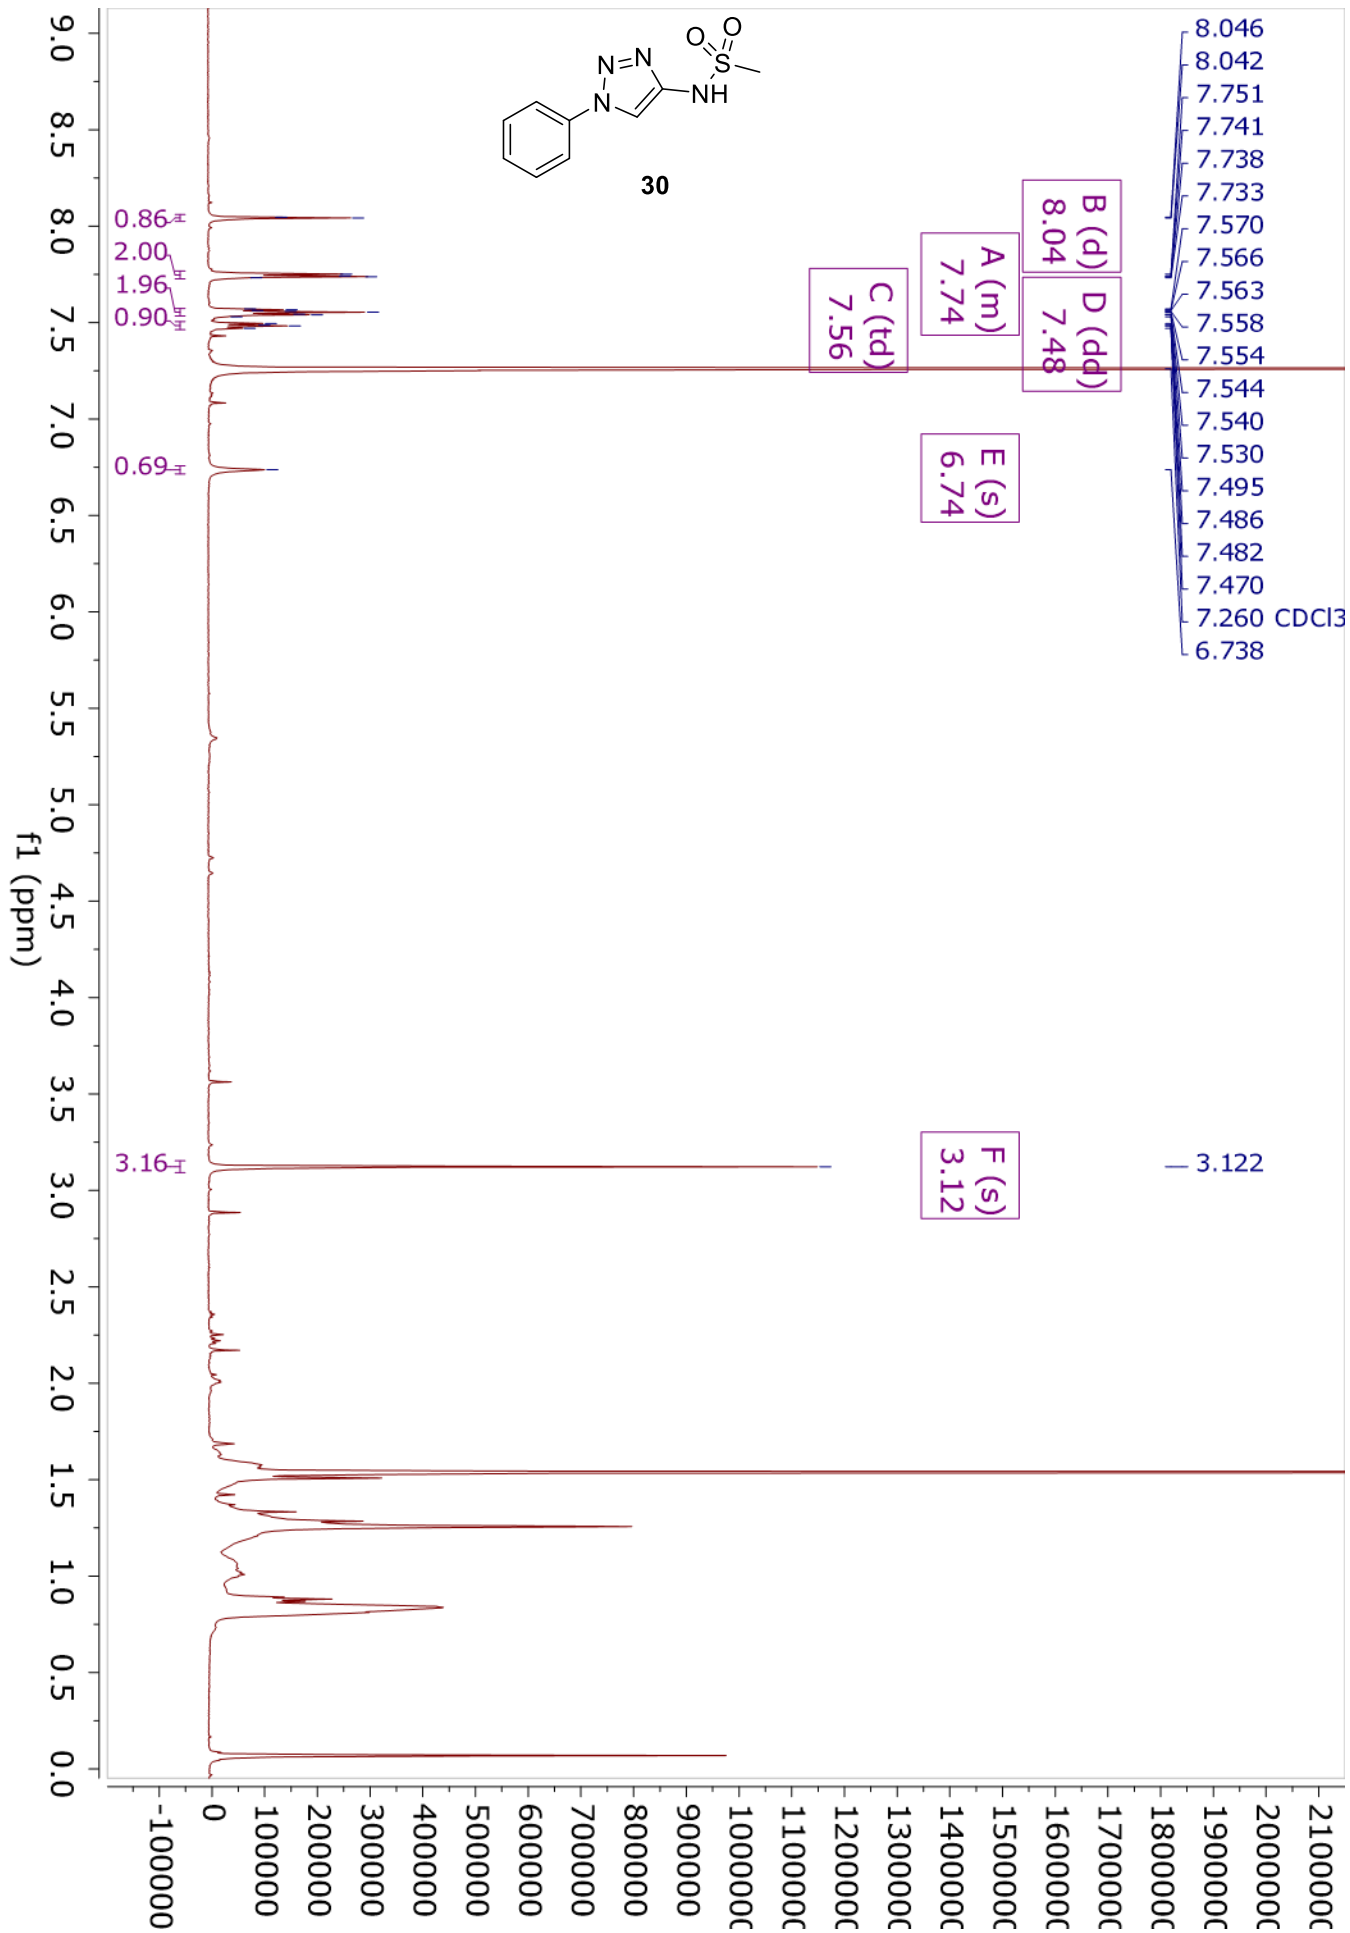

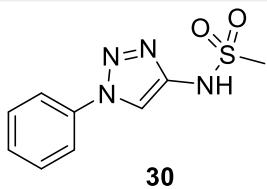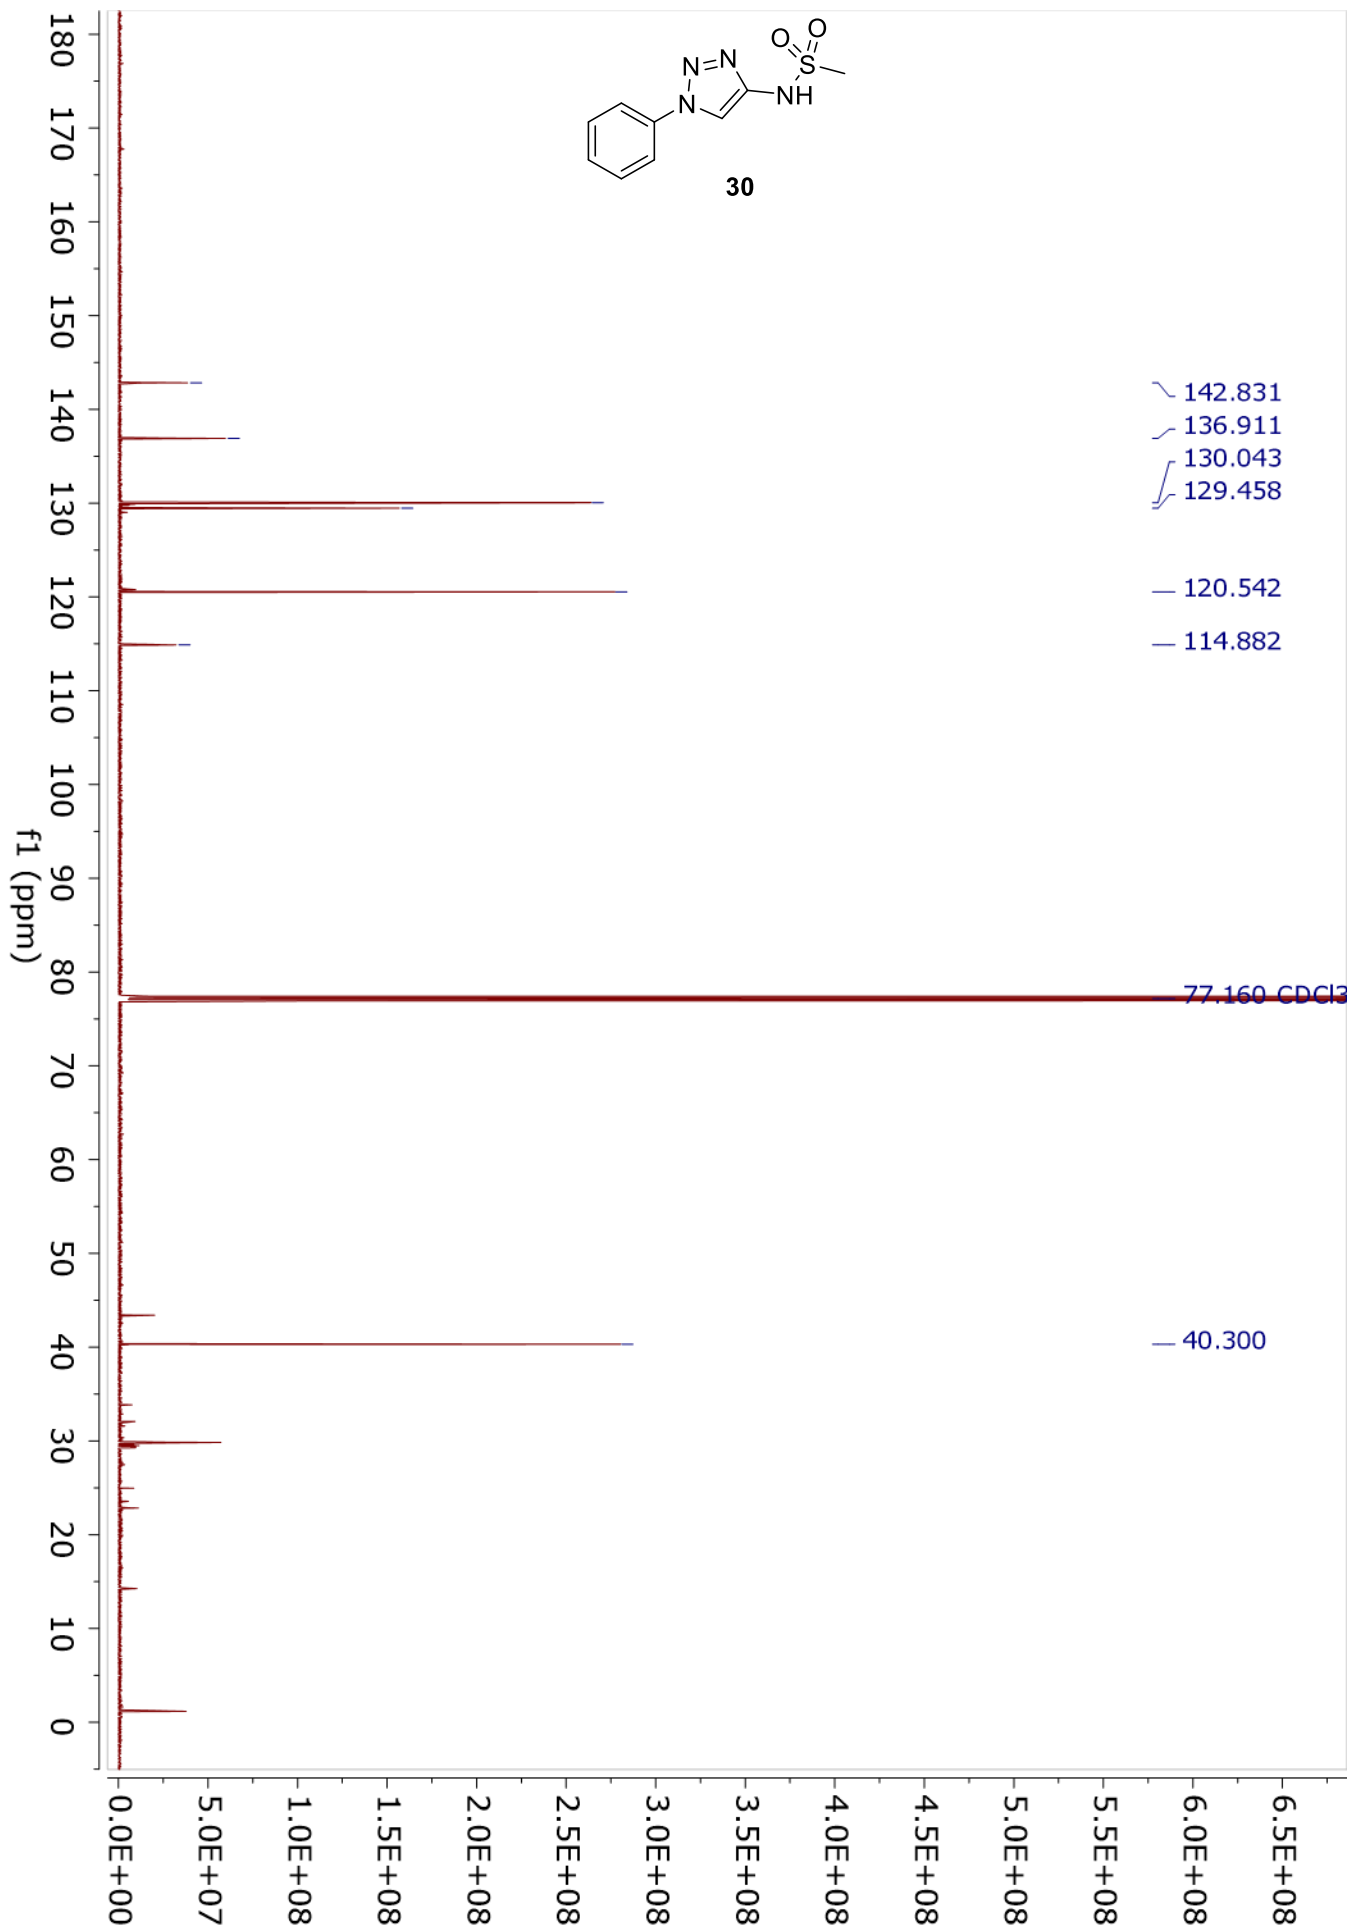

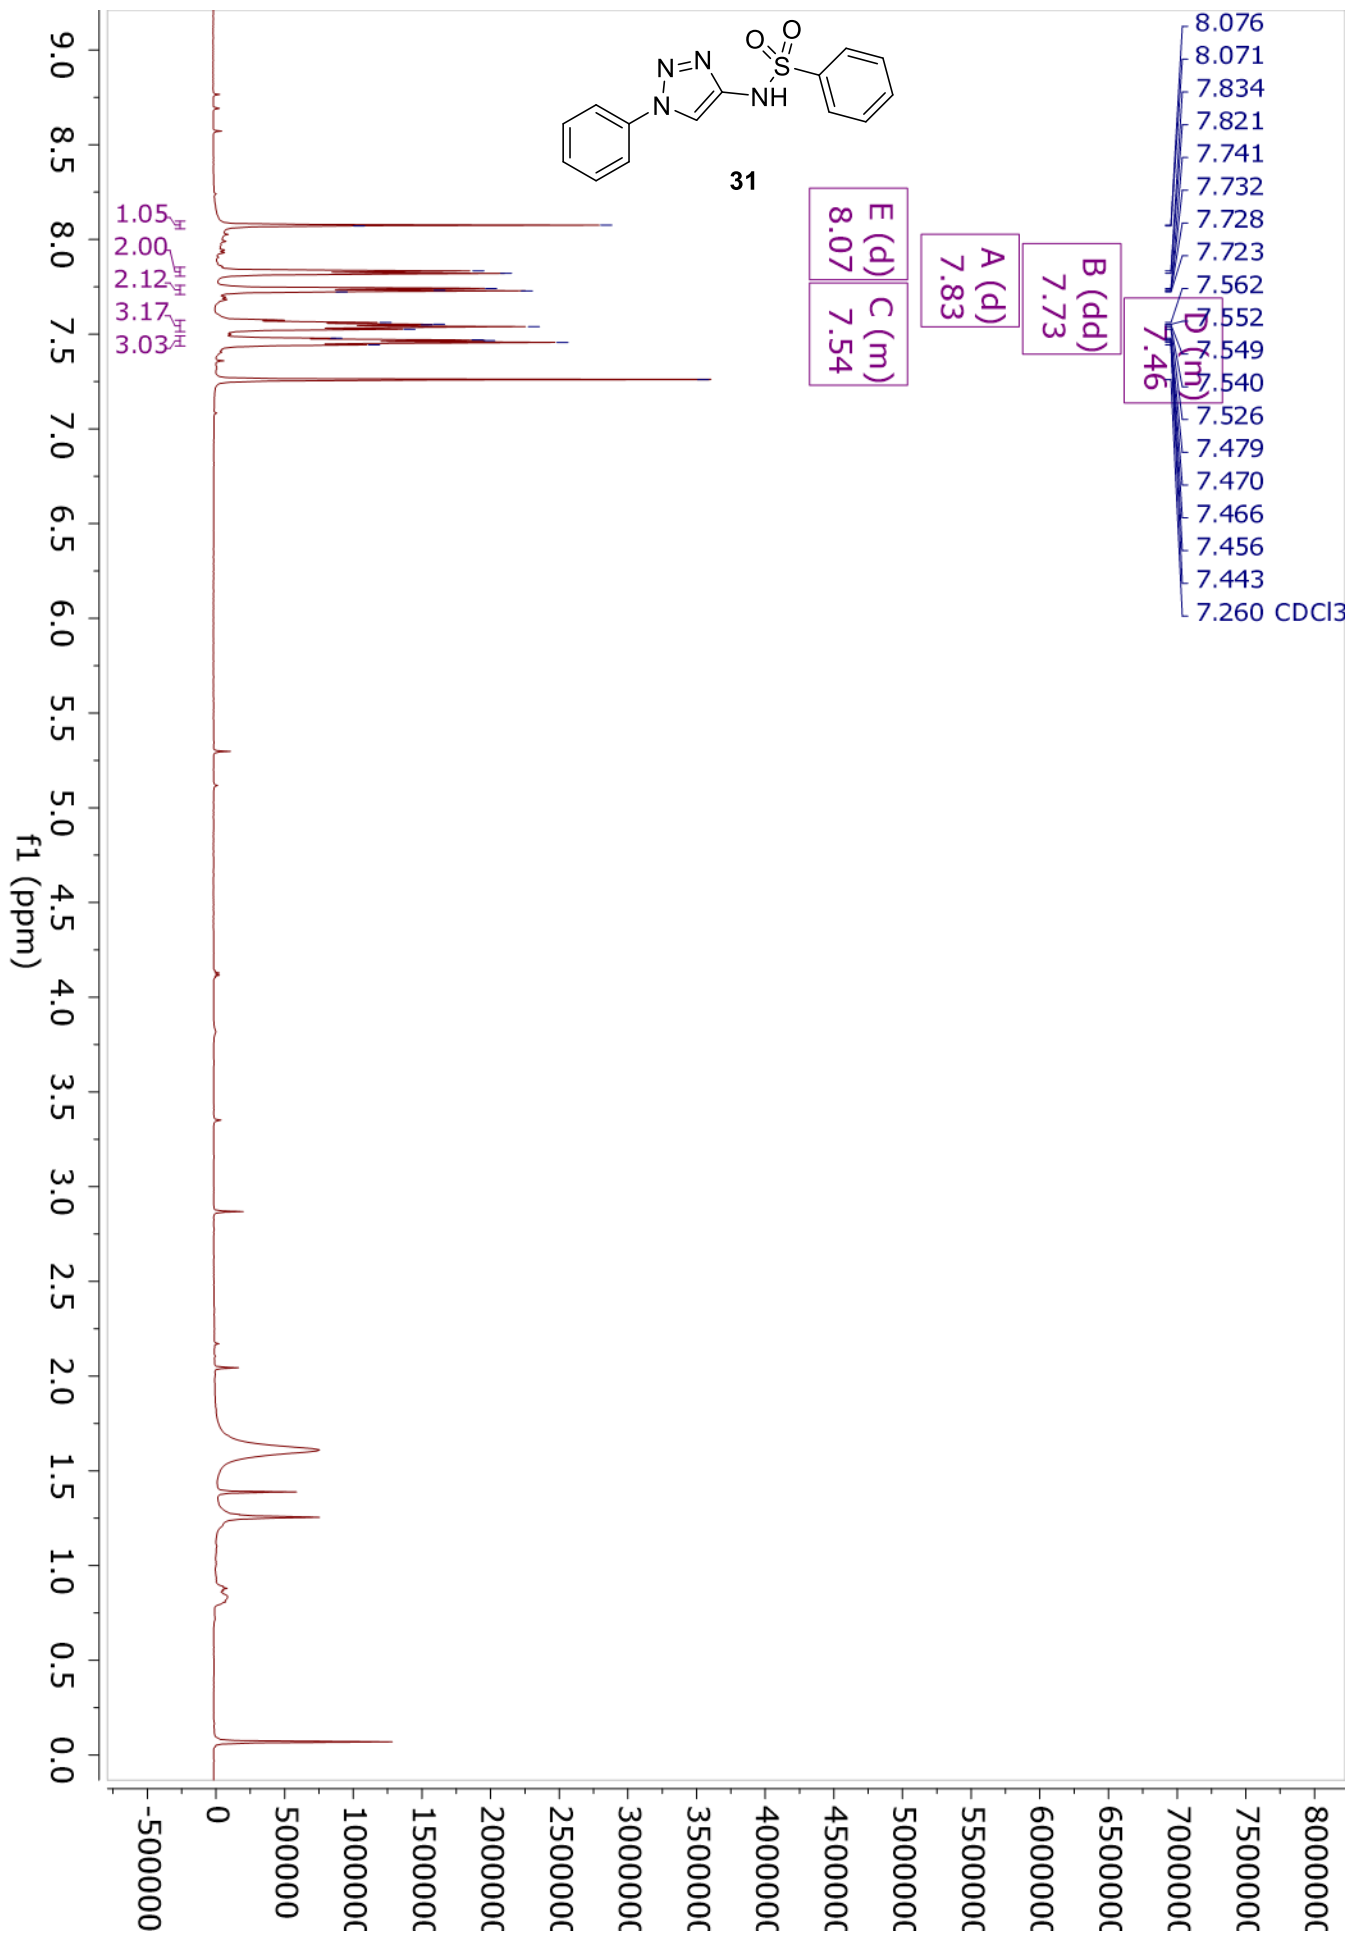

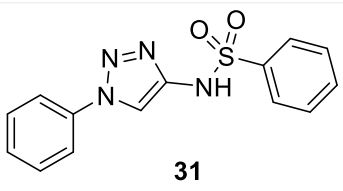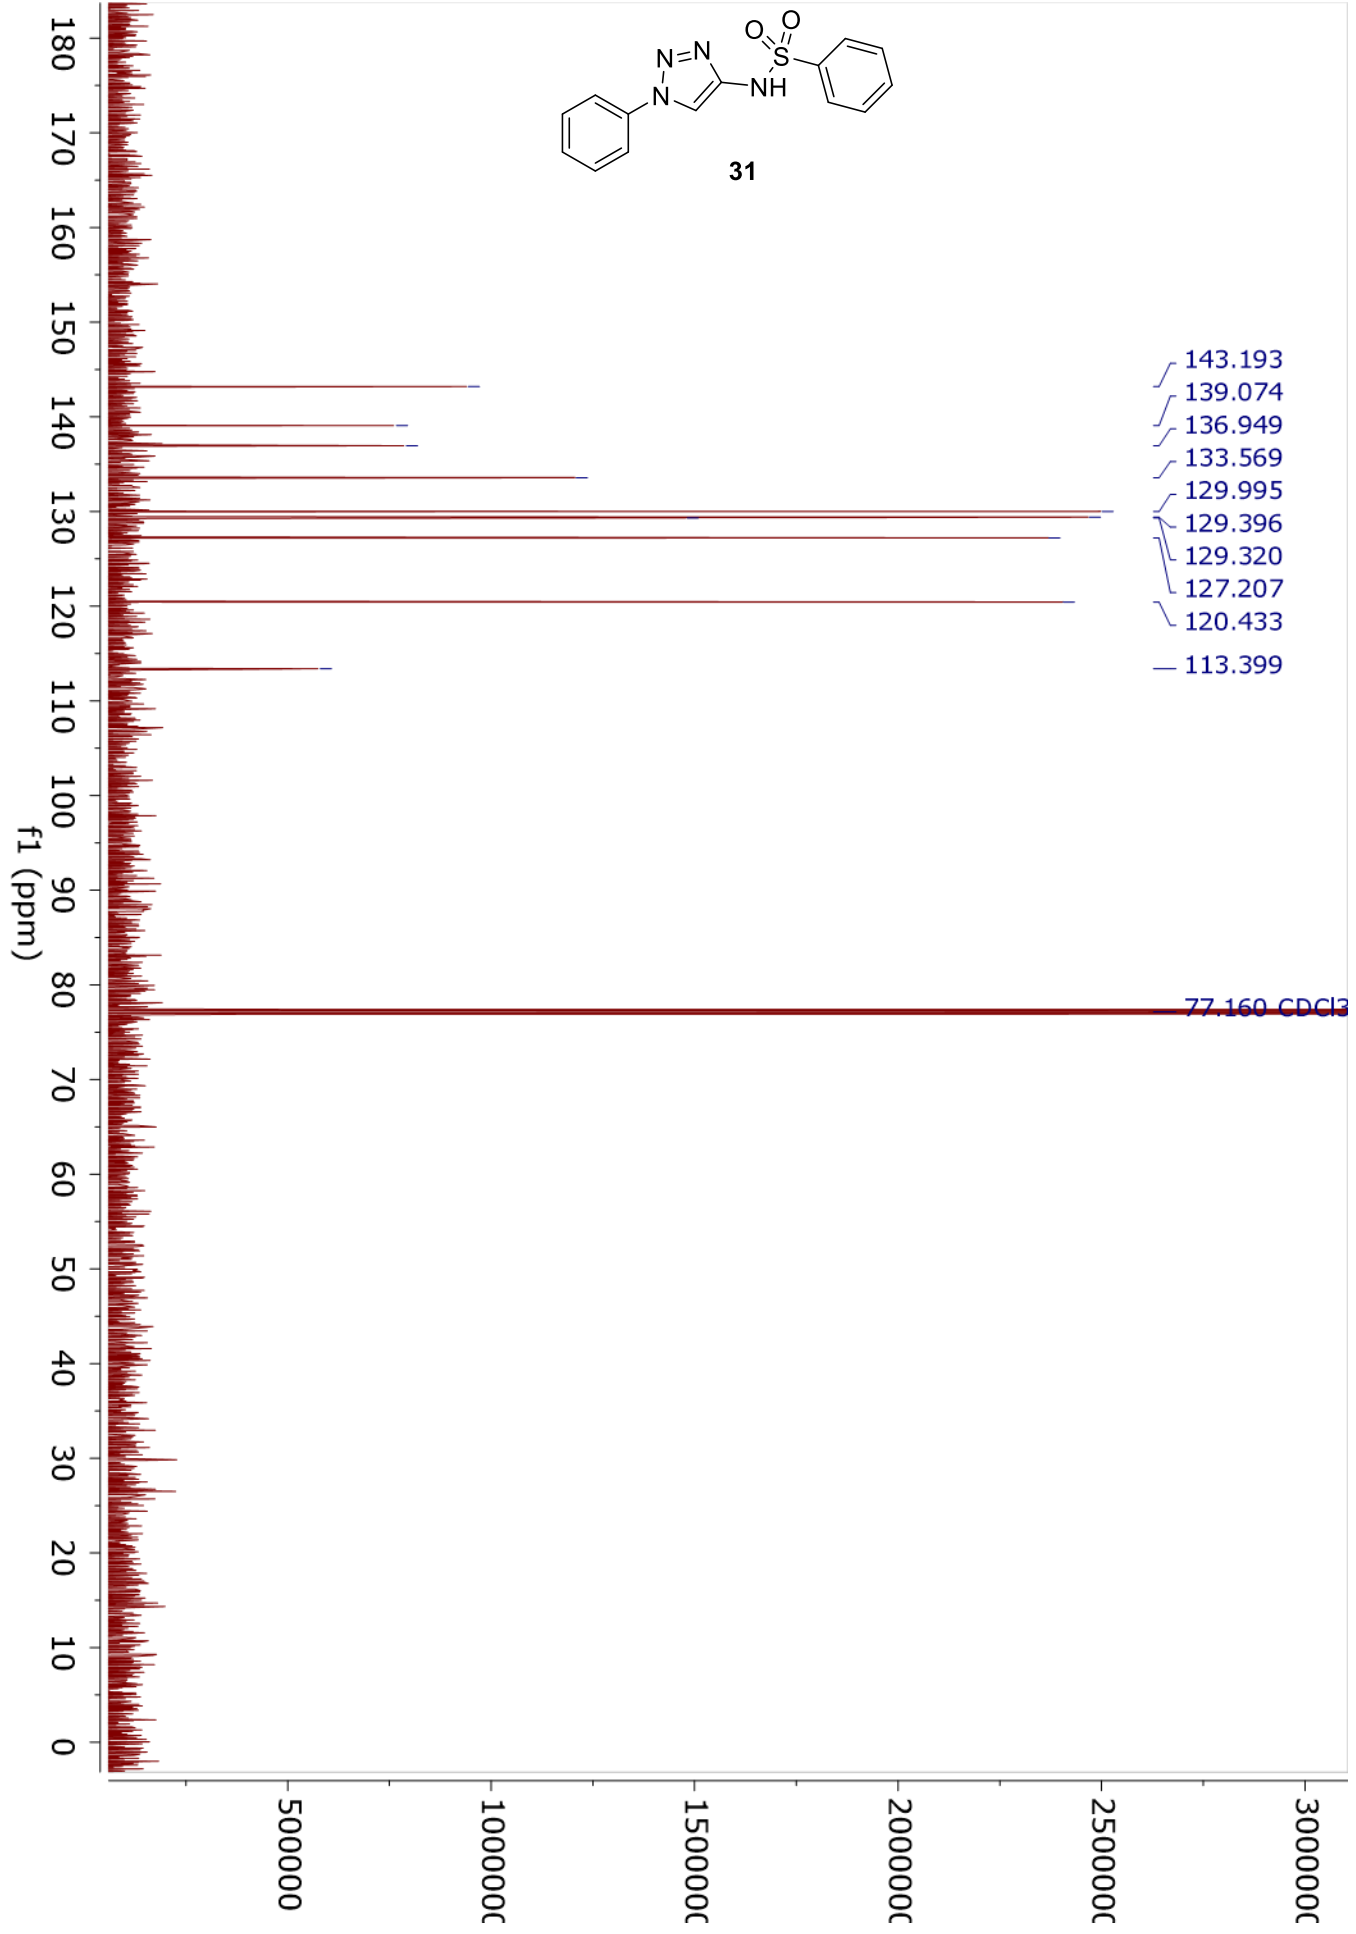

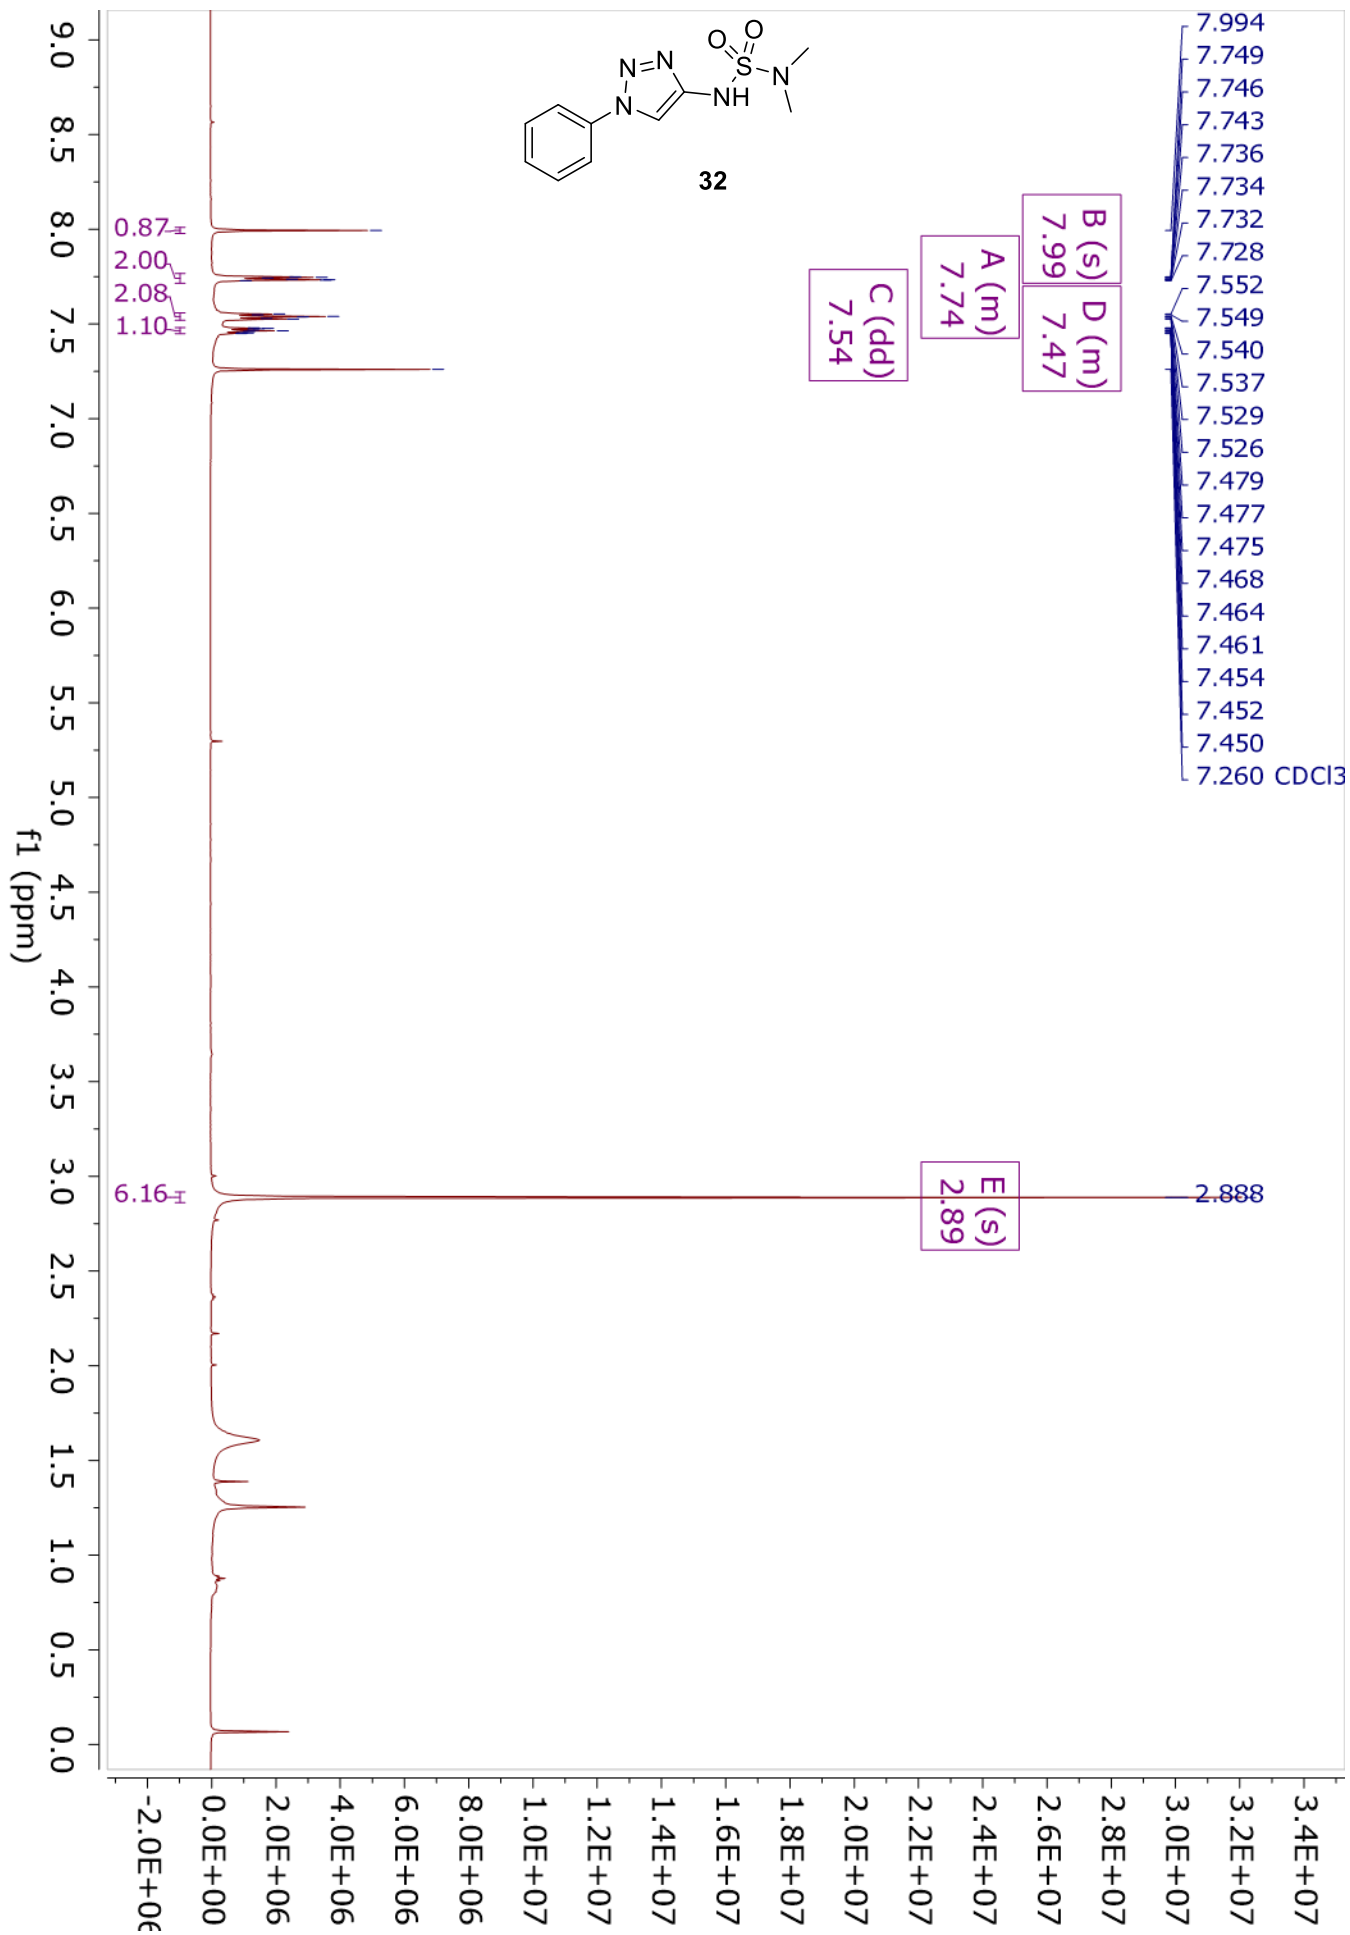

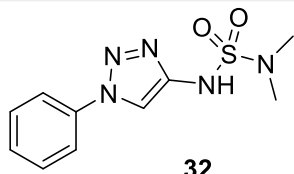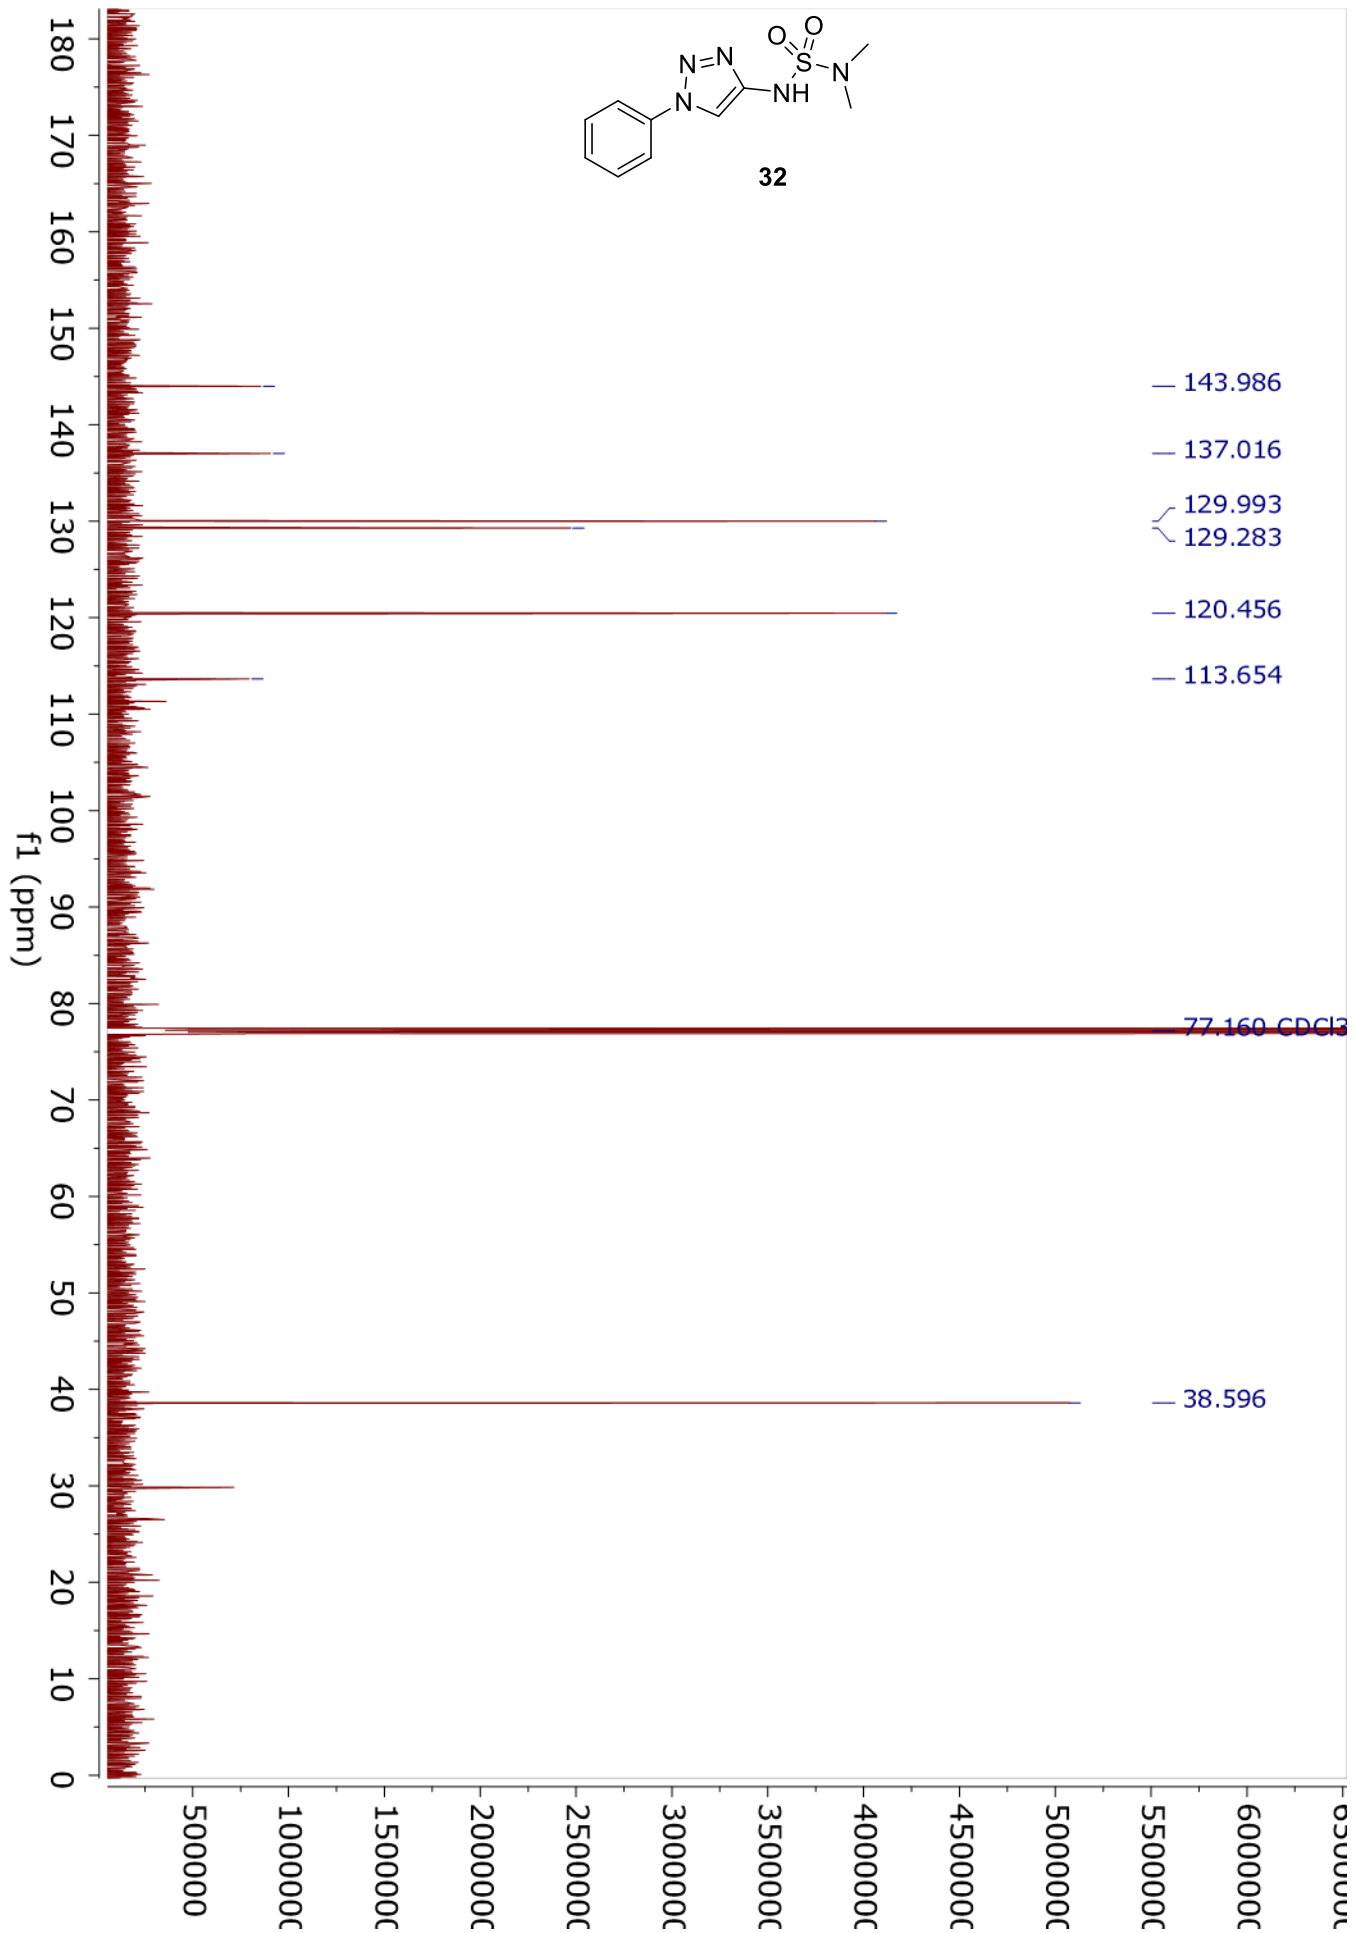



Sample name: **BL-0393 (Cpd 9)**  
 Assay name: **pH-metric pKa**  
 Assay ID: **20D-20005**  
 Filename:

Experiment start time: **4/20/2020 2:05:41 PM**  
 Analyst:  
 Instrument ID: **T317135**

**pH-metric Result**

Acid pKa 1 **4.75 ±0.01 (n=50)**  
 RMSD **0.102**

**Warnings and errors**

Errors **None**  
 Warnings **None**

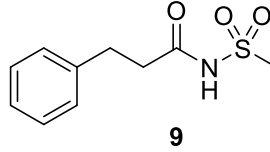

**Graphs**

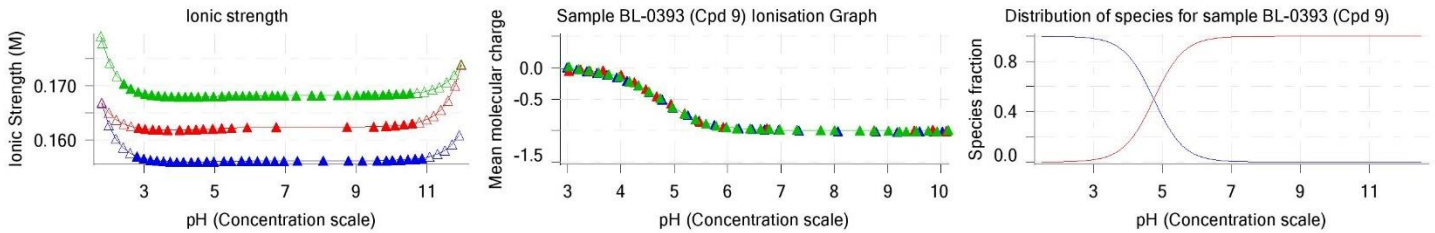

Sample name: **BL-0344 (Cpd 10)**  
 Assay name: **pH-metric pKa**  
 Assay ID: **20D-20006**  
 Filename:

Experiment start time: **4/20/2020 3:02:57 PM**  
 Analyst:  
 Instrument ID: **T317135**

**pH-metric Result**

Acid pKa 1 5.79 ±0.01 (n=49)  
 RMSD 0.168

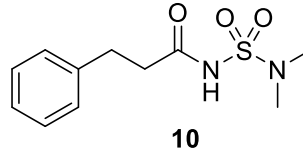

**Warnings and errors**

Errors None  
 Warnings None

**Graphs**

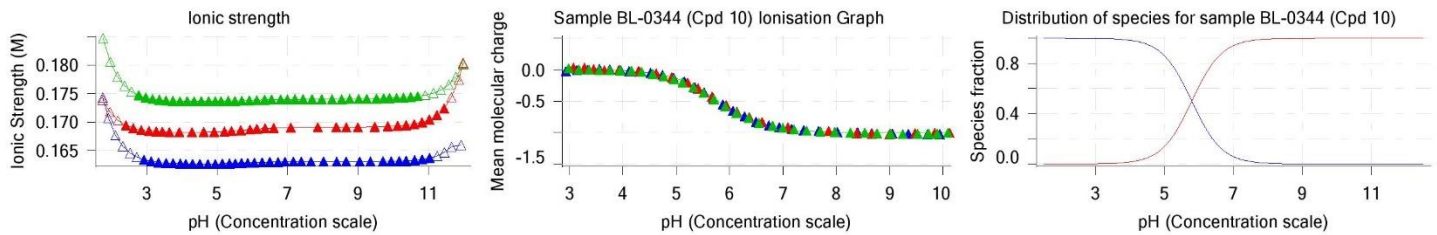

Sample name: **BL-0664 (Cpd 11)**  
 Assay name: **pH-metric pKa**  
 Assay ID: **19B-19008**  
 Filename:

Experiment start time: **2/19/2019 1:57:00 PM**  
 Analyst:  
 Instrument ID: **T317135**

**pH-metric Result**

Acid pKa 1 **4.49 ±0.04 (n=49)**  
 RMSD **0.605**

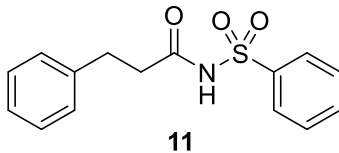

**Warnings and errors**

Errors **None**  
 Warnings **None**

**Graphs**

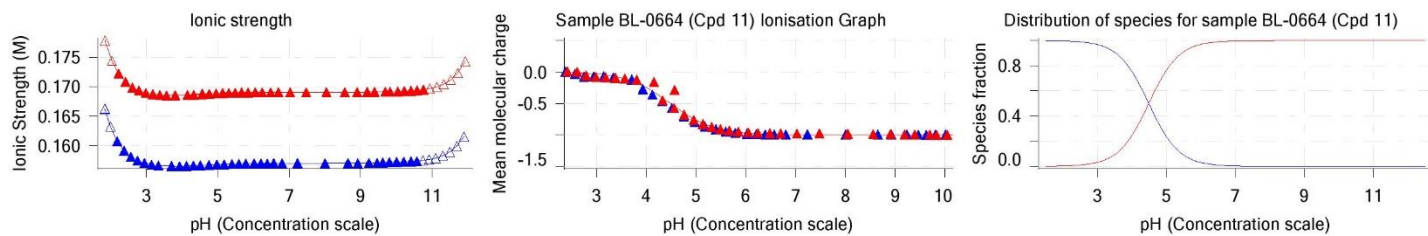

Sample name: **BL-0822 (Cpd 12)**  
 Assay name: **pH-metric pKa**  
 Assay ID: **20C-23007**  
 Filename:

Experiment start time: **3/23/2020 1:19:23 PM**  
 Analyst:  
 Instrument ID: **T317135**

**pH-metric Result**

Acid pKa 1 **4.91 ±0.01 (n=50)**  
 RMSD **0.174**

**Warnings and errors**

Errors **None**  
 Warnings **None**

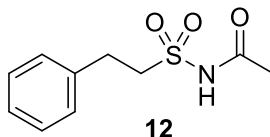

**Graphs**

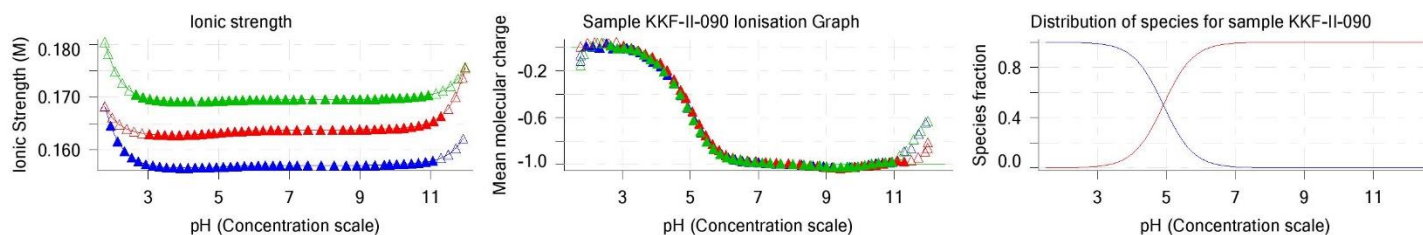

Sample name: **BL-0789 (Cpd 13)**  
 Assay name: **pH-metric pKa**  
 Assay ID: **20A-31002**  
 Filename:

Experiment start time: **1/31/2020 8:34:52 AM**  
 Analyst:  
 Instrument ID: **T317135**

### pH-metric Result

Acid pKa 1 **10.45 ±0.01 (n=50)**  
 RMSD **0.252**

### Warnings and errors

Errors **None**  
 Warnings **None**

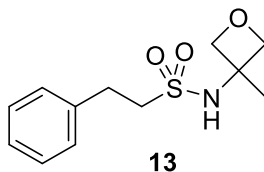

### Graphs

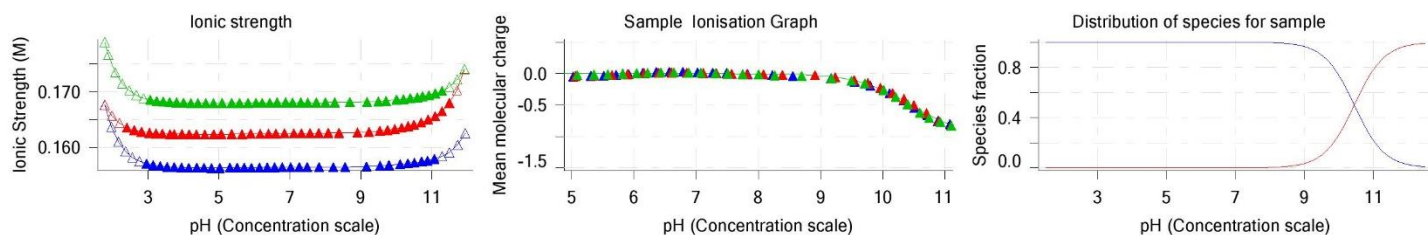

Sample name: **BL-0650 (Cpd 15)**  
 Assay name: **pH-metric pKa**  
 Assay ID: **18I-12002**  
 Filename:

Experiment start time: **9/12/2018 2:55:21 PM**  
 Analyst:  
 Instrument ID: **T317135**

**pH-metric Result**

Acid pKa 1 **10.05 ±0.01 (n=49)**  
 RMSD **0.100**

**Warnings and errors**

Errors **None**  
 Warnings **None**

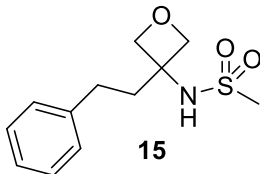

**Graphs**

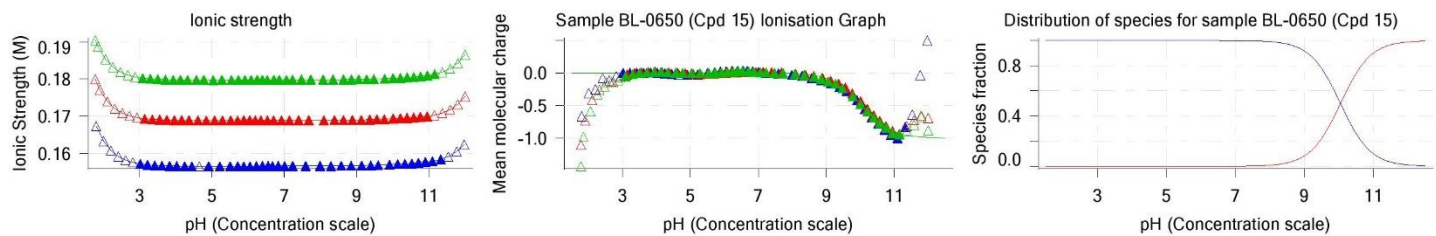

Sample name: **BL-0658 (Cpd 16)**  
 Assay name: **pH-metric psKa**  
 Assay ID: **19B-19012**  
 Filename:

Experiment start time: **2/19/2019 6:35:49 PM**  
 Analyst:  
 Instrument ID: **T317135**

### Yasuda-Shedlovsky result

| Extrapolation type | pKa 0% | SD    | Intercept | Slope   | R <sup>2</sup> | Ionic strength | Temperature |
|--------------------|--------|-------|-----------|---------|----------------|----------------|-------------|
| Yasuda-Shedlovsky  | 10.29  | ±0.12 | 11.29     | 58.6190 | 0.7880         | 0.170 M        | 25.0°C      |

### Warnings and errors

Errors None  
 Warnings None

### Graphs

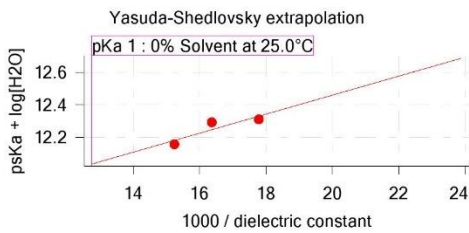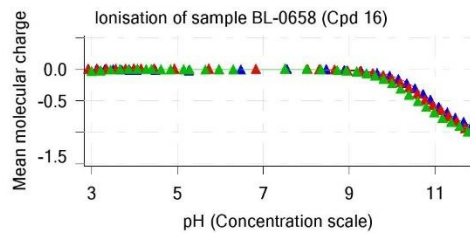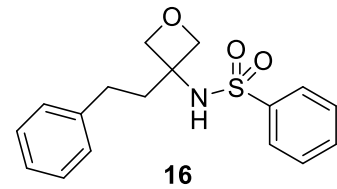

### pH-metric Result

RMSD 0.440

### Warnings and errors

Errors None  
 Warnings None

### Graphs

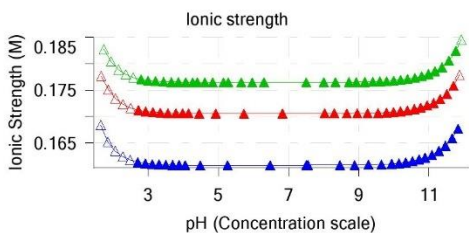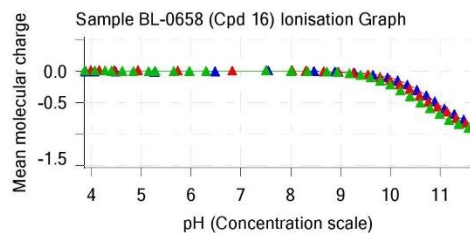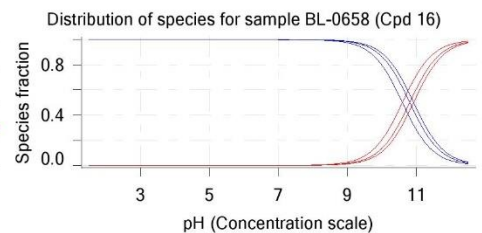

Sample name: **BL-0663 (Cpd 17)**  
 Assay name: **pH-metric pKa**  
 Assay ID: **19C-06002**  
 Filename:

Experiment start time: **3/6/2019 12:17:05 PM**  
 Analyst:  
 Instrument ID: **T317135**

**pH-metric Result**

Acid pKa 1 11.02 ±0.01 (n=50)  
 RMSD 0.567

**Warnings and errors**

Errors None  
 Warnings None

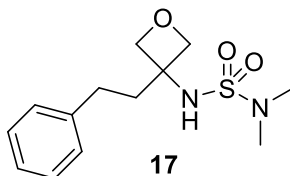

**Graphs**

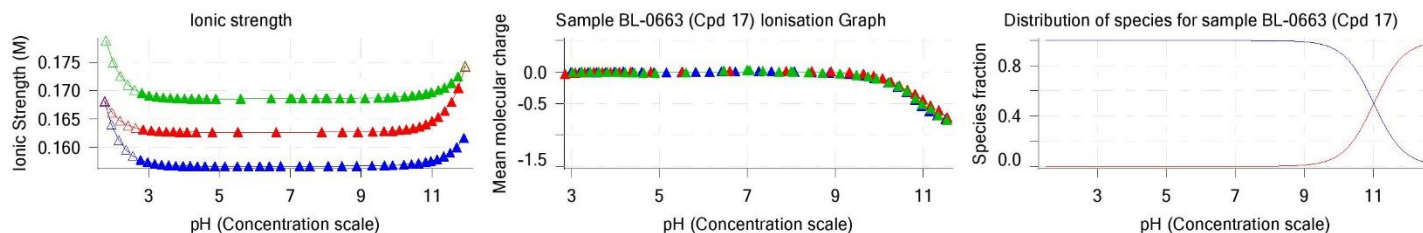



Multiset name: **BL-0667 (Cpd 18)**  
 Filename:

Instrument ID: **T317135**

**pH-metric Result**

Acid pKa 1 10.45 ±0.02 (n=50)  
 RMSD 0.126

**Warnings and errors**

Errors None  
 Warnings None

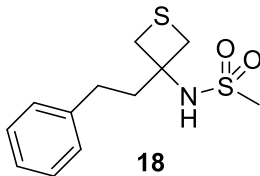

**Graphs**

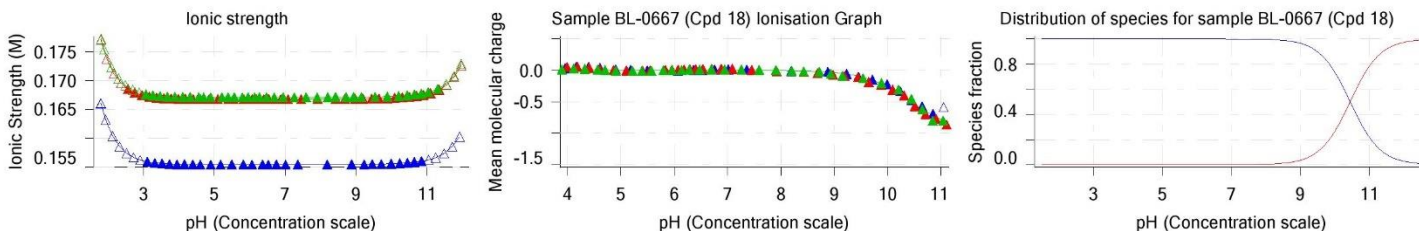

**Multiset assays**

**Assay 1 of 2**

Sample name pH-metric pKa  
 Assay name pH-metric pKa  
 Assay ID 19B-04002  
 Instrument ID T317135  
 Imported from  
 Imported on 10/5/2019 3:29:09 PM  
 Analyst name  
 Experiment start time 2/4/2019 6:02:03 PM

**Assay 2 of 2**

Sample name pH-metric pKa  
 Assay name pH-metric pKa  
 Assay ID 19B-07002  
 Instrument ID T317135  
 Imported from  
 Imported on 10/5/2019 3:29:17 PM  
 Analyst name  
 Experiment start time 2/7/2019 10:46:12 AM

Sample name: **BL-0668 (Cpd 20)**  
 Assay name: **pH-metric pKa**  
 Assay ID: **19C-06005**  
 Filename:

Experiment start time: **3/6/2019 4:28:54 PM**  
 Analyst:  
 Instrument ID: **T317135**

**pH-metric Result**

Acid pKa 1 11.93 ±0.05 (n=50)  
 RMSD 0.214

**Warnings and errors**

Errors None  
 Warnings None

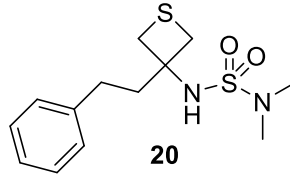

**Graphs**

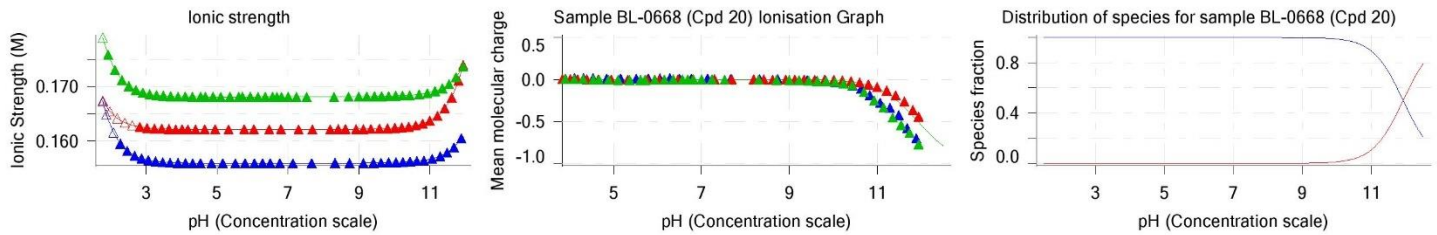

Sample name: **BL-0679 (Cpd 21)**  
 Assay name: **pH-metric pKa**  
 Assay ID: **19I-28008**  
 Filename:

Experiment start time: **9/28/2019 5:22:55 PM**  
 Analyst:  
 Instrument ID: **T317135**

**pH-metric Result**

Acid pKa 1 **9.87 ±0.01 (n=50)**  
 RMSD **0.537**

**Warnings and errors**

Errors **None**  
 Warnings **None**

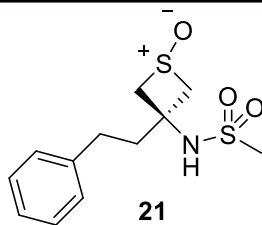

**Graphs**

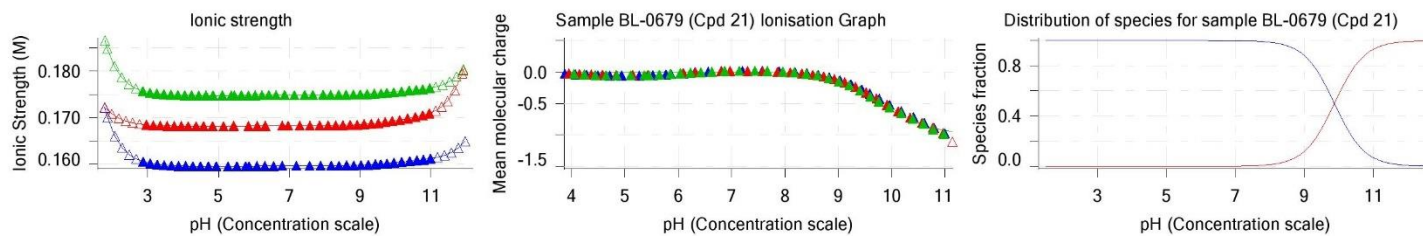

Multiset name: **BL-0688 (Cpd 22)**

Instrument ID: **T317135**

Filename:

### pH-metric Result

Acid pKa 1 9.80 ±0.06 (n=50)  
 RMSD 0.338

### Warnings and errors

Errors None  
 Warnings None

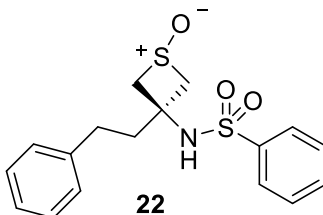

### Graphs

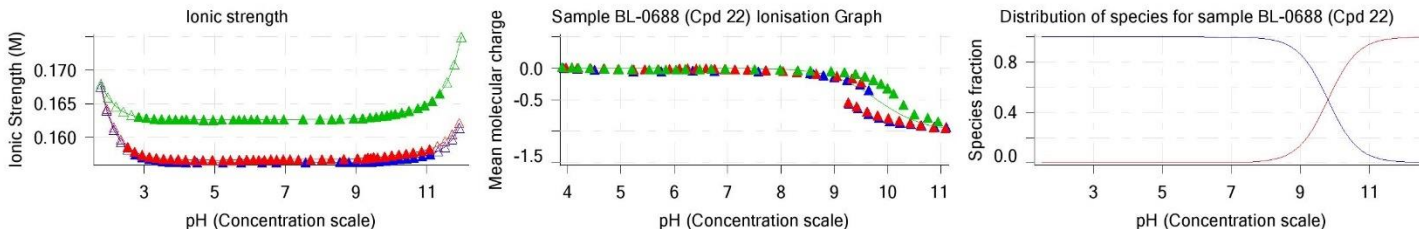

### Multiset assays

#### Assay 1 of 2

Sample name pH-metric pKa  
 Assay name pH-metric pKa  
 Assay ID 19I-11003  
 Instrument ID T317135  
 Imported from  
 Imported on 10/5/2019 3:52:40 PM  
 Analyst name  
 Experiment start time 9/11/2019 9:26:10 AM

#### Assay 2 of 2

Sample name pH-metric pKa  
 Assay name pH-metric pKa  
 Assay ID 19I-11006  
 Instrument ID T317135  
 Imported from  
 Imported on 10/5/2019 3:52:40 PM  
 Analyst name  
 Experiment start time 9/11/2019 12:59:56 PM

Sample name: **BL-0749 (Cpd 23)**  
 Assay name: **pH-metric pKa**  
 Assay ID: **19I-29005**  
 Filename:

Experiment start time: **9/29/2019 1:25:58 PM**  
 Analyst:  
 Instrument ID: **T317135**

**pH-metric Result**

Acid pKa 1 **10.33 ±0.02 (n=50)**  
 RMSD **0.484**

**Warnings and errors**

Errors **None**  
 Warnings **None**

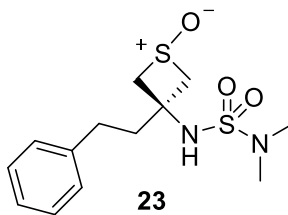

**Graphs**

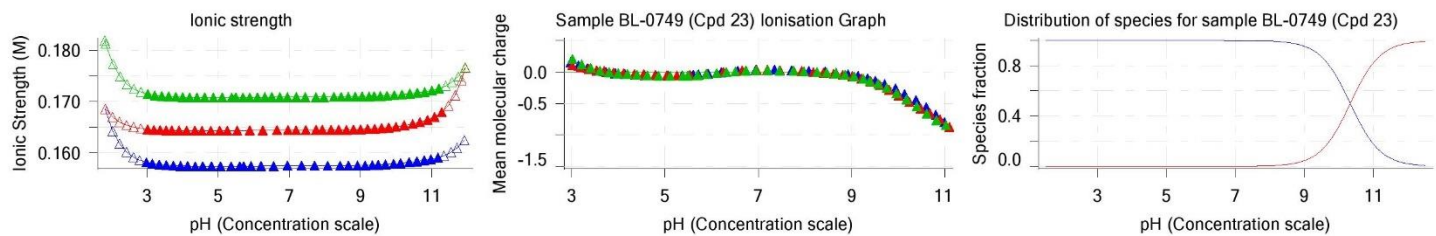

Sample name: **BL-0672 (Cpd 24)**  
 Assay name: **pH-metric pKa**  
 Assay ID: **19B-05004**  
 Filename:

Experiment start time: **2/5/2019 11:59:18 AM**  
 Analyst:  
 Instrument ID: **T317135**

**pH-metric Result**

Acid pKa 1 9.44 ±0.02 (n=50)  
 RMSD 0.258

**Warnings and errors**

Errors None  
 Warnings None

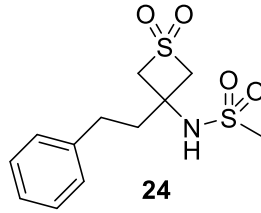

**Graphs**

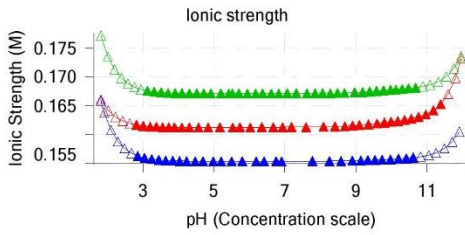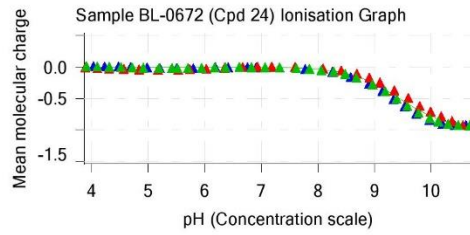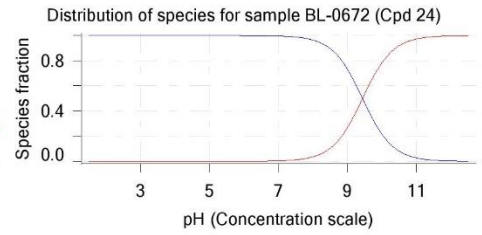

Multiset name: **BL-0750 (Cpd 25)**

 Instrument ID: **T317135**

Filename:

**Yasuda-Shedlovsky result**

| Extrapolation type | pKa 0% | SD    | Intercept | Slope     | R <sup>2</sup> | Ionic strength | Temperature |
|--------------------|--------|-------|-----------|-----------|----------------|----------------|-------------|
| Yasuda-Shedlovsky  | 10.22  | ±0.15 | 14.12     | -169.1780 | 0.9673         | 0.158 M        | 25.0°C      |

**Warnings and errors**

Errors None

Warnings None

**Graphs**
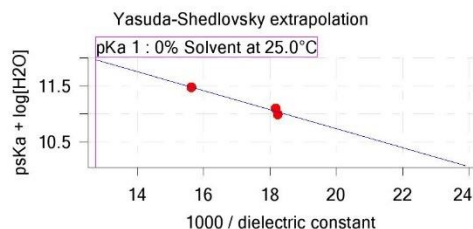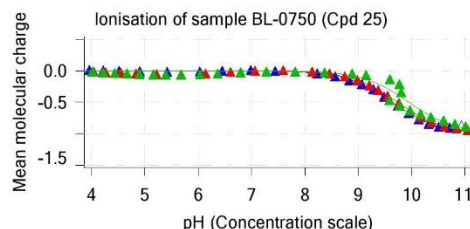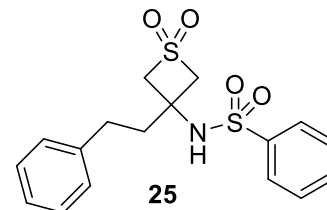
**pH-metric Result**

RMSD 0.508

**Warnings and errors**

Errors None

Warnings None

**Graphs**
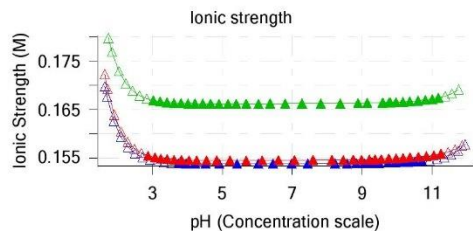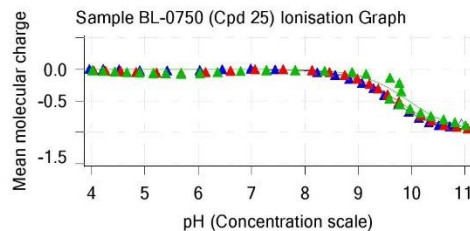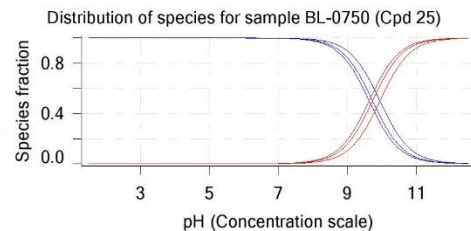
**Multiset assays**
**Assay 1 of 2**

|                       |                      |
|-----------------------|----------------------|
| Sample name           | 490 pKa              |
| Assay name            | pH-metric psKa       |
| Assay ID              | 19I-12005            |
| Instrument ID         | T317135              |
| Imported from         |                      |
| Imported on           | 10/5/2019 3:54:52 PM |
| Analyst name          |                      |
| Experiment start time | 9/12/2019 2:14:23 PM |

**Assay 2 of 2**

|               |                      |
|---------------|----------------------|
| Sample name   | KKF-I-494 pska       |
| Assay name    | pH-metric psKa       |
| Assay ID      | 19I-28005            |
| Instrument ID | T317135              |
| Imported from |                      |
| Imported on   | 10/5/2019 3:54:52 PM |
| Analyst name  |                      |

Sample name: **BL-0689 (Cpd 26)**  
 Assay name: **pH-metric pKa**  
 Assay ID: **19J-05005**  
 Filename:

Experiment start time: **10/5/2019 12:16:57 PM**  
 Analyst:  
 Instrument ID: **T317135**

**pH-metric Result**

Acid pKa 1 9.58 ±0.01 (n=50)  
 RMSD 0.202

**Warnings and errors**

Errors None  
 Warnings None

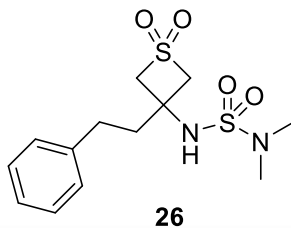

**Graphs**

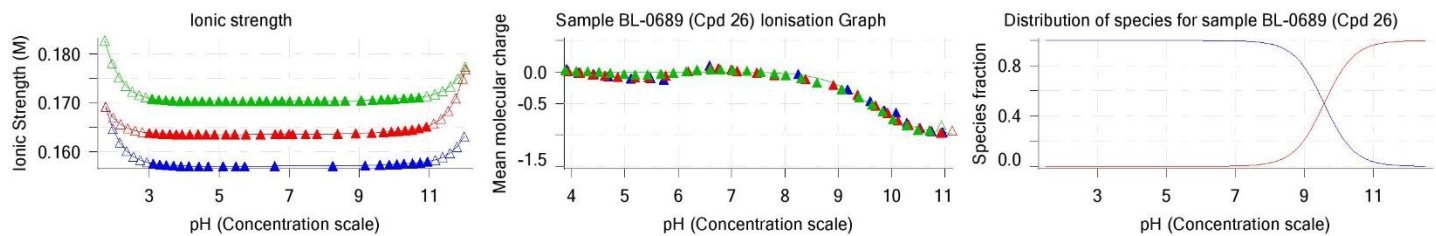



Sample name: **BL-0792 (Cpd 27)**  
 Assay name: **pH-metric pKa**  
 Assay ID: **20A-21002**  
 Filename:

Experiment start time: **1/21/2020 4:32:00 PM**  
 Analyst:  
 Instrument ID: **T317135**

**pH-metric Result**

Acid pKa 1 5.22 ±0.01 (n=50)  
 RMSD 0.281

**Warnings and errors**

Errors None  
 Warnings None

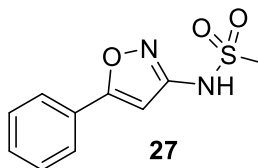

**Graphs**

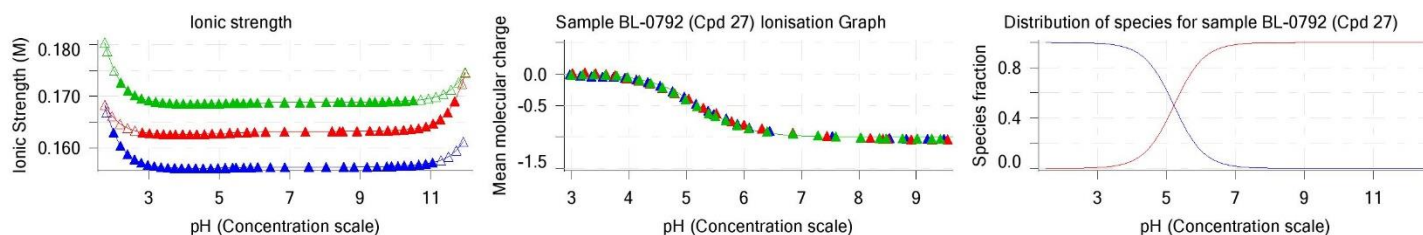

Multiset name: **BL-0793 (Cpd 28)**  
 Filename:

Instrument ID: **T317135**

### pH-metric Result

Acid pKa 1 6.62 ±0.02 (n=50)  
 RMSD 0.157

### Warnings and errors

Errors None  
 Warnings None

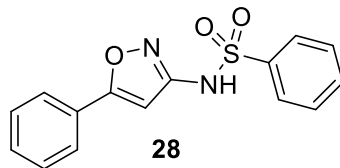

### Graphs

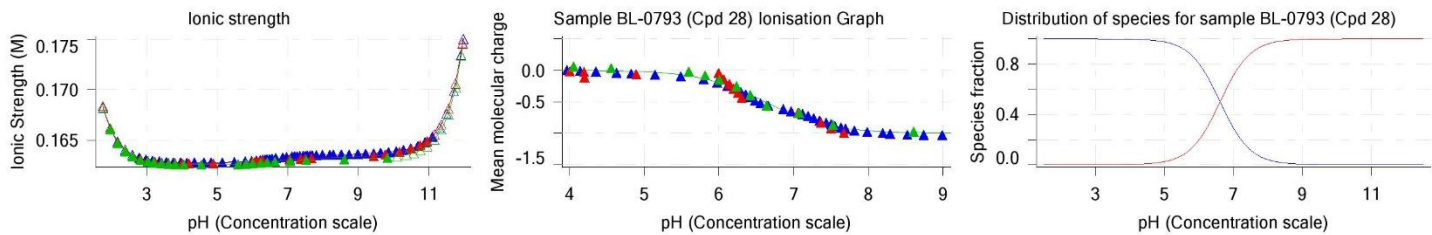

### Multiset assays

#### Assay 1 of 3

Sample name KKF-II-028  
 Assay name pH-metric pKa  
 Assay ID 20A-28003  
 Instrument ID T317135  
 Imported from  
 Imported on 1/29/2020 6:18:41 PM  
 Analyst name  
 Experiment start time 1/28/2020 10:08:17 AM

#### Assay 2 of 3

Sample name KKF-II-028 pka  
 Assay name pH-metric pKa  
 Assay ID 20A-29002  
 Instrument ID T317135  
 Imported from  
 Imported on 1/29/2020 6:18:44 PM  
 Analyst name  
 Experiment start time 1/29/2020 10:41:37 AM

#### Assay 3 of 3

Sample name KKF-II-028 pka  
 Assay name pH-metric pKa  
 Assay ID 20A-29005  
 Instrument ID T317135  
 Imported from  
 Imported on 1/29/2020 6:18:45 PM  
 Analyst name  
 Experiment start time 1/29/2020 4:45:17 PM

Multiset name: **BL-0797 (Cpd 29)**

Instrument ID: **T317135**

Filename:

### pH-metric Result

Acid pKa 1 5.62 ±0.02 (n=50)  
RMSD 0.148

### Warnings and errors

Errors None  
Warnings None

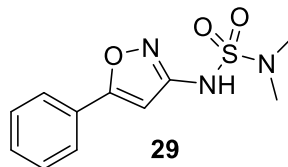

### Graphs

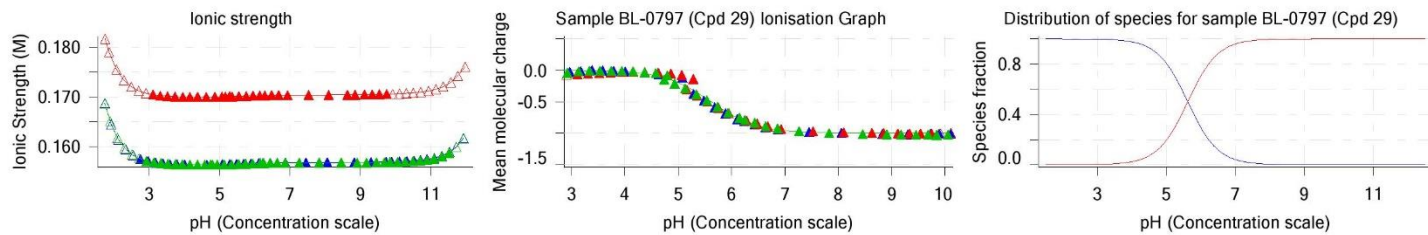

### Multiset assays

#### Assay 1 of 2

Sample name KKF-II-031 pKa  
Assay name pH-metric pKa  
Assay ID 20A-27003  
Instrument ID T317135  
Imported from  
Imported on 1/27/2020 5:16:57 PM  
Analyst name  
Experiment start time 1/27/2020 3:59:26 PM

#### Assay 2 of 2

Sample name KKF-II-031 pKa  
Assay name pH-metric pKa  
Assay ID 20A-27002  
Instrument ID T317135  
Imported from  
Imported on 1/27/2020 5:17:02 PM  
Analyst name  
Experiment start time 1/27/2020 3:16:05 PM

Sample name: **BL-0771 (Cpd 30)**  
 Assay name: **pH-metric pKa**  
 Assay ID: **19J-25002**  
 Filename:

Experiment start time: **10/25/2019 2:43:03 PM**  
 Analyst:  
 Instrument ID: **T317135**

**pH-metric Result**

Acid pKa 1 6.34 ±0.01 (n=50)  
 RMSD 0.104

**Warnings and errors**

Errors None  
 Warnings None

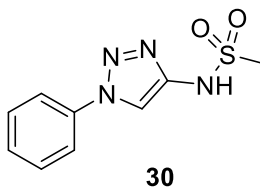

**Graphs**

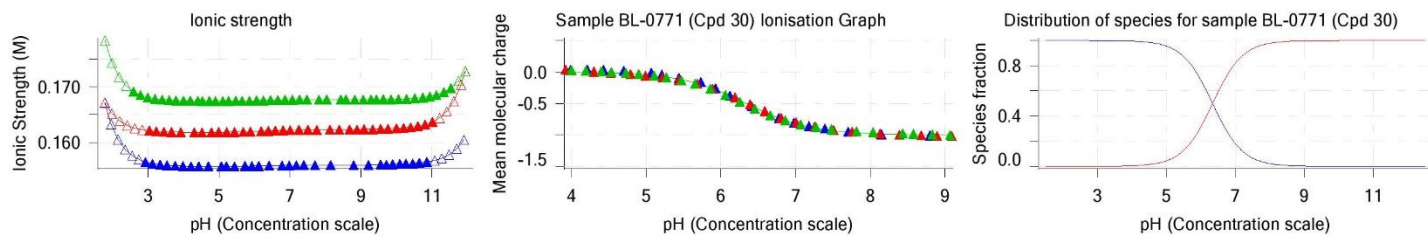

Multiset name: **BL-0772 (Cpd 31)**

Instrument ID: **T317135**

Filename:

### pH-metric Result

Acid pKa 1 5.93 ±0.05 (n=50)  
RMSD 0.136

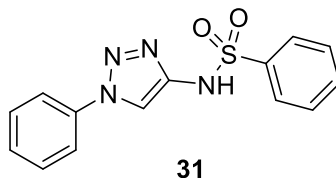

### Warnings and errors

Errors None  
Warnings None

### Graphs

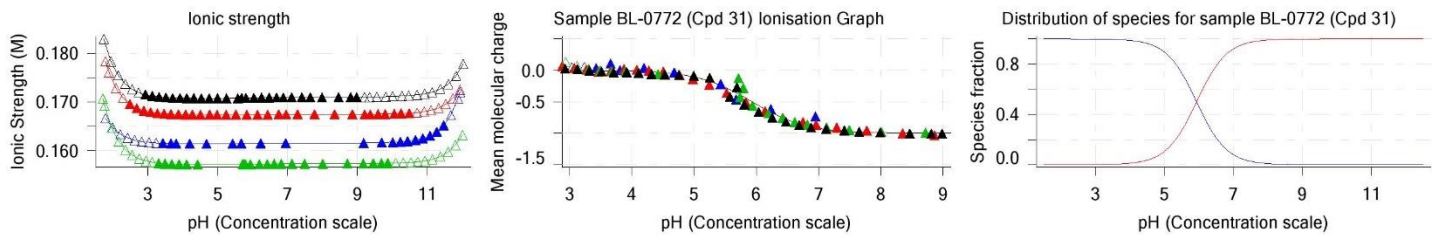

### Multiset assays

#### Assay 1 of 2

Sample name KKF-I-535  
Assay name pH-metric pKa  
Assay ID 19J-26003  
Instrument ID T317135  
Imported from  
Imported on 10/26/2019 12:47:21 PM  
Analyst name  
Experiment start time 10/26/2019 11:57:30 AM

#### Assay 2 of 2

Sample name KKF-I-535  
Assay name pH-metric pKa  
Assay ID 19J-19005  
Instrument ID T317135  
Imported from  
Imported on 10/26/2019 12:47:33 PM  
Analyst name  
Experiment start time 10/19/2019 2:00:20 PM

Sample name: **BL-0773 (Cpd 32)**  
 Assay name: **pH-metric pKa**  
 Assay ID: **19J-20005**  
 Filename:

Experiment start time: **10/20/2019 12:36:44 PM**  
 Analyst:  
 Instrument ID: **T317135**

**pH-metric Result**

Acid pKa 1 6.42 ±0.01 (n=50)  
 RMSD 0.174

**Warnings and errors**

Errors None  
 Warnings None

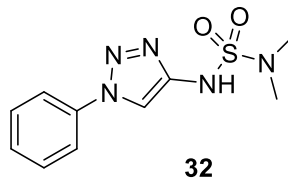

**Graphs**

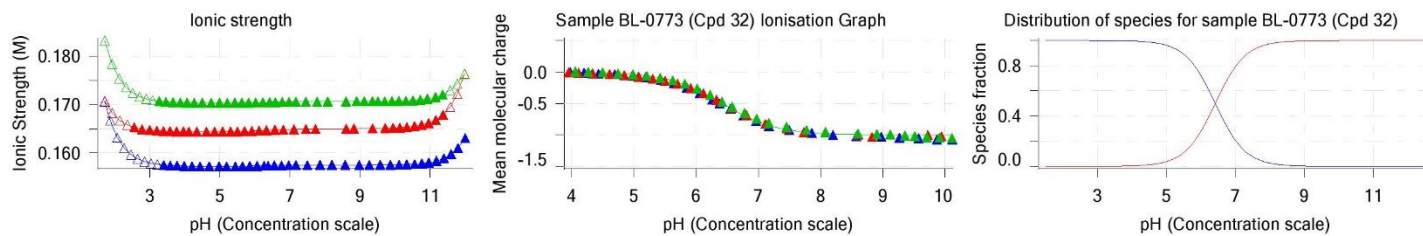

Sample name: **BL-0393 (Cpd 9)**  
 Assay name: **pH-metric medium logP**  
 Assay ID: **20D-21010**  
 Filename:

Experiment start time: **4/21/2020 3:53:14 PM**  
 Analyst:  
 Instrument ID: **T317135**

**pH-metric Result**

logP (neutral XH) 1.10 ±0.01 (n=50)  
 logP (X-) -0.69 ±0.08 (n=50)  
 RMSD 0.199

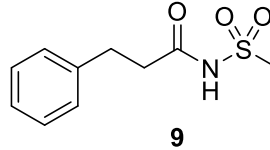

**Warnings and errors**

Errors None  
 Warnings None

**Sample logD values**

| pH     | BL-0393 (Cpd 9) logD | Comment    |
|--------|----------------------|------------|
| 1.000  | 1.10                 |            |
| 1.200  | 1.10                 | Stomach pH |
| 2.000  | 1.10                 |            |
| 3.000  | 1.10                 |            |
| 4.000  | 1.03                 |            |
| 5.000  | 0.67                 |            |
| 6.000  | -0.06                |            |
| 6.500  | -0.38                |            |
| 7.000  | -0.56                |            |
| 7.400  | -0.64                | Blood pH   |
| 8.000  | -0.68                |            |
| 9.000  | -0.69                |            |
| 10.000 | -0.69                |            |
| 11.000 | -0.69                |            |
| 12.000 | -0.69                |            |

**Graphs**

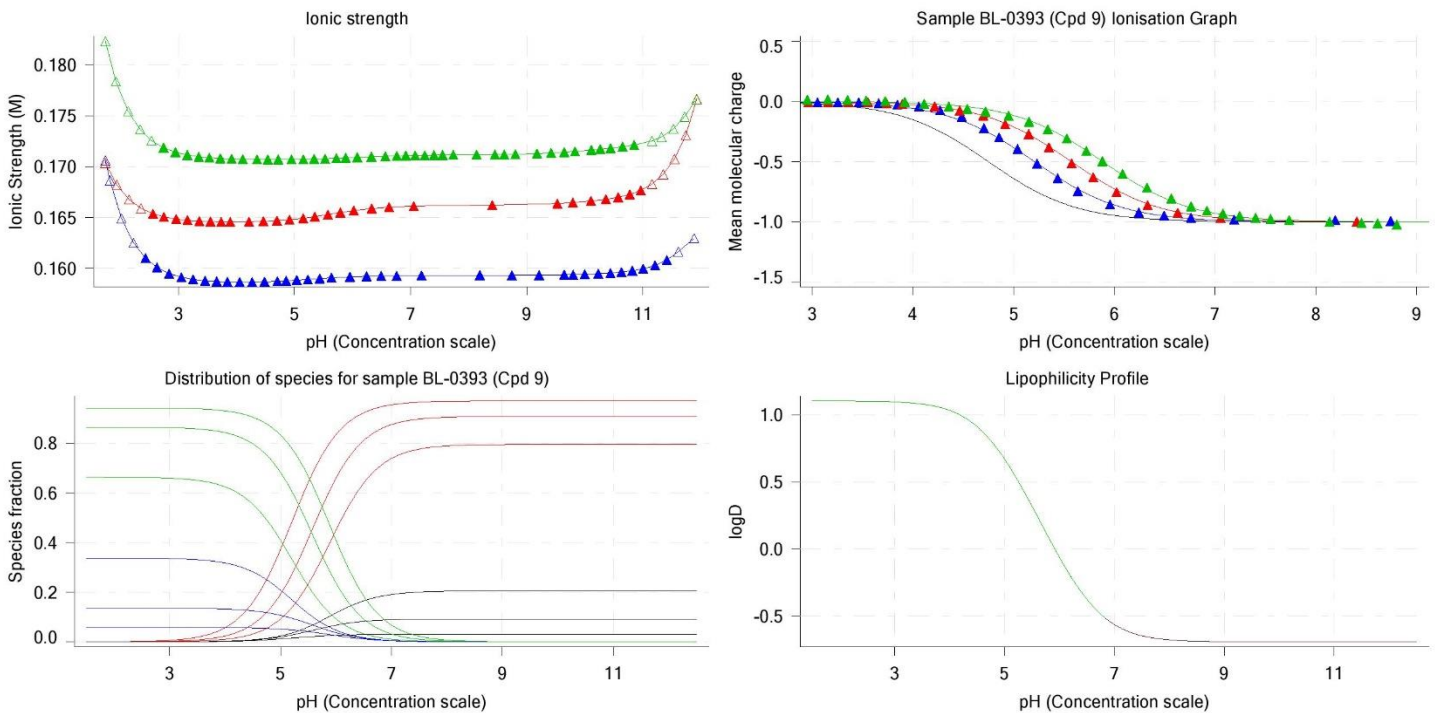

**pH-metric Result**

logP (neutral XH) -1.03 ±0.03 (n=50)  
 logP (X-) -8.96 ±0.92 (n=50)  
 RMSD 0.112

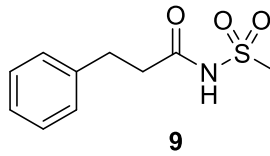

**Warnings and errors**

Errors None  
 Warnings None

**Sample logD values**

| pH     | BL-0393 (Cpd 9) logD | Comment    |
|--------|----------------------|------------|
| 1.000  | -1.03                |            |
| 1.200  | -1.03                |            |
| 2.000  | -1.03                | Stomach pH |
| 3.000  | -1.04                |            |
| 4.000  | -1.10                |            |
| 5.000  | -1.47                |            |
| 6.000  | -2.30                |            |
| 6.500  | -2.79                |            |
| 7.000  | -3.28                |            |
| 7.400  | -3.68                | Blood pH   |
| 8.000  | -4.28                |            |
| 9.000  | -5.28                |            |
| 10.000 | -6.28                |            |
| 11.000 | -7.27                |            |
| 12.000 | -8.20                |            |

**Graphs**

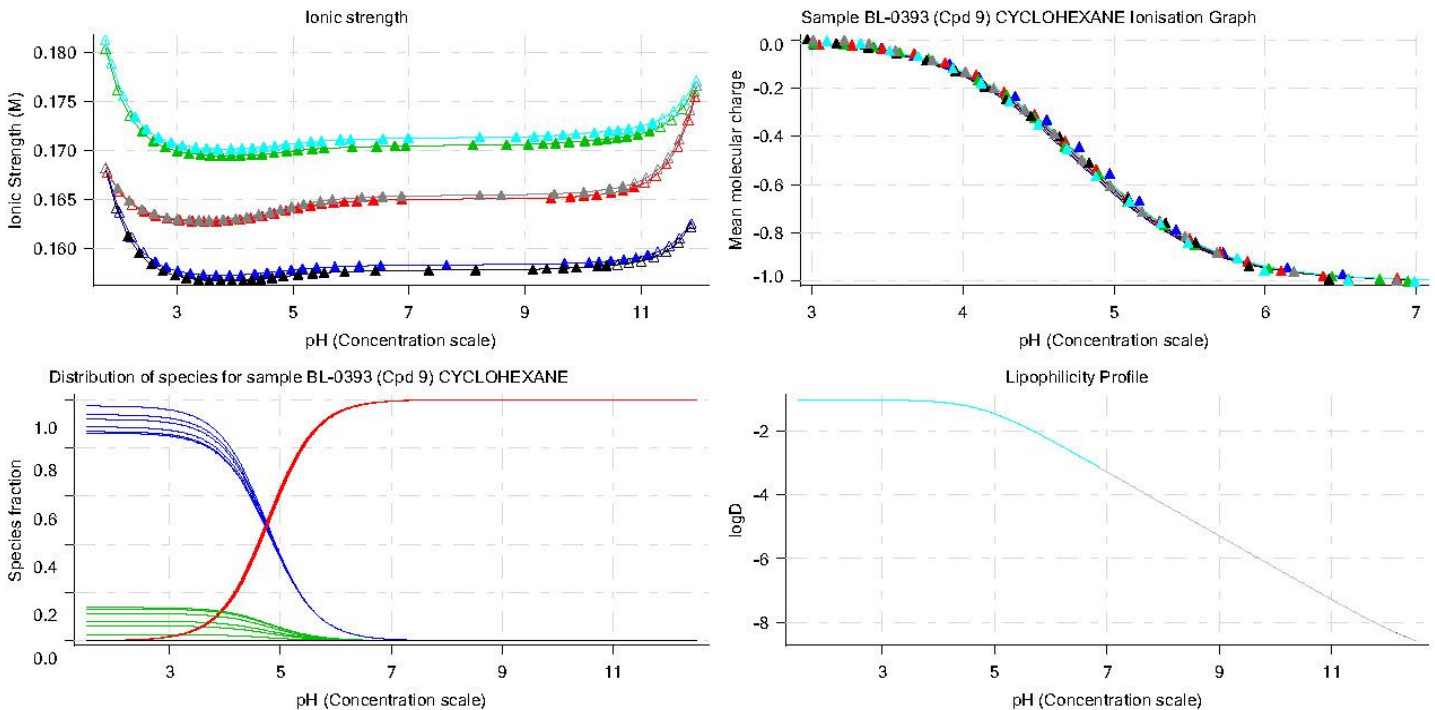



**pH-metric Result**

logP (neutral XH) -0.53 ±0.04 (n=50)  
 logP (X-) -7.93 ±0.72 (n=50)  
 RMSD 0.319

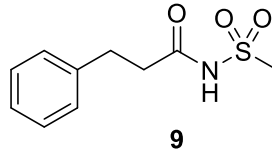

**Warnings and errors**

Errors None  
 Warnings None

**Sample logD values**

| pH     | BL-0393 (Cpd 9) logD | Comment    |
|--------|----------------------|------------|
| 1.000  | -0.53                |            |
| 1.200  | -0.53                | Stomach pH |
| 2.000  | -0.53                |            |
| 3.000  | -0.54                |            |
| 4.000  | -0.60                |            |
| 5.000  | -0.97                |            |
| 6.000  | -1.80                |            |
| 6.500  | -2.29                |            |
| 7.000  | -2.78                |            |
| 7.400  | -3.18                | Blood pH   |
| 8.000  | -3.78                |            |
| 9.000  | -4.78                |            |
| 10.000 | -5.78                |            |
| 11.000 | -6.75                |            |
| 12.000 | -7.55                |            |

**Graphs**

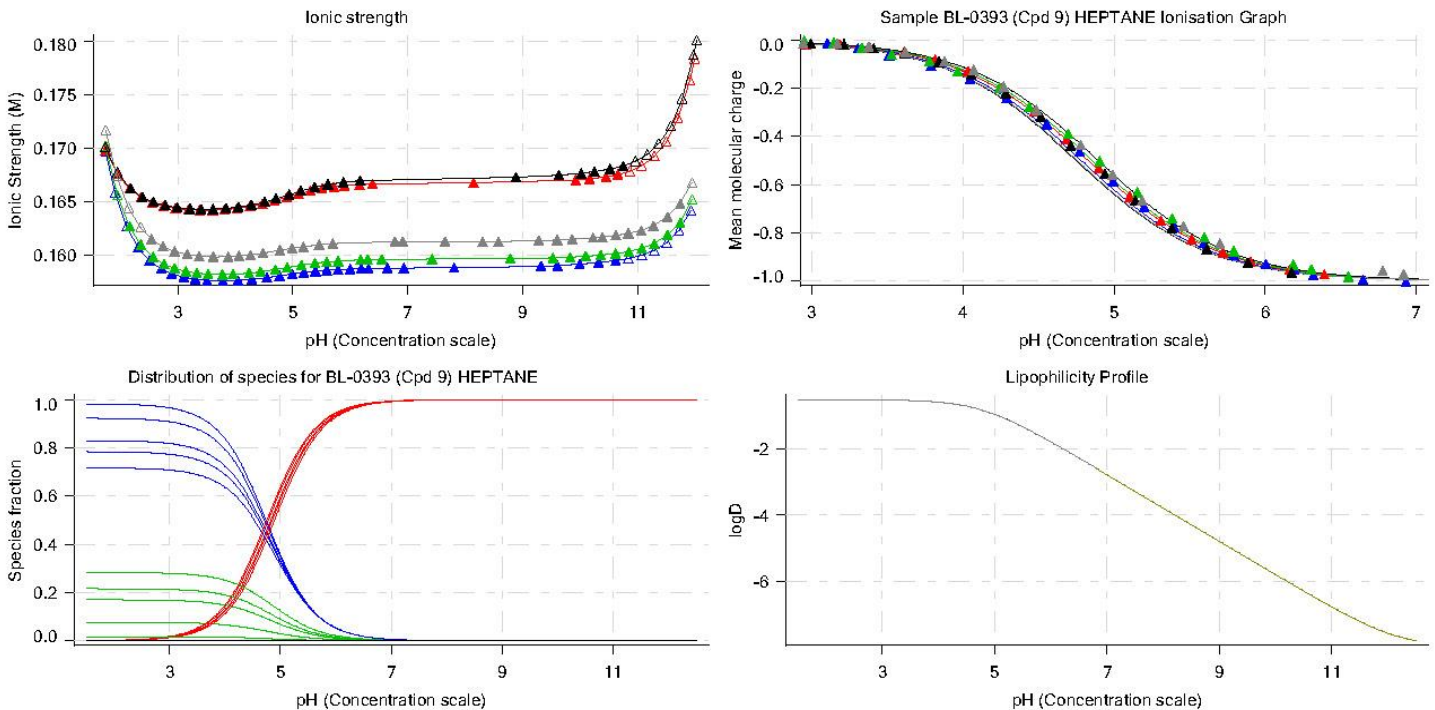

Sample name: **BL-0393 (Cpd 9) TOLUENE**  
 Assay name: **pH-metric medium logP**  
 Assay ID: **20J-27003**  
 Filename:

Experiment start time: **10/27/2020 8:21:42 AM**  
 Analyst:  
 Instrument ID: **T317135**

**pH-metric Result**

logP (neutral XH) 0.21 ±0.02 (n=50)  
 logP (X-) -0.81 ±0.08 (n=50)  
 RMSD 0.249

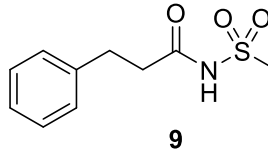

**Warnings and errors**

Errors None  
 Warnings None

**Sample logD values**

| pH     | BL-0393 (Cpd 9) logD | Comment    |
|--------|----------------------|------------|
| 1.000  | 0.21                 |            |
| 1.200  | 0.21                 | Stomach pH |
| 2.000  | 0.21                 |            |
| 3.000  | 0.21                 |            |
| 4.000  | 0.15                 |            |
| 5.000  | -0.16                |            |
| 6.000  | -0.63                |            |
| 6.500  | -0.74                |            |
| 7.000  | -0.79                |            |
| 7.400  | -0.80                | Blood pH   |
| 8.000  | -0.81                |            |
| 9.000  | -0.81                |            |
| 10.000 | -0.81                |            |
| 11.000 | -0.81                |            |
| 12.000 | -0.81                |            |

**Graphs**

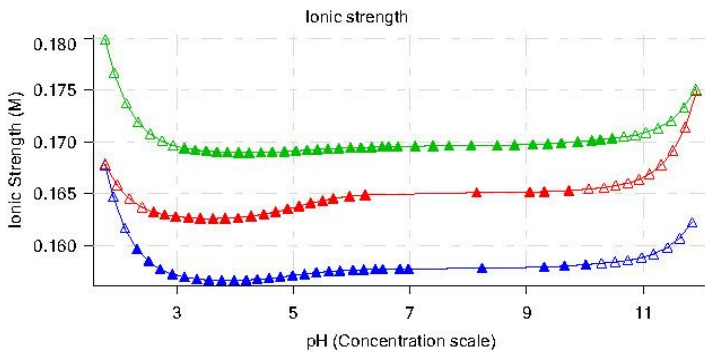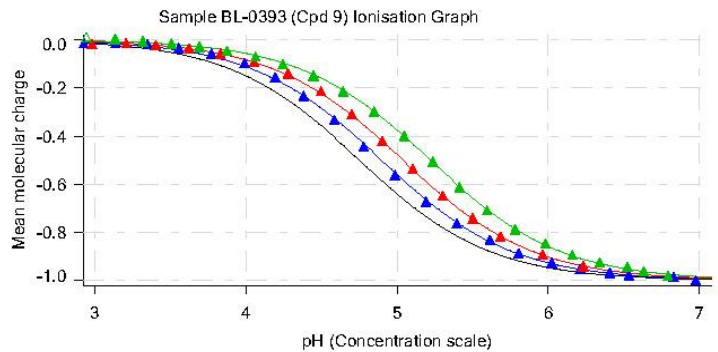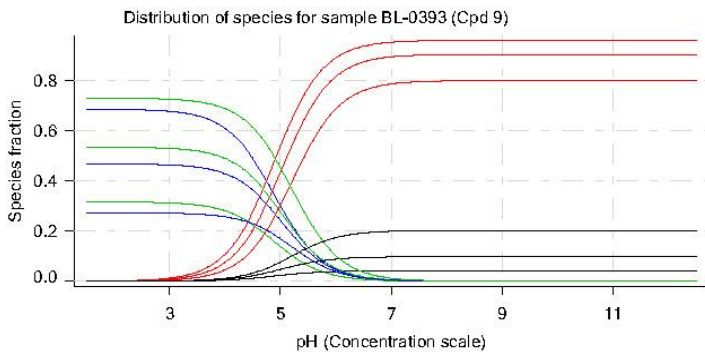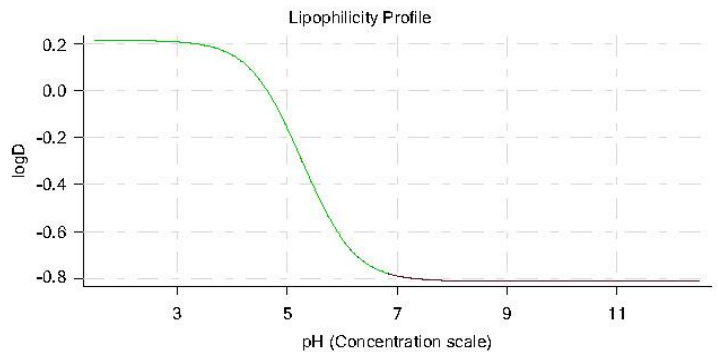

Multiset name: **BL-0344 (Cpd 10)**  
 Quality: **Good**  
 Filename:

Instrument ID: **T317135**

**pH-metric Result**

logP (neutral XH) 1.66 ±0.02 (n=50)  
 logP (X -) -0.66 ±0.09 (n=50)  
 RMSD 0.129

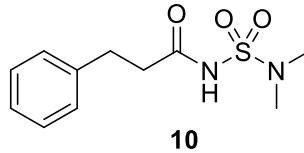

**Warnings and errors**

Errors None  
 Warnings None

**Sample logD values**

| pH     | BL-0344 (Cpd 10) Comment | logD  |
|--------|--------------------------|-------|
| 1.000  |                          | 1.66  |
| 1.200  | Stomach pH               | 1.66  |
| 2.000  |                          | 1.66  |
| 3.000  |                          | 1.66  |
| 4.000  |                          | 1.65  |
| 5.000  |                          | 1.60  |
| 6.000  |                          | 1.25  |
| 6.500  |                          | 0.88  |
| 7.000  |                          | 0.46  |
| 7.400  | Blood pH                 | 0.12  |
| 8.000  |                          | -0.30 |
| 9.000  |                          | -0.61 |
| 10.000 |                          | -0.65 |
| 11.000 |                          | -0.66 |
| 12.000 |                          | -0.66 |

**Graphs**

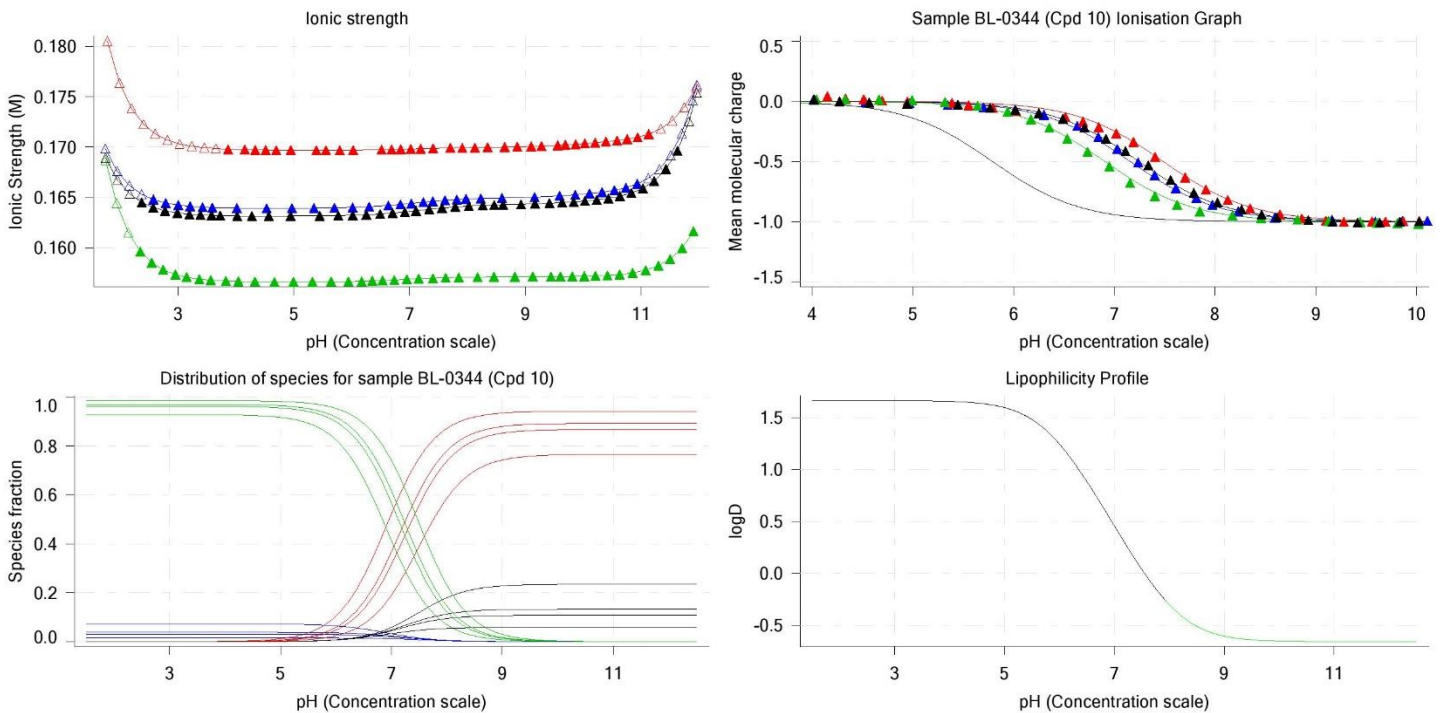

Sample name: **BL-0664 (Cpd 11)**  
 Assay name: **pH-metric high logP**  
 Assay ID: **19B-21007**  
 Filename:

Experiment start time: **2/21/2019 1:38:13 PM**  
 Analyst:  
 Instrument ID: **T317135**

**pH-metric Result**

logP (neutral XH) 2.67 ±0.01 (n=50)  
 logP (X-) -0.61 ±0.11 (n=50)  
 RMSD 0.428

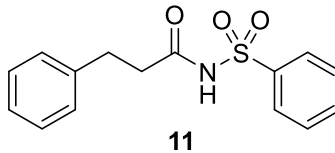

**Warnings and errors**

Errors None  
 Warnings None

**Sample logD values**

| pH     | BL-0664 (Cpd 11) logD | Comment    |
|--------|-----------------------|------------|
| 1.000  | 2.67                  |            |
| 1.200  | 2.67                  | Stomach pH |
| 2.000  | 2.67                  |            |
| 3.000  | 2.66                  |            |
| 4.000  | 2.55                  |            |
| 5.000  | 2.04                  |            |
| 6.000  | 1.15                  |            |
| 6.500  | 0.67                  |            |
| 7.000  | 0.22                  |            |
| 7.400  | -0.09                 | Blood pH   |
| 8.000  | -0.41                 |            |
| 9.000  | -0.59                 |            |
| 10.000 | -0.61                 |            |
| 11.000 | -0.61                 |            |
| 12.000 | -0.61                 |            |

**Graphs**

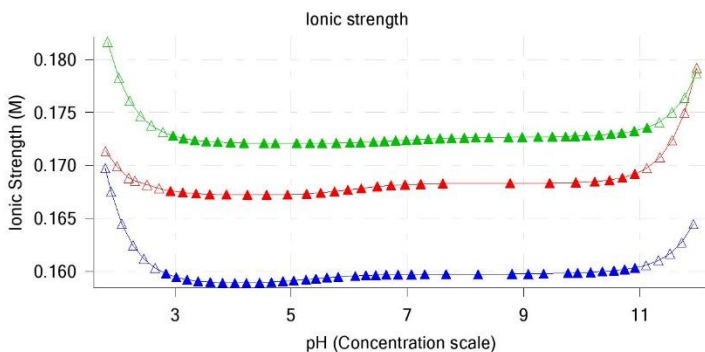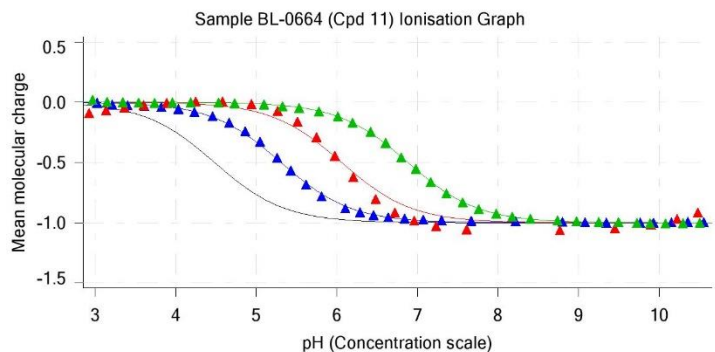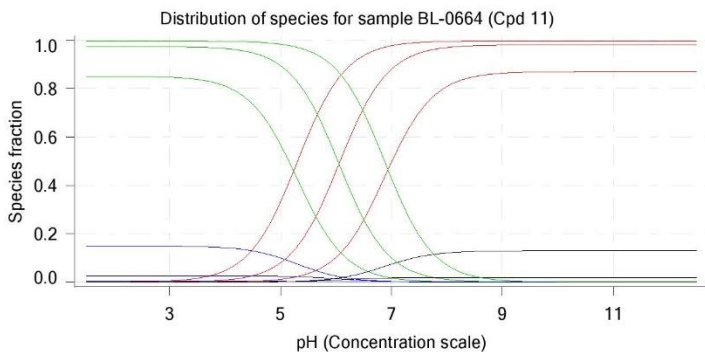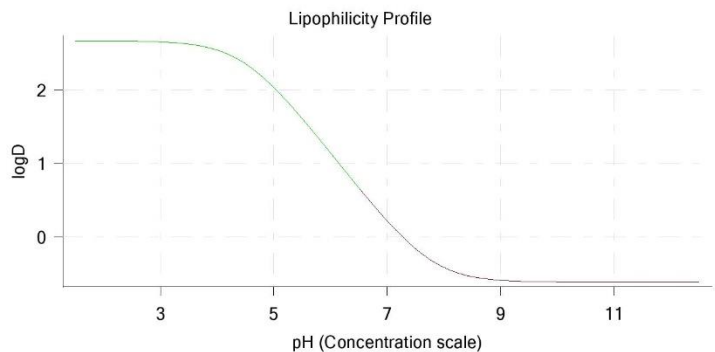

Sample name: **BL-0822 (Cpd 12)**  
 Assay name: **pH-metric medium logP**  
 Assay ID: **20C-24004**  
 Filename:

Experiment start time: **3/24/2020 10:17:38 AM**  
 Analyst:  
 Instrument ID: **T317135**

**pH-metric Result**

logP (neutral XH) 1.04 ±0.01 (n=50)  
 logP (X-) -1.00 ±0.10 (n=50)  
 RMSD 0.139

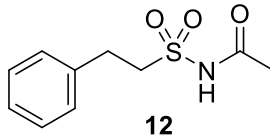

**Warnings and errors**

Errors None  
 Warnings None

**Sample logD values**

| pH     | KKf-II-090  | Comment    |
|--------|-------------|------------|
|        | <b>logD</b> |            |
| 1.000  | 1.04        |            |
| 1.200  | 1.04        | Stomach pH |
| 2.000  | 1.03        |            |
| 3.000  | 1.03        |            |
| 4.000  | 0.99        |            |
| 5.000  | 0.69        |            |
| 6.000  | -0.04       |            |
| 6.500  | -0.43       |            |
| 7.000  | -0.73       |            |
| 7.400  | -0.87       | Blood pH   |
| 8.000  | -0.96       |            |
| 9.000  | -0.99       |            |
| 10.000 | -1.00       |            |
| 11.000 | -1.00       |            |
| 12.000 | -1.00       |            |

**Graphs**

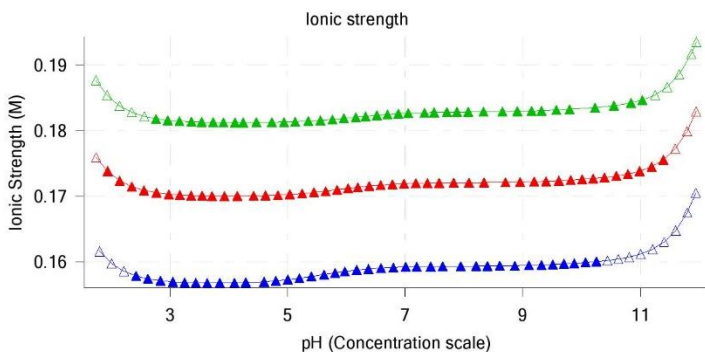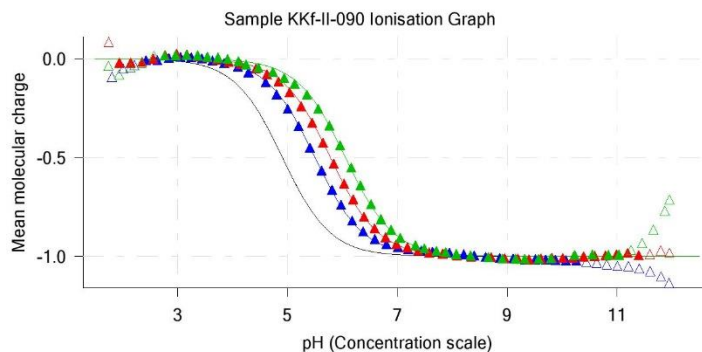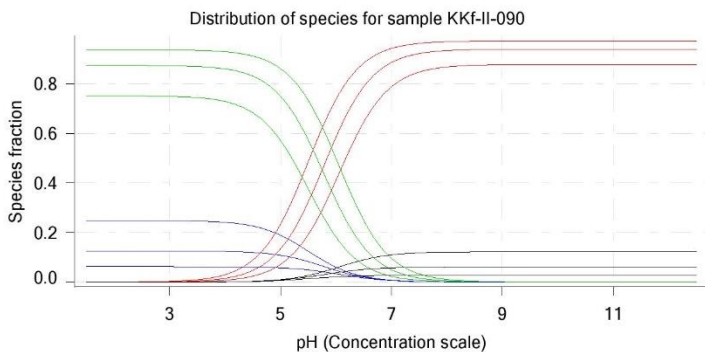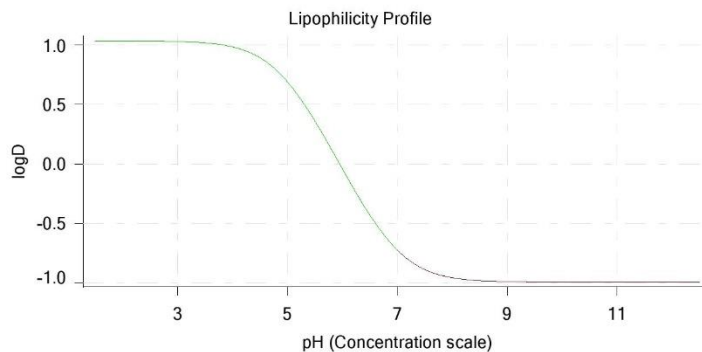

Multiset name: **BL-0822 (Cpd 12) CYCLOHEXANE** Instrument ID: **T317135**  
 Filename:

**pH-metric Result**

logP (neutral XH) -0.59 ±0.04 (n=50)  
 logP (X-) -8.86 ±0.80 (n=50)  
 RMSD 0.217

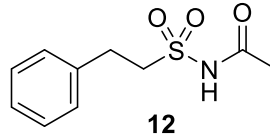

**Assay 20J-28007 -**

**BL-0822 (Cpd 12)** 0.995  
 Carbonate 0.1136 mM  
 Acidity error 0.05528 mM

**Warnings and errors**

Errors None  
 Warnings None

**Sample logD values**

| pH     | BL-0822 (Cpd 12) logD | Comment    |
|--------|-----------------------|------------|
| 1.000  | -0.59                 |            |
| 1.200  | -0.59                 | Stomach pH |
| 2.000  | -0.59                 |            |
| 3.000  | -0.60                 |            |
| 4.000  | -0.64                 |            |
| 5.000  | -0.94                 |            |
| 6.000  | -1.72                 |            |
| 6.500  | -2.19                 |            |
| 7.000  | -2.68                 |            |
| 7.400  | -3.08                 | Blood pH   |
| 8.000  | -3.68                 |            |
| 9.000  | -4.68                 |            |
| 10.000 | -5.68                 |            |
| 11.000 | -6.68                 |            |
| 12.000 | -7.65                 |            |

**Graphs**

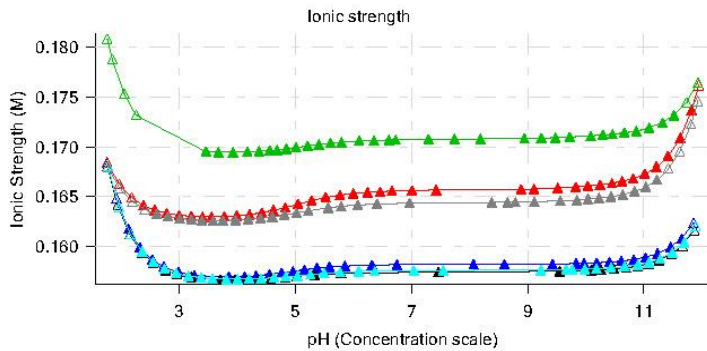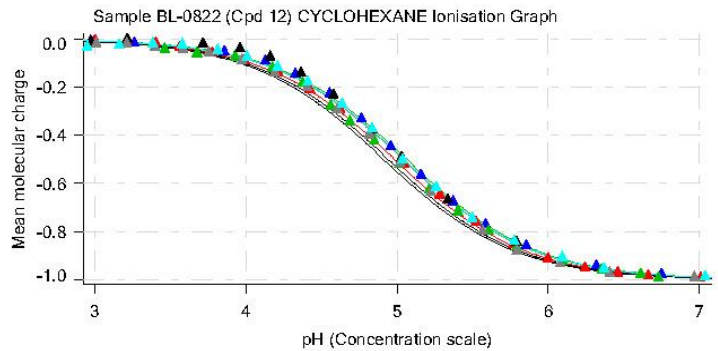

Multiset name: **BL-0822 (Cpd 12) CYCLOHEXANE** Instrument ID: **T317135**  
 Filename:

**Graphs (continued)**

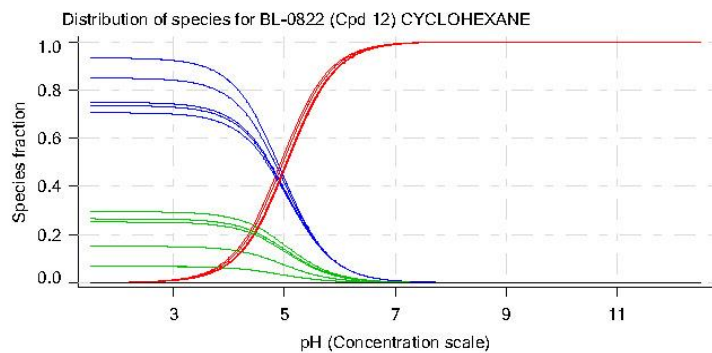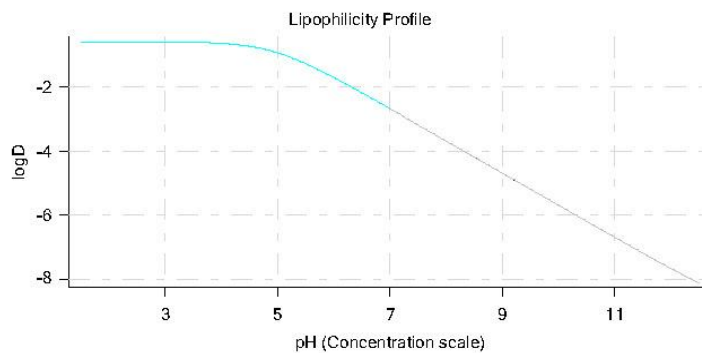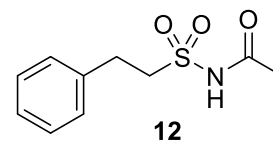

**pH-metric Result**

logP (neutral XH) -0.44 ±0.03 (n=50)  
 logP (X-) -9.50 ±0.52 (n=50)  
 RMSD 0.274

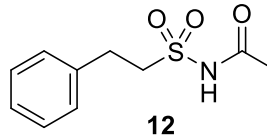

**Warnings and errors**

Errors None  
 Warnings None

**Sample logD values**

| pH     | BL-0822 (Cpd 12) logD | Comment    |
|--------|-----------------------|------------|
| 1.000  | -0.44                 |            |
| 1.200  | -0.44                 |            |
| 2.000  | -0.44                 | Stomach pH |
| 3.000  | -0.44                 |            |
| 4.000  | -0.49                 |            |
| 5.000  | -0.79                 |            |
| 6.000  | -1.56                 |            |
| 6.500  | -2.04                 |            |
| 7.000  | -2.53                 |            |
| 7.400  | -2.93                 | Blood pH   |
| 8.000  | -3.53                 |            |
| 9.000  | -4.53                 |            |
| 10.000 | -5.53                 |            |
| 11.000 | -6.53                 |            |
| 12.000 | -7.52                 |            |

**Graphs**

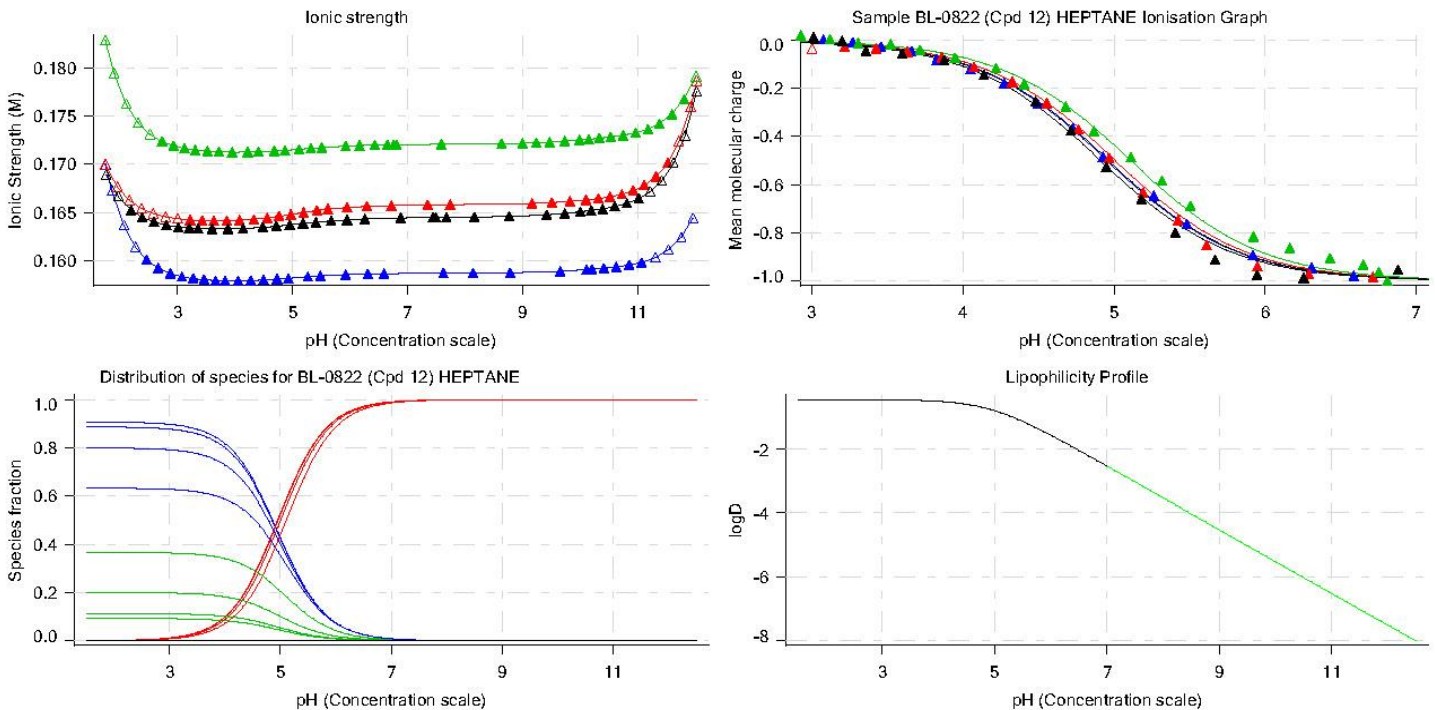



Filename:

**pH-metric Result**

logP (neutral XH) 0.64 ±0.05 (n=50)  
 logP (X-) 0.20 ±0.07 (n=50)  
 RMSD 0.073

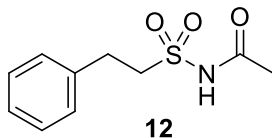

**Warnings and errors**

Errors None  
 Warnings None

**Sample logD values**

| pH     | BL-0822 (Cpd 12) logD | Comment    |
|--------|-----------------------|------------|
| 1.000  | 0.64                  |            |
| 1.200  | 0.64                  | Stomach pH |
| 2.000  | 0.64                  |            |
| 3.000  | 0.63                  |            |
| 4.000  | 0.61                  |            |
| 5.000  | 0.45                  |            |
| 6.000  | 0.25                  |            |
| 6.500  | 0.22                  |            |
| 7.000  | 0.21                  |            |
| 7.400  | 0.20                  | Blood pH   |
| 8.000  | 0.20                  |            |
| 9.000  | 0.20                  |            |
| 10.000 | 0.20                  |            |
| 11.000 | 0.20                  |            |
| 12.000 | 0.20                  |            |

**Graphs**

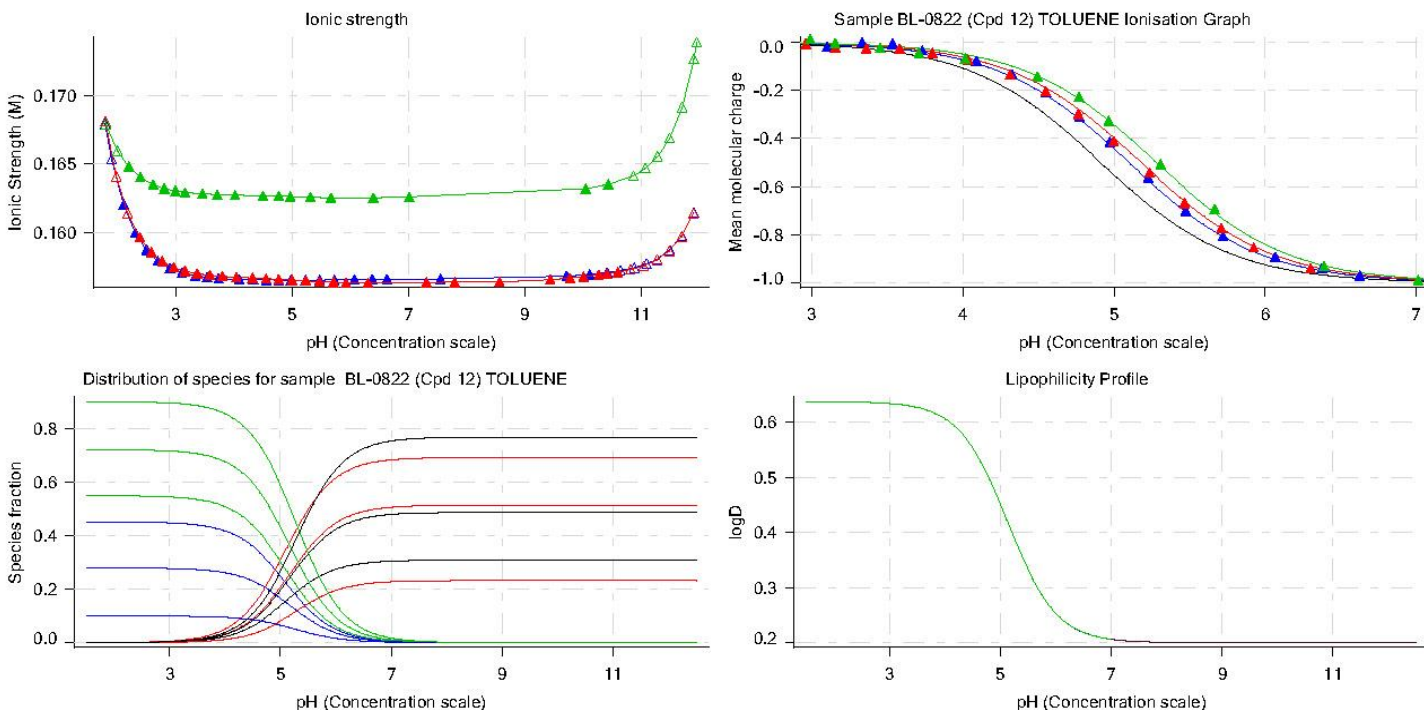

Multiset name: **BL-0789 (Cpd 13)**  
 Filename:

Instrument ID: **T317135**

**pH-metric Result**

logP (neutral XH) 1.58 ±0.06 (n=50)  
 logP (X-) 0.65 ±0.10 (n=50)  
 RMSD 0.289

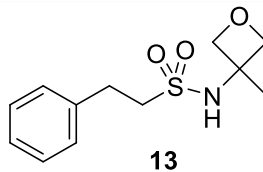

**Warnings and errors**

Errors None  
 Warnings None

**Sample logD values**

| pH     | logD | Comment    |
|--------|------|------------|
| 1.000  | 1.58 |            |
| 1.200  | 1.58 | Stomach pH |
| 2.000  | 1.58 |            |
| 3.000  | 1.58 |            |
| 4.000  | 1.58 |            |
| 5.000  | 1.58 |            |
| 6.000  | 1.58 |            |
| 6.500  | 1.58 |            |
| 7.000  | 1.58 |            |
| 7.400  | 1.58 | Blood pH   |
| 8.000  | 1.58 |            |
| 9.000  | 1.57 |            |
| 10.000 | 1.47 |            |
| 11.000 | 1.07 |            |
| 12.000 | 0.73 |            |

**Graphs**

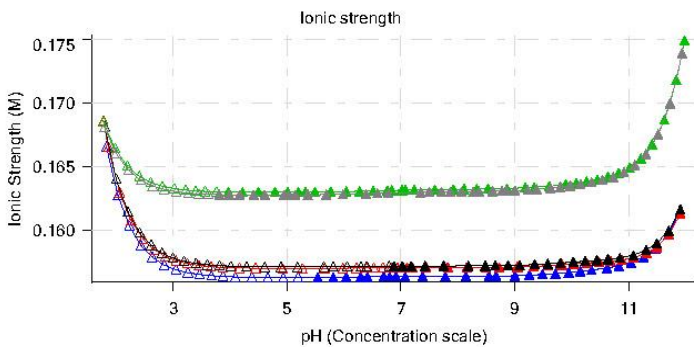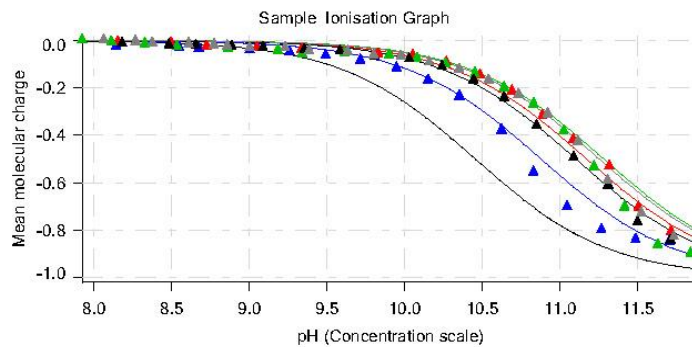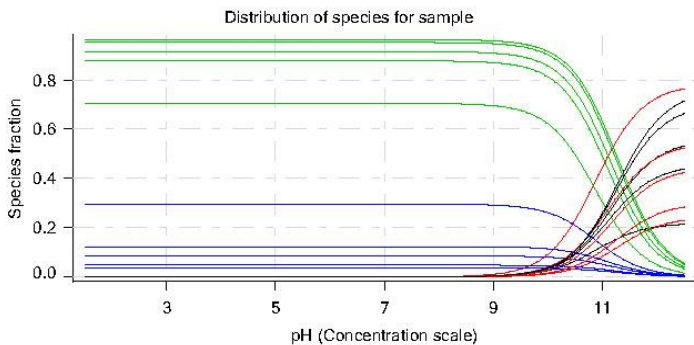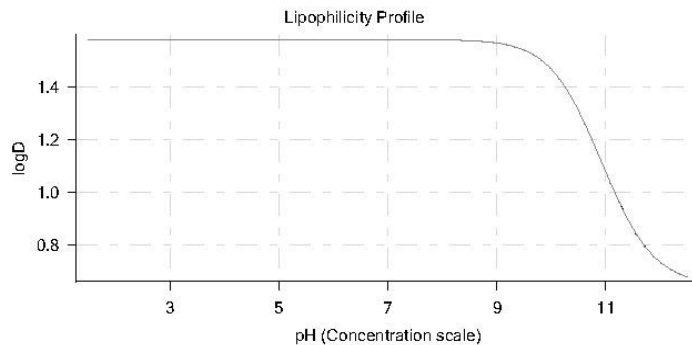

**pH-metric Result**

logP (neutral XH) -0.43 ±0.03 (n=50)  
 logP (X-) -9.04 ±0.55 (n=50)  
 RMSD 0.532

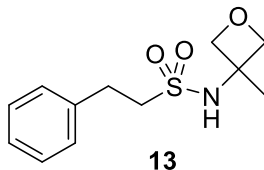

**Warnings and errors**

Errors None  
 Warnings None

**Sample logD values**

| pH     | BL-0789 (Cpd 13)<br>logD | Comment    |
|--------|--------------------------|------------|
| 1.000  | -0.43                    |            |
| 1.200  | -0.43                    | Stomach pH |
| 2.000  | -0.43                    |            |
| 3.000  | -0.43                    |            |
| 4.000  | -0.43                    |            |
| 5.000  | -0.43                    |            |
| 6.000  | -0.43                    |            |
| 6.500  | -0.43                    |            |
| 7.000  | -0.43                    |            |
| 7.400  | -0.43                    | Blood pH   |
| 8.000  | -0.43                    |            |
| 9.000  | -0.44                    |            |
| 10.000 | -0.56                    |            |
| 11.000 | -1.09                    |            |
| 12.000 | -1.99                    |            |

**Graphs**

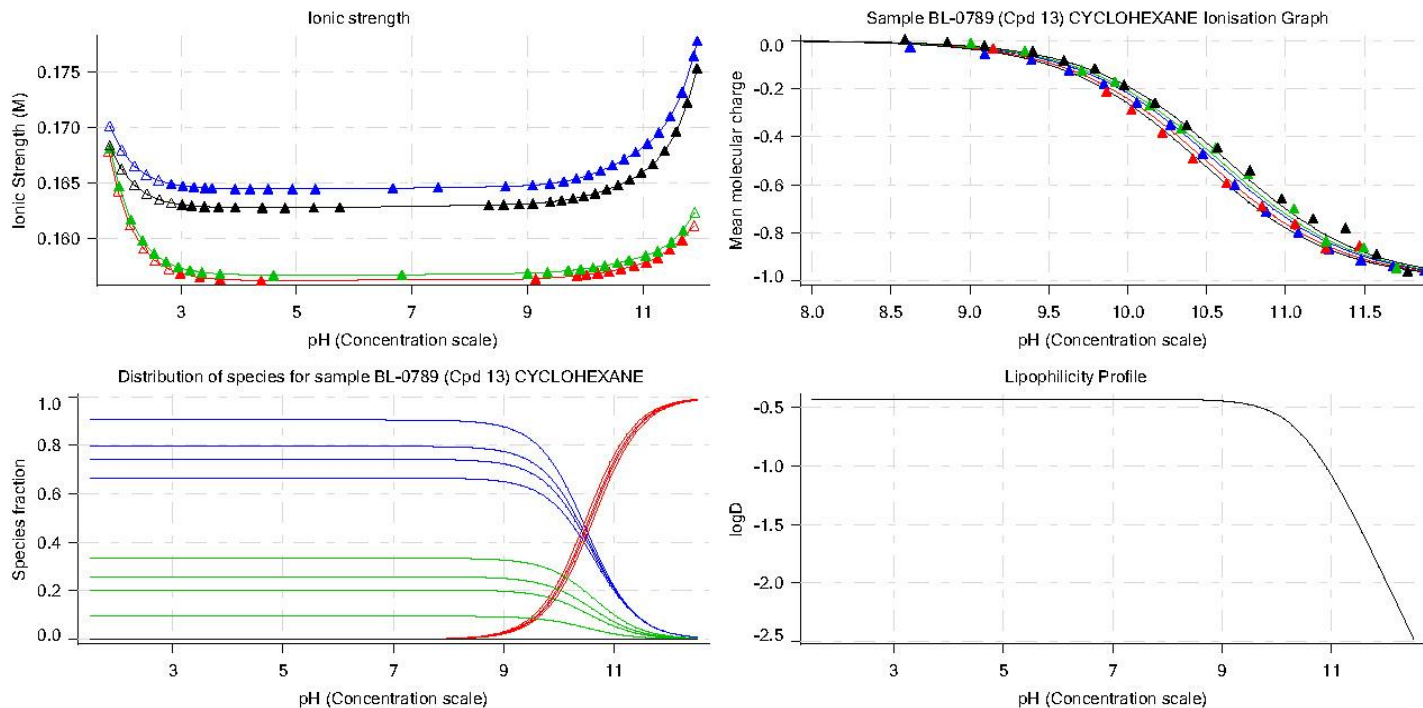

**pH-metric Result**

logP (neutral XH) -0.14 ±0.07 (n=50)  
 logP (X-) -6.00 ±0.54 (n=50)  
 RMSD 0.470

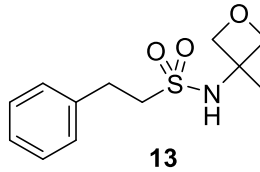

**Warnings and errors**

Errors None  
 Warnings None

**Sample logD values**

| pH     | BL-0789 (Cpd 13) logD | Comment    |
|--------|-----------------------|------------|
| 1.000  | -0.14                 |            |
| 1.200  | -0.14                 | Stomach pH |
| 2.000  | -0.14                 |            |
| 3.000  | -0.14                 |            |
| 4.000  | -0.14                 |            |
| 5.000  | -0.14                 |            |
| 6.000  | -0.14                 |            |
| 6.500  | -0.14                 |            |
| 7.000  | -0.14                 |            |
| 7.400  | -0.14                 | Blood pH   |
| 8.000  | -0.14                 |            |
| 9.000  | -0.16                 |            |
| 10.000 | -0.27                 |            |
| 11.000 | -0.80                 |            |
| 12.000 | -1.70                 |            |

**Graphs**

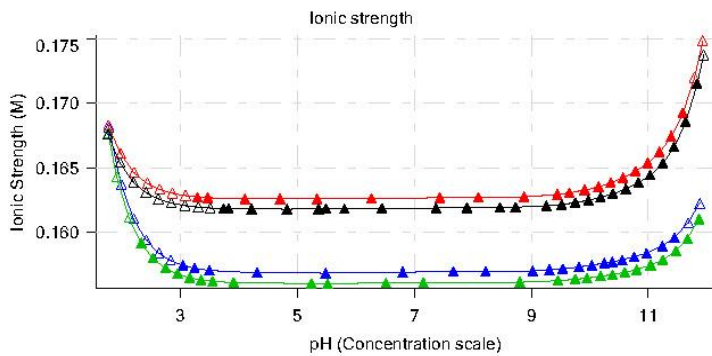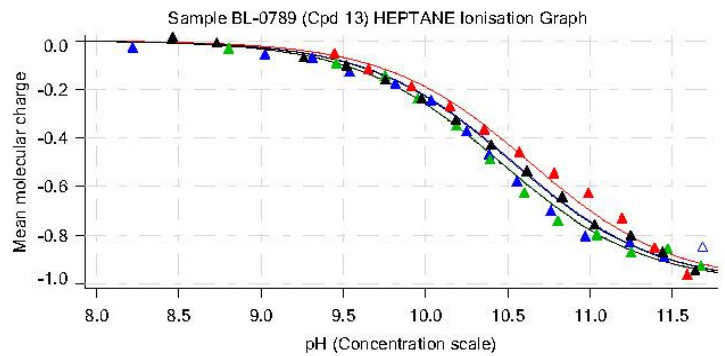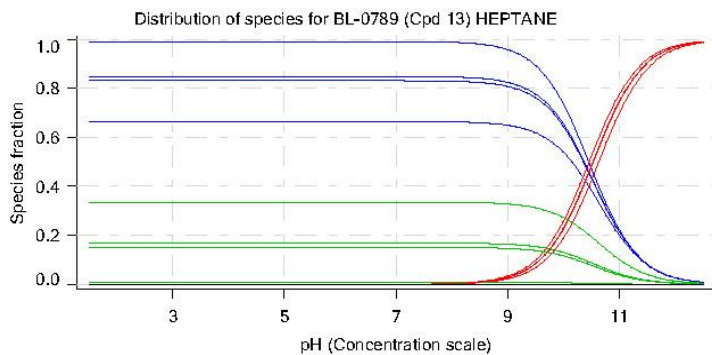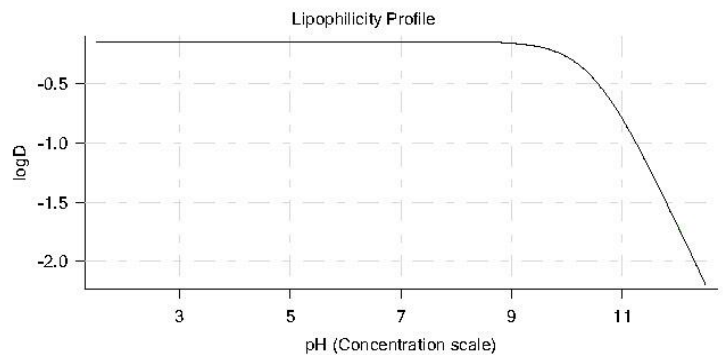

Multiset name: **BL-0789 (Cpd 13) TOLUENE**  
 Filename:

Instrument ID: **T317135**

**pH-metric Result**

logP (neutral XH) 1.06 ±0.01 (n=50)  
 logP (X-) -9.00 ±0.77 (n=50)  
 RMSD 0.365

**Warnings and errors**

Errors None  
 Warnings None

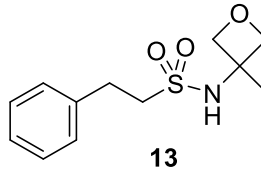

**Sample logD values**

| pH     | BL-0789 (Cpd 13) logD | Comment    |
|--------|-----------------------|------------|
| 1.000  | 1.06                  |            |
| 1.200  | 1.06                  | Stomach pH |
| 2.000  | 1.06                  |            |
| 3.000  | 1.06                  |            |
| 4.000  | 1.06                  |            |
| 5.000  | 1.06                  |            |
| 6.000  | 1.06                  |            |
| 6.500  | 1.06                  |            |
| 7.000  | 1.06                  |            |
| 7.400  | 1.06                  | Blood pH   |
| 8.000  | 1.06                  |            |
| 9.000  | 1.04                  |            |
| 10.000 | 0.92                  |            |
| 11.000 | 0.40                  |            |
| 12.000 | -0.51                 |            |

**Graphs**

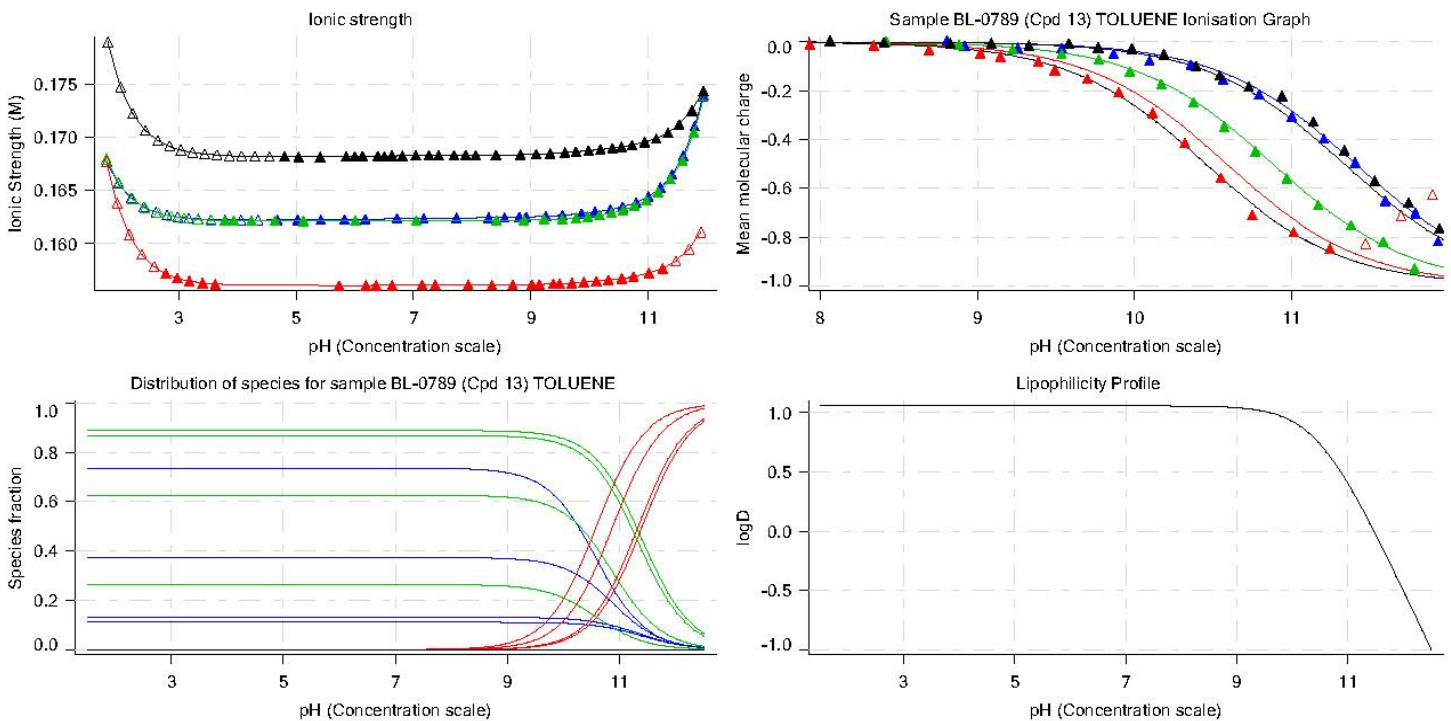

Sample name: **BL-0650 (Cpd 15)**  
 Assay name: **pH-metric high logP**  
 Assay ID: **18I-12003**  
 Filename:

Experiment start time: **9/12/2018 5:19:42 PM**  
 Analyst:  
 Instrument ID: **T317135**

**pH-metric Result**

logP (neutral XH) 1.61 ±0.03 (n=50)  
 logP (X-) -4.54 ±1.16 (n=50)  
 RMSD 56.408

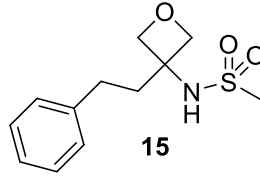

**Warnings and errors**

Errors None  
 Warnings None

**Sample logD values**

| pH     | BL-0650 (Cpd 15) logD | Comment    |
|--------|-----------------------|------------|
| 1.000  | 1.61                  |            |
| 1.200  | 1.61                  | Stomach pH |
| 2.000  | 1.61                  |            |
| 3.000  | 1.61                  |            |
| 4.000  | 1.61                  |            |
| 5.000  | 1.61                  |            |
| 6.000  | 1.61                  |            |
| 6.500  | 1.61                  |            |
| 7.000  | 1.61                  |            |
| 7.400  | 1.61                  | Blood pH   |
| 8.000  | 1.61                  |            |
| 9.000  | 1.57                  |            |
| 10.000 | 1.33                  |            |
| 11.000 | 0.61                  |            |
| 12.000 | -0.34                 |            |

**Graphs**

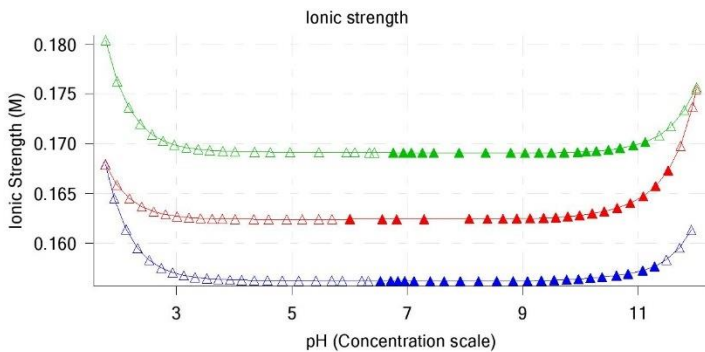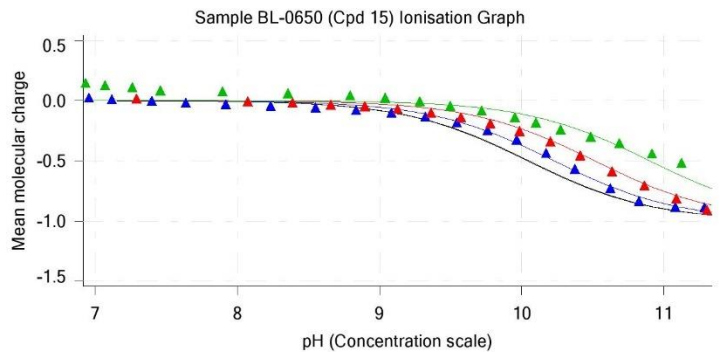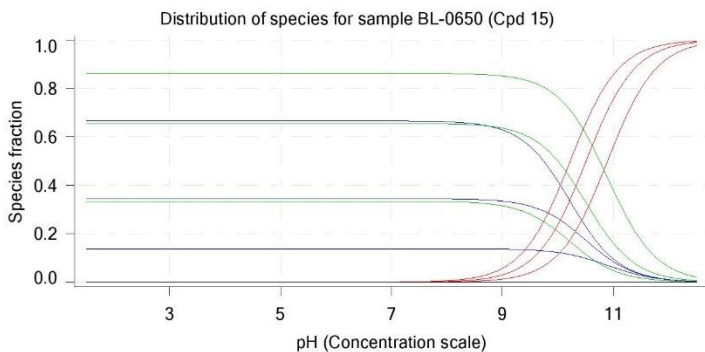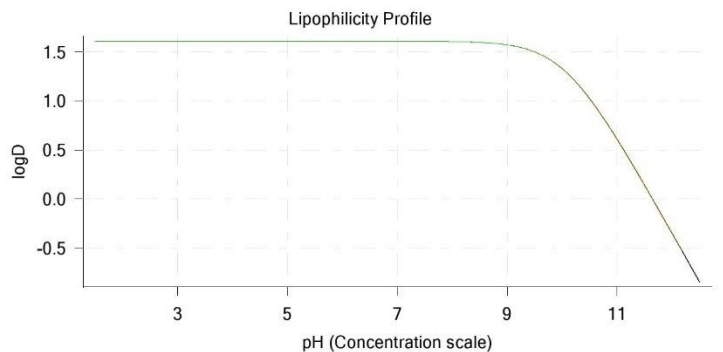

Multiset name: **BL-0650 (Cpd 15) CYCLOHEXANE**  
 Filename:

Instrument ID: **T317135**

**pH-metric Result**

logP (neutral XH) -0.26 ±0.01 (n=48)  
 logP (X-) -7.76 ±0.99 (n=48)  
 RMSD 0.346

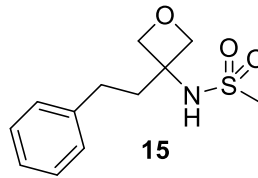

**Warnings and errors**

Errors None  
 Warnings None

**Sample logD values**

| pH     | BL-0650 (Cpd 15)<br>CYCLOHEXANE logD | Comment    |
|--------|--------------------------------------|------------|
| 1.000  | -0.26                                |            |
| 1.200  | -0.26                                | Stomach pH |
| 2.000  | -0.26                                |            |
| 3.000  | -0.26                                |            |
| 4.000  | -0.26                                |            |
| 5.000  | -0.26                                |            |
| 6.000  | -0.26                                |            |
| 6.500  | -0.26                                |            |
| 7.000  | -0.26                                |            |
| 7.400  | -0.26                                | Blood pH   |
| 8.000  | -0.26                                |            |
| 9.000  | -0.30                                |            |
| 10.000 | -0.54                                |            |
| 11.000 | -1.26                                |            |
| 12.000 | -2.22                                |            |

**Graphs**

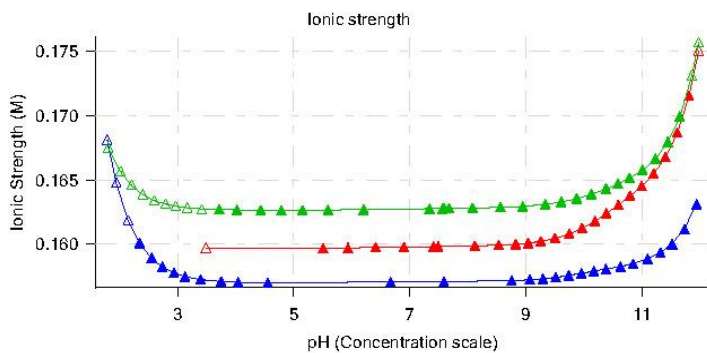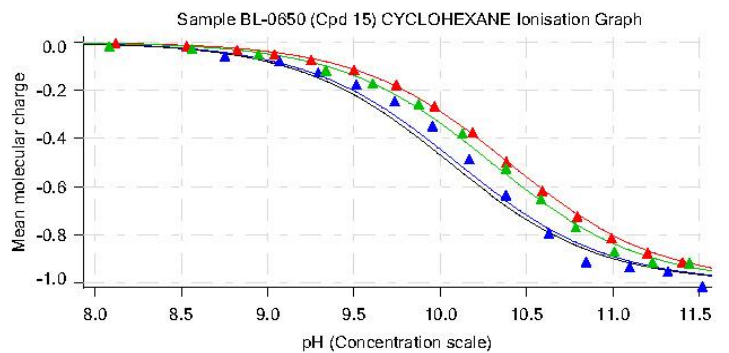

Multiset name: **BL-0650 (Cpd 15) CYCLOHEXANE**  
 Filename:

Instrument ID: **T317135**

**Graphs (continued)**

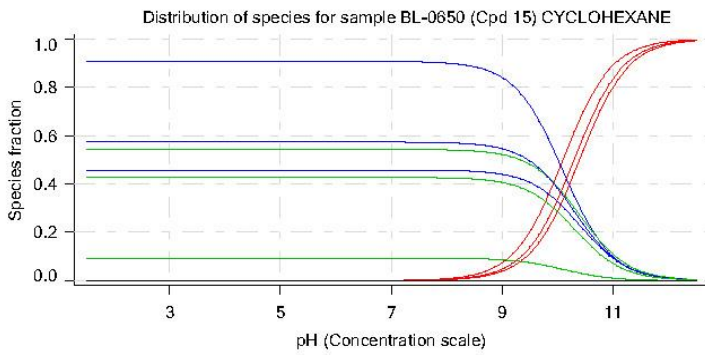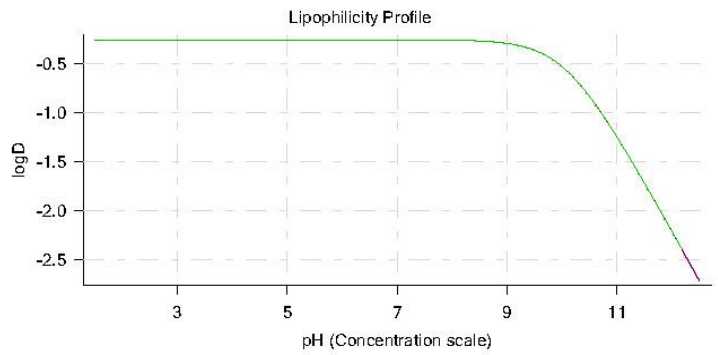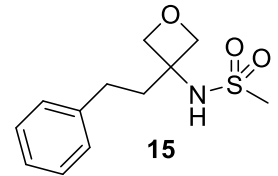



Multiset name: **BL-0650 (Cpd 15) HEPTANE**  
 Filename:

Instrument ID: **T317135**

**pH-metric Result**

logP (neutral XH) 0.01 ±0.02 (n=50)  
 logP (X-) -8.00 ±0.92 (n=50)  
 RMSD 0.260

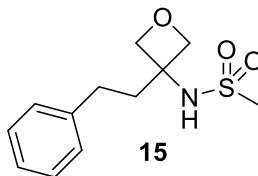

**Warnings and errors**

Errors None  
 Warnings None

**Sample logD values**

| pH     | BL-0650 (Cpd 15) HEPTANE logD | Comment    |
|--------|-------------------------------|------------|
| 1.000  | 0.01                          |            |
| 1.200  | 0.01                          | Stomach pH |
| 2.000  | 0.01                          |            |
| 3.000  | 0.01                          |            |
| 4.000  | 0.01                          |            |
| 5.000  | 0.01                          |            |
| 6.000  | 0.01                          |            |
| 6.500  | 0.01                          |            |
| 7.000  | 0.01                          |            |
| 7.400  | 0.01                          | Blood pH   |
| 8.000  | 0.01                          |            |
| 9.000  | -0.02                         |            |
| 10.000 | -0.26                         |            |
| 11.000 | -0.98                         |            |
| 12.000 | -1.94                         |            |

**Graphs**

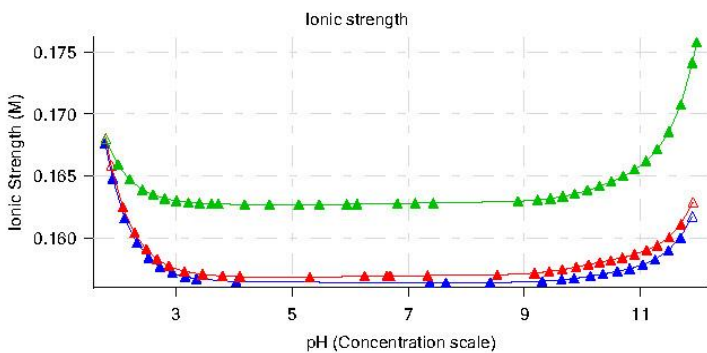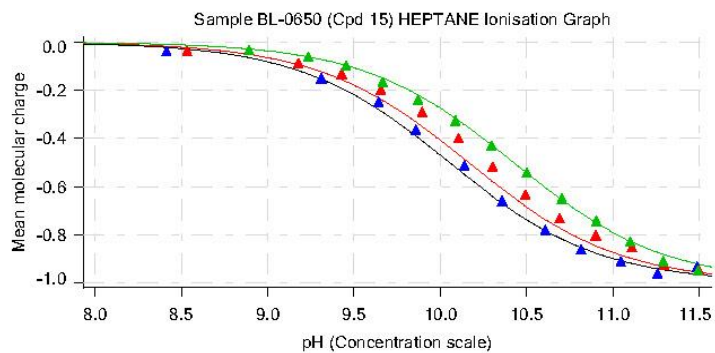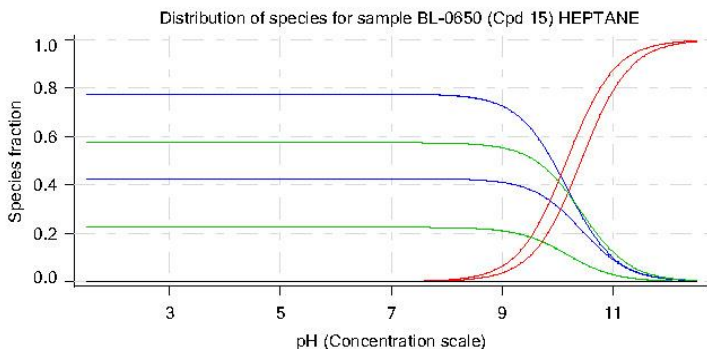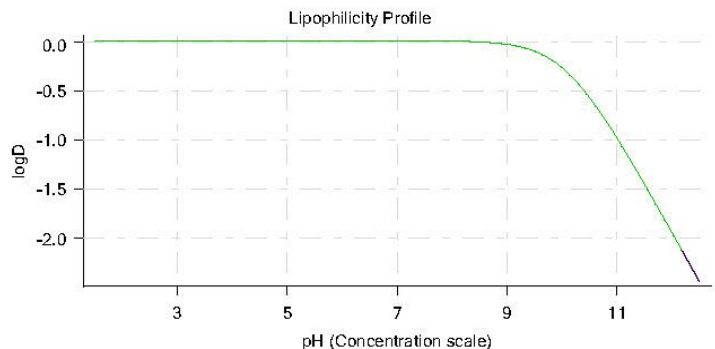

Sample name: **BL-0650 (Cpd 15) TOLUENE**  
 Assay name: **pH-metric medium logP**  
 Assay ID: **20K-10004**  
 Filename:

Experiment start time: **11/10/2020 9:32:21 AM**  
 Analyst:  
 Instrument ID: **T317135**

**pH-metric Result**

logP (neutral XH) 1.18 ±0.01 (n=50)  
 logP (X-) -9.50 ±0.89 (n=50)  
 RMSD 0.401

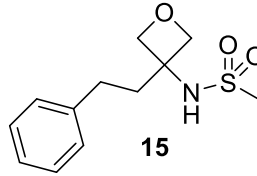

**Warnings and errors**

Errors None  
 Warnings None

**Sample logD values**

| pH     | BL-0650 (Cpd 15) TOLUENE logD | Comment    |
|--------|-------------------------------|------------|
| 1.000  | 1.18                          |            |
| 1.200  | 1.18                          | Stomach pH |
| 2.000  | 1.18                          |            |
| 3.000  | 1.18                          |            |
| 4.000  | 1.18                          |            |
| 5.000  | 1.18                          |            |
| 6.000  | 1.18                          |            |
| 6.500  | 1.18                          |            |
| 7.000  | 1.18                          |            |
| 7.400  | 1.18                          | Blood pH   |
| 8.000  | 1.18                          |            |
| 9.000  | 1.15                          |            |
| 10.000 | 0.91                          |            |
| 11.000 | 0.19                          |            |
| 12.000 | -0.77                         |            |

**Graphs**

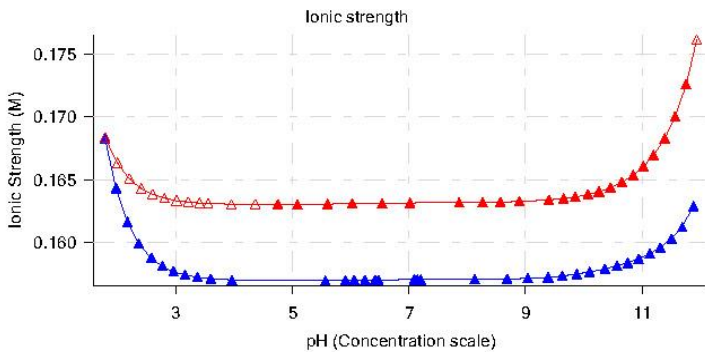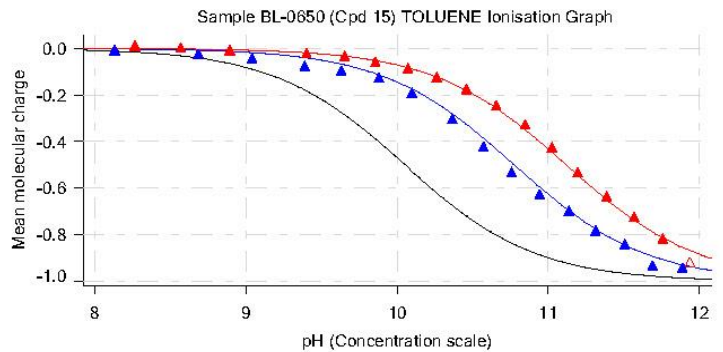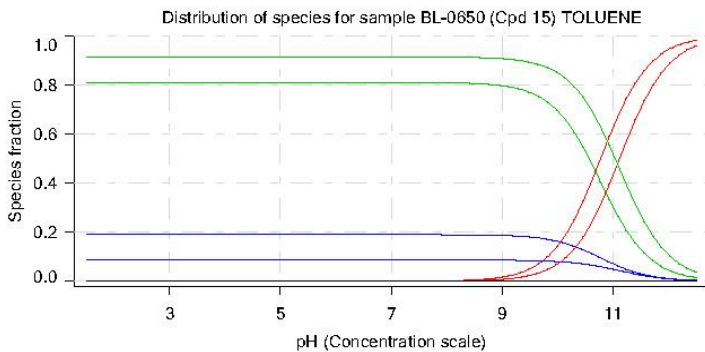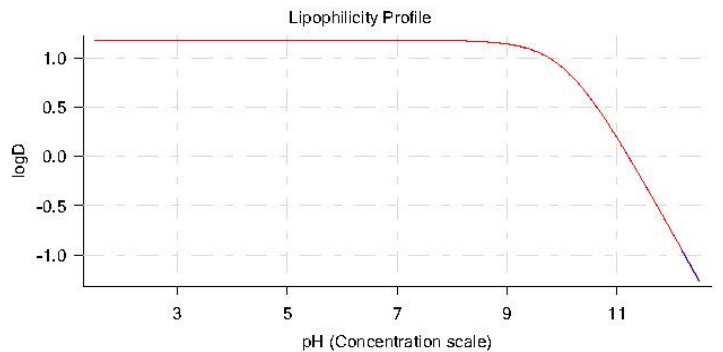

Sample name: **BL-0679 (Cpd 21)**  
 Assay name: **pH-metric medium logP**  
 Assay ID: **19I-28009**  
 Filename:

Experiment start time: **9/28/2019 6:43:19 PM**  
 Analyst:  
 Instrument ID: **T317135**

**pH-metric Result**

logP (neutral XH) 0.88 ±0.02 (n=50)  
 logP (X-) -5.73 ±2.18 (n=50)  
 RMSD 0.870

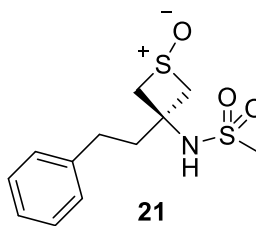

**Warnings and errors**

Errors None  
 Warnings None

**Sample logD values**

| pH     | BL-0679 (Cpd 21) logD | Comment    |
|--------|-----------------------|------------|
| 1.000  | 0.88                  |            |
| 1.200  | 0.88                  | Stomach pH |
| 2.000  | 0.88                  |            |
| 3.000  | 0.88                  |            |
| 4.000  | 0.88                  |            |
| 5.000  | 0.88                  |            |
| 6.000  | 0.88                  |            |
| 6.500  | 0.88                  |            |
| 7.000  | 0.88                  |            |
| 7.400  | 0.87                  | Blood pH   |
| 8.000  | 0.87                  |            |
| 9.000  | 0.82                  |            |
| 10.000 | 0.49                  |            |
| 11.000 | -0.30                 |            |
| 12.000 | -1.28                 |            |

**Graphs**

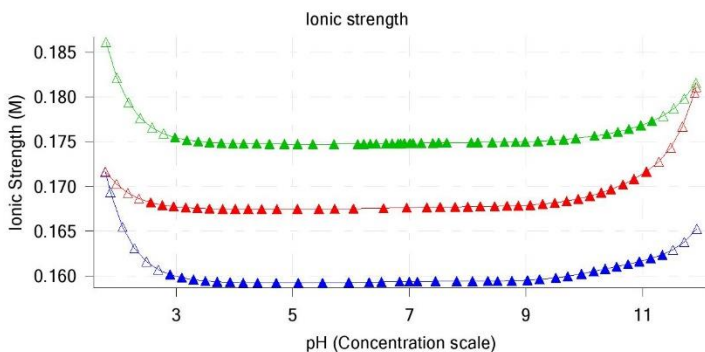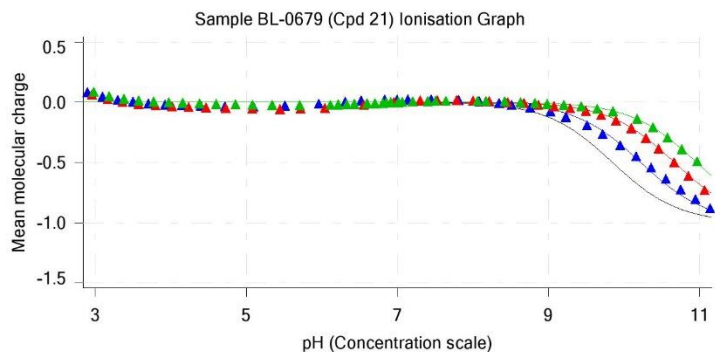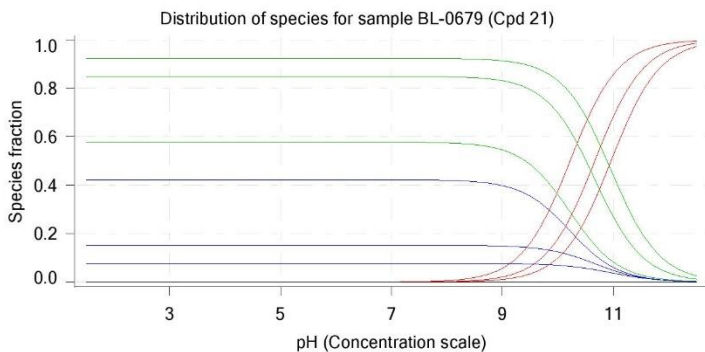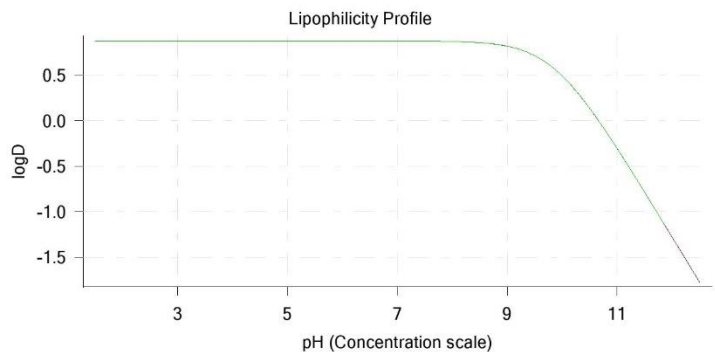

Multiset name: **BL-0672 (Cpd 24)**  
 Filename:

Instrument ID: **T317135**

**pH-metric Result**

logP (neutral XH) 1.03 ±0.01 (n=50)  
 logP (X-) -8.50 ±1.54 (n=50)  
 RMSD 0.429

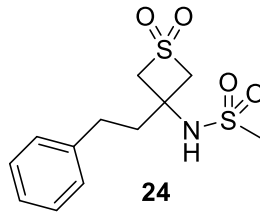

**Warnings and errors**

Errors None  
 Warnings None

**Sample logD values**

| pH     | KKF-I-493   | Comment    |
|--------|-------------|------------|
|        | <b>logD</b> |            |
| 1.000  | 1.03        |            |
| 1.200  | 1.03        | Stomach pH |
| 2.000  | 1.03        |            |
| 3.000  | 1.03        |            |
| 4.000  | 1.03        |            |
| 5.000  | 1.03        |            |
| 6.000  | 1.03        |            |
| 6.500  | 1.03        |            |
| 7.000  | 1.03        |            |
| 7.400  | 1.03        | Blood pH   |
| 8.000  | 1.02        |            |
| 9.000  | 0.90        |            |
| 10.000 | 0.37        |            |
| 11.000 | -0.53       |            |
| 12.000 | -1.52       |            |

**Graphs**

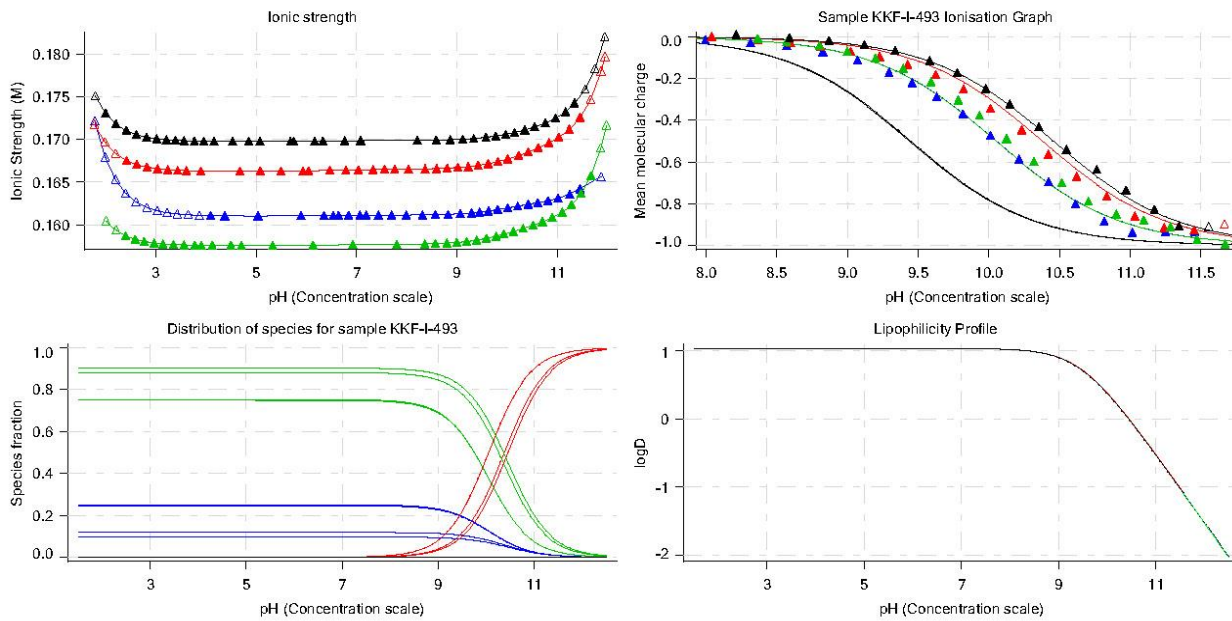

Multiset name: **BL-0689 (Cpd 26)**

Instrument ID: **T317135**

Filename:

**pH-metric Result**

logP (neutral XH) 1.83 ±0.05 (n=50)  
 logP (X-) -8.49 ±0.69 (n=50)  
 RMSD 0.456

**Warnings and errors**

Errors None  
 Warnings None

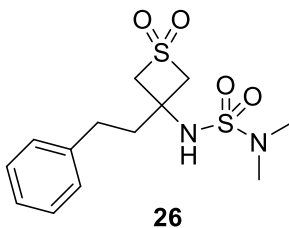

**Sample logD values**

| pH     | BL-0689 (Cpd 26) logD | Comment    |
|--------|-----------------------|------------|
| 1.000  | 1.83                  |            |
| 1.200  | 1.83                  | Stomach pH |
| 2.000  | 1.83                  |            |
| 3.000  | 1.83                  |            |
| 4.000  | 1.83                  |            |
| 5.000  | 1.83                  |            |
| 6.000  | 1.83                  |            |
| 6.500  | 1.83                  |            |
| 7.000  | 1.83                  |            |
| 7.400  | 1.82                  | Blood pH   |
| 8.000  | 1.81                  |            |
| 9.000  | 1.71                  |            |
| 10.000 | 1.21                  |            |
| 11.000 | 0.31                  |            |
| 12.000 | -0.67                 |            |

**Graphs**

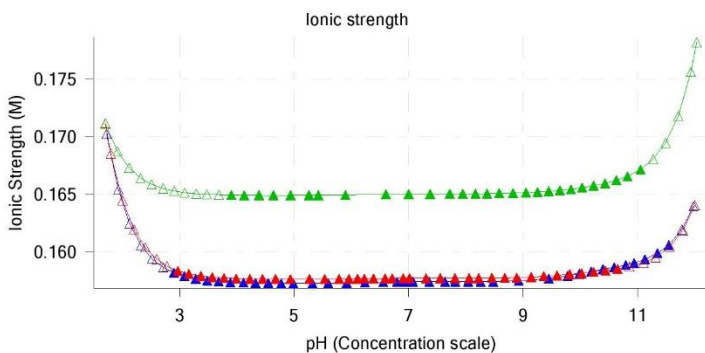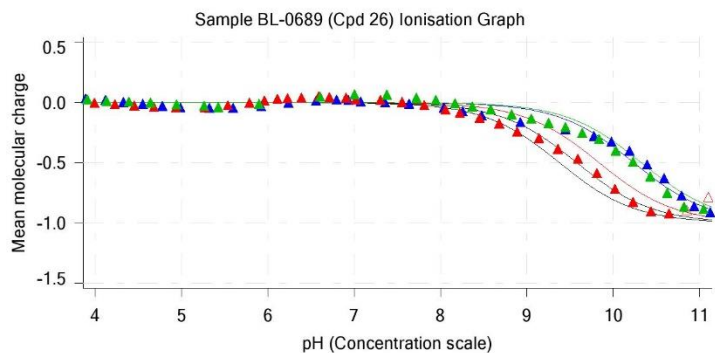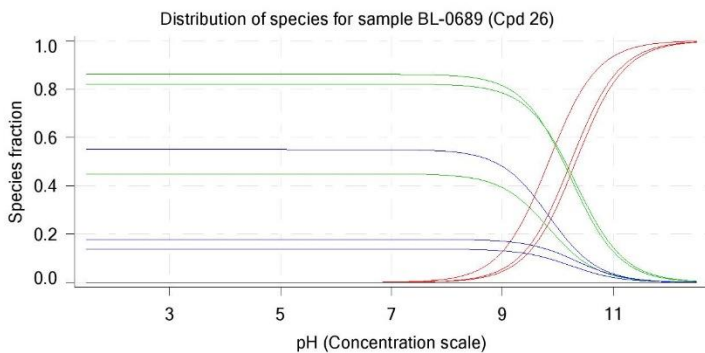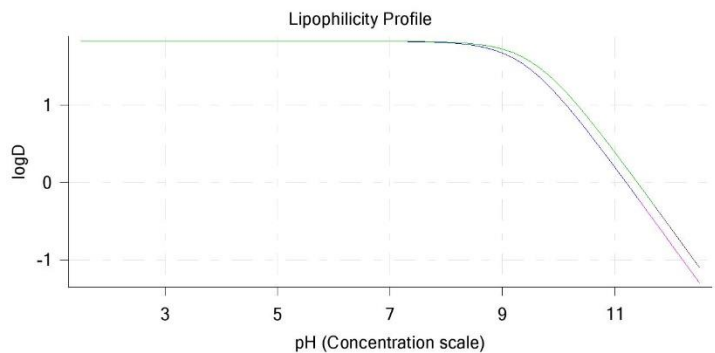

Sample name: **BL-0792 (Cpd 27)**  
 Assay name: **pH-metric medium logP**  
 Assay ID: **20A-21003**  
 Filename:

Experiment start time: **1/21/2020 5:35:07 PM**  
 Analyst:  
 Instrument ID: **T317135**

**pH-metric Result**

logP (neutral XH) 0.58 ±0.02 (n=50)  
 logP (X-) -9.45 ±0.85 (n=50)  
 RMSD 0.155

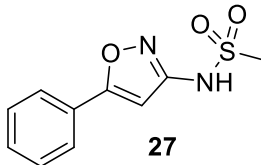

**Warnings and errors**

Errors None  
 Warnings None

**Sample logD values**

| pH     | BL-0792 (Cpd 27) logD | Comment    |
|--------|-----------------------|------------|
| 1.000  | 0.58                  |            |
| 1.200  | 0.58                  | Stomach pH |
| 2.000  | 0.58                  |            |
| 3.000  | 0.58                  |            |
| 4.000  | 0.58                  |            |
| 5.000  | 0.57                  |            |
| 6.000  | 0.45                  |            |
| 6.500  | 0.25                  |            |
| 7.000  | -0.08                 |            |
| 7.400  | -0.42                 | Blood pH   |
| 8.000  | -0.99                 |            |
| 9.000  | -1.98                 |            |
| 10.000 | -2.98                 |            |
| 11.000 | -3.98                 |            |
| 12.000 | -4.98                 |            |

**Graphs**

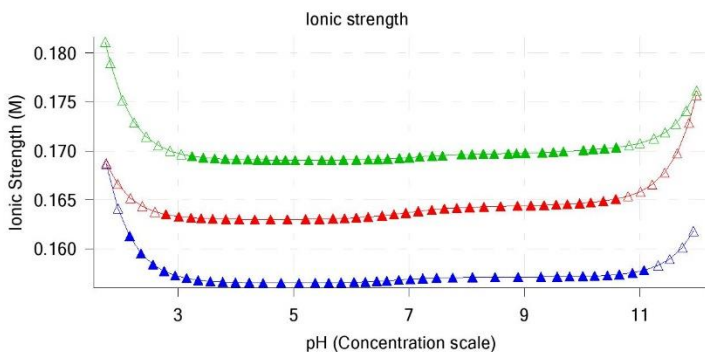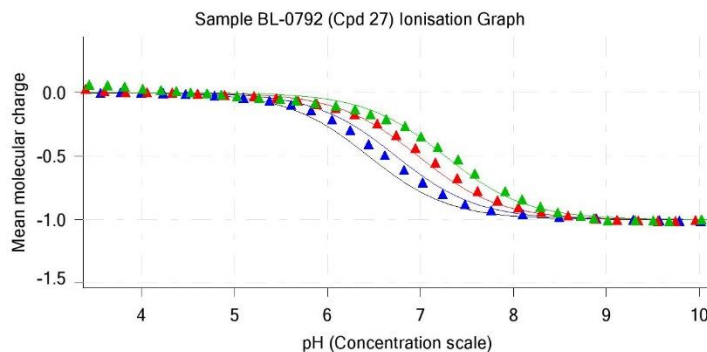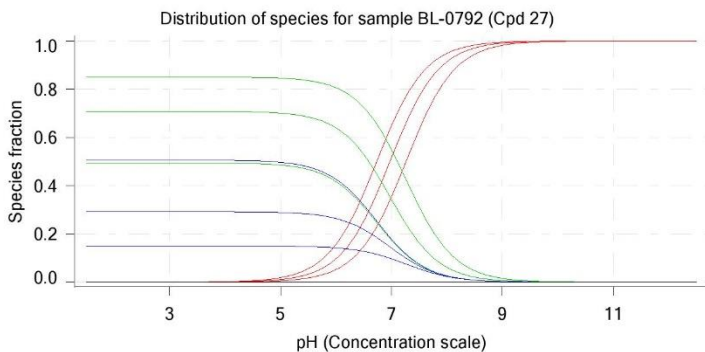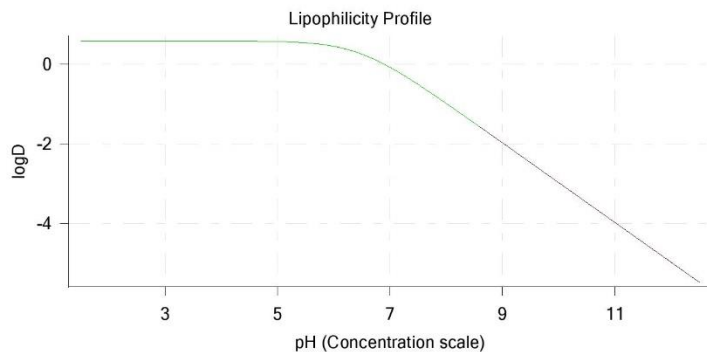

Sample name: **BL-0793 (Cpd 28)**  
 Assay name: **pH-metric medium logP**  
 Assay ID: **20A-29003**  
 Filename:

Experiment start time: **1/29/2020 12:17:42 PM**  
 Analyst:  
 Instrument ID: **T317135**

**pH-metric Result**

logP (neutral XH) 1.76 ±0.03 (n=50)  
 logP (X-) 0.26 ±0.06 (n=50)  
 RMSD 0.211

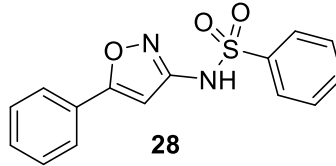

**Warnings and errors**

Errors None  
 Warnings None

**Sample logD values**

| pH     | BL-0793 (Cpd 28) logD | Comment    |
|--------|-----------------------|------------|
| 1.000  | 1.76                  |            |
| 1.200  | 1.76                  | Stomach pH |
| 2.000  | 1.76                  |            |
| 3.000  | 1.76                  |            |
| 4.000  | 1.76                  |            |
| 5.000  | 1.75                  |            |
| 6.000  | 1.67                  |            |
| 6.500  | 1.52                  |            |
| 7.000  | 1.26                  |            |
| 7.400  | 0.99                  | Blood pH   |
| 8.000  | 0.60                  |            |
| 9.000  | 0.31                  |            |
| 10.000 | 0.26                  |            |
| 11.000 | 0.26                  |            |
| 12.000 | 0.26                  |            |

**Graphs**

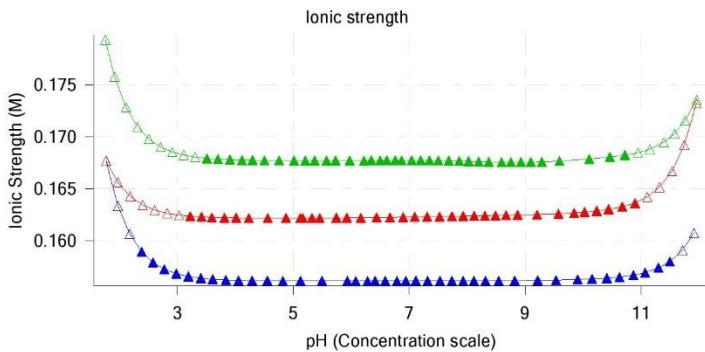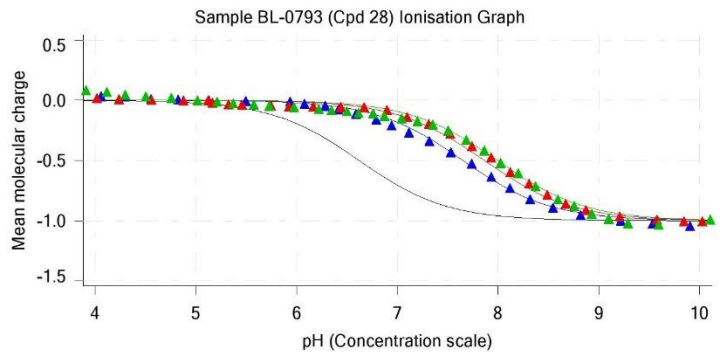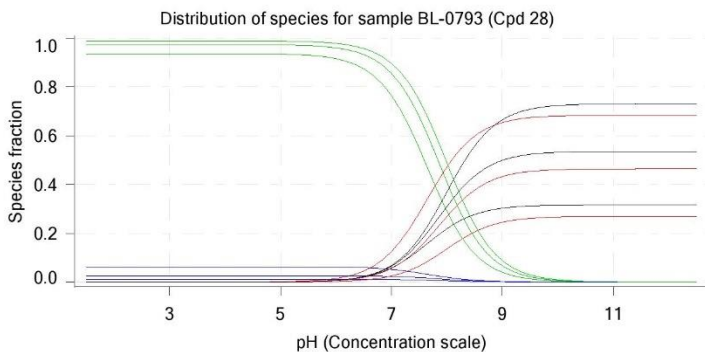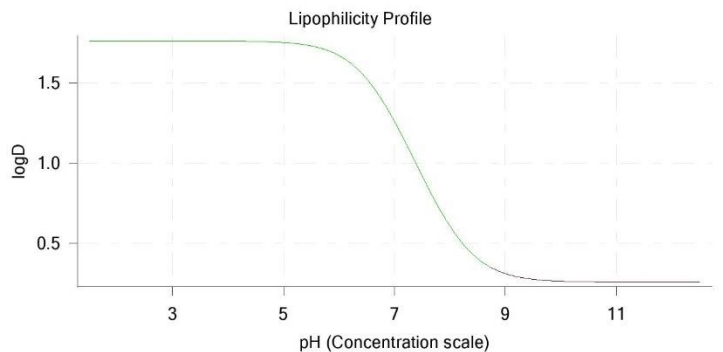

Sample name: **BL-0797 (Cpd 29)**  
 Assay name: **pH-metric medium logP**  
 Assay ID: **20A-27004**  
 Filename:

Experiment start time: **1/27/2020 5:30:43 PM**  
 Analyst:  
 Instrument ID: **T317135**

**pH-metric Result**

logP (neutral XH) 0.85 ±0.01 (n=50)  
 logP (X-) -9.98 ±0.71 (n=50)  
 RMSD 0.176

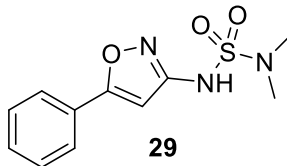

**Warnings and errors**

Errors None  
 Warnings None

**Sample logD values**

| pH     | BL-0797 (Cpd 29) logD | Comment    |
|--------|-----------------------|------------|
| 1.000  | 0.85                  |            |
| 1.200  | 0.85                  | Stomach pH |
| 2.000  | 0.85                  |            |
| 3.000  | 0.85                  |            |
| 4.000  | 0.85                  |            |
| 5.000  | 0.84                  |            |
| 6.000  | 0.82                  |            |
| 6.500  | 0.76                  |            |
| 7.000  | 0.62                  |            |
| 7.400  | 0.42                  | Blood pH   |
| 8.000  | -0.04                 |            |
| 9.000  | -0.99                 |            |
| 10.000 | -1.98                 |            |
| 11.000 | -2.98                 |            |
| 12.000 | -3.98                 |            |

**Graphs**

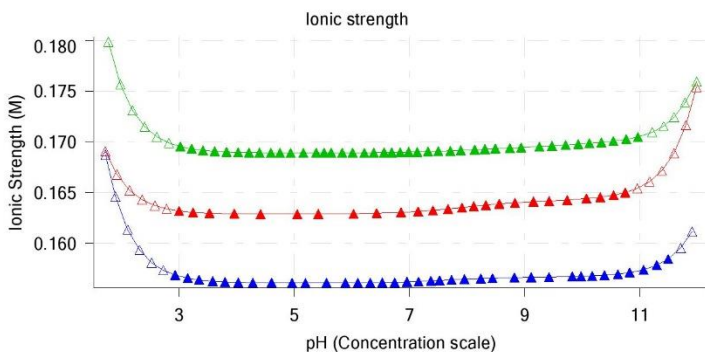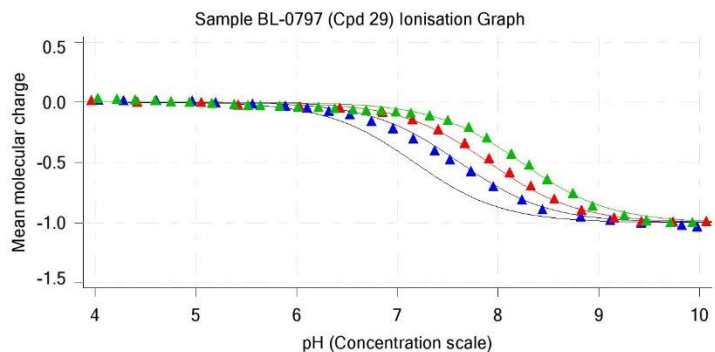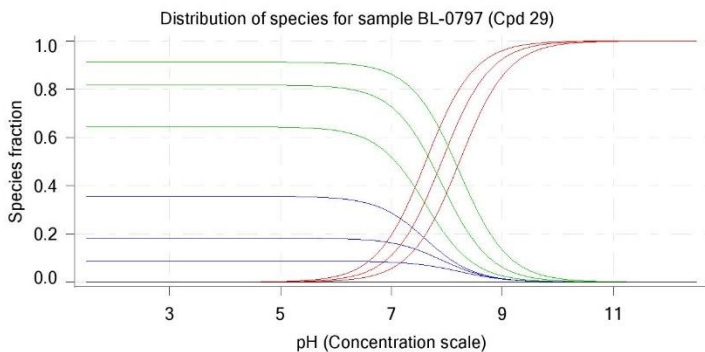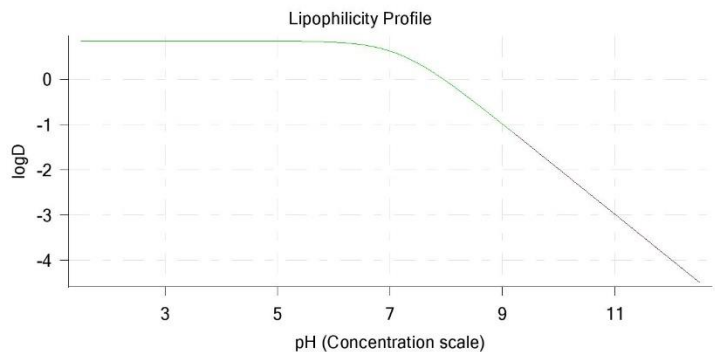



Sample name: **BL-0771 (Cpd 30)**  
 Assay name: **pH-metric medium logP**  
 Assay ID: **19J-25003**  
 Filename:

Experiment start time: **10/25/2019 4:14:54 PM**  
 Analyst:  
 Instrument ID: **T317135**

**pH-metric Result**

logP (neutral XH) 1.16 ±0.03 (n=50)  
 logP (X-) -10.00 ±0.61 (n=50)  
 RMSD 0.141

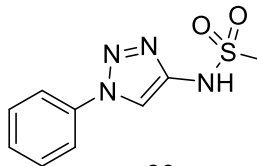

**30**

**Warnings and errors**

Errors None  
 Warnings None

**Sample logD values**

| pH     | BL-0771 (Cpd 30) logD | Comment    |
|--------|-----------------------|------------|
| 1.000  | 1.16                  |            |
| 1.200  | 1.16                  | Stomach pH |
| 2.000  | 1.16                  |            |
| 3.000  | 1.16                  |            |
| 4.000  | 1.16                  |            |
| 5.000  | 1.14                  |            |
| 6.000  | 1.00                  |            |
| 6.500  | 0.77                  |            |
| 7.000  | 0.41                  |            |
| 7.400  | 0.06                  | Blood pH   |
| 8.000  | -0.51                 |            |
| 9.000  | -1.50                 |            |
| 10.000 | -2.50                 |            |
| 11.000 | -3.50                 |            |
| 12.000 | -4.50                 |            |

**Graphs**

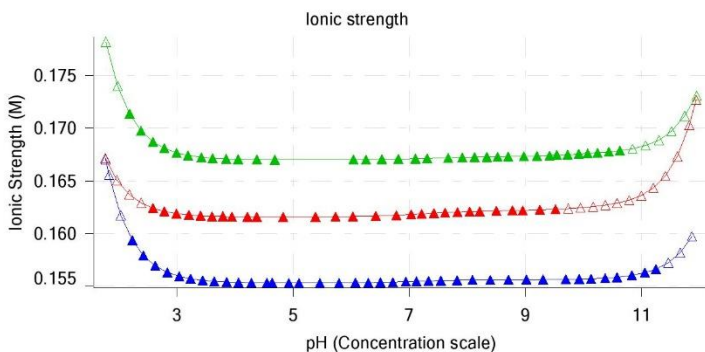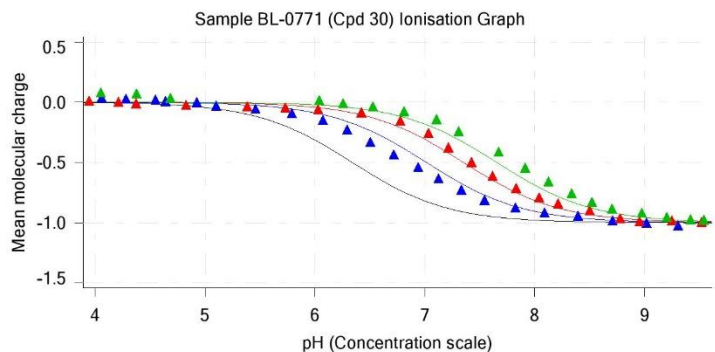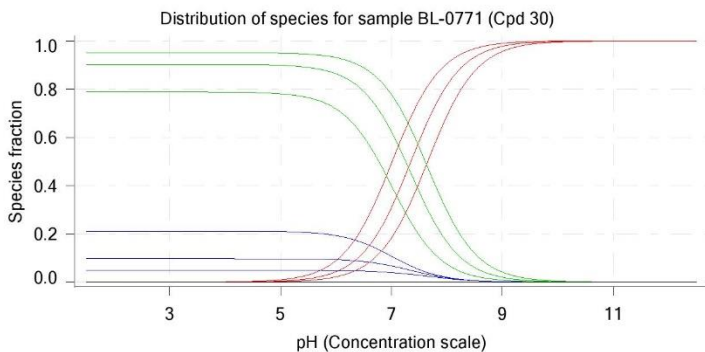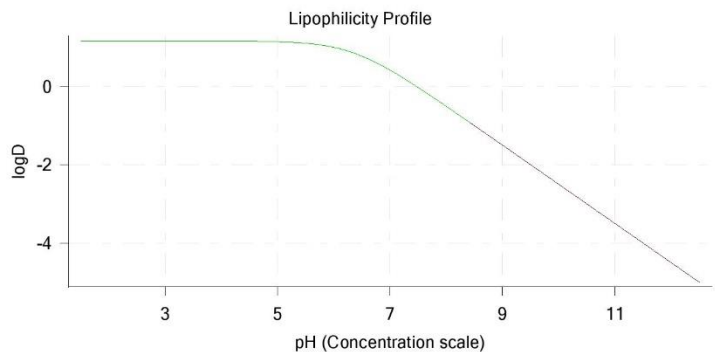

Sample name: **BL-0772 (Cpd 31)**  
 Assay name: **pH-metric medium logP**  
 Assay ID: **19J-19006**  
 Filename:

Experiment start time: **10/19/2019 3:18:57 PM**  
 Analyst:  
 Instrument ID: **T317135**

**pH-metric Result**

logP (neutral XH) 2.55 ±0.04 (n=50)  
 logP (X-) -8.00 ±3.75 (n=50)  
 RMSD 0.133

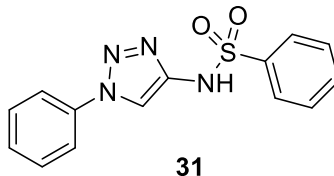

**Warnings and errors**

Errors None  
 Warnings None

**Sample logD values**

| pH     | BL-0772 (Cpd 31) logD | Comment    |
|--------|-----------------------|------------|
| 1.000  | 2.55                  |            |
| 1.200  | 2.55                  | Stomach pH |
| 2.000  | 2.55                  |            |
| 3.000  | 2.54                  |            |
| 4.000  | 2.54                  |            |
| 5.000  | 2.50                  |            |
| 6.000  | 2.21                  |            |
| 6.500  | 1.87                  |            |
| 7.000  | 1.44                  |            |
| 7.400  | 1.06                  | Blood pH   |
| 8.000  | 0.47                  |            |
| 9.000  | -0.53                 |            |
| 10.000 | -1.52                 |            |
| 11.000 | -2.52                 |            |
| 12.000 | -3.52                 |            |

**Graphs**

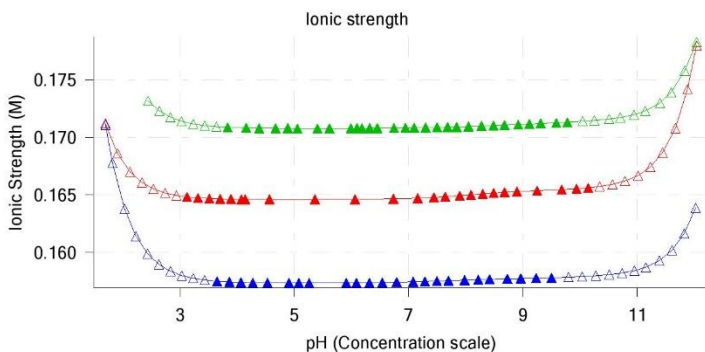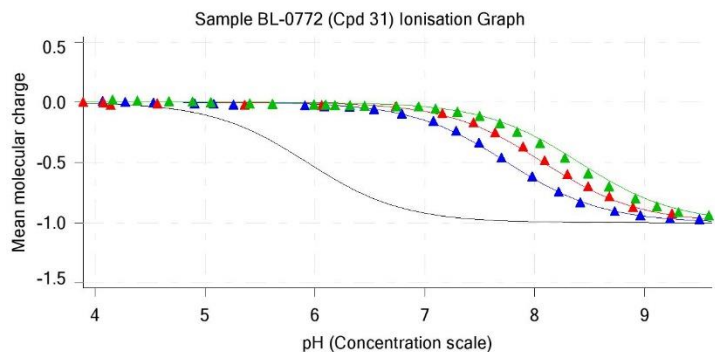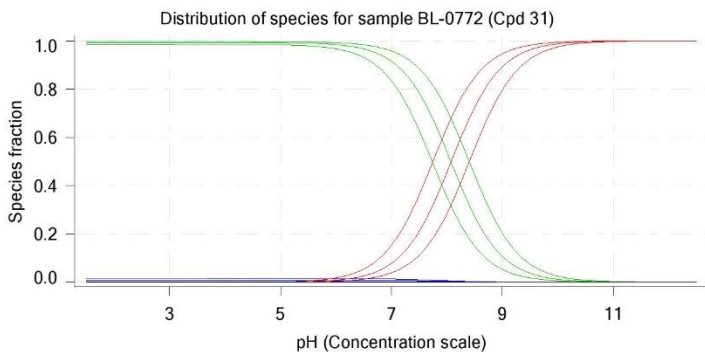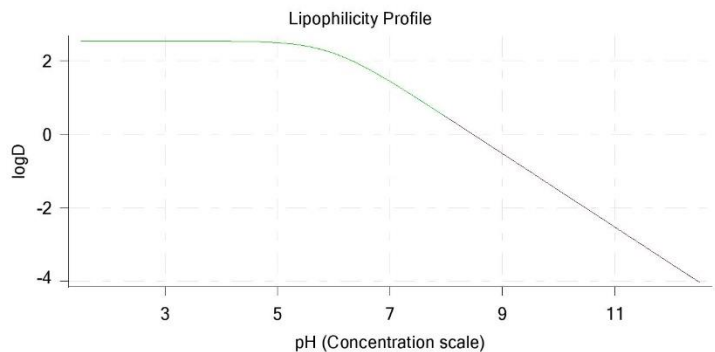

Sample name: **BL-0773 (Cpd 32)**  
 Assay name: **pH-metric medium logP**  
 Assay ID: **19J-20006**  
 Filename:

Experiment start time: **10/20/2019 1:32:14 PM**  
 Analyst:  
 Instrument ID: **T317135**

**pH-metric Result**

logP (neutral XH) 1.72 ±0.01 (n=49)  
 logP (X-) -9.50 ±0.59 (n=49)  
 RMSD 0.216

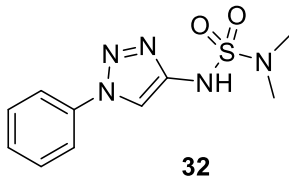

**Warnings and errors**

Errors None  
 Warnings None

**Sample logD values**

| pH     | BL-0773 (Cpd 32) logD | Comment    |
|--------|-----------------------|------------|
| 1.000  | 1.72                  |            |
| 1.200  | 1.72                  | Stomach pH |
| 2.000  | 1.72                  |            |
| 3.000  | 1.72                  |            |
| 4.000  | 1.72                  |            |
| 5.000  | 1.70                  |            |
| 6.000  | 1.58                  |            |
| 6.500  | 1.38                  |            |
| 7.000  | 1.04                  |            |
| 7.400  | 0.69                  | Blood pH   |
| 8.000  | 0.13                  |            |
| 9.000  | -0.86                 |            |
| 10.000 | -1.86                 |            |
| 11.000 | -2.86                 |            |
| 12.000 | -3.86                 |            |

**Graphs**

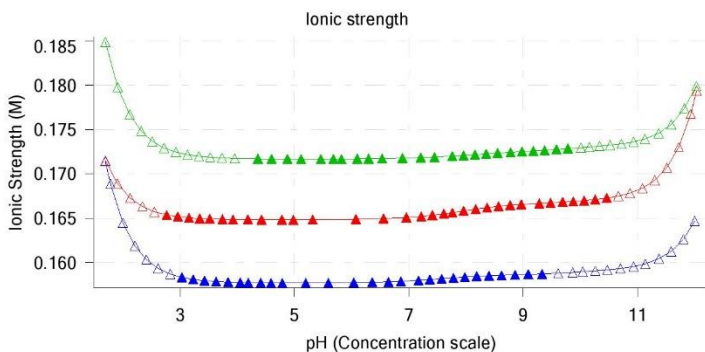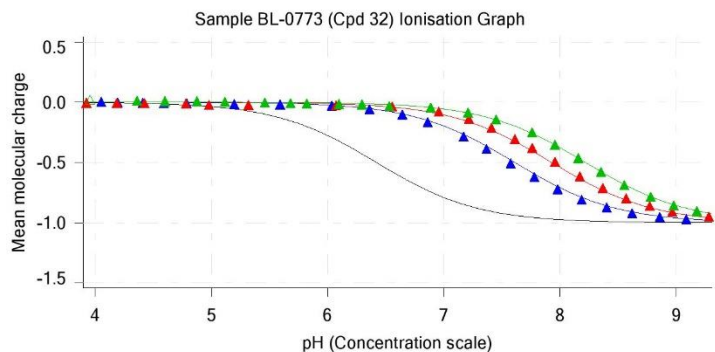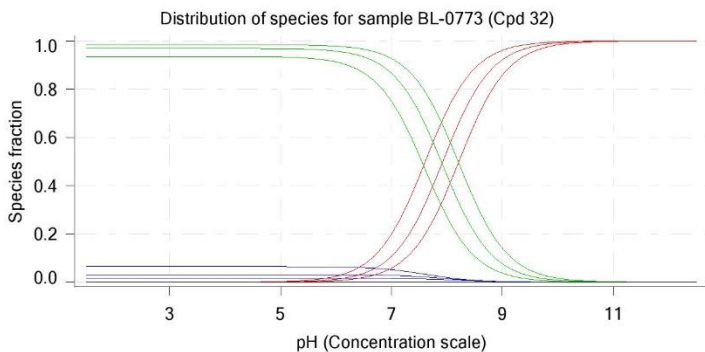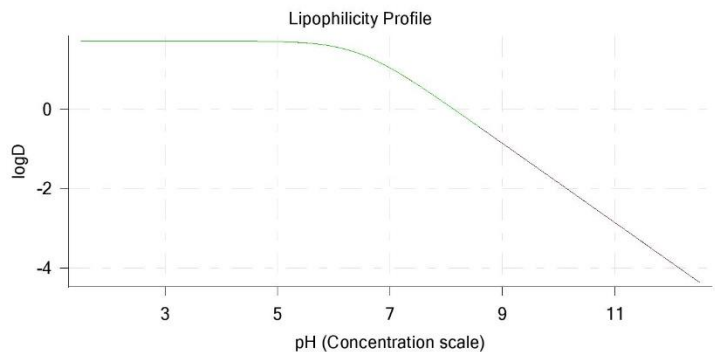

**Experimental Details on PAMPA Analysis:** these determinations were carried out by Analiza Inc. (Cleveland, OH).

**Assay Summary:** Parallel Artificial Membrane Permeability Assay (PAMPA) using the Corning Gentest™ pre-coated PAMPA plate system with quantitation by HPLC-UV.

**Sample Preparation:** Upon arrival at Analiza samples will be prepared as DMSO stock solutions and sonicated in a 40°C water bath to facilitate dissolution.

**Assay Setup:** Dilutions (50-fold) of the DMSO stocks are prepared in PBS, 7.4 for a dose concentration of 200µM in a volume of 300µL directly in the Donor compartment of the Corning Gentest™ Pre-coated PAMPA plate. After preparation of the Donor plate, any precipitation is noted. The Acceptor compartment is filled with 1xPBS (200µL), pH 7.4. After careful assembly of the PAMPA plate, it is left to incubate for five hours in the dark at ambient temperature. A sister plate is created (50x dilution of 10mM test articles are prepared in 1xPBS, pH 7.4) directly in a Millipore solubility filter plate to measure the initial concentration of the sample in buffer (C0). Following incubation, the PAMPA plate is disassembled, and the samples are transferred from the Donor and Acceptor plates to 96-well plates for analysis. The C0 plate is filtered prior to analysis.

1. HPLC-UV: a. The filtrates are injected onto an AQUASIL C18, 50x2.1mM column and eluted using a fast generic gradient program.
  - a. A standard calibration curve (STD) is prepared for each compound. The DMSO stock is diluted in DMSO (or other suitable solvent) spanning the concentration range of the assay and instrument
  - b. The filtrates are quantified with respect to this calibration curve.
  - c. A comments field will contain notes pertinent to the assay of each compound.
  - d. Chromatograms are reported for each compound

**Calculation of Results:** The concentration values from the Donor and Acceptor compartment are used in the calculation of the effective permeability (Pe) of the compound. A mass balance equation is used to calculate the amount of compound retained in the membrane (%R). A high %R indicates either that the compound is bound to the PAMPA membrane, or that the compound is precipitating in the donor compartment. The equations for permeability and membrane retention are shown below. Note that we experimentally determine Co, instead of assuming the full solubility of the compound. Pe values less than 1.5E-6 cm/s correlate with human fraction absorbed (%FA) less than 80%, a generally accepted cutoff for low permeability.

PAMPA Effective Permeability

Membrane Retention (R)

$$P_e = \frac{-\ln \left(1 - \frac{C_A(t)}{C_{eq}}\right)}{A \cdot \left(\frac{1}{V_D} + \frac{1}{V_A}\right) \cdot t}$$

$$R = 1 - (C_D(t) * V_D + C_A(t) * V_A) / (C_0 * V_D)$$

CA(t) = compound concentration in acceptor well at time t (mM)

CD(t) = compound concentration in donor well at time t (mM)

C0 = initial compound concentration in donor well (mM)

VD = donor well volume = 0.3mL

VA = acceptor well volume = 0.2mL

A = filter area = 0.3cm<sup>2</sup>

t = incubation time = 5hr = 18000s

Ceq = compound concentration at equilibrium

$$= (C_D(t) * V_D + C_A(t) * V_A) / (V_D * V_A)$$

**Experimental Details on Shake-Flask logD determination:** these determinations were carried out by Analiza Inc. (Cleveland, OH).

**Assay Summary:** Analiza measures LogD directly, using its thermodynamic definition: the partition coefficient in buffer-octanol system in equilibrium using a novel, automated and miniaturized version of the gold standard shake-flask method.

**Partitioning:** For octanol/buffer partitioning, Analiza's standard two phase system plates will be used. Octanol in equilibrium with 1X-PBS, 7.4 is used to prepare partitioning plates for the assay. DMSO stock solutions will be added to each partitioning plate to a final concentration of 10% DMSO. The plates are sealed, vortexed on our specially designed deepwell plate mixer, and centrifuged to aid in phase settling. The assay will be conducted on the ADW workstation using chemiluminescent nitrogen detection.

**Calculation of Results:** The equimolar nitrogen response of the detector is calibrated using standards which span the dynamic range of the instrument from 0.08 to 4500  $\mu\text{g/ml}$  nitrogen. Both the top and bottom phases are quantified with respect to this calibration curve and the logarithm of the ratio of the concentration in the top phase to the concentration in the bottom phase is calculated as LogD. In addition to reporting the directly observed LogD value, the observed LogD value will be adjusted to a corrected LogD\* based upon our previous work correlating LogD in the presence and absence of DMSO in the partitioning system.

The calculated LogD and LogD\* values are corrected for background nitrogen in the DMSO and octanol-buffer 2-phase systems. A comments field contains notes pertinent to the assay of each compound, such as solid residue in the source plate, or aggregation of compound in the two phase system.

**Quality:** Each sample submission includes a series of on-board performance indicating standards (with LogD values spanning the range of the assay) which are prepared and assayed in duplicate in each media. The LogD results for these standards are control charted and monitored.

### Graph

Sample Name: Cpd 9  
Application Name: Purification Analysis (Administration)  
Method Name: Analytical UV Only  
Configuration Name: UV Only Config  
Version: 18  
Data Instrument Name: Detector  
Data Channel Name: 159 Channel 1  
Notes:  
Injection Number: 20

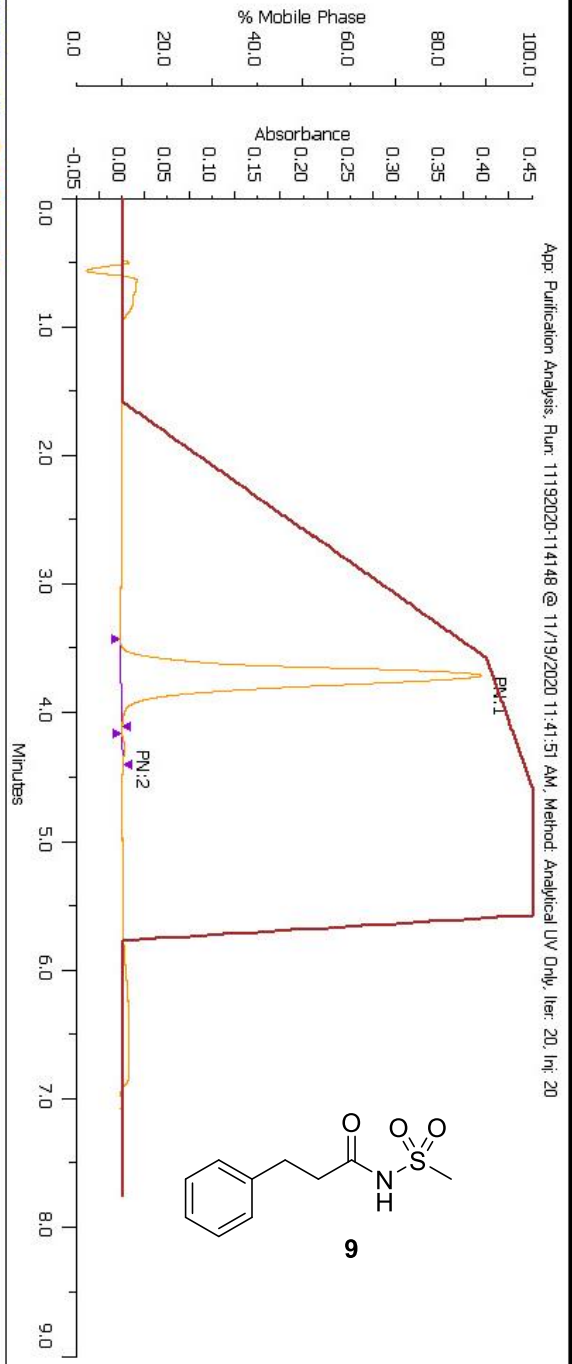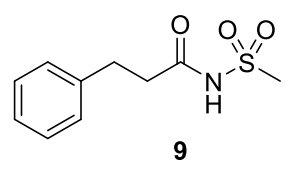

### Sample Table

| Retention Time (min) | Area (mAUmin x100) | Sample Name | Area % |
|----------------------|--------------------|-------------|--------|
| 3.715                | 6787.1778          | Cpd 9       | 99.536 |
| 4.284                | 31.6639            | Cpd 9       | 0.464  |

### Graph

Sample Name: Cpdl 10  
Application Name: Purification Analysis (Administration)  
Method Name: Analytical UV Only  
Configuration Name: UV Only Config  
Version: 18  
Data Instrument Name: Detector  
Data Channel Name: 159 Channel 1  
Notes:  
Injection Number: 16

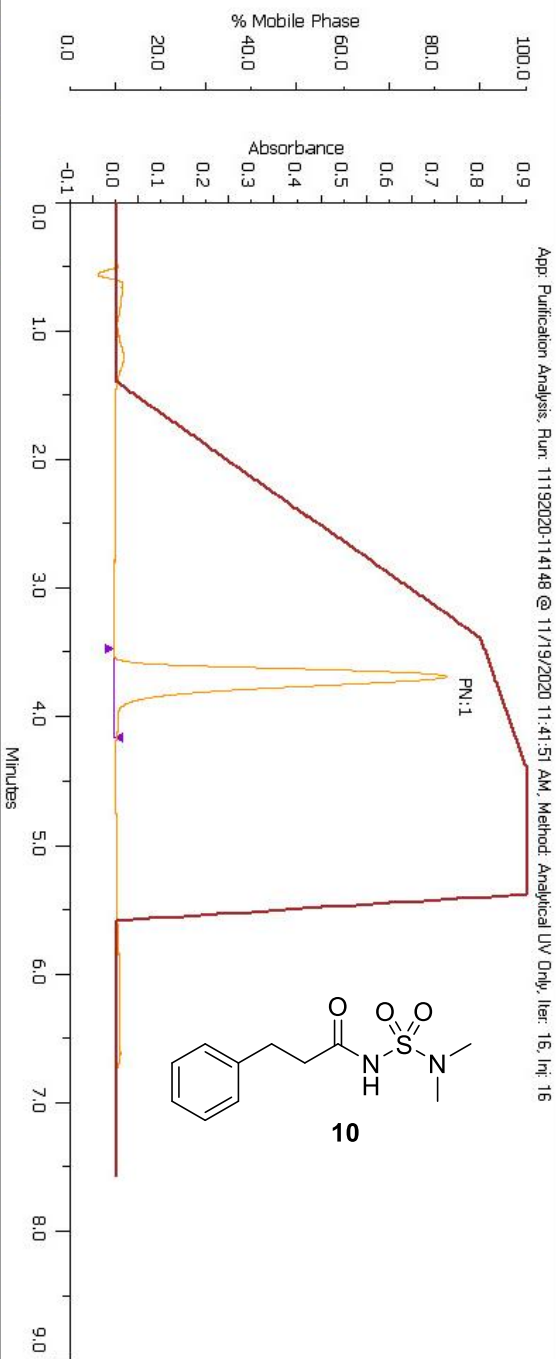

### Sample Table

| Retention Time (min) | Area (mAUmin x100) | Sample Name | Area % |  |  |  |  |  |  |
|----------------------|--------------------|-------------|--------|--|--|--|--|--|--|
| 3.691                | 11757.7444         | Cpdl 10     | 100    |  |  |  |  |  |  |

### Graph

Sample Name Cpd 11  
Application Name Purification Analysis (Administrator)  
Method Name Analytical UV/Only  
Configuration Name UV Only Config  
Version 18  
Data Instrument Name Detector  
Data Channel Name 159 Channel 1  
Notes  
Injection Number 13

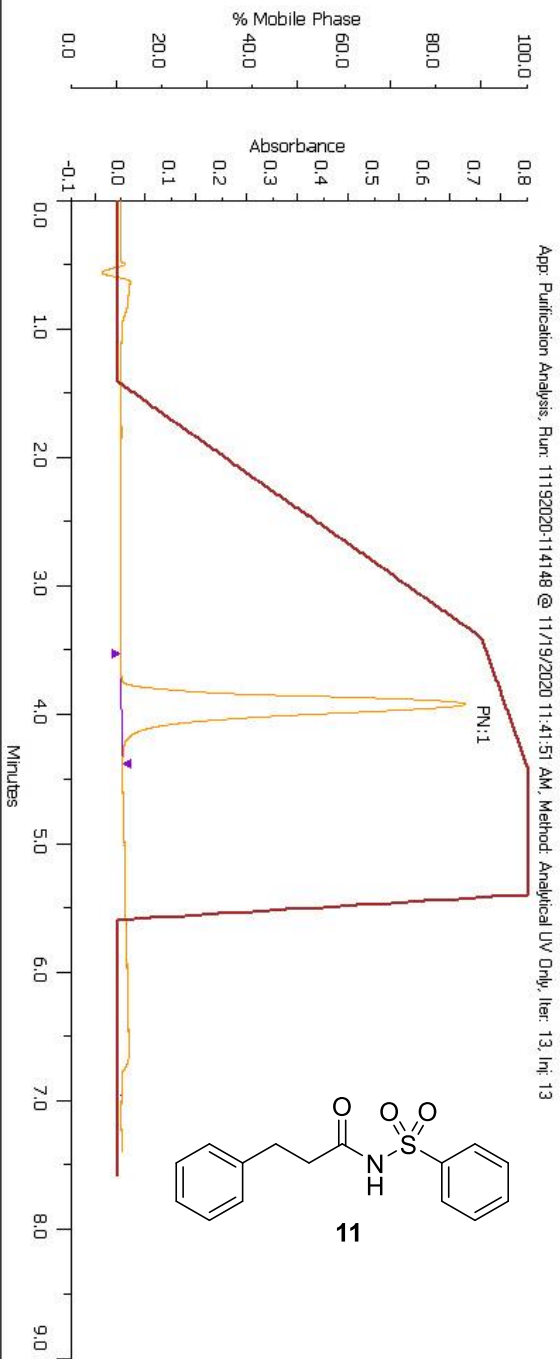

### Sample Table

| Retention Time (min) | Area (mAUmin x100) | Sample Name | Area % |  |  |  |  |  |  |
|----------------------|--------------------|-------------|--------|--|--|--|--|--|--|
| 3.92                 | 11454.6342         | Cpd 11      | 100    |  |  |  |  |  |  |



Chromatogram

Sample Name: Cpdl 14  
Application Name: Purification Analysis (Administrator)  
Method Name: Analytical UV Only  
Configuration Name: UV Only Config  
Version: 18  
Data Instrument Name: Detector  
Data Channel Name: 159 Channel 1  
Injection Number: 9

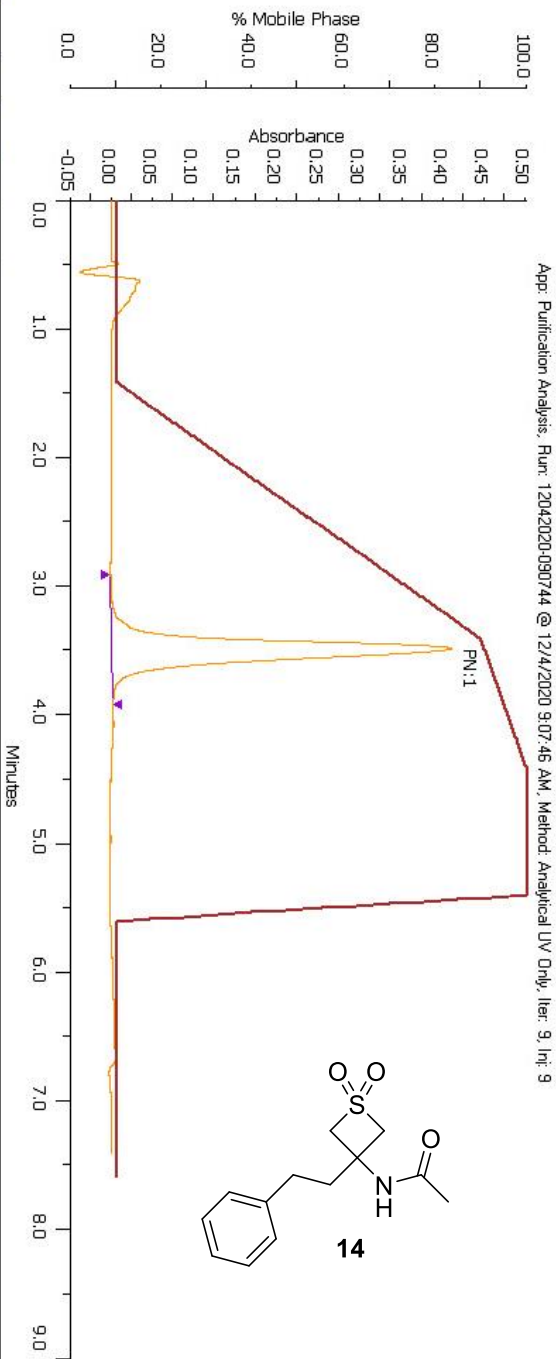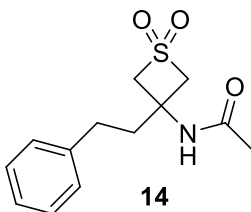

Sample Table

| Retention Time (min) | Area (mAUmin x100) | Sample Name | Area % |
|----------------------|--------------------|-------------|--------|
| 3.488                | 6947.7902          | Cpdl 14     | 100    |

### Graph

Sample Name: Cpd 15  
Application Name: Purification Analysis (Administration)  
Method Name: Analytical UV Only  
Configuration Name: UV Only Config  
Version: 18  
Data Instrument Name: Detector  
Data Channel Name: 159 Channel 1  
Notes:  
Injection Number: 8

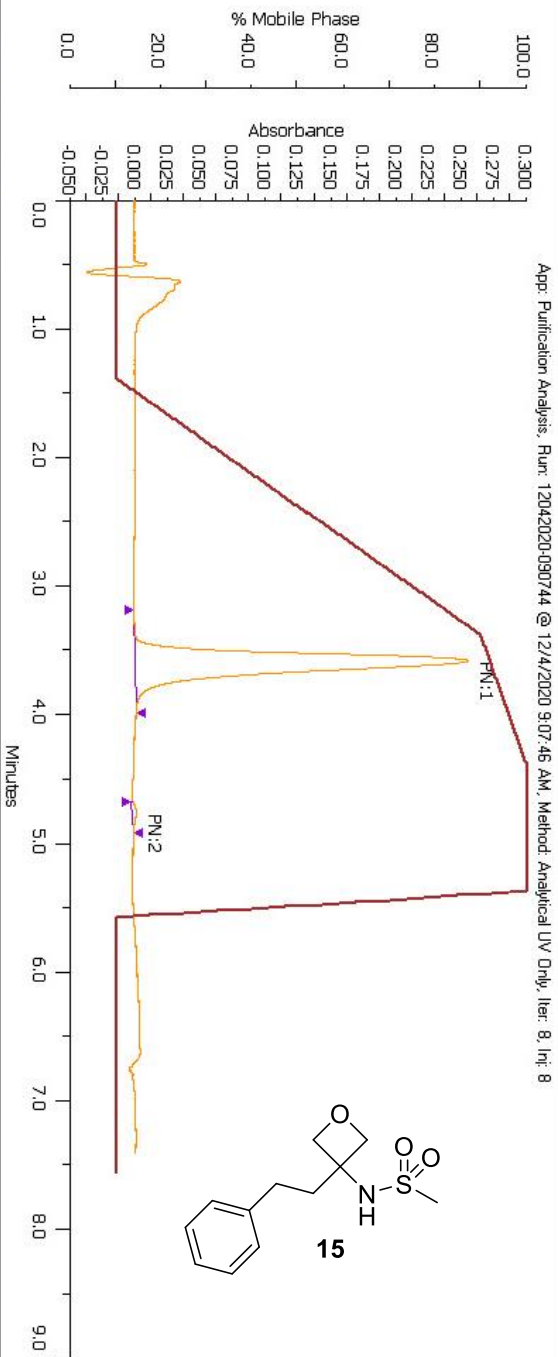

### Sample Table

| Retention Time (min) | Area (mAUmin x100) | Sample Name | Area % |
|----------------------|--------------------|-------------|--------|
| 3.583                | 4131.9665          | Cpd 15      | 98.944 |
| 4.76                 | 44.0801            | Cpd 15      | 1.056  |

### Graph

Sample Name Cpd 16  
Application Name Purification Analysis (Administrator)  
Method Name Analytical UV/Orfhy  
Configuration Name UV Only Config  
Version 18  
Data Instrument Name Detector  
Data Channel Name 159 Channel 1  
Notes  
Injection Number 8

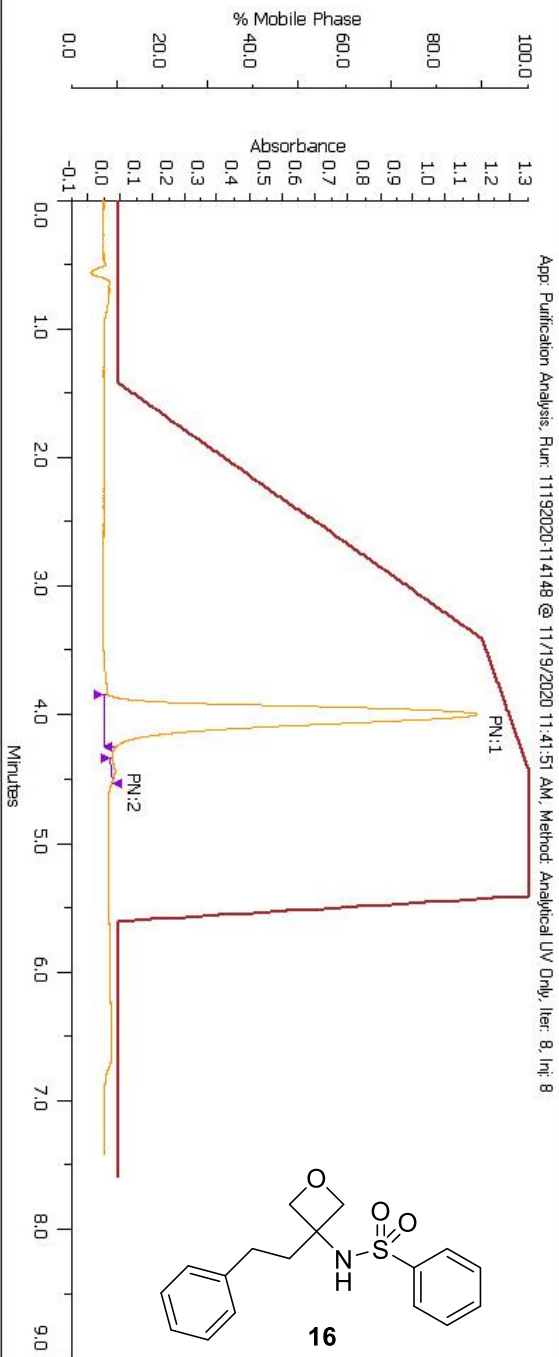

### Sample Table

| Retention Time (min) | Area (mAUmin x100) | Sample Name | Area % |  |  |  |  |  |  |
|----------------------|--------------------|-------------|--------|--|--|--|--|--|--|
| 4.001                | 19089.5696         | Cpd 16      | 99.124 |  |  |  |  |  |  |
| 4.434                | 168.612            | Cpd 16      | 0.876  |  |  |  |  |  |  |

**Chromatogram**

**Sample Name** Cpdl 18  
**Application Name** Purification Analysis (Administrator)  
**Method Name** Analytical UV Only  
**Configuration Name** UV Only Config  
**Version** 18  
**Data Instrument Name** Detector  
**Data Channel Name** 159 Channel 1  
**Notes**  
**Injection Number** 19

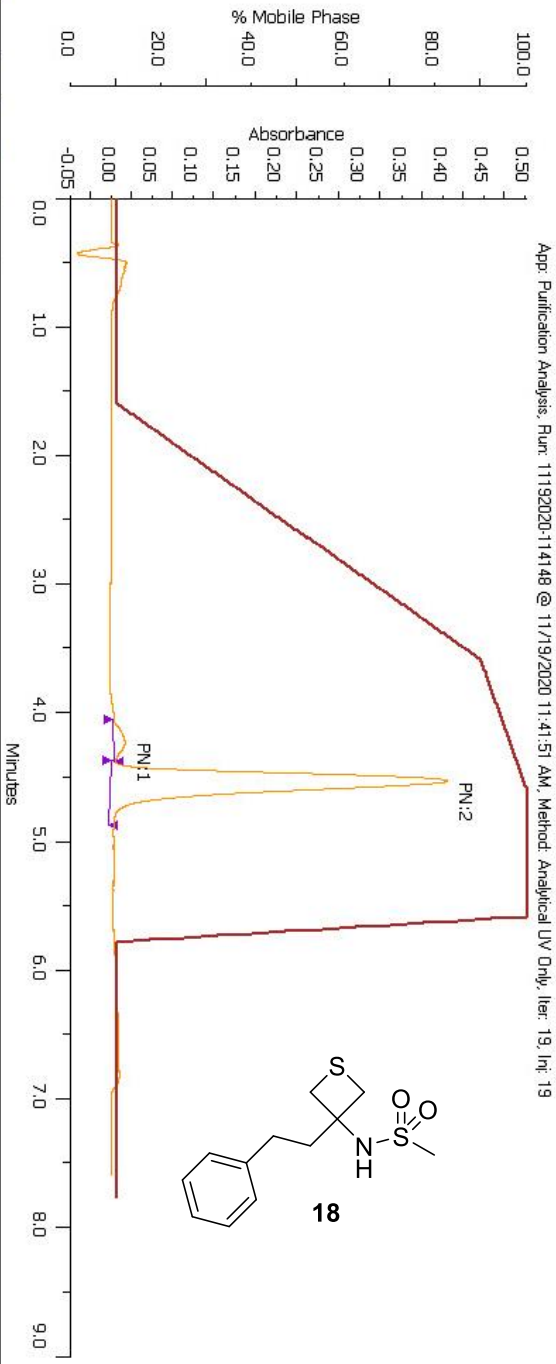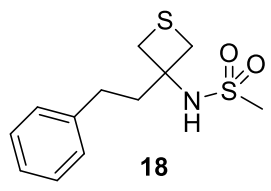

**Sample Table**

| Retention Time (min) | Area (mAUmin x100) | Sample Name | Area % |
|----------------------|--------------------|-------------|--------|
| 4.234                | 248.6748           | Cpdl 18     | 3.774  |
| 4.535                | 6341.2665          | Cpdl 18     | 96.226 |

**Cr aph**

Sample Name Cpd 22  
Application Name Purification Analysis (Administrator)  
Method Name Analytical UV Only  
Configuration Name UV Only Config  
Version 18  
Data Instrument Name Detector  
Data Channel Name 159 Channel 1  
Notes

Injection Number 6

App: Purification Analysis, Run: 12042020-090744 @ 12/4/2020 9:07:46 AM, Method: Analytical UV Only, Iter: 6, Inj: 6

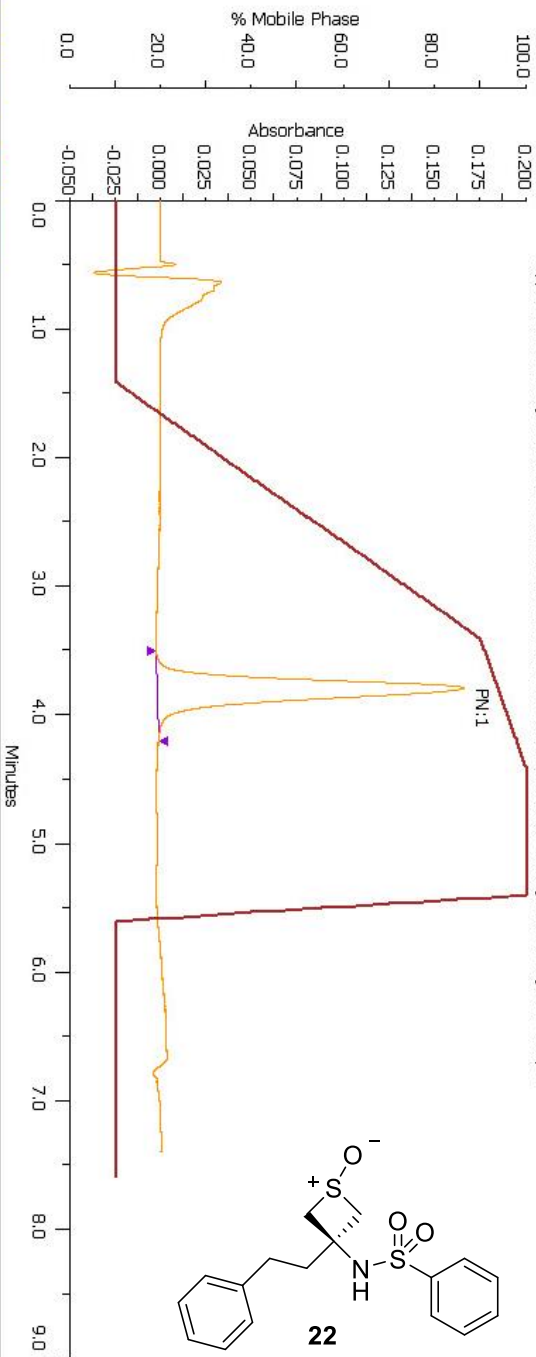

**Sample Table**

| Retention Time (min) | Area (mAUmin x100) | Sample Name | Area % |  |  |  |  |  |
|----------------------|--------------------|-------------|--------|--|--|--|--|--|
| 3.798                | 28464563           | Cpd 22      | 100    |  |  |  |  |  |

### Graph

Sample Name Cpd 27  
Application Name Purification Analysis (Administrator)  
Method Name Analytical UV Only  
Configuration Name UV Only Config  
Version 18  
Data Instrument Name Detector  
Data Channel Name 159 Channel 1  
Notes  
Injection Number 2

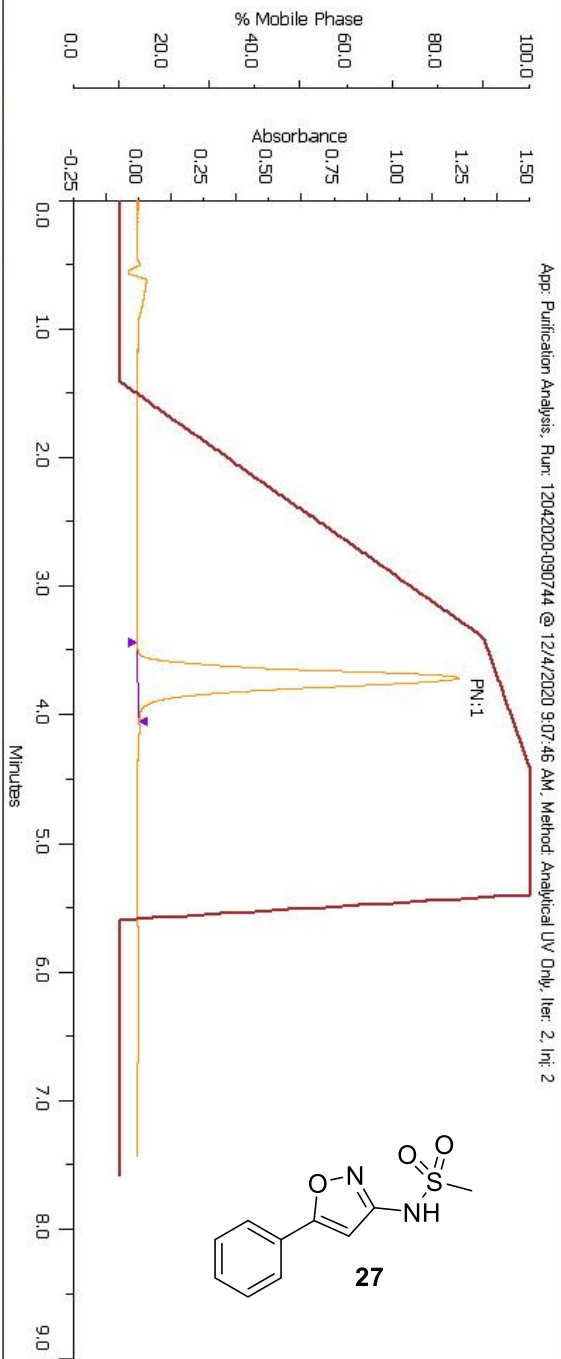

| Sample Table         |                    |             |        |
|----------------------|--------------------|-------------|--------|
| Retention Time (min) | Area (mAUmin x100) | Sample Name | Area % |
| 3.719                | 19871.9541         | Cpd 27      | 100    |

**Chromatogram**

Sample Name: Cpd 28  
Application Name: Purification Analysis (Administrator)  
Method Name: Analytical UV Only  
Configuration Name: UV Only Config  
Version: 18  
Data Instrument Name: Detector  
Data Channel Name: 159 Channel 1  
Notes:  
Injection Number: 3

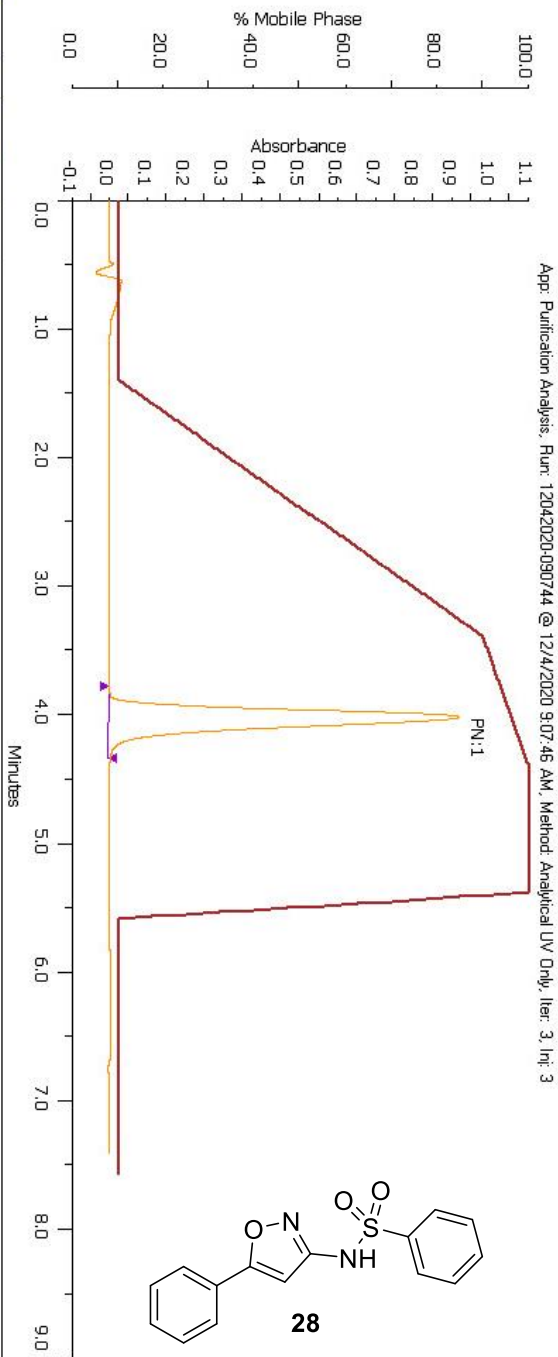

**Sample Table**

| Retention Time (min) | Area (mAU/min x100) | Sample Name | Area % |  |  |  |  |  |  |
|----------------------|---------------------|-------------|--------|--|--|--|--|--|--|
| 4.023                | 14366.6899          | Cpd 28      | 100    |  |  |  |  |  |  |

**Figure S4.** Comparison of lipophilicity (i.e.,  $\log D_{7.4}$ ), acidity (i.e.,  $pK_a$ ), and permeability (i.e.,  $\log P_{app}$ ) of test compounds vs other classes of carboxylic acid bioisosteres (crosses) from Lassalas, P. et. al. *J. Med. Chem.* **2016**, 59, 3183-3203.

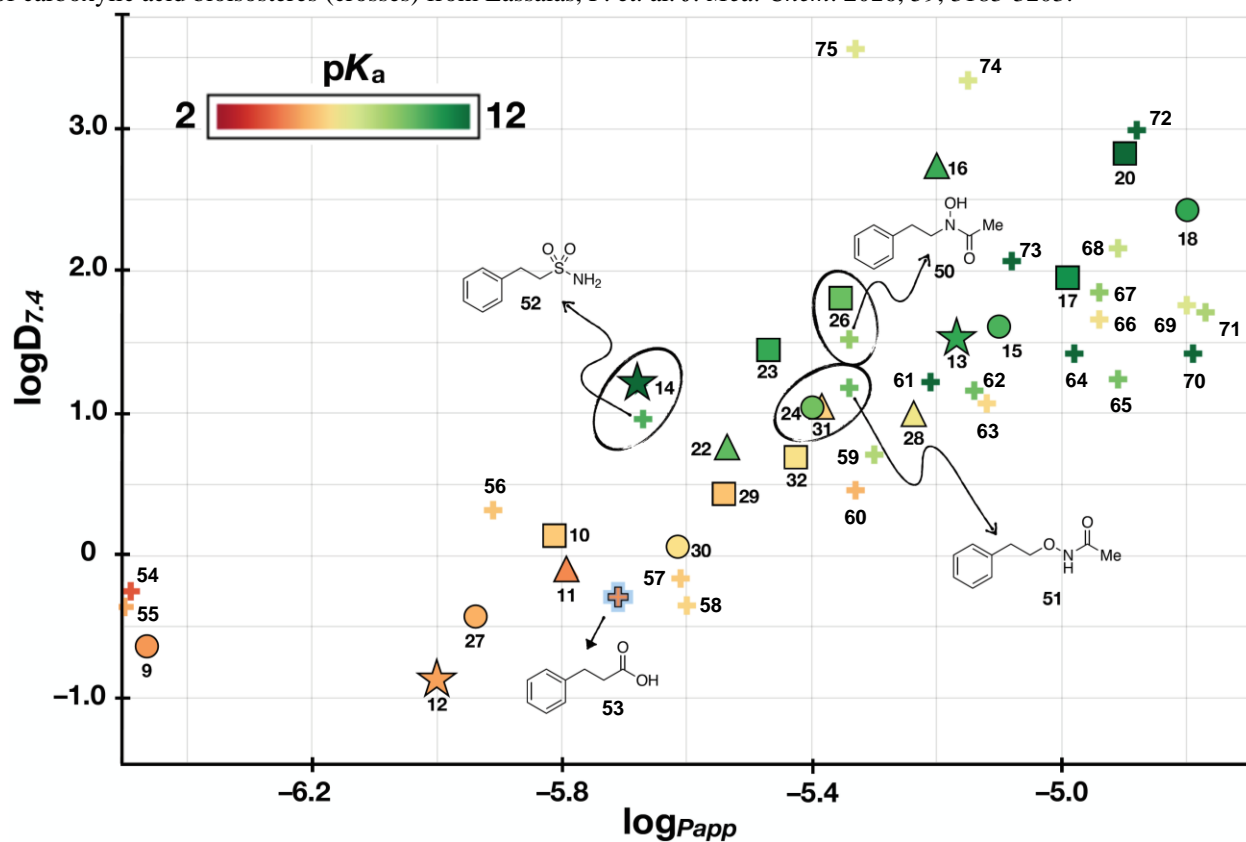

| Cpd ID | Structure |
|--------|-----------|--------|-----------|--------|-----------|--------|-----------|
| 50     |           | 57     |           | 64     |           | 71     |           |
| 51     |           | 58     |           | 65     |           | 72     |           |
| 52     |           | 59     |           | 66     |           | 73     |           |
| 53     |           | 60     |           | 67     |           | 74     |           |
| 54     |           | 61     |           | 68     |           | 75     |           |
| 55     |           | 62     |           | 69     |           |        |           |
| 56     |           | 63     |           | 70     |           |        |           |



## X-ray Structure Determination for BL-0650 (Cpd 15, CCDC 1998391)

### Experimental:

Crystals of BL-0650 (Cpd 15) were grown from dichloromethane/hexanes. The single crystal X-ray diffraction studies were carried out on a Bruker APEX-II CCD diffractometer equipped with with Mo  $K\alpha$  radiation ( $\lambda = 0.71073$ ). A  $0.20 \times 0.06 \times 0.04$  mm colorless block was mounted on a Cryoloop with Paratone oil. Data were collected in a nitrogen gas stream at 100(2) K using  $\phi$  and  $\omega$  scans. Crystal-to-detector distance was 60 mm with 5.00 s exposure time. A total of 5531 reflections were collected covering the indices  $-10 \leq h \leq 10$ ,  $-7 \leq k \leq 7$ ,  $-11 \leq l \leq 16$ . 2529 reflections were found to be symmetry independent, with a Rint of 0.0256. The space group was found to be P2<sub>1</sub>. Crystallographic data are summarized in Table 1.

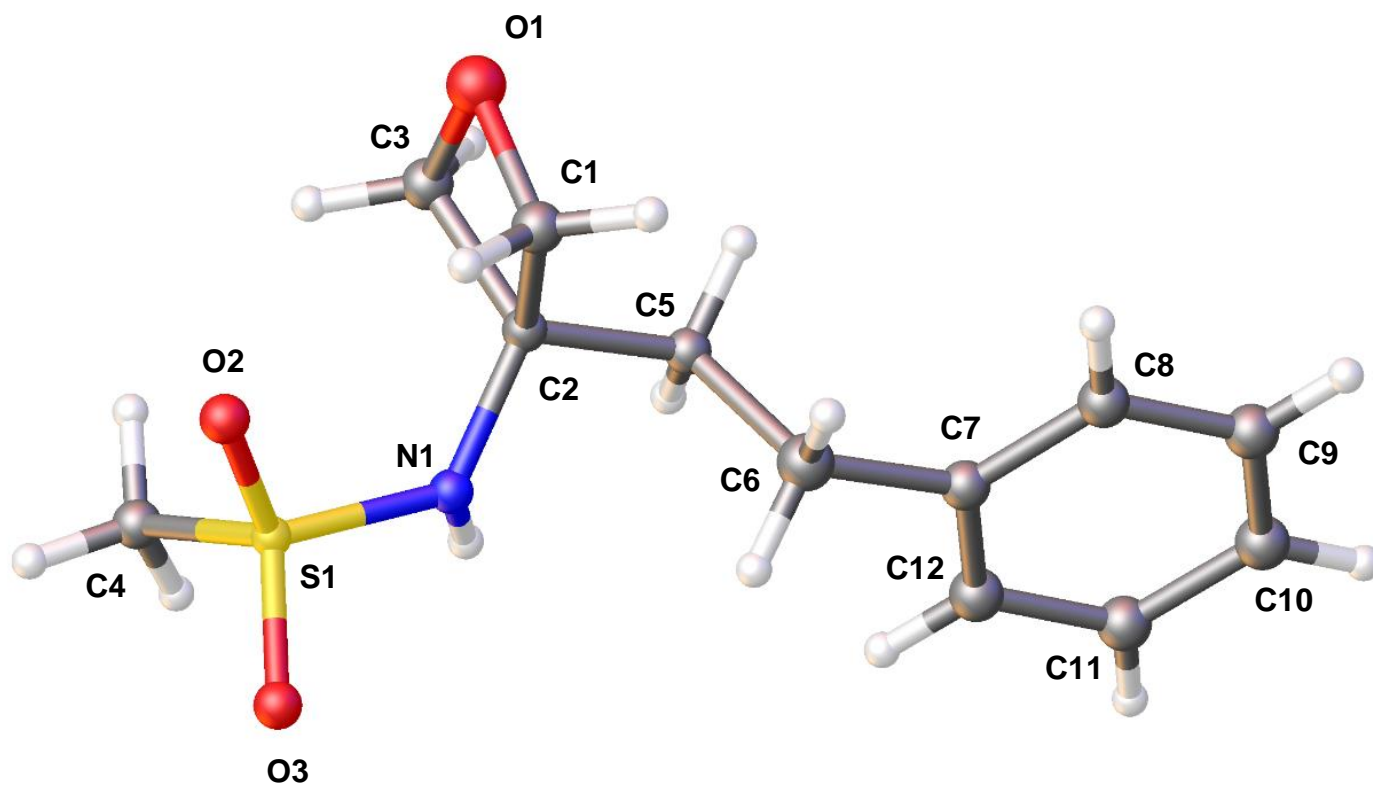

**Table 1 Crystal data and structure refinement for BL-0650 (Cpd 15)**

|                                             |                                                               |
|---------------------------------------------|---------------------------------------------------------------|
| Identification code                         | BL-0650                                                       |
| Empirical formula                           | C <sub>12</sub> H <sub>17</sub> NO <sub>3</sub> S             |
| Formula weight                              | 255.32                                                        |
| Temperature/K                               | 100.0                                                         |
| Crystal system                              | monoclinic                                                    |
| Space group                                 | P21                                                           |
| a/Å                                         | 8.0972(6)                                                     |
| b/Å                                         | 5.7922(5)                                                     |
| c/Å                                         | 13.2864(11)                                                   |
| α/°                                         | 90                                                            |
| β/°                                         | 95.043(3)                                                     |
| γ/°                                         | 90                                                            |
| Volume/Å <sup>3</sup>                       | 620.73(9)                                                     |
| Z                                           | 2                                                             |
| ρ <sub>calc</sub> /cm <sup>3</sup>          | 1.366                                                         |
| μ/mm <sup>-1</sup>                          | 0.257                                                         |
| F(000)                                      | 272.0                                                         |
| Crystal size/mm <sup>3</sup>                | 0.20 × 0.06 × 0.04                                            |
| Radiation                                   | MoKα (λ = 0.71073)                                            |
| 2θ range for data collection/°              | 3.078 to 52.784                                               |
| Index ranges                                | -10 ≤ h ≤ 10, -7 ≤ k ≤ 7, -11 ≤ l ≤ 16                        |
| Reflections collected                       | 5531                                                          |
| Independent reflections                     | 2529 [R <sub>int</sub> = 0.0256, R <sub>sigma</sub> = 0.0302] |
| Data/restraints/parameters                  | 2529/1/155                                                    |
| Goodness-of-fit on F <sup>2</sup>           | 1.046                                                         |
| Final R indexes [I ≥ 2σ (I)]                | R <sub>1</sub> = 0.0269, wR <sub>2</sub> = 0.0662             |
| Final R indexes [all data]                  | R <sub>1</sub> = 0.0283, wR <sub>2</sub> = 0.0673             |
| Largest diff. peak/hole / e Å <sup>-3</sup> | 0.32/-0.24                                                    |

**Table 2 Fractional Atomic Coordinates ( $\times 10^4$ ) and Equivalent Isotropic Displacement Parameters ( $\text{\AA}^2 \times 10^3$ ) for BL-0650 (Cpd 15)  $U_{eq}$  is defined as 1/3 of the trace of the orthogonalised  $U_{ij}$  tensor.**

| Atom | x          | y          | z          | U(eq)     |
|------|------------|------------|------------|-----------|
| S1   | 3055.3(6)  | 5772.7(10) | 5217.6(4)  | 12.36(13) |
| N1   | 3619(2)    | 5297(3)    | 4096.8(14) | 14.6(4)   |
| O2   | 1992(2)    | 7771(3)    | 5180.0(13) | 18.3(4)   |
| O3   | 4565.7(17) | 5847(4)    | 5884.2(11) | 17.2(3)   |
| O1   | 477(2)     | 7568(4)    | 2550.9(13) | 26.0(4)   |
| C2   | 2681(2)    | 5818(5)    | 3125.0(15) | 15.1(4)   |
| C4   | 1930(3)    | 3359(4)    | 5576.5(19) | 18.1(5)   |
| C7   | 6389(3)    | 4764(4)    | 1474.9(18) | 18.6(5)   |
| C6   | 5411(3)    | 5824(7)    | 2280.8(18) | 24.4(5)   |
| C5   | 3669(3)    | 4791(4)    | 2298.1(17) | 16.2(5)   |
| C1   | 2143(3)    | 8335(4)    | 2909.7(18) | 20.5(5)   |
| C8   | 6563(3)    | 5908(6)    | 571.2(17)  | 19.9(5)   |
| C10  | 8344(3)    | 2885(5)    | 41.8(19)   | 22.2(5)   |
| C12  | 7166(3)    | 2636(5)    | 1641.0(19) | 21.9(5)   |
| C11  | 8143(3)    | 1698(5)    | 931(2)     | 22.4(5)   |
| C9   | 7550(3)    | 4981(5)    | -136.2(18) | 22.4(5)   |
| C3   | 808(3)     | 5259(4)    | 2952.0(19) | 19.9(6)   |

**Table 3 Anisotropic Displacement Parameters ( $\text{\AA}^2 \times 10^3$ ) for BL-0650 (Cpd 15). The Anisotropic displacement factor exponent takes the form:  $-2\pi^2[h^2a^*2U_{11}+2hka^*b^*U_{12}+\dots]$ .**

| Atom | $U_{11}$ | $U_{22}$ | $U_{33}$ | $U_{23}$  | $U_{13}$ | $U_{12}$ |
|------|----------|----------|----------|-----------|----------|----------|
| S1   | 11.2(2)  | 11.7(2)  | 14.2(2)  | -0.4(2)   | 1.52(17) | -0.9(2)  |
| N1   | 15.1(9)  | 13.0(11) | 15.8(9)  | -1.0(7)   | 2.7(7)   | 3.3(7)   |
| O2   | 19.0(8)  | 16.5(9)  | 19.8(9)  | -1.0(7)   | 3.8(7)   | 3.9(7)   |
| O3   | 15.5(7)  | 18.5(7)  | 17.2(7)  | -1.6(9)   | -0.9(6)  | -3.0(9)  |
| O1   | 22.4(9)  | 31.6(10) | 23.5(9)  | 6.4(8)    | -1.0(7)  | 8.0(8)   |
| C2   | 15.8(9)  | 14.6(10) | 14.7(10) | 0.0(12)   | 1.2(8)   | -1.8(12) |
| C4   | 16.5(11) | 16.8(12) | 20.7(12) | 2.4(10)   | 0.7(10)  | -5.1(10) |
| C7   | 15.6(10) | 21.4(12) | 19.2(12) | -6.0(10)  | 3.6(9)   | -7.5(11) |
| C6   | 23.3(11) | 26.7(12) | 24.4(12) | -8.9(14)  | 9.5(9)   | -9.6(14) |
| C5   | 16.0(10) | 17.0(11) | 15.7(11) | -1.7(9)   | 1.5(8)   | -0.1(10) |
| C1   | 26.2(13) | 18.9(13) | 16.4(11) | 0.5(10)   | 1.1(10)  | 4.8(11)  |
| C8   | 19.1(10) | 18.4(11) | 22.1(11) | -0.6(12)  | 1.5(8)   | -0.4(12) |
| C10  | 16.3(11) | 29.5(15) | 21.4(12) | -10.9(11) | 5.1(9)   | -3.4(10) |
| C12  | 22.6(12) | 24.4(13) | 18.3(12) | 2.3(11)   | 0.4(10)  | -6.0(11) |
| C11  | 18.0(12) | 18.7(11) | 29.8(14) | -2.2(11)  | -1.1(10) | -0.8(9)  |
| C9   | 23.3(12) | 27.9(14) | 16.2(12) | 2.1(10)   | 3.4(9)   | -5.3(11) |
| C3   | 15.9(11) | 24.2(16) | 19.6(11) | -0.6(10)  | 1.3(9)   | 2.6(9)   |

**Table 4 Bond Lengths for BL-0650 (Cpd 15)**

| Atom | Atom | Length/ $\text{\AA}$ | Atom | Atom | Length/ $\text{\AA}$ |
|------|------|----------------------|------|------|----------------------|
| S1   | N1   | 1.6189(19)           | C2   | C3   | 1.549(3)             |
| S1   | O2   | 1.4407(18)           | C7   | C6   | 1.516(3)             |
| S1   | O3   | 1.4462(14)           | C7   | C8   | 1.389(4)             |
| S1   | C4   | 1.757(3)             | C7   | C12  | 1.393(4)             |
| N1   | C2   | 1.471(3)             | C6   | C5   | 1.534(3)             |
| O1   | C1   | 1.460(3)             | C8   | C9   | 1.394(3)             |
| O1   | C3   | 1.456(3)             | C10  | C11  | 1.390(4)             |
| C2   | C5   | 1.534(3)             | C10  | C9   | 1.384(4)             |
| C2   | C1   | 1.541(4)             | C12  | C11  | 1.393(4)             |

**Table 5 Bond Angles for BL-0650 (Cpd 15)**

| Atom | Atom | Atom | Angle/°    | Atom | Atom | Atom | Angle/°   |
|------|------|------|------------|------|------|------|-----------|
| N1   | S1   | C4   | 107.98(11) | C1   | C2   | C3   | 85.01(17) |
| O2   | S1   | N1   | 108.71(10) | C8   | C7   | C6   | 121.1(3)  |
| O2   | S1   | O3   | 117.91(11) | C8   | C7   | C12  | 118.7(2)  |
| O2   | S1   | C4   | 109.02(11) | C12  | C7   | C6   | 120.2(2)  |
| O3   | S1   | N1   | 106.07(9)  | C7   | C6   | C5   | 113.0(2)  |
| O3   | S1   | C4   | 106.74(12) | C2   | C5   | C6   | 113.4(2)  |
| C2   | N1   | S1   | 127.39(15) | O1   | C1   | C2   | 90.62(18) |
| C3   | O1   | C1   | 91.44(16)  | C7   | C8   | C9   | 120.5(3)  |
| N1   | C2   | C5   | 106.72(18) | C9   | C10  | C11  | 119.5(2)  |
| N1   | C2   | C1   | 118.2(2)   | C11  | C12  | C7   | 120.9(2)  |
| N1   | C2   | C3   | 120.70(19) | C10  | C11  | C12  | 119.9(2)  |
| C5   | C2   | C1   | 113.0(2)   | C10  | C9   | C8   | 120.5(2)  |
| C5   | C2   | C3   | 112.20(19) | O1   | C3   | C2   | 90.47(19) |

**Table 6 Hydrogen Atom Coordinates ( $\text{\AA} \times 10^4$ ) and Isotropic Displacement Parameters ( $\text{\AA}^2 \times 10^3$ ) for BL-0650 (Cpd 15)**

| Atom | x       | y       | z       | U(eq) |
|------|---------|---------|---------|-------|
| H1   | 3975.34 | 3863.72 | 4075.74 | 17    |
| H4a  | 899.58  | 3229.13 | 5135.07 | 27    |
| H4b  | 1668.27 | 3541.48 | 6278.29 | 27    |
| H4c  | 2596.22 | 1961.09 | 5516.36 | 27    |
| H6a  | 5312.85 | 7507.57 | 2161.5  | 29    |
| H6b  | 6027.9  | 5590.8  | 2949.96 | 29    |
| H5a  | 3046.2  | 5052.31 | 1632.69 | 19    |
| H5b  | 3767.89 | 3102.99 | 2402.35 | 19    |
| H1a  | 2175.38 | 9308.59 | 3523.53 | 25    |
| H1b  | 2743.21 | 9086.69 | 2380.57 | 25    |
| H8   | 6005.25 | 7331.04 | 434.43  | 24    |
| H10  | 9021.23 | 2264.15 | -440.46 | 27    |
| H12  | 7028.48 | 1812.38 | 2246.36 | 26    |
| H11  | 8670.29 | 247.78  | 1055.55 | 27    |
| H9   | 7678.68 | 5793.91 | -745.42 | 27    |
| H3a  | 547.52  | 4017.24 | 2450.88 | 24    |
| H3b  | 283.81  | 4946.04 | 3583.84 | 24    |

## X-ray Structure Determination for BL-0658 (Cpd 16, CCDC 1995771)

### Experimental:

Crystals of BL-0658 (Cpd 16) were grown from ethyl acetate. The single crystal X-ray diffraction studies were carried out on a Bruker APEX-II CCD diffractometer equipped with Cu K $\alpha$  radiation ( $\lambda = 1.54178$ ). A  $0.28 \times 0.03 \times 0.03$  mm colorless needle was mounted on a Cryoloop with Paratone oil. Data were collected in a nitrogen gas stream at 100(2) K using  $\phi$  and  $\omega$  scans. Crystal-to-detector distance was 40 mm with 5.00 s exposure time. A total of 9057 reflections were collected covering the indices  $-20 \leq h \leq 21$ ,  $-9 \leq k \leq 9$ ,  $-13 \leq l \leq 12$ . 2727 reflections were found to be symmetry independent, with a Rint of 0.0770. The space group was found to be  $P2_1/c$ . Crystallographic data are summarized in Table 1.

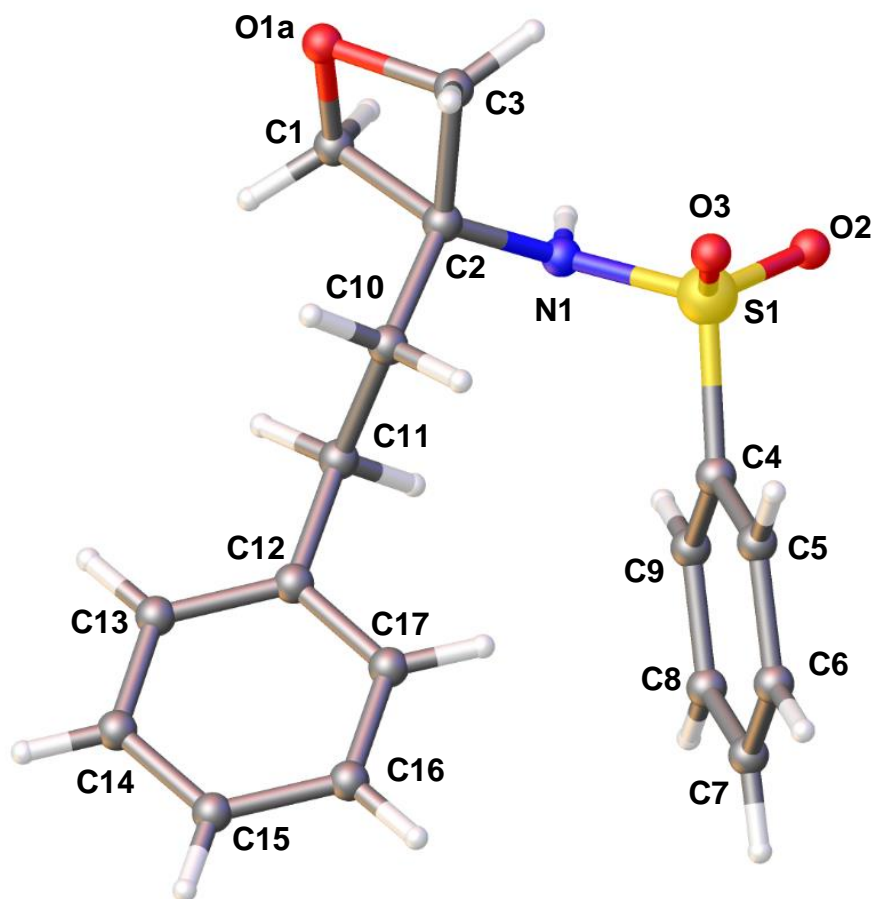

**Table 1 Crystal data and structure refinement for BL-0658 (Cpd 15, CCDC 1995771)**

|                                             |                                                               |
|---------------------------------------------|---------------------------------------------------------------|
| Identification code                         | BL-0658                                                       |
| Empirical formula                           | C <sub>17</sub> H <sub>19</sub> NO <sub>3</sub> S             |
| Formula weight                              | 317.41                                                        |
| Temperature/K                               | 100.0                                                         |
| Crystal system                              | monoclinic                                                    |
| Space group                                 | P21/c                                                         |
| a/Å                                         | 18.180(2)                                                     |
| b/Å                                         | 7.6435(12)                                                    |
| c/Å                                         | 11.3056(15)                                                   |
| α/°                                         | 90                                                            |
| β/°                                         | 96.444(9)                                                     |
| γ/°                                         | 90                                                            |
| Volume/Å <sup>3</sup>                       | 1561.1(4)                                                     |
| Z                                           | 4                                                             |
| ρ <sub>calc</sub> /cm <sup>3</sup>          | 1.3504                                                        |
| μ/mm <sup>-1</sup>                          | 1.947                                                         |
| F(000)                                      | 675.3                                                         |
| Crystal size/mm <sup>3</sup>                | 0.28 × 0.03 × 0.03                                            |
| Radiation                                   | Cu Kα (λ = 1.54178)                                           |
| 2θ range for data collection/°              | 4.9 to 133.16                                                 |
| Index ranges                                | -20 ≤ h ≤ 21, -9 ≤ k ≤ 9, -13 ≤ l ≤ 12                        |
| Reflections collected                       | 9057                                                          |
| Independent reflections                     | 2727 [R <sub>int</sub> = 0.0770, R <sub>sigma</sub> = 0.0822] |
| Data/restraints/parameters                  | 2727/0/213                                                    |
| Goodness-of-fit on F <sup>2</sup>           | 1.016                                                         |
| Final R indexes [I ≥ 2σ (I)]                | R <sub>1</sub> = 0.0632, wR <sub>2</sub> = 0.1566             |
| Final R indexes [all data]                  | R <sub>1</sub> = 0.1035, wR <sub>2</sub> = 0.1837             |
| Largest diff. peak/hole / e Å <sup>-3</sup> | 0.46/-0.58                                                    |

**Table 2 Fractional Atomic Coordinates ( $\times 10^4$ ) and Equivalent Isotropic Displacement Parameters ( $\text{\AA}^2 \times 10^3$ ) for BL-0658 (Cpd 15)  $U_{eq}$  is defined as 1/3 of the trace of the orthogonalised  $U_{ij}$  tensor.**

| Atom | x          | y          | z         | U(eq)    |
|------|------------|------------|-----------|----------|
| S1   | 3576.2(5)  | 6736.0(15) | 5299.9(8) | 39.9(3)  |
| O2   | 3998.4(17) | 8268(5)    | 5089(3)   | 54.4(8)  |
| O3   | 3534.4(17) | 5305(4)    | 4477(2)   | 52.1(8)  |
| C4   | 2656(2)    | 7464(5)    | 5378(3)   | 32.5(8)  |
| C9   | 2503(2)    | 8635(5)    | 6254(3)   | 39.1(9)  |
| C5   | 2110(2)    | 6938(5)    | 4506(3)   | 36.8(9)  |
| C12  | 1901(2)    | 3742(5)    | 7882(3)   | 34.6(8)  |
| C11  | 2683(2)    | 4384(6)    | 7914(3)   | 37.4(9)  |
| C13  | 1687(2)    | 2621(5)    | 8761(3)   | 38.1(9)  |
| C17  | 1376(2)    | 4229(5)    | 6965(3)   | 38.9(9)  |
| C10  | 3103(2)    | 3487(5)    | 6986(3)   | 34.1(8)  |
| C7   | 1242(2)    | 8762(6)    | 5379(4)   | 47.7(11) |
| C8   | 1791(3)    | 9275(6)    | 6253(4)   | 44.0(10) |
| C6   | 1394(2)    | 7599(6)    | 4505(3)   | 41.9(10) |
| C15  | 448(2)     | 2525(6)    | 7783(4)   | 41.9(9)  |
| C16  | 657(2)     | 3640(6)    | 6914(3)   | 42.6(10) |
| C14  | 965(2)     | 2040(6)    | 8704(3)   | 41.1(10) |
| N1   | 3872.5(19) | 6056(5)    | 6628(3)   | 38.8(8)  |
| O1a  | 4738(8)    | 2418(18)   | 7526(8)   | 46(3)    |
| C2   | 3878(2)    | 4205(5)    | 6950(3)   | 37.2(9)  |
| C1   | 4404(2)    | 3839(6)    | 8087(3)   | 41.2(10) |
| C3   | 4414(2)    | 3045(6)    | 6326(3)   | 45.6(11) |
| O1b  | 4999(11)   | 3200(40)   | 7337(9)   | 53(6)    |



**Table 3 Anisotropic Displacement Parameters ( $\text{\AA}^2 \times 10^3$ ) for BL-0658 (Cpd 15). The Anisotropic displacement factor exponent takes the form:  $-2\pi^2[h^2a^*2U_{11}+2hka^*b^*U_{12}+\dots]$ .**

| Atom | U11      | U22      | U33      | U12      | U13      | U23      |
|------|----------|----------|----------|----------|----------|----------|
| S1   | 35.4(5)  | 51.3(6)  | 34.2(5)  | -0.4(5)  | 9.0(4)   | 6.7(5)   |
| O2   | 39.9(16) | 68(2)    | 56.4(18) | -7.9(15) | 9.2(13)  | 23.0(17) |
| O3   | 54.5(18) | 69(2)    | 34.5(14) | 13.9(16) | 13.6(12) | 1.4(15)  |
| C4   | 33.5(19) | 32.6(19) | 32.8(18) | -4.6(16) | 10.1(15) | 6.4(16)  |
| C9   | 46(2)    | 39(2)    | 31.4(18) | -1.5(18) | 0.4(16)  | 2.4(17)  |
| C5   | 45(2)    | 38(2)    | 27.5(17) | -3.1(18) | 5.3(15)  | 4.6(17)  |
| C12  | 41(2)    | 33(2)    | 31.0(17) | -0.7(16) | 12.4(15) | -2.4(15) |
| C11  | 39(2)    | 44(2)    | 28.7(17) | -3.5(18) | 3.5(15)  | -6.2(17) |
| C13  | 47(2)    | 40(2)    | 27.8(17) | 0.1(18)  | 4.4(16)  | 5.0(17)  |
| C17  | 44(2)    | 41(2)    | 34.0(18) | 3.8(18)  | 12.6(16) | 9.0(17)  |
| C10  | 35.4(19) | 35(2)    | 31.8(18) | 0.1(16)  | 4.5(15)  | -2.0(16) |
| C7   | 43(2)    | 54(3)    | 46(2)    | 9(2)     | 7.5(18)  | 21(2)    |
| C8   | 54(3)    | 39(2)    | 39(2)    | 9(2)     | 11.3(18) | 0.7(18)  |
| C6   | 41(2)    | 49(2)    | 34.3(19) | -6.1(19) | -1.2(17) | 10.8(18) |
| C15  | 36(2)    | 51(2)    | 41(2)    | -2.1(19) | 11.8(16) | 3.8(19)  |
| C16  | 40(2)    | 54(3)    | 35.1(19) | 7.6(19)  | 7.2(16)  | 9.2(19)  |
| C14  | 44(2)    | 49(2)    | 32.8(18) | -4.8(19) | 16.2(16) | 7.9(18)  |
| N1   | 30.3(17) | 43(2)    | 41.0(18) | -4.0(16) | -2.7(14) | 1.8(16)  |
| O1a  | 37(5)    | 55(5)    | 46(3)    | 11(4)    | 6(3)     | 0(4)     |
| C2   | 37(2)    | 40(2)    | 35.2(19) | 2.6(18)  | 8.3(16)  | -3.6(17) |
| C1   | 48(2)    | 42(2)    | 33.9(19) | 4.5(19)  | 5.9(17)  | -7.4(17) |
| C3   | 45(2)    | 57(3)    | 35(2)    | 11(2)    | 4.1(17)  | -6.2(19) |
| O1b  | 42(7)    | 92(12)   | 26(4)    | 25(8)    | 5(4)     | -12(5)   |

**Table 4 Bond Lengths for BL-0658 (Cpd 15)**

| Atom | Atom | Length/Å | Atom | Atom | Length/Å  |
|------|------|----------|------|------|-----------|
| S1   | O2   | 1.434(3) | C17  | C16  | 1.377(6)  |
| S1   | O3   | 1.432(3) | C10  | C2   | 1.517(5)  |
| S1   | C4   | 1.775(4) | C7   | C8   | 1.381(6)  |
| S1   | N1   | 1.622(3) | C7   | C6   | 1.380(6)  |
| C4   | C9   | 1.386(5) | C15  | C16  | 1.386(6)  |
| C4   | C5   | 1.378(5) | C15  | C14  | 1.373(6)  |
| C9   | C8   | 1.384(6) | N1   | C2   | 1.461(5)  |
| C5   | C6   | 1.395(6) | O1a  | C1   | 1.426(8)  |
| C12  | C11  | 1.501(5) | O1a  | C3   | 1.496(10) |
| C12  | C13  | 1.400(5) | C2   | C1   | 1.539(5)  |
| C12  | C17  | 1.379(6) | C2   | C3   | 1.545(6)  |
| C11  | C10  | 1.528(5) | C1   | O1b  | 1.527(13) |
| C13  | C14  | 1.380(6) | C3   | O1b  | 1.476(12) |

**Table 5 Bond Angles for BL-0658 (Cpd 15)**

| Atom | Atom | Atom | Angle/°    | Atom | Atom | Atom | Angle/°  |
|------|------|------|------------|------|------|------|----------|
| O3   | S1   | O2   | 120.3(2)   | C2   | C10  | C11  | 113.2(3) |
| C4   | S1   | O2   | 106.10(19) | C6   | C7   | C8   | 120.5(4) |
| C4   | S1   | O3   | 106.87(18) | C7   | C8   | C9   | 120.2(4) |
| N1   | S1   | O2   | 106.67(19) | C7   | C6   | C5   | 119.7(4) |
| N1   | S1   | O3   | 110.16(19) | C14  | C15  | C16  | 119.0(4) |
| N1   | S1   | C4   | 105.75(18) | C15  | C16  | C17  | 120.4(4) |
| C9   | C4   | S1   | 120.2(3)   | C15  | C14  | C13  | 121.0(4) |
| C5   | C4   | S1   | 118.7(3)   | C2   | N1   | S1   | 122.3(3) |
| C5   | C4   | C9   | 120.9(4)   | C3   | O1a  | C1   | 90.9(5)  |
| C8   | C9   | C4   | 119.3(4)   | N1   | C2   | C10  | 112.1(3) |
| C6   | C5   | C4   | 119.4(4)   | C1   | C2   | C10  | 113.8(3) |
| C13  | C12  | C11  | 121.4(4)   | C1   | C2   | N1   | 111.8(3) |
| C17  | C12  | C11  | 120.3(4)   | C3   | C2   | C10  | 116.1(3) |
| C17  | C12  | C13  | 118.4(4)   | C3   | C2   | N1   | 115.4(3) |
| C10  | C11  | C12  | 112.4(3)   | C3   | C2   | C1   | 85.0(3)  |
| C14  | C13  | C12  | 120.1(4)   | C3   | O1b  | C1   | 87.8(8)  |
| C16  | C17  | C12  | 121.1(4)   |      |      |      |          |

**Table 6 Hydrogen Atom Coordinates ( $\text{\AA}\times 10^4$ ) and Isotropic Displacement Parameters ( $\text{\AA}^2\times 10^3$ ) for BL-0658 (Cpd 15)**

| Atom | x        | y        | z        | U(eq)    |
|------|----------|----------|----------|----------|
| H9   | 2884(2)  | 8995(5)  | 6850(3)  | 46.9(11) |
| H5   | 2219(2)  | 6131(5)  | 3911(3)  | 44.1(11) |
| H11a | 2678(2)  | 5662(6)  | 7772(3)  | 44.8(11) |
| H11b | 2946(2)  | 4170(6)  | 8716(3)  | 44.8(11) |
| H13  | 2039(2)  | 2260(5)  | 9398(3)  | 45.7(11) |
| H17  | 1512(2)  | 4984(5)  | 6359(3)  | 46.7(11) |
| H10a | 3136(2)  | 2219(5)  | 7162(3)  | 40.9(10) |
| H10b | 2821(2)  | 3631(5)  | 6191(3)  | 40.9(10) |
| H7   | 755(2)   | 9212(6)  | 5380(4)  | 57.2(13) |
| H8   | 1680(3)  | 10068(6) | 6855(4)  | 52.8(12) |
| H6   | 1014(2)  | 7251(6)  | 3906(3)  | 50.3(12) |
| H15  | -46(2)   | 2102(6)  | 7743(4)  | 50.2(11) |
| H16  | 303(2)   | 3999(6)  | 6279(3)  | 51.1(12) |
| H14  | 824(2)   | 1294(6)  | 9311(3)  | 49.3(12) |
| H1a  | 4145(2)  | 3475(6)  | 8771(3)  | 49.4(12) |
| H1d  | 4751(2)  | 4812(6)  | 8314(3)  | 49.4(12) |
| H1b  | 4548(2)  | 4903(6)  | 8557(3)  | 49.4(12) |
| H1c  | 4223(2)  | 2918(6)  | 8598(3)  | 49.4(12) |
| H3a  | 4765(2)  | 3713(6)  | 5892(3)  | 54.8(13) |
| H3d  | 4165(2)  | 2118(6)  | 5817(3)  | 54.8(13) |
| H3b  | 4233(2)  | 1832(6)  | 6187(3)  | 54.8(13) |
| H3c  | 4554(2)  | 3563(6)  | 5581(3)  | 54.8(13) |
| H1   | 4200(20) | 6590(50) | 6940(30) | 17(9)    |

**Table 7 Atomic Occupancy for BL-0658 (Cpd 15)**

| Atom | Occupancy | Atom | Occupancy |
|------|-----------|------|-----------|
| O1a  | 0.56(4)   | H1a  | 0.56(4)   |
| H1b  | 0.44(4)   | H1c  | 0.44(4)   |
| H3d  | 0.56(4)   | H3b  | 0.44(4)   |
| O1b  | 0.44(4)   |      |           |

## X-ray Structure Determination for BL-0667 (Cpd 18, CCDC 1995773)

### Experimental:

Crystals of BL-0667 (Cpd 18) were grown from ethyl acetate. The single crystal X-ray diffraction studies were carried out on a Bruker APEX-II CCD diffractometer equipped with Cu K $\alpha$  radiation ( $\lambda = 1.54178$ ). A  $0.230 \times 0.05 \times 0.05$  mm colorless rod was mounted on a Cryoloop with Paratone oil. Data were collected in a nitrogen gas stream at 100(2) K using  $\phi$  and  $\omega$  scans. Crystal-to-detector distance was 40 mm with 5.00 s exposure time. A total of 5101 reflections were collected covering the indices  $-9 \leq h \leq 9$ ,  $-6 \leq k \leq 6$ ,  $-16 \leq l \leq 16$ . 2275 reflections were found to be symmetry independent, with a Rint of 0.0334. The space group was found to be P2<sub>1</sub>. Crystallographic data are summarized in Table 1.

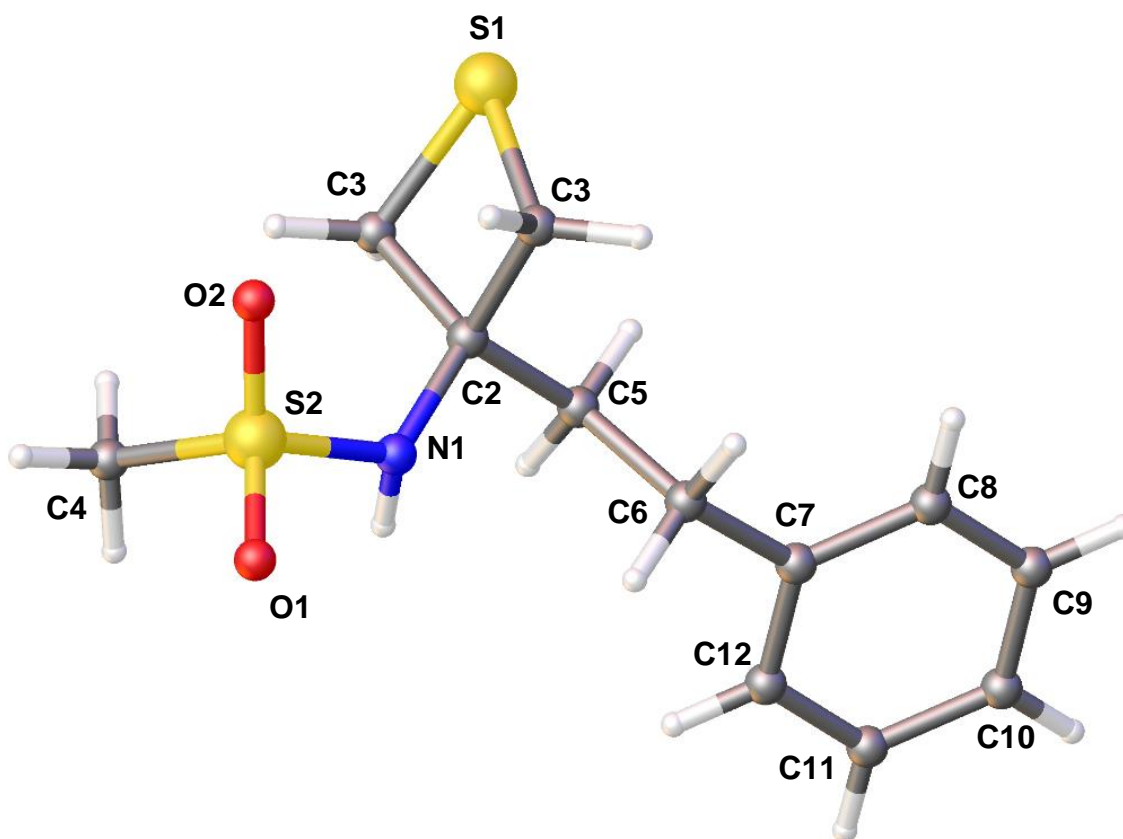

**Table 1 Crystal data and structure refinement for BL-0667 (Cpd 18)**

|                                             |                                                                |
|---------------------------------------------|----------------------------------------------------------------|
| Identification code                         | BL-0667                                                        |
| Empirical formula                           | C <sub>12</sub> H <sub>17</sub> NO <sub>2</sub> S <sub>2</sub> |
| Formula weight                              | 271.38                                                         |
| Temperature/K                               | 100.0                                                          |
| Crystal system                              | monoclinic                                                     |
| Space group                                 | P21                                                            |
| a/Å                                         | 8.1251(5)                                                      |
| b/Å                                         | 5.7879(4)                                                      |
| c/Å                                         | 13.8802(9)                                                     |
| α/°                                         | 90                                                             |
| β/°                                         | 95.521(4)                                                      |
| γ/°                                         | 90                                                             |
| Volume/Å <sup>3</sup>                       | 649.72(7)                                                      |
| Z                                           | 2                                                              |
| ρ <sub>calc</sub> /cm <sup>3</sup>          | 1.387                                                          |
| μ/mm <sup>-1</sup>                          | 3.636                                                          |
| F(000)                                      | 288.0                                                          |
| Crystal size/mm <sup>3</sup>                | 0.23 × 0.05 × 0.05                                             |
| Radiation                                   | CuKα (λ = 1.54178)                                             |
| 2θ range for data collection/°              | 6.398 to 139.872                                               |
| Index ranges                                | -9 ≤ h ≤ 9, -6 ≤ k ≤ 6, -16 ≤ l ≤ 16                           |
| Reflections collected                       | 5101                                                           |
| Independent reflections                     | 2275 [R <sub>int</sub> = 0.0334, R <sub>sigma</sub> = 0.0465]  |
| Data/restraints/parameters                  | 2275/1/155                                                     |
| Goodness-of-fit on F <sup>2</sup>           | 0.719                                                          |
| Final R indexes [I ≥ 2σ (I)]                | R <sub>1</sub> = 0.0316, wR <sub>2</sub> = 0.0827              |
| Final R indexes [all data]                  | R <sub>1</sub> = 0.0324, wR <sub>2</sub> = 0.0837              |
| Largest diff. peak/hole / e Å <sup>-3</sup> | 0.40/-0.27                                                     |

**Table 2 Fractional Atomic Coordinates ( $\times 10^4$ ) and Equivalent Isotropic Displacement Parameters ( $\text{\AA}^2 \times 10^3$ ) for BL-0667 (Cpd 18)  $U_{eq}$  is defined as 1/3 of the trace of the orthogonalised  $U_{ij}$  tensor.**

| Atom | x         | y          | z          | U(eq)     |
|------|-----------|------------|------------|-----------|
| S2   | 6968.4(7) | 5467.7(10) | 4864.8(4)  | 17.55(17) |
| S1   | 9880.4(9) | 7271.9(14) | 7622.6(5)  | 30.1(2)   |
| O2   | 8185(2)   | 7261(4)    | 4908.4(14) | 25.2(4)   |
| O1   | 5492(2)   | 5753(4)    | 4210.0(13) | 24.8(4)   |
| N1   | 6356(3)   | 5140(4)    | 5937.2(15) | 19.9(5)   |
| C4   | 7864(3)   | 2847(5)    | 4554.6(19) | 22.0(5)   |
| C2   | 7357(3)   | 5594(6)    | 6860.1(18) | 20.8(5)   |
| C1   | 7840(4)   | 8141(5)    | 7047(2)    | 27.3(6)   |
| C7   | 3702(4)   | 4787(6)    | 8491(2)    | 26.1(6)   |
| C8   | 3622(4)   | 6049(6)    | 9339(2)    | 31.1(7)   |
| C12  | 2879(4)   | 2693(6)    | 8397(2)    | 29.7(7)   |
| C10  | 1861(4)   | 3184(7)    | 9950(2)    | 32.7(7)   |
| C6   | 4626(4)   | 5683(8)    | 7672(2)    | 39.9(8)   |
| C11  | 1961(4)   | 1890(6)    | 9119(2)    | 33.2(7)   |
| C5   | 6359(4)   | 4652(5)    | 7662(2)    | 24.0(6)   |
| C9   | 2698(4)   | 5246(7)    | 10053(2)   | 33.9(7)   |
| C3   | 9148(3)   | 4626(6)    | 6989.8(19) | 24.4(6)   |

**Table 3 Anisotropic Displacement Parameters ( $\text{\AA}^2 \times 10^3$ ) for BL-0667 (Cpd 18). The Anisotropic displacement factor exponent takes the form:  $-\pi^2[h^2a^*2U_{11}+2hka^*b^*U_{12}+\dots]$ .**

| Atom | $U_{11}$ | $U_{22}$ | $U_{33}$ | $U_{23}$ | $U_{13}$ | $U_{12}$ |
|------|----------|----------|----------|----------|----------|----------|
| S2   | 17.4(3)  | 15.5(3)  | 19.7(3)  | 0.7(2)   | 1.86(19) | 1.6(2)   |
| S1   | 29.9(4)  | 37.9(5)  | 22.3(3)  | -6.8(3)  | 1.4(2)   | -9.1(3)  |
| O2   | 27.6(10) | 23.0(11) | 25.3(9)  | 2.1(8)   | 4.9(7)   | -2.4(8)  |
| O1   | 23.1(9)  | 25.8(11) | 24.4(8)  | 1.2(8)   | -2.6(7)  | 4.5(8)   |
| N1   | 20.9(10) | 17.2(13) | 21.7(10) | 0.0(8)   | 2.6(8)   | -2.5(8)  |
| C4   | 20.5(12) | 20.9(14) | 24.3(12) | -3.9(10) | 1.5(9)   | 4.1(10)  |
| C2   | 23.6(13) | 16.8(13) | 21.5(11) | 0.3(11)  | 0.0(9)   | 1.5(12)  |
| C1   | 35.6(16) | 22.1(15) | 24.1(13) | -3.3(10) | 2.7(11)  | -3.8(12) |
| C7   | 24.1(14) | 28.5(16) | 26.0(13) | 7.9(11)  | 4.1(10)  | 9.1(11)  |
| C8   | 29.6(15) | 23.5(17) | 39.7(16) | -3.1(12) | 0.7(12)  | 0.1(11)  |
| C12  | 34.3(16) | 29.0(18) | 25.2(12) | -4.8(12) | 0.3(11)  | 5.6(13)  |
| C10  | 28.7(16) | 41(2)    | 29.0(14) | 12.3(13) | 7.8(12)  | 4.4(12)  |
| C6   | 35.9(17) | 44(2)    | 42.2(17) | 21.8(17) | 16.7(13) | 15.9(16) |
| C11  | 29.2(15) | 26.6(17) | 42.7(17) | 3.8(14)  | -1.5(12) | -4.0(13) |
| C5   | 26.9(14) | 22.1(14) | 23.2(12) | 4.2(10)  | 3.2(10)  | 2.8(11)  |
| C9   | 38.2(16) | 41(2)    | 22.7(12) | -4.0(13) | 2.0(11)  | 11.1(16) |
| C3   | 23.6(14) | 25.6(14) | 23.5(12) | -1.5(11) | -0.6(10) | 0.4(11)  |

**Table 4 Bond Lengths for BL-0667 (Cpd 18)**

| Atom | Atom | Length/ $\text{\AA}$ | Atom | Atom | Length/ $\text{\AA}$ |
|------|------|----------------------|------|------|----------------------|
| S2   | O2   | 1.431(2)             | C2   | C3   | 1.554(4)             |
| S2   | O1   | 1.4432(19)           | C7   | C8   | 1.392(5)             |
| S2   | N1   | 1.625(2)             | C7   | C12  | 1.385(5)             |
| S2   | C4   | 1.754(3)             | C7   | C6   | 1.513(4)             |
| S1   | C1   | 1.840(3)             | C8   | C9   | 1.381(5)             |
| S1   | C3   | 1.836(3)             | C12  | C11  | 1.385(5)             |
| N1   | C2   | 1.474(3)             | C10  | C11  | 1.384(5)             |
| C2   | C1   | 1.541(4)             | C10  | C9   | 1.374(6)             |
| C2   | C5   | 1.539(4)             | C6   | C5   | 1.531(4)             |

**Table 5 Bond Angles for BL-0667 (Cpd 18)**

| Atom | Atom | Atom | Angle/°    | Atom | Atom | Atom | Angle/°   |
|------|------|------|------------|------|------|------|-----------|
| O2   | S2   | O1   | 118.22(13) | C5   | C2   | C3   | 110.0(2)  |
| O2   | S2   | N1   | 108.49(12) | C2   | C1   | S1   | 90.89(18) |
| O2   | S2   | C4   | 109.66(13) | C8   | C7   | C6   | 121.5(3)  |
| O1   | S2   | N1   | 106.30(11) | C12  | C7   | C8   | 118.5(3)  |
| O1   | S2   | C4   | 106.49(13) | C12  | C7   | C6   | 120.0(3)  |
| N1   | S2   | C4   | 107.15(13) | C9   | C8   | C7   | 120.2(3)  |
| C3   | S1   | C1   | 77.49(13)  | C7   | C12  | C11  | 121.0(3)  |
| C2   | N1   | S2   | 125.66(18) | C9   | C10  | C11  | 119.3(3)  |
| N1   | C2   | C1   | 115.3(2)   | C7   | C6   | C5   | 113.3(3)  |
| N1   | C2   | C5   | 106.3(2)   | C10  | C11  | C12  | 120.0(3)  |
| N1   | C2   | C3   | 118.0(2)   | C6   | C5   | C2   | 114.7(2)  |
| C1   | C2   | C3   | 96.0(2)    | C10  | C9   | C8   | 121.0(3)  |
| C5   | C2   | C1   | 111.2(2)   | C2   | C3   | S1   | 90.64(19) |

**Table 6 Hydrogen Atom Coordinates ( $\text{\AA} \times 10^4$ ) and Isotropic Displacement Parameters ( $\text{\AA}^2 \times 10^3$ ) for BL-0667 (Cpd 18)**

| Atom | x       | y       | z        | U(eq) |
|------|---------|---------|----------|-------|
| H1   | 5890.16 | 3773.2  | 5969.21  | 24    |
| H4A  | 8186.19 | 2947.38 | 3893.44  | 33    |
| H4B  | 7061.99 | 1593.7  | 4592.77  | 33    |
| H4C  | 8843.94 | 2536.35 | 5004.29  | 33    |
| H1A  | 7146.52 | 8935.85 | 7492.86  | 33    |
| H1B  | 7896.2  | 9049.87 | 6446.36  | 33    |
| H8   | 4206.37 | 7466.98 | 9427.05  | 37    |
| H12  | 2943.93 | 1793.37 | 7829.93  | 36    |
| H10  | 1221.66 | 2651.63 | 10443.28 | 39    |
| H6A  | 4719.7  | 7384.57 | 7726.24  | 48    |
| H6B  | 3976.92 | 5326.85 | 7048.98  | 48    |
| H11  | 1399.88 | 452.22  | 9043.22  | 40    |
| H5A  | 6255.65 | 2956.29 | 7585.61  | 29    |
| H5B  | 6986.56 | 4954.35 | 8296.77  | 29    |
| H9   | 2638.46 | 6133.19 | 10624.98 | 41    |
| H3A  | 9633.98 | 4375.89 | 6370.81  | 29    |
| H3B  | 9265.43 | 3225.04 | 7400.08  | 29    |



## X-ray Structure Determination for BL-0657 (Cpd 19, CCDC 1995772)

### Experimental:

Crystals of BL-0657 (Cpd 19) were grown from dichloromethane/hexanes. The single crystal X-ray diffraction studies were carried out on a Bruker APEX-II CCD diffractometer equipped with with Mo K $\alpha$  radiation ( $\lambda = 0.71073$ ). A  $0.18 \times 0.05 \times 0.04$  mm colorless block was mounted on a Cryoloop with Paratone oil. Data were collected in a nitrogen gas stream at 100(2) K using  $\phi$  and  $\omega$  scans. Crystal-to-detector distance was 60 mm with 5.00 s exposure time. A total of 66842 reflections were collected covering the indices  $-16 \leq h \leq 16$ ,  $-18 \leq k \leq 18$ ,  $-23 \leq l \leq 23$ . 13392 reflections were found to be symmetry independent, with a Rint of 0.0434. The space group was found to be P-1. Crystallographic data are summarized in Table 1.

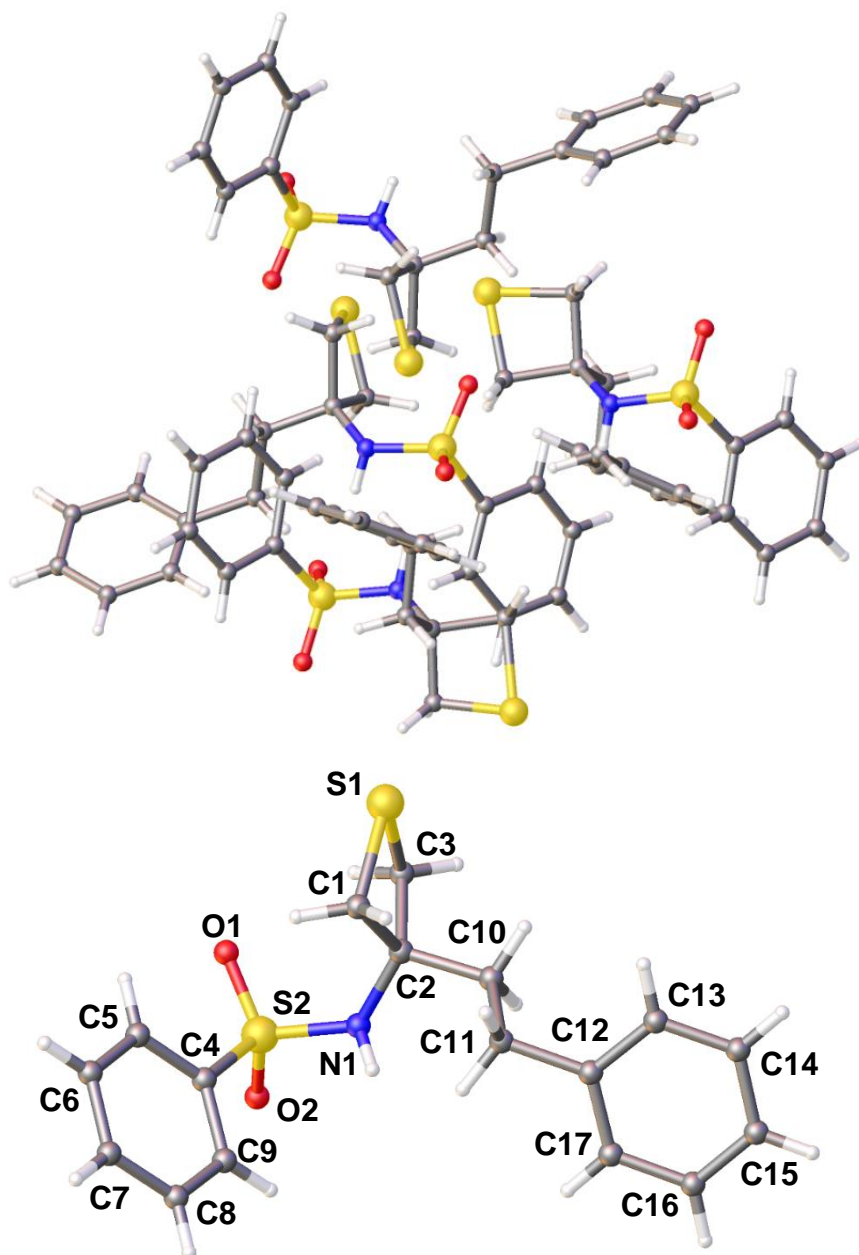

**Table 1 Crystal data and structure refinement for BL-0657 (Cpd 19)**

|                                             |                                                                |
|---------------------------------------------|----------------------------------------------------------------|
| Identification code                         | BL-0657                                                        |
| Empirical formula                           | C <sub>17</sub> H <sub>19</sub> NO <sub>2</sub> S <sub>2</sub> |
| Formula weight                              | 333.46                                                         |
| Temperature/K                               | 100.0                                                          |
| Crystal system                              | triclinic                                                      |
| Space group                                 | P-1                                                            |
| a/Å                                         | 13.0037(7)                                                     |
| b/Å                                         | 15.1406(11)                                                    |
| c/Å                                         | 18.8773(14)                                                    |
| α/°                                         | 100.792(2)                                                     |
| β/°                                         | 100.006(2)                                                     |
| γ/°                                         | 111.272(2)                                                     |
| Volume/Å <sup>3</sup>                       | 3281.4(4)                                                      |
| Z                                           | 8                                                              |
| ρ <sub>calc</sub> /cm <sup>3</sup>          | 1.347                                                          |
| μ/mm <sup>-1</sup>                          | 0.329                                                          |
| F(000)                                      | 1403.0                                                         |
| Crystal size/mm <sup>3</sup>                | 0.18 × 0.05 × 0.04                                             |
| Radiation                                   | MoKα (λ = 0.71073)                                             |
| 2θ range for data collection/°              | 3 to 52.734                                                    |
| Index ranges                                | -16 ≤ h ≤ 16, -18 ≤ k ≤ 18, -23 ≤ l ≤ 23                       |
| Reflections collected                       | 66842                                                          |
| Independent reflections                     | 13392 [R <sub>int</sub> = 0.0434, R <sub>sigma</sub> = 0.0370] |
| Data/restraints/parameters                  | 13392/0/355                                                    |
| Goodness-of-fit on F <sup>2</sup>           | 1.081                                                          |
| Final R indexes [I ≥ 2σ (I)]                | R <sub>1</sub> = 0.0878, wR <sub>2</sub> = 0.2143              |
| Final R indexes [all data]                  | R <sub>1</sub> = 0.1136, wR <sub>2</sub> = 0.2382              |
| Largest diff. peak/hole / e Å <sup>-3</sup> | 3.40/-2.43                                                     |

**Table 2 Fractional Atomic Coordinates ( $\times 10^4$ ) and Equivalent Isotropic Displacement Parameters ( $\text{\AA}^2 \times 10^3$ ) for BL-0657 (Cpd 19) Ueq is defined as 1/3 of of the trace of the orthogonalised UIJ tensor.**

| Atom | x           | y          | z          | U(eq)    |
|------|-------------|------------|------------|----------|
| S2D  | 1256.4(9)   | 5180.7(7)  | 1477.9(6)  | 15.5(2)  |
| S2A  | 1520.4(9)   | 2280.2(7)  | 992.7(6)   | 15.9(2)  |
| S2C  | -5563.6(9)  | 20.7(8)    | 3696.4(6)  | 17.2(2)  |
| S2B  | 4024.9(9)   | 2880.7(8)  | 4232.6(6)  | 16.7(2)  |
| S1B  | 548.9(10)   | 2771.3(9)  | 3533.6(7)  | 25.2(4)  |
| S1A  | 4953.5(11)  | 2228.5(9)  | 1383.7(7)  | 27.8(3)  |
| S1C  | -1432.5(13) | 1667.7(11) | 4802.0(8)  | 39.4(3)  |
| S1D  | -2869.4(13) | 3551.4(11) | 276.2(8)   | 37.4(5)  |
| O2A  | 750(3)      | 2593(2)    | 1330.2(17) | 20.0(6)  |
| O1D  | 2061(3)     | 4877(2)    | 1176.7(17) | 20.3(6)  |
| O1A  | 1712(3)     | 1456(2)    | 1153.4(17) | 22.1(7)  |
| O2D  | 976(3)      | 5932(2)    | 1247.1(17) | 21.6(7)  |
| O2C  | -6347(3)    | 334(2)     | 4017.6(17) | 20.3(6)  |
| O1B  | 3878(3)     | 3704(2)    | 4032.5(17) | 22.5(7)  |
| O1C  | -5275(3)    | -728(2)    | 3922.9(18) | 24.5(7)  |
| O2B  | 4958(3)     | 2652(2)    | 4070.0(18) | 24.8(7)  |
| N1D  | 91(3)       | 4196(3)    | 1259.1(19) | 16.3(7)  |
| N2A  | 2727(3)     | 3230(3)    | 1255.5(19) | 17.2(7)  |
| N1B  | 2882(3)     | 1900(3)    | 3801.5(19) | 16.4(7)  |
| N1C  | -4412(3)    | 1002(3)    | 3869.3(19) | 17.1(7)  |
| C2A  | 3881(4)     | 3242(3)    | 1345(2)    | 17.7(8)  |
| C4D  | 1837(4)     | 5591(3)    | 2460(2)    | 16.1(8)  |
| C2B  | 1701(4)     | 1831(3)    | 3646(2)    | 16.8(8)  |
| C12C | -3185(4)    | 743(3)     | 1793(2)    | 17.9(8)  |
| C12D | -1315(4)    | 4454(3)    | 3261(2)    | 17.6(8)  |
| C4A  | 948(4)      | 1992(3)    | 13(2)      | 16.7(8)  |
| C3B  | 1372(4)     | 2440(3)    | 4252(2)    | 18.2(9)  |
| C9B  | 4334(4)     | 2360(3)    | 5540(2)    | 20.2(9)  |
| C12A | 5383(4)     | 5893(3)    | 1151(2)    | 21.7(9)  |
| C4C  | -6201(4)    | -413(3)    | 2721(2)    | 17.8(8)  |
| C7D  | 2791(4)     | 6230(3)    | 3988(3)    | 22.2(9)  |
| C10D | -1223(4)    | 4600(3)    | 1964(2)    | 18.9(9)  |
| C5D  | 1966(4)     | 6514(3)    | 2853(2)    | 19.1(9)  |
| C4B  | 4209(4)     | 3077(3)    | 5209(2)    | 18.1(9)  |
| C9C  | -6375(4)    | -1350(3)   | 2330(2)    | 20.2(9)  |
| C2C  | -3265(4)    | 1028(3)    | 3884(2)    | 20.6(9)  |
| C5C  | -6552(4)    | 195(3)     | 2362(2)    | 21.1(9)  |
| C10C | -3166(4)    | 589(3)     | 3110(2)    | 20.3(9)  |
| C10A | 4710(4)     | 4318(3)    | 1524(2)    | 19.5(9)  |
| C17D | -472(4)     | 5152(3)    | 3879(3)    | 24.7(10) |
| C12B | 188(4)      | -849(3)    | 3807(2)    | 19.2(9)  |
| C5A  | 723(4)      | 1067(3)    | -427(3)    | 24.7(10) |
| C9D  | 2181(4)     | 4982(3)    | 2823(2)    | 21.1(9)  |

|      |          |          |          |          |
|------|----------|----------|----------|----------|
| C1A  | 4071(4)  | 2562(3)  | 702(2)   | 21.9(9)  |
| C2D  | -1067(4) | 4167(3)  | 1207(2)  | 20.0(9)  |
| C7C  | -7272(4) | -1089(3) | 1204(3)  | 24.6(10) |
| C8B  | 4522(4)  | 2539(3)  | 6312(3)  | 23.5(9)  |
| C6D  | 2450(4)  | 6832(3)  | 3623(3)  | 21.9(9)  |
| C11B | 973(4)   | 231(3)   | 4055(3)  | 22.2(9)  |
| C11D | -1007(4) | 4083(3)  | 2564(3)  | 22.8(9)  |
| C11C | -3401(4) | 1124(3)  | 2528(3)  | 23.6(9)  |
| C9A  | 668(4)   | 2672(3)  | -285(3)  | 22.5(9)  |
| C13D | -2443(4) | 4112(3)  | 3300(3)  | 24.6(10) |
| C5B  | 4275(4)  | 3962(3)  | 5633(2)  | 21.9(9)  |
| C17B | 521(4)   | -1547(3) | 3450(3)  | 23.8(10) |
| C13C | -2080(4) | 1036(4)  | 1713(3)  | 25.5(10) |
| C17C | -4089(4) | 94(4)    | 1186(3)  | 25.9(10) |
| C6C  | -7086(4) | -146(3)  | 1602(3)  | 23.2(9)  |
| C10B | 910(4)   | 733(3)   | 3423(2)  | 18.7(9)  |
| C3A  | 4228(4)  | 2783(3)  | 1966(3)  | 21.9(9)  |
| C11A | 4652(4)  | 4801(3)  | 884(3)   | 25.1(10) |
| C17A | 4887(4)  | 6567(4)  | 1228(3)  | 26.3(10) |
| C7B  | 4593(4)  | 3423(4)  | 6741(3)  | 27.0(10) |
| C8D  | 2656(4)  | 5305(3)  | 3589(3)  | 22.8(9)  |
| C7A  | -94(4)   | 1484(4)  | -1493(3) | 28.1(10) |
| C8A  | 142(4)   | 2410(4)  | -1044(3) | 25.9(10) |
| C1B  | 1415(4)  | 2307(3)  | 3027(3)  | 23.1(9)  |
| C8C  | -6923(4) | -1690(3) | 1567(3)  | 23.6(10) |
| C16D | -756(5)  | 5495(4)  | 4519(3)  | 31.2(11) |
| C14D | -2725(5) | 4448(4)  | 3940(3)  | 31.6(11) |
| C3C  | -2353(4) | 2094(4)  | 4233(3)  | 25.5(10) |
| C3D  | -1472(4) | 4609(4)  | 597(3)   | 26.1(10) |
| C6B  | 4465(4)  | 4124(4)  | 6404(3)  | 27.5(10) |
| C16B | -199(4)  | -2542(4) | 3243(3)  | 28.3(10) |
| C1C  | -2815(4) | 592(4)   | 4483(3)  | 26.9(10) |
| C13B | -881(4)  | -1170(4) | 3947(3)  | 28.3(10) |
| C6A  | 198(4)   | 818(4)   | -1189(3) | 29.9(11) |
| C14C | -1885(5) | 697(4)   | 1035(3)  | 32.7(11) |
| C1D  | -1968(4) | 3105(4)  | 835(3)   | 27.8(10) |
| C15D | -1876(4) | 5142(4)  | 4553(3)  | 30.7(11) |
| C16A | 5555(5)  | 7575(4)  | 1471(3)  | 33.0(11) |
| C15C | -2793(5) | 52(4)    | 433(3)   | 31.7(11) |
| C16C | -3899(5) | -258(4)  | 509(3)   | 33.3(11) |
| C14B | -1591(5) | -2166(4) | 3757(3)  | 35.3(12) |
| C15B | -1245(5) | -2857(4) | 3398(3)  | 35.3(12) |
| C13A | 6570(5)  | 6260(4)  | 1347(3)  | 38.2(13) |
| C15A | 6726(5)  | 7925(4)  | 1657(3)  | 36.8(12) |
| C14A | 7237(6)  | 7265(5)  | 1612(4)  | 50.7(16) |

**Table 3 Bond Lengths for BL-0657 (Cpd 19)**

| <b>Atom</b> | <b>Atom</b> | <b>Length/Å</b> | <b>Atom</b> | <b>Atom</b> | <b>Length/Å</b> |
|-------------|-------------|-----------------|-------------|-------------|-----------------|
| S2D         | O1D         | 1.445(3)        | C12A        | C13A        | 1.389(7)        |
| S2D         | O2D         | 1.431(3)        | C4C         | C9C         | 1.386(6)        |
| S2D         | N1D         | 1.614(4)        | C4C         | C5C         | 1.395(6)        |
| S2D         | C4D         | 1.770(4)        | C7D         | C6D         | 1.388(6)        |
| S2A         | O2A         | 1.444(3)        | C7D         | C8D         | 1.392(6)        |
| S2A         | O1A         | 1.432(3)        | C10D        | C2D         | 1.536(6)        |
| S2A         | N2A         | 1.613(4)        | C10D        | C11D        | 1.533(6)        |
| S2A         | C4A         | 1.774(4)        | C5D         | C6D         | 1.395(6)        |
| S2C         | O2C         | 1.445(3)        | C4B         | C5B         | 1.390(6)        |
| S2C         | O1C         | 1.430(3)        | C9C         | C8C         | 1.395(6)        |
| S2C         | N1C         | 1.610(4)        | C2C         | C10C        | 1.534(6)        |
| S2C         | C4C         | 1.770(4)        | C2C         | C3C         | 1.546(6)        |
| S2B         | O1B         | 1.435(3)        | C2C         | C1C         | 1.546(6)        |
| S2B         | O2B         | 1.443(3)        | C5C         | C6C         | 1.387(6)        |
| S2B         | N1B         | 1.613(4)        | C10C        | C11C        | 1.534(6)        |
| S2B         | C4B         | 1.770(4)        | C10A        | C11A        | 1.531(6)        |
| S1B         | C3B         | 1.837(4)        | C17D        | C16D        | 1.389(7)        |
| S1B         | C1B         | 1.836(5)        | C12B        | C11B        | 1.507(6)        |
| S1A         | C1A         | 1.838(5)        | C12B        | C17B        | 1.389(6)        |
| S1A         | C3A         | 1.843(5)        | C12B        | C13B        | 1.387(7)        |
| S1C         | C3C         | 1.838(5)        | C5A         | C6A         | 1.395(7)        |
| S1C         | C1C         | 1.838(5)        | C9D         | C8D         | 1.384(6)        |
| S1D         | C3D         | 1.838(5)        | C2D         | C3D         | 1.546(6)        |
| S1D         | C1D         | 1.832(5)        | C2D         | C1D         | 1.541(6)        |
| N1D         | C2D         | 1.475(5)        | C7C         | C6C         | 1.395(6)        |
| N2A         | C2A         | 1.473(5)        | C7C         | C8C         | 1.388(6)        |
| N1B         | C2B         | 1.473(5)        | C8B         | C7B         | 1.390(7)        |
| N1C         | C2C         | 1.472(6)        | C11B        | C10B        | 1.535(6)        |
| C2A         | C10A        | 1.524(6)        | C9A         | C8A         | 1.389(6)        |
| C2A         | C1A         | 1.555(6)        | C13D        | C14D        | 1.383(7)        |
| C2A         | C3A         | 1.552(6)        | C5B         | C6B         | 1.392(7)        |
| C4D         | C5D         | 1.388(6)        | C17B        | C16B        | 1.388(7)        |
| C4D         | C9D         | 1.397(6)        | C13C        | C14C        | 1.388(7)        |
| C2B         | C3B         | 1.551(6)        | C17C        | C16C        | 1.388(7)        |
| C2B         | C10B        | 1.531(6)        | C17A        | C16A        | 1.390(7)        |
| C2B         | C1B         | 1.544(6)        | C7B         | C6B         | 1.379(7)        |

|      |      |          |      |      |          |
|------|------|----------|------|------|----------|
| C12C | C11C | 1.513(6) | C7A  | C8A  | 1.390(7) |
| C12C | C13C | 1.387(6) | C7A  | C6A  | 1.381(7) |
| C12C | C17C | 1.389(6) | C16D | C15D | 1.375(7) |
| C12D | C17D | 1.390(6) | C14D | C15D | 1.387(7) |
| C12D | C11D | 1.510(6) | C16B | C15B | 1.373(7) |
| C12D | C13D | 1.387(6) | C13B | C14B | 1.389(7) |
| C4A  | C5A  | 1.385(6) | C14C | C15C | 1.386(7) |
| C4A  | C9A  | 1.389(6) | C16A | C15A | 1.371(8) |
| C9B  | C4B  | 1.394(6) | C15C | C16C | 1.384(7) |
| C9B  | C8B  | 1.393(6) | C14B | C15B | 1.391(8) |
| C12A | C11A | 1.507(6) | C13A | C14A | 1.387(9) |
| C12A | C17A | 1.391(7) | C15A | C14A | 1.385(9) |

**Table 4 Bond Angles for BL-0657 (Cpd 19)**

| Atom | Atom | Atom | Angle/°    | Atom | Atom | Atom | Angle/°  |
|------|------|------|------------|------|------|------|----------|
| O1D  | S2D  | N1D  | 105.44(18) | C5B  | C4B  | S2B  | 119.2(3) |
| O1D  | S2D  | C4D  | 105.78(19) | C5B  | C4B  | C9B  | 121.5(4) |
| O2D  | S2D  | O1D  | 119.66(19) | C4C  | C9C  | C8C  | 119.2(4) |
| O2D  | S2D  | N1D  | 107.90(19) | N1C  | C2C  | C10C | 112.8(4) |
| O2D  | S2D  | C4D  | 107.82(19) | N1C  | C2C  | C3C  | 109.8(4) |
| N1D  | S2D  | C4D  | 110.05(19) | N1C  | C2C  | C1C  | 114.0(4) |
| O2A  | S2A  | N2A  | 105.56(18) | C10C | C2C  | C3C  | 111.3(4) |
| O2A  | S2A  | C4A  | 105.71(19) | C10C | C2C  | C1C  | 111.9(4) |
| O1A  | S2A  | O2A  | 118.78(18) | C3C  | C2C  | C1C  | 95.9(4)  |
| O1A  | S2A  | N2A  | 108.74(19) | C6C  | C5C  | C4C  | 119.3(4) |
| O1A  | S2A  | C4A  | 108.03(19) | C11C | C10C | C2C  | 113.7(4) |
| N2A  | S2A  | C4A  | 109.80(19) | C2A  | C10A | C11A | 115.7(4) |
| O2C  | S2C  | N1C  | 105.72(18) | C16D | C17D | C12D | 120.5(5) |
| O2C  | S2C  | C4C  | 105.52(19) | C17B | C12B | C11B | 121.2(4) |
| O1C  | S2C  | O2C  | 119.50(19) | C13B | C12B | C11B | 120.4(4) |
| O1C  | S2C  | N1C  | 109.05(19) | C13B | C12B | C17B | 118.4(4) |
| O1C  | S2C  | C4C  | 107.5(2)   | C4A  | C5A  | C6A  | 118.7(4) |
| N1C  | S2C  | C4C  | 109.19(19) | C8D  | C9D  | C4D  | 119.2(4) |
| O1B  | S2B  | O2B  | 119.03(19) | C2A  | C1A  | S1A  | 90.7(3)  |
| O1B  | S2B  | N1B  | 108.39(19) | N1D  | C2D  | C10D | 113.0(4) |
| O1B  | S2B  | C4B  | 108.2(2)   | N1D  | C2D  | C3D  | 113.9(4) |
| O2B  | S2B  | N1B  | 105.41(19) | N1D  | C2D  | C1D  | 109.8(4) |
| O2B  | S2B  | C4B  | 106.3(2)   | C10D | C2D  | C3D  | 111.6(4) |
| N1B  | S2B  | C4B  | 109.24(19) | C10D | C2D  | C1D  | 111.7(4) |
| C1B  | S1B  | C3B  | 77.3(2)    | C1D  | C2D  | C3D  | 95.6(4)  |
| C1A  | S1A  | C3A  | 77.7(2)    | C8C  | C7C  | C6C  | 120.2(4) |

|      |      |      |          |      |      |      |          |
|------|------|------|----------|------|------|------|----------|
| C3C  | S1C  | C1C  | 77.3(2)  | C7B  | C8B  | C9B  | 120.2(4) |
| C1D  | S1D  | C3D  | 77.1(2)  | C7D  | C6D  | C5D  | 120.1(4) |
| C2D  | N1D  | S2D  | 125.6(3) | C12B | C11B | C10B | 112.5(4) |
| C2A  | N2A  | S2A  | 127.6(3) | C12D | C11D | C10D | 111.7(4) |
| C2B  | N1B  | S2B  | 126.2(3) | C12C | C11C | C10C | 112.7(4) |
| C2C  | N1C  | S2C  | 125.4(3) | C4A  | C9A  | C8A  | 118.7(4) |
| N2A  | C2A  | C10A | 106.5(3) | C14D | C13D | C12D | 120.9(5) |
| N2A  | C2A  | C1A  | 117.3(4) | C4B  | C5B  | C6B  | 118.7(4) |
| N2A  | C2A  | C3A  | 114.2(3) | C16B | C17B | C12B | 120.6(4) |
| C10A | C2A  | C1A  | 112.8(4) | C12C | C13C | C14C | 120.4(5) |
| C10A | C2A  | C3A  | 109.8(4) | C16C | C17C | C12C | 121.1(5) |
| C3A  | C2A  | C1A  | 96.1(3)  | C5C  | C6C  | C7C  | 120.1(4) |
| C5D  | C4D  | S2D  | 119.9(3) | C2B  | C10B | C11B | 114.4(4) |
| C5D  | C4D  | C9D  | 121.2(4) | C2A  | C3A  | S1A  | 90.6(3)  |
| C9D  | C4D  | S2D  | 118.9(3) | C12A | C11A | C10A | 111.2(4) |
| N1B  | C2B  | C3B  | 118.2(3) | C16A | C17A | C12A | 121.1(5) |
| N1B  | C2B  | C10B | 106.7(3) | C6B  | C7B  | C8B  | 120.3(5) |
| N1B  | C2B  | C1B  | 113.7(3) | C9D  | C8D  | C7D  | 120.1(4) |
| C10B | C2B  | C3B  | 111.9(3) | C6A  | C7A  | C8A  | 120.3(5) |
| C10B | C2B  | C1B  | 110.4(3) | C9A  | C8A  | C7A  | 120.2(5) |
| C1B  | C2B  | C3B  | 95.8(3)  | C2B  | C1B  | S1B  | 91.1(3)  |
| C13C | C12C | C11C | 120.5(4) | C7C  | C8C  | C9C  | 120.1(4) |
| C13C | C12C | C17C | 118.8(4) | C15D | C16D | C17D | 120.4(5) |
| C17C | C12C | C11C | 120.7(4) | C13D | C14D | C15D | 120.0(5) |
| C17D | C12D | C11D | 120.5(4) | C2C  | C3C  | S1C  | 91.2(3)  |
| C13D | C12D | C17D | 118.6(4) | C2D  | C3D  | S1D  | 90.5(3)  |
| C13D | C12D | C11D | 120.9(4) | C7B  | C6B  | C5B  | 120.6(5) |
| C5A  | C4A  | S2A  | 118.9(3) | C15B | C16B | C17B | 120.8(5) |
| C5A  | C4A  | C9A  | 121.8(4) | C2C  | C1C  | S1C  | 91.1(3)  |
| C9A  | C4A  | S2A  | 119.2(3) | C12B | C13B | C14B | 121.1(5) |
| C2B  | C3B  | S1B  | 90.9(3)  | C7A  | C6A  | C5A  | 120.2(5) |
| C8B  | C9B  | C4B  | 118.7(4) | C15C | C14C | C13C | 120.3(5) |
| C17A | C12A | C11A | 120.8(4) | C2D  | C1D  | S1D  | 90.9(3)  |
| C13A | C12A | C11A | 121.5(4) | C16D | C15D | C14D | 119.6(5) |
| C13A | C12A | C17A | 117.7(5) | C15A | C16A | C17A | 120.3(5) |
| C9C  | C4C  | S2C  | 120.3(3) | C16C | C15C | C14C | 119.8(5) |
| C9C  | C4C  | C5C  | 121.1(4) | C15C | C16C | C17C | 119.5(5) |
| C5C  | C4C  | S2C  | 118.5(3) | C13B | C14B | C15B | 119.8(5) |
| C6D  | C7D  | C8D  | 120.4(4) | C16B | C15B | C14B | 119.3(5) |
| C11D | C10D | C2D  | 114.1(4) | C14A | C13A | C12A | 121.2(6) |
| C4D  | C5D  | C6D  | 119.0(4) | C16A | C15A | C14A | 119.4(6) |
| C9B  | C4B  | S2B  | 119.3(3) | C15A | C14A | C13A | 120.2(6) |

**Table 5 Hydrogen Atom Coordinates ( $\text{\AA}\times 10^4$ ) and Isotropic Displacement Parameters ( $\text{\AA}^2\times 10^3$ ) for BL-0657 (Cpd 19)**

| Atom | x        | y        | z       | U(eq) |
|------|----------|----------|---------|-------|
| H1D  | 193.67   | 3808.2   | 1532.1  | 20    |
| H2A  | 2672.49  | 3633.82  | 985.93  | 21    |
| H1B  | 2904.63  | 1425.26  | 4001.72 | 20    |
| H1C  | -4541.24 | 1373.4   | 3589.05 | 21    |
| H3BA | 2035.94  | 3012.99  | 4603.32 | 22    |
| H3BB | 896.22   | 2037.92  | 4527.12 | 22    |
| H9B  | 4291.85  | 1760.18  | 5244.53 | 24    |
| H7D  | 3119.75  | 6449.42  | 4513.42 | 27    |
| H10A | -693.67  | 5305.2   | 2149.41 | 23    |
| H10B | -2013.18 | 4559.43  | 1888.37 | 23    |
| H5D  | 1729.12  | 6921.92  | 2599.89 | 23    |
| H9C  | -6125.11 | -1754.7  | 2579.18 | 24    |
| H5C  | -6426.01 | 835.91   | 2635.58 | 25    |
| H10E | -2385.9  | 611.31   | 3160.17 | 24    |
| H10F | -3713.3  | -111.24  | 2927.05 | 24    |
| H10C | 5498.63  | 4364.69  | 1688.51 | 23    |
| H10D | 4563.38  | 4700.67  | 1951.01 | 23    |
| H17D | 305.43   | 5395.75  | 3862.2  | 30    |
| H5A  | 921.48   | 611.11   | -214.01 | 30    |
| H9D  | 2090.51  | 4353.12  | 2548.08 | 25    |
| H1AA | 4496.65  | 2920.17  | 384.17  | 26    |
| H1AB | 3358.21  | 1997.83  | 391.67  | 26    |
| H7C  | -7639.35 | -1320.83 | 683.98  | 29    |
| H8B  | 4601.04  | 2056.38  | 6547.23 | 28    |
| H6D  | 2545.27  | 7462.22  | 3899.4  | 26    |
| H11G | 1769.45  | 307.22   | 4238.4  | 27    |
| H11H | 766.13   | 564.73   | 4475.26 | 27    |
| H11A | -1466.42 | 3364.68  | 2360.73 | 27    |
| H11B | -189.36  | 4197.78  | 2692.95 | 27    |
| H11E | -4207.36 | 1043.57  | 2437.44 | 28    |
| H11F | -2907.06 | 1836.55  | 2730.06 | 28    |
| H9A  | 831.69   | 3304.69  | 24.93   | 27    |
| H13D | -3030.48 | 3640.9   | 2879.92 | 30    |
| H5B  | 4193.3   | 4445.97  | 5400.61 | 26    |
| H17B | 1247.97  | -1342.94 | 3346.09 | 29    |
| H13C | -1452.28 | 1471.45  | 2124.83 | 31    |
| H17C | -4848.86 | -111.99  | 1235.31 | 31    |
| H6C  | -7324.8  | 263.64   | 1352.06 | 28    |



|      |          |          |          |    |
|------|----------|----------|----------|----|
| H10G | 1106.29  | 389.63   | 3001.6   | 22 |
| H10H | 112.3    | 655.24   | 3242.7   | 22 |
| H3AA | 3567.08  | 2292.24  | 2070.53  | 26 |
| H3AB | 4752.42  | 3279.13  | 2434.26  | 26 |
| H11C | 4917.14  | 4494.02  | 483.81   | 30 |
| H11D | 3849.1   | 4687.56  | 670.82   | 30 |
| H17A | 4077.41  | 6333.99  | 1114     | 32 |
| H7B  | 4730.55  | 3545.41  | 7268.55  | 32 |
| H8D  | 2889.42  | 4896.05  | 3842.28  | 27 |
| H7A  | -459.16  | 1306.84  | -2011.02 | 34 |
| H8A  | -55.53   | 2866.29  | -1258.02 | 31 |
| H1BA | 966.11   | 1823.38  | 2537.63  | 28 |
| H1BB | 2093.26  | 2836.55  | 2972.72  | 28 |
| H8C  | -7056.26 | -2333.37 | 1295.15  | 28 |
| H16D | -173.74  | 5977     | 4936.51  | 37 |
| H14D | -3500.74 | 4203.86  | 3959.2   | 38 |
| H3CA | -2626.49 | 2527.89  | 4533.3   | 31 |
| H3CB | -2006.82 | 2401.92  | 3864.54  | 31 |
| H3DA | -1029.38 | 4664.07  | 217.61   | 31 |
| H3DB | -1515.28 | 5243.05  | 799.58   | 31 |
| H6B  | 4505.83  | 4722.76  | 6700.66  | 33 |
| H16B | 34.58    | -3010.32 | 2990.82  | 34 |
| H1CA | -2754.83 | -31.66   | 4270.6   | 32 |
| H1CB | -3244.3  | 517.83   | 4868.76  | 32 |
| H13B | -1132.52 | -700.19  | 4176.76  | 34 |
| H6A  | 41.41    | 188.74   | -1499.71 | 36 |
| H14C | -1126.15 | 907.96   | 983.44   | 39 |
| H1DA | -2328.39 | 2776.73  | 1190.17  | 33 |
| H1DB | -1682.4  | 2685.03  | 531.2    | 33 |
| H15D | -2066.78 | 5372.19  | 4994.6   | 37 |
| H16A | 5199.19  | 8023.49  | 1506.68  | 40 |
| H15C | -2657.15 | -176.92  | -30.88   | 38 |
| H16C | -4524.09 | -707.7   | 100.86   | 40 |
| H14B | -2309.95 | -2375.94 | 3871.65  | 42 |
| H15B | -1728.61 | -3539.48 | 3262.11  | 42 |
| H13A | 6930.58  | 5815.94  | 1300.37  | 46 |
| H15A | 7182.23  | 8614.35  | 1817.03  | 44 |
| H14A | 8046.94  | 7501.05  | 1761.27  | 61 |

**Table 6 Atomic Occupancy for BL-0657 (Cpd 19)**

| <b>Atom</b> | <b>Occupancy</b> | <b>Atom</b> | <b>Occupancy</b> |
|-------------|------------------|-------------|------------------|
| S1B         | 0.988(6)         | S1D         | 0.974(6)         |
| H3BB        | 0.988(6)         | H1BA        | 0.988(6)         |
| H3DA        | 0.974(6)         | H3DB        | 0.974(6)         |
| H1DB        | 0.974(6)         | H15C        | 0.25             |

## X-ray Structure Determination for BL-0679 (Cpd 21, CCDC 1995769)

### Experimental:

Crystals of BL-0679 (Cpd 21) were grown from ethyl acetate/hexanes. The single crystal X-ray diffraction studies were carried out on a Bruker APEX-II CCD diffractometer equipped with Mo K $\alpha$  radiation ( $\lambda = 0.71073$ ). A 0.20  $\times$  0.13  $\times$  0.08 mm colorless rod was mounted on a Cryolooop with Paratone oil. Data were collected in a nitrogen gas stream at 100(2) K using  $\phi$  and  $\omega$  scans. Crystal-to-detector distance was 60 mm with 5.00 s exposure time. A total of 11306 reflections were collected covering the indices  $-8 \leq h \leq 8$ ,  $-13 \leq k \leq 13$ ,  $-23 \leq l \leq 23$ . 2780 reflections were found to be symmetry independent, with a Rint of 0.0431. The space group was found to be P2<sub>1</sub>/c. Crystallographic data are summarized in Table 1.

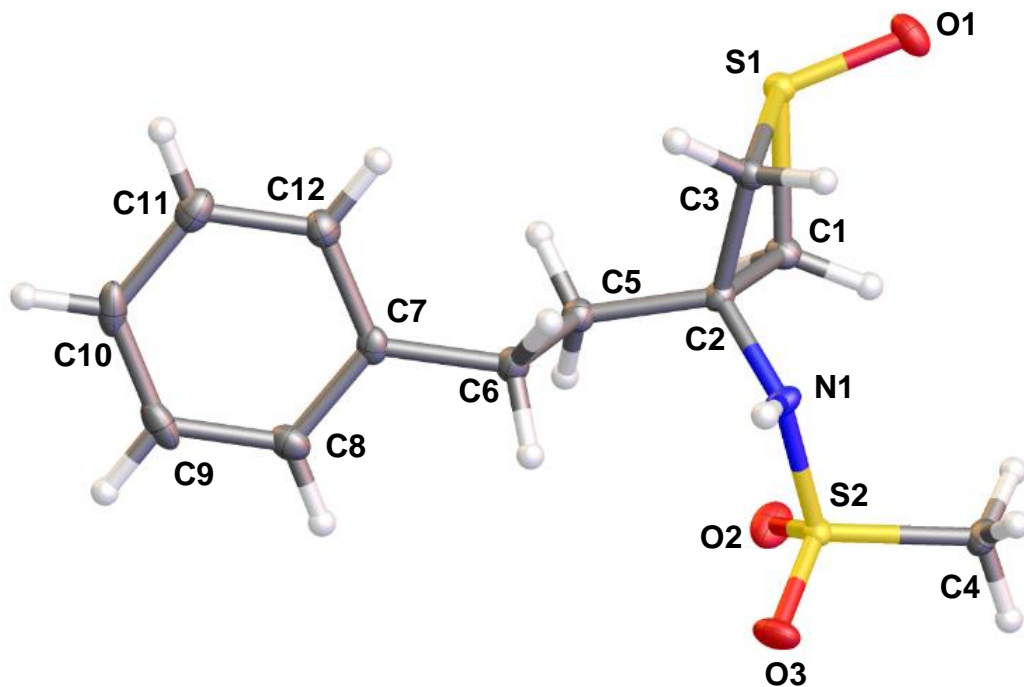

**Table 1 Crystal data and structure refinement for BL-0679 (Cpd 21)**

|                                             |                                                                |
|---------------------------------------------|----------------------------------------------------------------|
| Identification code                         | BL-0679                                                        |
| Empirical formula                           | C <sub>12</sub> H <sub>17</sub> NO <sub>3</sub> S <sub>2</sub> |
| Formula weight                              | 287.41                                                         |
| Temperature/K                               | 100.0                                                          |
| Crystal system                              | monoclinic                                                     |
| Space group                                 | P2 <sub>1</sub> /c                                             |
| a/Å                                         | 6.8795(3)                                                      |
| b/Å                                         | 10.5809(4)                                                     |
| c/Å                                         | 18.8700(7)                                                     |
| α/°                                         | 90                                                             |
| β/°                                         | 99.6090(10)                                                    |
| γ/°                                         | 90                                                             |
| Volume/Å <sup>3</sup>                       | 1354.30(9)                                                     |
| Z                                           | 4                                                              |
| ρ <sub>calc</sub> /cm <sup>3</sup>          | 1.4095                                                         |
| μ/mm <sup>-1</sup>                          | 0.393                                                          |
| F(000)                                      | 609.3                                                          |
| Crystal size/mm <sup>3</sup>                | 0.20 × 0.13 × 0.08                                             |
| Radiation                                   | Mo Kα (λ = 0.71073)                                            |
| 2θ range for data collection/°              | 4.38 to 52.78                                                  |
| Index ranges                                | -8 ≤ h ≤ 8, -13 ≤ k ≤ 13, -23 ≤ l ≤ 23                         |
| Reflections collected                       | 11306                                                          |
| Independent reflections                     | 2780 [R <sub>int</sub> = 0.0431, R <sub>sigma</sub> = 0.0332]  |
| Data/restraints/parameters                  | 2780/0/79                                                      |
| Goodness-of-fit on F <sup>2</sup>           | 1.027                                                          |
| Final R indexes [I ≥ 2σ (I)]                | R <sub>1</sub> = 0.0547, wR <sub>2</sub> = 0.1303              |
| Final R indexes [all data]                  | R <sub>1</sub> = 0.0573, wR <sub>2</sub> = 0.1326              |
| Largest diff. peak/hole / e Å <sup>-3</sup> | 1.04/-0.97                                                     |

**Table 2 Fractional Atomic Coordinates ( $\times 10^4$ ) and Equivalent Isotropic Displacement Parameters ( $\text{\AA}^2 \times 10^3$ ) for BL-0679 (Cpd 21)  $U_{eq}$  is defined as 1/3 of the trace of the orthogonalised  $U_{ij}$  tensor.**

| Atom | x           | y          | z          | U(eq)     |
|------|-------------|------------|------------|-----------|
| S2   | 5913.9(9)   | 4941.8(6)  | 2456.7(3)  | 12.74(18) |
| S1   | 10149.1(10) | 8053.8(6)  | 3776.8(4)  | 13.2(2)   |
| O2   | 5126(3)     | 5045.8(19) | 3114.3(11) | 21.6(4)   |
| O3   | 5897(3)     | 3733.1(19) | 2106.6(11) | 22.7(4)   |
| O1   | 9717(3)     | 9292.2(18) | 3391.9(10) | 19.6(4)   |
| N1   | 8163(3)     | 5453(2)    | 2607.3(11) | 14.1(4)   |
| C12  | 13962(4)    | 3479(3)    | 4478.5(14) | 17.5(5)   |
| C8   | 11426(4)    | 1897(3)    | 4375.8(14) | 18.5(5)   |
| C7   | 12088(4)    | 3059(2)    | 4161.3(13) | 14.8(5)   |
| C5   | 9784(4)     | 4953(2)    | 3871.3(13) | 14.3(5)   |
| C3   | 10864(4)    | 6831(2)    | 3172.6(13) | 13.9(5)   |
| C9   | 12608(4)    | 1165(3)    | 4889.0(15) | 22.4(6)   |
| C11  | 15139(4)    | 2748(3)    | 4986.8(15) | 20.2(6)   |
| C4   | 4615(4)     | 6001(3)    | 1829.4(14) | 17.9(5)   |
| C6   | 10863(4)    | 3845(2)    | 3583.7(14) | 15.9(5)   |
| C10  | 14472(4)    | 1588(3)    | 5197.1(15) | 21.6(6)   |
| C1   | 7963(4)     | 7033(2)    | 3596.4(14) | 14.5(5)   |
| C2   | 9133(4)     | 5968(2)    | 3298.6(13) | 12.0(5)   |
| S1ab | 8898(12)    | 8019(8)    | 3014(4)    | 20(2)     |

**Table 3 Bond Lengths for BL-0679 (Cpd 21)**

| Atom | Atom | Length/Å | Atom | Atom | Length/Å |
|------|------|----------|------|------|----------|
| S2   | O2   | 1.439(2) | C8   | C9   | 1.391(4) |
| S2   | O3   | 1.439(2) | C7   | C6   | 1.511(3) |
| S2   | N1   | 1.619(2) | C5   | C6   | 1.534(4) |
| S2   | C4   | 1.761(3) | C5   | C2   | 1.536(3) |
| S1   | O1   | 1.504(2) | C3   | C2   | 1.550(3) |
| S1   | C3   | 1.844(3) | C3   | S1ab | 1.833(9) |
| S1   | C1   | 1.837(3) | C9   | C10  | 1.391(4) |
| O1   | S1ab | 1.584(8) | C11  | C10  | 1.392(4) |
| N1   | C2   | 1.467(3) | C1   | C2   | 1.545(3) |
| C12  | C7   | 1.400(4) | C1   | S1ab | 1.717(8) |
| C12  | C11  | 1.383(4) | C2   | S1ab | 2.235(8) |
| C8   | C7   | 1.394(4) |      |      |          |

**Table 4 Bond Angles for BL-0679 (Cpd 21)**

| Atom | Atom | Atom | Angle/°    | Atom | Atom | Atom | Angle/°    |
|------|------|------|------------|------|------|------|------------|
| O3   | S2   | O2   | 119.25(12) | C10  | C9   | C8   | 120.2(3)   |
| N1   | S2   | O2   | 108.03(11) | C10  | C11  | C12  | 120.5(3)   |
| N1   | S2   | O3   | 108.17(12) | C5   | C6   | C7   | 114.2(2)   |
| C4   | S2   | O2   | 108.01(12) | C11  | C10  | C9   | 119.3(3)   |
| C4   | S2   | O3   | 107.02(12) | C5   | C2   | N1   | 113.7(2)   |
| C4   | S2   | N1   | 105.58(12) | C3   | C2   | N1   | 109.25(19) |
| C3   | S1   | O1   | 111.36(11) | C3   | C2   | C5   | 112.3(2)   |
| C1   | S1   | O1   | 109.46(11) | C1   | C2   | N1   | 114.0(2)   |
| C1   | S1   | C3   | 76.57(11)  | C1   | C2   | C5   | 111.3(2)   |
| C2   | N1   | S2   | 124.04(17) | C1   | C2   | C3   | 94.93(19)  |
| C11  | C12  | C7   | 120.6(3)   | C3   | S1ab | O1   | 108.2(5)   |
| C9   | C8   | C7   | 120.8(3)   | C1   | S1ab | O1   | 111.8(5)   |
| C8   | C7   | C12  | 118.6(2)   | C1   | S1ab | C3   | 79.9(4)    |
| C6   | C7   | C12  | 119.8(2)   | C2   | S1ab | O1   | 135.4(5)   |
| C6   | C7   | C8   | 121.6(2)   | C2   | S1ab | C3   | 43.4(2)    |
| C2   | C5   | C6   | 112.7(2)   | C2   | S1ab | C1   | 43.6(2)    |

**Table 5 Hydrogen Atom Coordinates ( $\text{\AA}\times 10^4$ ) and Isotropic Displacement Parameters ( $\text{\AA}^2\times 10^3$ ) for BL-0679 (Cpd 21)**

| Atom | x        | y        | z          | U(eq)   |
|------|----------|----------|------------|---------|
| H1   | 8894(3)  | 5009(2)  | 2350.3(11) | 17.0(5) |
| H12  | 14430(4) | 4273(3)  | 4343.3(14) | 21.0(6) |
| H8   | 10153(4) | 1602(3)  | 4169.2(14) | 22.2(7) |
| H5a  | 8609(4)  | 4627(2)  | 4051.4(13) | 17.2(6) |
| H5b  | 10665(4) | 5343(2)  | 4281.3(13) | 17.2(6) |
| H3a  | 10765(4) | 7118(2)  | 2668.5(13) | 16.7(6) |
| H3b  | 12177(4) | 6459(2)  | 3346.7(13) | 16.7(6) |
| H3c  | 11875(4) | 6983(2)  | 3603.1(13) | 16.7(6) |
| H3d  | 11462(4) | 6614(2)  | 2746.2(13) | 16.7(6) |
| H9   | 12140(4) | 374(3)   | 5029.4(15) | 26.8(7) |
| H11  | 16413(4) | 3042(3)  | 5194.1(15) | 24.2(7) |
| H4a  | 3256(9)  | 5704(11) | 1688(8)    | 26.8(8) |
| H4b  | 4610(30) | 6841(5)  | 2047(4)    | 26.8(8) |
| H4c  | 5258(18) | 6045(15) | 1404(5)    | 26.8(8) |
| H6a  | 11734(4) | 4182(2)  | 3260.5(14) | 19.1(6) |
| H6b  | 9877(4)  | 3290(2)  | 3293.9(14) | 19.1(6) |
| H10  | 15283(4) | 1089(3)  | 5547.3(15) | 25.9(7) |
| H1a  | 7448(4)  | 6788(2)  | 4036.4(14) | 17.4(6) |
| H1b  | 6896(4)  | 7387(2)  | 3233.3(14) | 17.4(6) |
| H1c  | 6514(4)  | 6926(2)  | 3489.4(14) | 17.4(6) |
| H1d  | 8415(4)  | 7228(2)  | 4110.6(14) | 17.4(6) |

**Table 6 Atomic Occupancy for BL-0679 (Cpd 21)**

| Atom | Occupancy | Atom | Occupancy |
|------|-----------|------|-----------|
| S1   | 0.915(3)  | H3a  | 0.915(3)  |
| H3c  | 0.085(3)  | H3d  | 0.085(3)  |
| H1b  | 0.915(3)  | H1c  | 0.085(3)  |
| S1ab | 0.085(3)  |      |           |
